# Supplementary material for: INVADEseq to identify cell-adherent or invasive bacteria and the associated host transcriptome at single-cell-level resolution
Source: Nat Protoc. Author manuscript; Available in PMC 2024 Jan 16. (PMC10790651; doi:10.1038/s41596-023-00888-7)
Supplement: Supplementary materials 1 [file NIHMS1955151-supplement-Supplementary_materials_1.xlsx]

## Sheet: List
Supplementary Tables
Supplementary Table 1			Single-cell RNA sequencing; Cell-associated microbiome composition in an individual OSCC patient
Supplementary Table 2			Single-cell RNA sequencing; Gene expression profile for an individual OSCC patient. All cluster analysis
Supplementary Table 3			Single-cell RNA sequencing; Gene Set Enrichment Analysis (GSEA) for an individual OSCC patient. All cluster analysis
Supplementary Table 4			Single-cell RNA sequencing; Cell-associated microbiome composition from the high bacteria load OSCC cohort (High_Bac).
Supplementary Table 5			Single-cell RNA sequencing; Gene expression profile in specific cell clusters from the high bacteria load OSCC cohort (High_Bac). Integrated data.
Supplementary Table 6			Single-cell RNA sequencing; Gene Set Enrichment Analysis (GSEA) for specific cell clusters from the high bacteria load OSCC cohort (High_Bac). Integrated data.
Supplementary Table 7			Single-cell RNA sequencing; Cell-associated microbiome composition from the low bacteria load OSCC cohort (Low_Bac).
Supplementary Table 8			Single-cell RNA sequencing; Gene expression profile in specific cell clusters from the low bacteria load OSCC cohort (Low_Bac). Integrated data.

## Sheet: Supplementary Table 1
Supplementary Table 1: Single-cell RNA sequencing; Cell-associated microbiome composition in an individual OSCC patient.
Table indicates the microbiome composition in a OSCC sample including the number of UMI transcripts for each bacterium per cell
Genus	Cell-associated microbiome composition without a UMI cutoff					Genus	Cell-associated microbiome composition with a ≥4 UMI cutoff per cell
Fusobacterium	88938					Fusobacterium	84465
Treponema	63127					Treponema	60866
Campylobacter	2371					Campylobacter	1861
Prevotella	1167					Prevotella	757
Lentimicrobium	455					Tannerella	206
Tannerella	315					Lentimicrobium	144
Alistipes	304					Alistipes	68
Chlorobium	213					Clostridium	45
Dysgonomonas	155					unclassified_Prevotellaceae	34
Gloeomargarita	153					Chlorobium	33
Bacteroides	150					Polaribacter	30
Myroides	99					Alloprevotella	28
Saprospira	93					Leptotrichia	21
Polaribacter	92					Dysgonomonas	19
Owenweeksia	91					Porphyromonas	18
Algoriphagus	90					Algoriphagus	15
Porphyromonas	86					Gloeomargarita	15
Clostridium	85					Myroides	14
Phaeodactylibacter	79					Schleiferia	14
Ignavibacterium	73					Haemophilus	12
Marivirga	72					Aggregatibacter	12
unclassified_Prevotellaceae	60					Ignavibacterium	12
Adhaeribacter	59					Kordia	10
Schleiferia	58					Owenweeksia	10
Asinibacterium	57					Cytophaga	9
Kordia	53					Capnocytophaga	8
Leptotrichia	47					Peptostreptococcus	8
Cecembia	46					Phocaeicola	8
Alloprevotella	40					Gemella	6
Cytophaga	39					Cecembia	5
Spirochaeta	38					Saprospira	5
Filifactor	36					Aminobacterium	5
Mucinivorans	31					Ruminococcus	5
Peptostreptococcus	30					Mucinivorans	4
Draconibacterium	30					Anaerovorax	4
Sphingobacterium	29					Brochothrix	4
Blattabacterium	26					Filifactor	4
Echinicola	26					unclassified_Ruminococcaceae	4
Fluviicola	24
Filimonas	22
Chryseobacterium	21
Niabella	20
Acidiferrobacter	19
Parvimonas	19
Parabacteroides	18
Emticicia	17
Mucilaginibacter	17
Tangfeifania	16
Fervidobacterium	16
Capnocytophaga	14
Gemella	14
Haemophilus	14
Sporocytophaga	14
Marinifilum	14
Ruminococcus	14
Desulfuribacillus	13
Reichenbachiella	13
Eubacterium	13
unclassified_Lachnospiraceae	13
Aggregatibacter	12
Dyadobacter	12
Mycoplasma	11
Thermoanaerobacterium	11
Bacillus	10
Phocaeicola	10
Desulfothermus	10
Faecalitalea	10
Crocinitomix	9
Butyrivibrio	8
Chryseolinea	8
Millionella	8
unclassified_Porphyromonadaceae	7
Anaerophaga	7
Desulfotignum	7
Lachnoanaerobaculum	7
Neofamilia	7
Nonlabens	7
Salinivirga	7
Dialister	6
Gottschalkia	6
Selenomonas	6
unclassified_Ruminococcaceae	6
Shigella	5
Aminobacterium	5
Hymenobacter	5
Oribacterium	5
Anaerovorax	5
Christensenella	5
Desulfovibrio	5
unclassified_Anaerolineaceae	5
Lactobacillus	4
unclassified_Flammeovirgaceae	4
Brochothrix	4
Clostridioides	4
Kyrpidia	4
Prevotellamassilia	4
Roseivirga	4
Syntrophomonas	4
unclassified_Peptostreptococcaceae	4
Pseudomonas	3
Gelidibacter	3
Rhodonellum	3
Carboxydothermus	3
Desulfotomaculum	3
Mobilibacterium	3
Tissierella	3
unclassified_Tissierellia_.miscellaneous.	3
Methylobacterium	2
Corynebacterium	2
Flammeovirga	2
Amoebophilaceae	2
Brevundimonas	2
Clostridiaceae	2
Defluviitalea	2
Desulfococcus	2
Dethiobacter	2
Emergencia	2
Epulopiscium	2
Facklamia	2
Flavisolibacter	2
Fulvivirga	2
Geobacillus	2
Ilyobacter	2
Intestinimonas	2
Labilibacter	2
Leeuwenhoekiella	2
Pajaroellobacter	2
Sediminibacterium	2
Spirochaetaceae	2
Thermovirga	2
unclassified_Bacteroidales_.miscellaneous.	2
unclassified_Bacteroidetes_.miscellaneous.	2
unclassified_Flavobacteriia	2
Fusicatenibacter	2
Mitsuokella	2
Luteimonas	1
Ruminiclostridium	1
Streptococcus	1
Dethiosulfatarculus	1
Solobacterium	1
Tenacibaculum	1
Acidovorax	1
Peptoanaerobacter	1
Catonella	1
Mogibacterium	1
Pseudobutyrivibrio	1
Shuttleworthia	1
Bradyrhizobium	1
Altererythrobacter	1
Atopobium	1
Balneola	1
Borrelia	1
Caldanaerobacter	1
Chlamydia	1
Criibacterium	1
Cruoricaptor	1
Dehalogenimonas	1
Desulfomonile	1
Desulfonatronum	1
Enterococcus	1
Flexithrix	1
Geobacter	1
Geosporobacter	1
Halonatronum	1
Hippea	1
Holdemania	1
Leadbetterella	1
Lentibacillus	1
Limnochorda	1
Marinitoga	1
Mastocarpus	1
Moraxella	1
Neosynechococcus	1
Olsenella	1
Oxobacter	1
Parvibaculum	1
Peptococcaceae	1
Phormidium	1
Siansivirga	1
Stomatobaculum	1
Tepidanaerobacter	1
Thermobrachium	1
Thermomonas	1
Traorella	1
Xanthomonas	1
Youngiibacter	1
unclassified_Bacteroidales	1
unclassified_Caulobacteraceae	1
unclassified_Clostridiales_Family_XIII._Incertae_Sedis	1
unclassified_Peptostreptococcaceae_.miscellaneous.	1
Bulleidia	1
Dorea	1
Acetoanaerobium	1
Alkaliphilus	1
Anaerosalibacter	1
Butyricicoccus	1
Ideonella	1
Salmonella	1
unclassified_Peptococcaceae	1

## Sheet: Supplementary Table 2
Supplementary Table 2: Single-cell RNA sequencing; gene expression profile for an individual OSCC patient. All cluster analysis
Differential expression analysis between cellular groups was performed using the FindMarker function from the Seurat package based on the Wilcoxon Rank Sum test. The log2 fold change is calculated based on the difference in the gene expression average between two groups. Adjusted p-values were calculated using the Bonferroni correction test for each gene in the dataset. p-value <0.05 indicates si…
Differential gene expression profile in a OSCC tumor sample, comparing Total bacteria-associated cells (Total Bac.+) vs Total bacteria-negative cells (Total Bac-) without a UMI cutoff							Differential gene expression profile in a OSCC tumor sample, comparing Total bacteria-associated cells vs Total bacteria-negative cells with a ≥4 UMI cutoff							Differential gene expression profile in a OSCC tumor sample, comparing Fusobacterium-associated cells vs Total bacteria-negative cells without a UMI cutoff							Differential gene expression profile in a OSCC tumor sample, comparing Fusobacterium-associated cells vs Total bacteria-negative cells with a ≥4 UMI cutoff							Differential gene expression profile in a OSCC tumor sample, comparing Fusobacterium-associated cells vs Fusobacterium-negative cells without a UMI cutoff							Differential gene expression profile in a OSCC tumor sample, comparing Fusobacterium-associated cells vs Fusobacterium-negative cells with a ≥4 UMI cutoff
	p_val	avg_log2FC	pct.1	pct.2	p_val_adj			p_val	avg_log2FC	pct.1	pct.2	p_val_adj			p_val	avg_log2FC	pct.1	pct.2	p_val_adj			p_val	avg_log2FC	pct.1	pct.2	p_val_adj			p_val	avg_log2FC	pct.1	pct.2	p_val_adj			p_val	avg_log2FC	pct.1	pct.2	p_val_adj
CCL3	7.15e-80	1.85094	0.415	0.149	1.63e-75		CCL3	1.51e-171	2.49387	0.608	0.149	3.43e-167		CCL3	8.5246e-81	1.85794	0.423	0.149	1.93875e-76		CCL3	1.42479e-161	2.51254	0.649	0.149	3.2404e-157		CTSL	4.7e-76	0.997998	0.497	0.25	1.07e-71		CTSL	3.82e-160	1.64665	0.723	0.25	8.7e-156
C1QB	4.96e-64	1.83452	0.292	0.076	1.13e-59		C1QB	5.84e-137	2.47543	0.465	0.076	1.33e-132		C1QB	6.9187e-65	1.84741	0.297	0.076	1.57352e-60		C1QB	3.9621e-126	2.48494	0.481	0.076	9.011e-122		FGFBP1	1.44e-24	0.963194	0.104	0.033	3.27e-20		FGFBP1	4.64e-54	1.59419	0.184	0.033	1.05e-49
C1QC	6.55e-63	1.72345	0.283	0.071	1.49e-58		C1QC	1.35e-135	2.35244	0.457	0.071	3.07e-131		CTSL	9.52276e-114	1.74442	0.497	0.149	2.16576e-109		CTSL	1.44454e-196	2.39308	0.723	0.149	3.28531e-192		C1QB	3.3e-42	0.95137	0.297	0.143	7.5e-38		C1QB	1.72e-104	1.58889	0.481	0.143	3.92e-100
CTSL	1.8e-111	1.71178	0.486	0.149	4.09e-107		C1QA	6.28e-146	2.31962	0.486	0.076	1.43e-141		C1QC	1.28474e-64	1.7307	0.291	0.071	2.92188e-60		C1QC	1.40036e-129	2.37736	0.483	0.071	3.18485e-125		C1QA	2.5e-50	0.939544	0.316	0.142	5.69e-46		CCL3	3.93e-132	1.58485	0.649	0.231	8.93e-128
C1QA	2.78e-69	1.69123	0.307	0.076	6.33e-65		CTSL	1.04e-213	2.31783	0.685	0.149	2.37e-209		C1QA	1.03965e-71	1.71287	0.316	0.076	2.36448e-67		C1QA	2.05528e-139	2.33159	0.515	0.076	4.67433e-135		CCL3	9.01e-52	0.930252	0.423	0.231	2.05e-47		C1QA	6.67e-120	1.55826	0.515	0.142	1.52e-115
IL1B	1.14e-83	1.57889	0.362	0.088	2.6e-79		IL1B	4.48e-181	2.21532	0.577	0.088	1.02e-176		IL1B	3.51933e-84	1.5745	0.367	0.088	8.00402e-80		IL1B	2.76255e-173	2.23811	0.616	0.088	6.28287e-169		KRT6A	5.21e-16	0.897661	0.164	0.092	1.18e-11		C1QC	1.42e-110	1.53376	0.483	0.134	3.22e-106
RNASE1	2.08e-55	1.50723	0.306	0.099	4.74e-51		FCGR2A	9.26e-184	2.08075	0.571	0.085	2.11e-179		RNASE1	6.36099e-58	1.51674	0.316	0.099	1.44668e-53		RNASE1	2.20491e-118	2.14655	0.507	0.099	5.01464e-114		C1QC	5.75e-44	0.887098	0.291	0.134	1.31e-39		KRT6A	1.84e-39	1.52792	0.253	0.092	4.18e-35
IFI30	1.31e-107	1.50299	0.615	0.288	2.97e-103		CALHM6	9.3e-200	2.07924	0.621	0.109	2.11e-195		CCL8	2.99978e-48	1.50558	0.199	0.035	6.8224e-44		FCGR2A	3.95609e-169	2.13412	0.593	0.085	8.99733e-165		SPP1	4.32e-23	0.873187	0.135	0.054	9.83e-19		CCL3L1	2.98e-119	1.49396	0.537	0.155	6.77e-115
IER3	4.7e-106	1.5018	0.521	0.192	1.07e-101		CXCL8	3.89e-188	2.0791	0.628	0.13	8.86e-184		CALHM6	1.85053e-95	1.49888	0.412	0.109	4.20865e-91		CCL8	1.44247e-83	2.12389	0.315	0.035	3.2806e-79		KRT5	9.09e-17	0.835962	0.175	0.099	2.07e-12		IL1B	1.55e-140	1.44815	0.616	0.175	3.52e-136
CCL8	1e-46	1.50031	0.193	0.035	2.28e-42		IER3	1.08e-213	2.07791	0.725	0.192	2.45e-209		IFI30	2.98421e-106	1.4939	0.62	0.288	6.78699e-102		CCL3L1	9.9439e-144	2.119	0.537	0.081	2.26154e-139		CXCL3	4.69e-55	0.83022	0.37	0.175	1.07e-50		CXCL3	7.74e-125	1.447	0.576	0.175	1.76e-120
CALHM6	8.92e-95	1.49018	0.405	0.109	2.03e-90		IFI30	9.13e-230	2.07568	0.818	0.288	2.08e-225		IER3	2.40996e-107	1.4893	0.532	0.192	5.48097e-103		IER3	9.64575e-194	2.11025	0.764	0.192	2.19373e-189		RNASE1	1.39e-42	0.815558	0.316	0.154	3.17e-38		RNASE1	1.19e-105	1.44537	0.507	0.154	2.71e-101
FCGR2A	3.95e-83	1.47076	0.352	0.085	8.98e-79		RNASE1	1.29e-119	2.0751	0.469	0.099	2.93e-115		FCGR2A	6.19976e-84	1.46531	0.358	0.085	1.41001e-79		CXCL3	6.69831e-149	2.07948	0.576	0.097	1.5234e-144		CCL3L1	1.27e-43	0.810148	0.32	0.155	2.89e-39		CTSB	1.47e-175	1.42764	0.861	0.426	3.33e-171
CXCL8	1.18e-87	1.46271	0.417	0.13	2.68e-83		CCL8	1.65e-86	2.06063	0.302	0.035	3.76e-82		CXCL3	1.92582e-80	1.4627	0.37	0.097	4.37989e-76		PLAUR	3.73586e-203	2.06682	0.727	0.139	8.49647e-199		CALHM6	4.77e-60	0.805404	0.412	0.203	1.09e-55		CCL8	9.87e-70	1.41325	0.315	0.081	2.25e-65
FCER1G	3.86e-90	1.45481	0.461	0.164	8.78e-86		CCL3L1	4.43e-144	2.05081	0.493	0.081	1.01e-139		FCER1G	7.49354e-89	1.44446	0.464	0.164	1.70426e-84		IFI30	4.63165e-195	2.06551	0.844	0.288	1.05338e-190		CTSB	2.85e-76	0.799515	0.652	0.426	6.48e-72		SPP1	3e-65	1.41215	0.255	0.054	6.82e-61
CXCL3	2.7e-78	1.44372	0.361	0.097	6.15e-74		PLAUR	2.3e-224	2.03371	0.696	0.139	5.24e-220		PLAUR	5.73511e-113	1.44357	0.488	0.139	1.30434e-108		CALHM6	1.27769e-177	2.06305	0.641	0.109	2.90584e-173		CCL8	9.66e-34	0.794942	0.199	0.081	2.2e-29		FCGR2A	8.24e-139	1.40796	0.593	0.169	1.87e-134
PLAUR	1.36e-111	1.43823	0.478	0.139	3.1e-107		CXCL3	6.03e-157	2.02606	0.544	0.097	1.37e-152		CCL3L1	3.15086e-69	1.43518	0.32	0.081	7.166e-65		CXCL8	9.41897e-179	2.02183	0.675	0.13	2.14216e-174		IL1B	1e-51	0.78454	0.367	0.175	2.28e-47		PLAUR	1.14e-163	1.39386	0.727	0.243	2.58e-159
CXCL2	4.25e-93	1.43312	0.438	0.133	9.66e-89		FCER1G	9.12e-193	2.02276	0.672	0.164	2.07e-188		CXCL2	2.70773e-94	1.43267	0.447	0.133	6.15818e-90		CTSB	2.56065e-213	1.99555	0.861	0.307	5.82369e-209		PLAUR	5.03e-72	0.77061	0.488	0.243	1.14e-67		KRT5	9.14e-38	1.36986	0.259	0.099	2.08e-33
CCL3L1	1.33e-68	1.41846	0.314	0.081	3.02e-64		CXCL1	1.18e-102	1.96834	0.404	0.076	2.69e-98		CXCL8	2.88538e-88	1.42219	0.424	0.13	6.56223e-84		CXCL1	7.55818e-101	1.98054	0.435	0.076	1.71896e-96		TGFBI	5.69e-78	0.762269	0.424	0.187	1.29e-73		CALHM6	1.44e-141	1.36957	0.641	0.203	3.27e-137
CXCL10	5.83e-75	1.37985	0.394	0.131	1.33e-70		CXCL2	7.57e-185	1.93584	0.639	0.133	1.72e-180		CXCL10	6.46224e-78	1.37287	0.406	0.131	1.46971e-73		FCER1G	2.1597e-165	1.97267	0.689	0.164	4.91181e-161		KRT14	3.56e-15	0.759275	0.217	0.138	8.1e-11		IER3	7.77e-152	1.34338	0.764	0.289	1.77e-147
CXCL1	1.36e-51	1.37202	0.267	0.076	3.1e-47		GLUL	1.28e-204	1.9111	0.764	0.257	2.9e-200		CTSB	3.81292e-120	1.36743	0.652	0.307	8.67173e-116		CXCL2	6.71944e-171	1.94796	0.675	0.133	1.5282e-166		G0S2	9.45e-35	0.750637	0.239	0.109	2.15e-30		TNF	2.13e-86	1.33079	0.42	0.127	4.83e-82
GLUL	1.38e-96	1.35609	0.568	0.257	3.14e-92		CTSB	5.16e-241	1.9052	0.829	0.307	1.17e-236		CXCL1	3.84755e-53	1.36146	0.275	0.076	8.75047e-49		GLUL	8.19556e-177	1.94469	0.79	0.257	1.86392e-172		CXCL2	3.35e-60	0.744744	0.447	0.227	7.63e-56		GLUL	6.8e-141	1.30845	0.79	0.353	1.55e-136
CTSB	1.66e-121	1.34592	0.649	0.307	3.77e-117		MS4A7	2.43e-171	1.88031	0.515	0.063	5.53e-167		GLUL	8.22229e-97	1.35756	0.576	0.257	1.87e-92		MS4A7	6.07131e-161	1.90217	0.539	0.063	1.3808e-156		FCGR2A	1.5e-52	0.739146	0.358	0.169	3.41e-48		IFI30	1.3e-150	1.30832	0.844	0.396	2.96e-146
MS4A7	2.04e-83	1.32725	0.321	0.063	4.64e-79		FTL	4.89e-202	1.85873	0.969	0.806	1.11e-197		SPP1	2.64225e-31	1.32331	0.135	0.024	6.00926e-27		SPP1	5.61939e-69	1.86228	0.255	0.024	1.27802e-64		IFI30	1.74e-63	0.736709	0.62	0.396	3.96e-59		CCL7	4.5e-53	1.30276	0.186	0.033	1.02e-48
FTL	1.21e-87	1.32535	0.922	0.806	2.74e-83		SPP1	3.93e-58	1.85084	0.213	0.024	8.94e-54		MS4A7	1.38522e-83	1.31544	0.325	0.063	3.1504e-79		FTL	1.94942e-166	1.8535	0.977	0.806	4.43357e-162		CCL7	1.83e-23	0.732012	0.104	0.033	4.16e-19		CXCL1	6.72e-85	1.29885	0.435	0.13	1.53e-80
TYROBP	8.31e-76	1.29634	0.464	0.196	1.89e-71		TYROBP	1.58e-172	1.84767	0.671	0.196	3.6e-168		FTL	1.48911e-86	1.30736	0.922	0.806	3.38668e-82		SOD2	6.64462e-186	1.82046	0.864	0.327	1.51119e-181		IER3	4.27e-67	0.722434	0.532	0.289	9.7e-63		CTSD	4.8e-115	1.26209	0.789	0.408	1.09e-110
SPP1	4.15e-30	1.27741	0.13	0.024	9.44e-26		MMP12	2.67e-39	1.84122	0.144	0.015	6.07e-35		TYROBP	2.34019e-74	1.28891	0.466	0.196	5.32229e-70		TYROBP	3.02115e-147	1.81596	0.689	0.196	6.871e-143		GLUL	7.41e-61	0.72132	0.576	0.353	1.68e-56		MMP9	3.92e-112	1.26169	0.427	0.099	8.91e-108
SOD2	5.4e-100	1.26328	0.639	0.327	1.23e-95		CXCL10	2.33e-145	1.81299	0.562	0.131	5.29e-141		CTSD	2.75375e-86	1.23993	0.621	0.318	6.26286e-82		CTSD	5.19384e-144	1.80192	0.789	0.318	1.18124e-139		FCER1G	3.02e-51	0.713135	0.464	0.264	6.86e-47		CXCL2	1.01e-134	1.26003	0.675	0.227	2.29e-130
C15orf48	8.81e-81	1.23739	0.367	0.097	2e-76		SOD2	1.37e-211	1.80992	0.828	0.327	3.12e-207		SOD2	2.22724e-99	1.23664	0.648	0.327	5.06541e-95		MMP12	1.61347e-40	1.79204	0.155	0.015	3.66951e-36		CTSD	3.88e-56	0.700112	0.621	0.408	8.84e-52		MMP19	5.63e-97	1.25879	0.443	0.125	1.28e-92
CTSD	1.41e-85	1.23037	0.613	0.318	3.2e-81		C15orf48	5.81e-169	1.79195	0.567	0.097	1.32e-164		CD163	4.00494e-74	1.19721	0.3	0.058	9.10843e-70		CXCL10	8.54816e-136	1.78787	0.594	0.131	1.94411e-131		CXCL10	4.59e-56	0.697086	0.406	0.204	1.04e-51		TGFBI	2.16e-158	1.25171	0.642	0.187	4.92e-154
CXCL9	5e-57	1.18777	0.292	0.083	1.14e-52		MMP19	8.07e-127	1.77275	0.431	0.062	1.84e-122		C15orf48	5.04252e-80	1.19574	0.37	0.097	1.14682e-75		MMP19	2.95909e-116	1.77892	0.443	0.062	6.72985e-112		TNF	2.25e-33	0.688711	0.258	0.127	5.13e-29		MS4A7	4.77e-127	1.24353	0.539	0.147	1.08e-122
CD163	6.5e-73	1.1876	0.294	0.058	1.48e-68		CTSD	6.05e-164	1.74809	0.759	0.318	1.38e-159		MMP19	2.80731e-67	1.18962	0.289	0.062	6.38466e-63		CD163	6.22892e-147	1.75504	0.509	0.058	1.41664e-142		MS4A6A	9.24e-46	0.687775	0.329	0.159	2.1e-41		CCL2	4.97e-84	1.24298	0.449	0.142	1.13e-79
MMP19	3.78e-65	1.1824	0.28	0.062	8.59e-61		CD163	1.47e-156	1.73283	0.488	0.058	3.33e-152		CXCL9	2.7494e-60	1.17705	0.304	0.083	6.25297e-56		TNF	4.92204e-95	1.71079	0.42	0.079	1.11942e-90		CD163	2.66e-48	0.681241	0.3	0.131	6.04e-44		FCER1G	2.08e-124	1.24135	0.689	0.264	4.73e-120
CD14	3.21e-75	1.15455	0.334	0.081	7.3e-71		CD14	3.72e-157	1.69193	0.525	0.081	8.46e-153		CD14	5.33962e-77	1.16719	0.342	0.081	1.21439e-72		C15orf48	3.10219e-155	1.70048	0.595	0.097	7.05531e-151		CXCL1	2.16e-36	0.679768	0.275	0.13	4.91e-32		CD163	5.08e-123	1.23907	0.509	0.131	1.15e-118
MS4A6A	3.28e-72	1.15061	0.324	0.08	7.45e-68		MS4A6A	2.43e-151	1.66801	0.511	0.08	5.52e-147		MS4A6A	1.08018e-72	1.16612	0.329	0.08	2.45665e-68		FCGR3A	1.84404e-139	1.68919	0.512	0.07	4.1939e-135		CD14	1.03e-51	0.678268	0.342	0.157	2.33e-47		KRT14	1.83e-34	1.22951	0.304	0.138	4.17e-30
CD68	5.53e-94	1.12899	0.379	0.09	1.26e-89		FCGR3A	1.86e-148	1.65909	0.489	0.07	4.22e-144		G0S2	1.08142e-47	1.15061	0.239	0.061	2.45947e-43		CCL2	1.46234e-96	1.68246	0.449	0.09	3.3258e-92		MMP19	7.25e-47	0.669488	0.289	0.125	1.65e-42		FCGR3A	1.31e-118	1.19987	0.512	0.139	2.99e-114
FCGR3A	1.35e-69	1.12761	0.303	0.07	3.07e-65		G0S2	1.77e-93	1.62953	0.363	0.061	4.02e-89		CD68	5.49614e-95	1.13584	0.386	0.09	1.24999e-90		CD68	1.0112e-176	1.65934	0.61	0.09	2.29977e-172		LAMC2	9.72e-25	0.663415	0.124	0.045	2.21e-20		CXCL8	3.19e-143	1.1981	0.675	0.22	7.26e-139
G0S2	7.32e-46	1.11537	0.232	0.061	1.66e-41		TNF	5.4e-100	1.62953	0.401	0.079	1.23e-95		FCGR3A	2.36197e-71	1.13509	0.311	0.07	5.37184e-67		CD14	3.2721e-143	1.65671	0.544	0.081	7.44173e-139		FN1	4.96e-22	0.661748	0.256	0.154	1.13e-17		THBS1	5.38e-107	1.19028	0.565	0.198	1.22e-102
AIF1	1.32e-76	1.06637	0.387	0.117	3.01e-72		CD68	4.05e-183	1.61723	0.57	0.09	9.22e-179		PSAP	5.16561e-87	1.08039	0.642	0.34	1.17481e-82		MS4A6A	1.03087e-136	1.65003	0.526	0.08	2.34451e-132		TYROBP	1e-43	0.661225	0.466	0.288	2.28e-39		TYROBP	1.55e-114	1.18828	0.689	0.288	3.53e-110
PSAP	1.53e-86	1.06468	0.633	0.34	3.48e-82		AIF1	5.2e-170	1.5918	0.601	0.117	1.18e-165		CCL2	4.47064e-54	1.07558	0.299	0.09	1.01676e-49		SLC11A1	3.35741e-143	1.64067	0.516	0.062	7.63575e-139		MS4A7	3.5e-50	0.656802	0.325	0.147	7.97e-46		PSAP	8.91e-121	1.18618	0.816	0.429	2.03e-116
CCL2	1.56e-51	1.0628	0.288	0.09	3.55e-47		SLC11A1	1.28e-148	1.56391	0.487	0.062	2.92e-144		TNF	1.28786e-45	1.06871	0.258	0.079	2.92897e-41		PSAP	2.81769e-150	1.61823	0.816	0.34	6.40827e-146		HSPA1A	7.23e-47	0.653715	0.345	0.17	1.64e-42		G0S2	1.29e-82	1.18401	0.391	0.109	2.92e-78
SLC11A1	1.55e-71	1.05931	0.302	0.062	3.52e-67		CXCL9	4.97e-107	1.5512	0.427	0.083	1.13e-102		AIF1	4.80207e-76	1.06102	0.39	0.117	1.09213e-71		FGFBP1	1.28351e-39	1.59774	0.184	0.031	2.91909e-35		TIMP1	7.14e-30	0.6503	0.558	0.394	1.62e-25		FTL	3.61e-129	1.17822	0.977	0.849	8.2e-125
INHBA	7.54e-46	1.0403	0.231	0.062	1.72e-41		PSAP	5.43e-175	1.53834	0.791	0.34	1.23e-170		SLC11A1	2.4561e-71	1.05918	0.305	0.062	5.5859e-67		G0S2	3.73378e-93	1.58398	0.391	0.061	8.49175e-89		PSAP	4.8e-56	0.648333	0.642	0.429	1.09e-51		MS4A6A	1.11e-109	1.17168	0.526	0.159	2.53e-105
TNF	7.15e-44	1.03964	0.25	0.079	1.63e-39		CCL2	1.35e-94	1.53409	0.41	0.09	3.06e-90		ICAM1	1.02652e-93	1.03076	0.493	0.17	2.3346e-89		CCL7	2.56656e-51	1.57156	0.186	0.015	5.83713e-47		FCGR3A	2.72e-48	0.645778	0.311	0.139	6.19e-44		CD14	1.25e-118	1.16779	0.544	0.157	2.84e-114
GRN	1.45e-102	1.03334	0.536	0.206	3.29e-98		CCL18	8.74e-30	1.51824	0.122	0.017	1.99e-25		TGFBI	9.90649e-96	1.0306	0.424	0.11	2.25303e-91		ICAM1	8.40651e-166	1.55078	0.71	0.17	1.91189e-161		CD68	7.93e-61	0.643944	0.386	0.181	1.8e-56		CD68	9.63e-144	1.16745	0.61	0.181	2.19e-139
ICAM1	3.72e-92	1.02691	0.483	0.17	8.46e-88		ICAM1	8.59e-182	1.50915	0.675	0.17	1.95e-177		GRN	4.71658e-103	1.02844	0.545	0.206	1.07269e-98		THBS1	1.11862e-115	1.54799	0.565	0.142	2.54408e-111		MMP9	1.38e-48	0.638217	0.255	0.099	3.14e-44		SLC11A1	9.86e-116	1.1668	0.516	0.143	2.24e-111
LYZ	1.7e-71	1.00302	0.368	0.109	3.86e-67		C5AR1	9.1e-140	1.50737	0.467	0.066	2.07e-135		INHBA	3.38371e-47	1.01164	0.238	0.062	7.69558e-43		CXCL9	2.28734e-101	1.54368	0.45	0.083	5.2021e-97		CCL2	2.31e-40	0.636104	0.299	0.142	5.25e-36		SOD2	2.77e-143	1.15802	0.864	0.423	6.3e-139
C5AR1	2.33e-64	1.00244	0.285	0.066	5.31e-60		INHBA	1.56e-84	1.50312	0.34	0.062	3.55e-80		C5AR1	7.04078e-65	1.0064	0.289	0.066	1.60129e-60		AIF1	6.75584e-152	1.53158	0.623	0.117	1.53648e-147		FTL	7.04e-52	0.632075	0.922	0.849	1.6e-47		LAMC2	6.02e-52	1.14922	0.205	0.045	1.37e-47
IL6	5.64e-47	0.997761	0.212	0.048	1.28e-42		LYZ	5.65e-155	1.47838	0.57	0.109	1.29e-150		IL6	1.47721e-49	1.00333	0.221	0.048	3.35961e-45		INHBA	1.28893e-87	1.52913	0.375	0.062	2.93142e-83		THBS1	5.14e-47	0.62382	0.377	0.198	1.17e-42		HSPA1A	5.89e-93	1.14615	0.499	0.17	1.34e-88
TNFAIP2	7.92e-73	0.996163	0.392	0.13	1.8e-68		TNFAIP2	3.81e-143	1.46971	0.559	0.13	8.67e-139		CCL7	4.48792e-26	1.00081	0.104	0.015	1.02069e-21		TGFBI	6.14933e-170	1.52004	0.642	0.11	1.39854e-165		COL1A1	2.75e-20	0.618765	0.199	0.107	6.26e-16		MMP12	7.87e-37	1.13448	0.155	0.035	1.79e-32
SPI1	1.36e-69	0.980078	0.325	0.085	3.1e-65		GRN	1.61e-186	1.46384	0.706	0.206	3.67e-182		LYZ	2.08425e-71	0.995752	0.373	0.109	4.74022e-67		NAMPT	8.74996e-151	1.51952	0.814	0.324	1.99e-146		S100A2	5.12e-15	0.608234	0.282	0.192	1.16e-10		MAFB	6.12e-135	1.13262	0.558	0.153	1.39e-130
TGFBI	5.47e-90	0.975158	0.408	0.11	1.24e-85		NAMPT	5.35e-170	1.45934	0.784	0.324	1.22e-165		TNFAIP2	6.27958e-74	0.982045	0.399	0.13	1.42816e-69		C5AR1	2.61587e-133	1.51376	0.493	0.066	5.94926e-129		MAFB	1.81e-57	0.606462	0.346	0.153	4.11e-53		CXCL10	1.8e-114	1.11209	0.594	0.204	4.1e-110
NAMPT	4.47e-88	0.971121	0.631	0.324	1.02e-83		THBS1	9.3e-117	1.44679	0.522	0.142	2.11e-112		SPI1	5.23259e-69	0.982026	0.327	0.085	1.19005e-64		GRN	9.03163e-169	1.49829	0.741	0.206	2.05406e-164		CXCL9	4.44e-46	0.602598	0.304	0.135	1.01e-41		ICAM1	2.06e-133	1.10516	0.71	0.264	4.69e-129
MARCKS	9.51e-78	0.96532	0.506	0.215	2.16e-73		SPI1	1.65e-145	1.44115	0.507	0.085	3.76e-141		THBS1	2.88019e-59	0.981532	0.377	0.142	6.55042e-55		TNFAIP2	3.08539e-140	1.49491	0.606	0.13	7.0171e-136		CXCL8	1.28e-54	0.598465	0.424	0.22	2.9e-50		NAMPT	3.66e-114	1.10197	0.814	0.432	8.32e-110
THBS1	1.01e-55	0.958792	0.364	0.142	2.31e-51		IL6	4.02e-89	1.4296	0.326	0.048	9.13e-85		NAMPT	8.7209e-85	0.974533	0.632	0.324	1.98339e-80		IL6	2.27864e-89	1.48489	0.351	0.048	5.18232e-85		SLC11A1	1.24e-42	0.585309	0.305	0.143	2.81e-38		C5AR1	6.17e-111	1.08135	0.493	0.136	1.4e-106
CTSZ	5.11e-87	0.953696	0.535	0.232	1.16e-82		IL1RN	1.57e-115	1.42908	0.441	0.077	3.58e-111		COL1A1	1.93312e-21	0.969174	0.199	0.088	4.39649e-17		MMP9	3.59363e-109	1.48373	0.427	0.061	8.17299e-105		ICAM1	4.21e-61	0.585129	0.493	0.264	9.57e-57		IL6	4.51e-80	1.05934	0.351	0.09	1.03e-75
COL1A1	2.85e-19	0.946089	0.189	0.088	6.48e-15		MARCKS	4.9e-160	1.40504	0.693	0.215	1.11e-155		FGFBP1	9.86758e-18	0.966743	0.104	0.031	2.24418e-13		MAFB	1.81566e-156	1.48153	0.558	0.077	4.12936e-152		GBP1	3.43e-59	0.58307	0.587	0.367	7.8e-55		EREG	2.97e-83	1.05174	0.376	0.098	6.76e-79
IL1RN	6.43e-55	0.940177	0.282	0.077	1.46e-50		CCL7	1.51e-45	1.39897	0.161	0.015	3.43e-41		CTSZ	2.05624e-88	0.961115	0.544	0.232	4.6765e-84		KRT6A	6.44548e-29	1.47825	0.253	0.095	1.4659e-24		LAMA3	5.23e-24	0.577862	0.116	0.041	1.19e-19		S100A2	2.34e-30	1.04605	0.362	0.192	5.32e-26
CTSS	2.1e-65	0.939362	0.552	0.299	4.78e-61		MAFB	9.97e-163	1.39197	0.526	0.077	2.27e-158		MAFB	2.12054e-82	0.955378	0.346	0.077	4.82275e-78		LYZ	3.10303e-142	1.45442	0.596	0.109	7.05722e-138		IL6	4e-38	0.577784	0.221	0.09	9.11e-34		DSP	1e-41	1.04021	0.242	0.082	2.28e-37
PLA2G7	2e-65	0.935138	0.222	0.025	4.54e-61		TGFBI	5.08e-173	1.38755	0.596	0.11	1.15e-168		IL1RN	8.30092e-58	0.944872	0.293	0.077	1.88788e-53		SPI1	1.64122e-129	1.43879	0.517	0.085	3.73263e-125		WARS	3.8e-52	0.575945	0.488	0.286	8.65e-48		AIF1	6.02e-118	1.03953	0.623	0.207	1.37e-113
MAFB	5.3e-80	0.93391	0.337	0.077	1.21e-75		CTSS	9.3e-140	1.38736	0.707	0.299	2.12e-135		MARCKS	1.78591e-78	0.942739	0.515	0.215	4.0617e-74		EREG	4.5368e-96	1.42739	0.376	0.048	1.0318e-91		SOD2	8.47e-59	0.574197	0.648	0.423	1.93e-54		NLRP3	2.05e-85	1.03735	0.453	0.141	4.65e-81
COL1A2	2.44e-20	0.931944	0.192	0.087	5.55e-16		PLEK	9.12e-131	1.38729	0.52	0.114	2.08e-126		COL1A2	6.87615e-23	0.942275	0.202	0.087	1.56384e-18		PLA2G7	2.70965e-120	1.41151	0.382	0.025	6.16257e-116		C5AR1	4.45e-41	0.573996	0.289	0.136	1.01e-36		HBEGF	6.05e-106	1.03664	0.463	0.124	1.38e-101
FTH1	2.78e-60	0.9286	0.976	0.924	6.33e-56		HLA-DRB1	7.82e-139	1.38408	0.838	0.468	1.78e-134		CTSS	2.01876e-63	0.940299	0.553	0.299	4.59126e-59		IL1RN	1.4242e-112	1.41094	0.473	0.077	3.23907e-108		HBEGF	3.06e-47	0.569963	0.289	0.124	6.95e-43		LAMA3	5.85e-49	1.02987	0.191	0.041	1.33e-44
HLA-DRB1	4.09e-61	0.920929	0.696	0.468	9.31e-57		PTGS2	2.32e-121	1.37625	0.424	0.059	5.28e-117		FCGRT	1.17608e-77	0.922997	0.419	0.141	2.67475e-73		MARCKS	5.16013e-144	1.40861	0.729	0.215	1.17357e-139		AIF1	8.31e-45	0.56897	0.39	0.207	1.89e-40		GRN	6.67e-130	1.02535	0.741	0.309	1.52e-125
FCGRT	1.2e-76	0.914184	0.411	0.141	2.74e-72		CTSZ	1.21e-160	1.37411	0.69	0.232	2.75e-156		HLA-DRB1	7.31822e-59	0.918058	0.699	0.468	1.66438e-54		HSPA1A	9.31347e-103	1.40003	0.499	0.114	2.11816e-98		DSP	8.32e-25	0.568486	0.176	0.082	1.89e-20		TNFAIP2	1.91e-114	1.01748	0.606	0.21	4.34e-110
CLEC7A	7.65e-75	0.896026	0.311	0.068	1.74e-70		BCL2A1	5.17e-132	1.37027	0.619	0.194	1.18e-127		TIMP1	1.47575e-44	0.915842	0.558	0.323	3.35629e-40		CTSS	5.11008e-117	1.39389	0.72	0.299	1.16219e-112		COL1A2	1.94e-22	0.563599	0.202	0.104	4.42e-18		FGL2	3.88e-97	1.01414	0.466	0.137	8.81e-93
TYMP	7.8e-87	0.895959	0.731	0.462	1.77e-82		HLA-DRA	5.03e-149	1.369	0.821	0.392	1.14e-144		GBP1	4.37222e-85	0.913589	0.587	0.271	9.94374e-81		HLA-DRB1	5.4744e-117	1.39106	0.862	0.468	1.24504e-112		CTSZ	7.82e-59	0.563428	0.544	0.324	1.78e-54		C15orf48	8.87e-117	1.0133	0.595	0.187	2.02e-112
HLA-DRA	1e-65	0.894529	0.655	0.392	2.28e-61		FCGRT	1.37e-151	1.36853	0.582	0.141	3.13e-147		PLA2G7	1.58452e-65	0.912434	0.225	0.025	3.60367e-61		CTSZ	1.4327e-141	1.39083	0.72	0.232	3.2584e-137		FGL2	1.61e-42	0.559995	0.294	0.137	3.67e-38		IL1RN	9.44e-101	1.01282	0.473	0.13	2.15e-96
GBP1	1.69e-83	0.892796	0.579	0.271	3.85e-79		FTH1	6.76e-141	1.35695	0.991	0.924	1.54e-136		CLEC7A	2.64014e-77	0.90845	0.32	0.068	6.00447e-73		PLEK	2.38395e-124	1.38187	0.551	0.114	5.42182e-120		NAMPT	5.92e-47	0.556978	0.632	0.432	1.35e-42		SPI1	1.47e-99	1.0126	0.517	0.166	3.35e-95
LGMN	1.39e-82	0.891308	0.379	0.104	3.17e-78		EREG	2.31e-96	1.35587	0.35	0.048	5.25e-92		HSPA1A	2.60999e-59	0.907603	0.345	0.114	5.9359e-55		MXD1	3.4468e-121	1.38018	0.559	0.128	7.83906e-117		SPI1	3.06e-40	0.555839	0.327	0.166	6.97e-36		CLEC7A	1.33e-127	1.00783	0.528	0.138	3.02e-123
MXD1	6.39e-65	0.883641	0.37	0.128	1.45e-60		FGFBP1	1.56e-31	1.35239	0.15	0.031	3.56e-27		TYMP	1.10206e-87	0.904329	0.739	0.462	2.50643e-83		NLRP3	4.84601e-99	1.3716	0.453	0.085	1.10213e-94		GRN	2.63e-64	0.555497	0.545	0.309	5.97e-60		MXD1	6.59e-98	1.00208	0.559	0.202	1.5e-93
COL3A1	3.99e-16	0.877657	0.162	0.077	9.08e-12		MXD1	7.98e-135	1.34871	0.54	0.128	1.82e-130		LGMN	8.84429e-84	0.902981	0.387	0.104	2.01146e-79		CCL18	2.21383e-33	1.3702	0.139	0.017	5.03491e-29		CLEC7A	7.89e-54	0.553493	0.32	0.138	1.79e-49		FCGRT	6.6e-110	0.994348	0.605	0.224	1.5e-105
FGL2	1.72e-59	0.877248	0.287	0.076	3.92e-55		PLA2G7	6.1e-122	1.34453	0.362	0.025	1.39e-117		FGL2	2.94053e-61	0.893985	0.294	0.076	6.68765e-57		FCGRT	2.75473e-136	1.36815	0.605	0.141	6.26509e-132		FCGRT	9.25e-51	0.54919	0.419	0.224	2.1e-46		CTSZ	2.54e-112	0.993144	0.72	0.324	5.77e-108
PLEK	1.16e-59	0.876335	0.342	0.114	2.65e-55		TYMP	3.33e-178	1.33295	0.865	0.462	7.57e-174		FTH1	2.63597e-55	0.890945	0.975	0.924	5.99498e-51		CLEC7A	2.7301e-149	1.36278	0.528	0.068	6.20907e-145		LGMN	2.41e-54	0.54835	0.387	0.189	5.48e-50		LYZ	3.83e-114	0.991386	0.596	0.194	8.72e-110
TIMP1	3.95e-44	0.875034	0.552	0.323	8.99e-40		CLEC7A	2.01e-158	1.32951	0.503	0.068	4.56e-154		MXD1	9.17818e-66	0.885016	0.377	0.128	2.08739e-61		HBEGF	9.44526e-118	1.34976	0.463	0.07	2.14814e-113		IL1RN	2.34e-43	0.546753	0.293	0.13	5.33e-39		INHBA	5.15e-74	0.989921	0.375	0.111	1.17e-69
CD300E	1.31e-51	0.870235	0.208	0.037	2.97e-47		FGL2	4.9e-123	1.32345	0.447	0.076	1.11e-118		HBEGF	3.3957e-62	0.883085	0.289	0.07	7.72284e-58		FGL2	1.62423e-114	1.34813	0.466	0.076	3.69398e-110		GRINA	2.61e-68	0.544634	0.507	0.269	5.93e-64		CTSS	2.44e-89	0.986141	0.72	0.388	5.55e-85
BCL2A1	2.28e-58	0.867189	0.438	0.194	5.18e-54		MMP9	1.65e-103	1.29459	0.385	0.061	3.75e-99		HLA-DRA	1.05976e-63	0.880733	0.658	0.392	2.41021e-59		HLA-DRA	2.25738e-123	1.34756	0.844	0.392	5.13396e-119		TYMP	4.56e-57	0.538509	0.739	0.543	1.04e-52		GRINA	1.16e-138	0.982909	0.713	0.269	2.64e-134
CTSC	3.19e-64	0.865421	0.603	0.342	7.25e-60		CD300E	3.37e-104	1.29345	0.345	0.037	7.66e-100		CTSC	5.58981e-64	0.873527	0.608	0.342	1.27129e-59		BCL2A1	1.97547e-115	1.34605	0.641	0.194	4.49281e-111		SFN	3.8e-19	0.537427	0.162	0.081	8.64e-15		HLA-DRB1	8.23e-91	0.982767	0.862	0.546	1.87e-86
HSPA1A	6.57e-56	0.864462	0.333	0.114	1.49e-51		HBEGF	3.33e-117	1.29137	0.427	0.07	7.58e-113		COL3A1	5.13984e-18	0.868783	0.171	0.077	1.16895e-13		FTH1	1.54666e-110	1.34369	0.991	0.924	3.51756e-106		CAV1	8.62e-22	0.533153	0.242	0.142	1.96e-17		WARS	9.29e-102	0.978293	0.661	0.286	2.11e-97
HBEGF	5.29e-59	0.861502	0.278	0.07	1.2e-54		CCL4L2	1.74e-117	1.28981	0.586	0.197	3.96e-113		PLEK	5.01391e-60	0.865644	0.347	0.114	1.14031e-55		TYMP	1.70901e-149	1.33855	0.885	0.462	3.8868e-145		LYZ	9.74e-44	0.532716	0.373	0.194	2.22e-39		PLEK	4.23e-104	0.976452	0.551	0.187	9.62e-100
PTGS2	2.14e-58	0.860126	0.263	0.059	4.88e-54		GBP1	4.62e-152	1.28375	0.727	0.271	1.05e-147		CD300E	2.48115e-52	0.865015	0.212	0.037	5.64287e-48		PTGS2	2.45857e-114	1.32927	0.442	0.059	5.59153e-110		CTSS	2.46e-36	0.532549	0.553	0.388	5.59e-32		LGMN	9.56e-105	0.973366	0.554	0.189	2.17e-100
SPARC	1.3e-17	0.853137	0.215	0.113	2.96e-13		SAT1	2.03e-141	1.2814	0.972	0.81	4.62e-137		MMP9	8.68977e-54	0.860264	0.255	0.061	1.97631e-49		LGMN	1.15602e-134	1.328	0.554	0.104	2.62913e-130		CTSC	1.38e-40	0.522266	0.608	0.426	3.15e-36		TYMP	5.85e-119	0.972725	0.885	0.543	1.33e-114
SAT1	2.72e-64	0.849646	0.924	0.81	6.18e-60		NLRP3	4.47e-99	1.27236	0.419	0.085	1.02e-94		PTGS2	5.92958e-60	0.85908	0.27	0.059	1.34857e-55		KRT5	1.1526e-27	1.31752	0.259	0.103	2.62136e-23		COL17A1	6.74e-24	0.520225	0.105	0.033	1.53e-19		CCL4L2	1.32e-94	0.971317	0.628	0.262	3e-90
CAPG	3.05e-65	0.84904	0.49	0.226	6.93e-61		LGMN	5.94e-143	1.26935	0.524	0.104	1.35e-138		SPARC	5.25979e-20	0.858525	0.227	0.113	1.19623e-15		CCL4L2	1.27611e-112	1.31616	0.628	0.197	2.90225e-108		F3	3.47e-28	0.519991	0.22	0.109	7.89e-24		CXCL9	1.47e-87	0.969228	0.45	0.135	3.34e-83
EREG	2.59e-48	0.847882	0.22	0.048	5.89e-44		CYBB	1.85e-120	1.25335	0.463	0.088	4.2e-116		BCL2A1	5.54044e-57	0.856624	0.44	0.194	1.26006e-52		CYBB	4.78345e-113	1.28878	0.486	0.088	1.0879e-108		COL6A1	8.88e-15	0.518777	0.168	0.095	2.02e-10		F3	3.49e-50	0.966605	0.304	0.109	7.93e-46
IDO1	9.22e-58	0.839264	0.303	0.086	2.1e-53		CCL20	7.23e-85	1.24954	0.376	0.083	1.64e-80		KRT6A	9.04145e-11	0.847989	0.164	0.095	2.0563e-06		GBP1	4.08761e-128	1.28477	0.743	0.271	9.29645e-124		MT1E	9.22e-19	0.51055	0.363	0.253	2.1e-14		CYBB	4.83e-94	0.958296	0.486	0.154	1.1e-89
IL10	3.36e-32	0.831594	0.174	0.049	7.65e-28		KRT6A	2.96e-23	1.23914	0.218	0.095	6.72e-19		CAPG	4.23615e-65	0.844226	0.496	0.226	9.63427e-61		CD300E	1.70844e-98	1.27717	0.356	0.037	3.88549e-94		HLA-DRB1	1.87e-33	0.509765	0.699	0.546	4.25e-29		SFN	4.41e-39	0.956772	0.24	0.081	1e-34
C1orf162	5.08e-58	0.823091	0.322	0.101	1.15e-53		CTSC	2.72e-121	1.23607	0.734	0.342	6.19e-117		IDO1	4.27681e-59	0.843365	0.31	0.086	9.72676e-55		GRINA	1.12689e-161	1.2669	0.713	0.184	2.56288e-157		C15orf48	1.79e-45	0.508554	0.37	0.187	4.06e-41		PTGS2	3.1e-96	0.956767	0.442	0.119	7.05e-92
MMP9	3.17e-49	0.814049	0.241	0.061	7.2e-45		GRINA	5.43e-180	1.23415	0.683	0.184	1.24e-175		EREG	6.972e-50	0.843197	0.226	0.048	1.58564e-45		SAT1	3.82157e-107	1.26478	0.973	0.81	8.69139e-103		MXD1	2.72e-42	0.506913	0.377	0.202	6.18e-38		GBP1	5.03e-104	0.954253	0.743	0.367	1.14e-99
CYBB	2.99e-57	0.811261	0.3	0.088	6.79e-53		HSPA1A	8.26e-98	1.2266	0.451	0.114	1.88e-93		SAT1	3.99629e-60	0.842691	0.922	0.81	9.08876e-56		C1orf162	6.45625e-108	1.24594	0.497	0.101	1.46835e-103		SPARC	7.25e-20	0.506224	0.227	0.128	1.65e-15		BCL2A1	1.44e-89	0.945653	0.641	0.278	3.28e-85
GRINA	5.27e-90	0.806074	0.493	0.184	1.2e-85		C1orf162	1.28e-116	1.22059	0.476	0.101	2.91e-112		IL10	3.01556e-32	0.832793	0.176	0.049	6.85829e-28		IL10	8.05241e-61	1.22654	0.281	0.049	1.83136e-56		CCL13	1.3e-21	0.50603	0.105	0.037	2.97e-17		PLA2G7	1.35e-92	0.944904	0.382	0.091	3.06e-88
SERPING1	2.53e-80	0.804996	0.47	0.169	5.76e-76		IDO1	3.05e-108	1.21744	0.44	0.086	6.94e-104		GRINA	7.88472e-94	0.828624	0.507	0.184	1.79322e-89		TLR2	9.45139e-136	1.22428	0.486	0.06	2.14953e-131		TNFAIP2	6.67e-48	0.504613	0.399	0.21	1.52e-43		COL17A1	4.13e-56	0.942608	0.192	0.033	9.39e-52
ETS2	2.36e-76	0.799149	0.427	0.149	5.37e-72		IL10	1.02e-65	1.21025	0.275	0.049	2.33e-61		C1orf162	2.2558e-58	0.826216	0.326	0.101	5.13037e-54		CTSC	1.13142e-99	1.22157	0.748	0.342	2.57318e-95		MFAP5	1.3e-25	0.502999	0.119	0.04	2.96e-21		FN1	3.15e-38	0.940699	0.336	0.154	7.16e-34
CCL4L2	2.49e-50	0.798309	0.413	0.197	5.65e-46		IL1R2	8.75e-105	1.20493	0.424	0.082	1.99e-100		CYBB	3.85985e-58	0.817088	0.306	0.088	8.77845e-54		CXCL16	1.19024e-134	1.21013	0.531	0.087	2.70696e-130		SIGLEC1	3.51e-39	0.494635	0.228	0.093	7.98e-35		CCL13	9.33e-52	0.932002	0.191	0.037	2.12e-47
NLRP3	1.25e-44	0.79662	0.267	0.085	2.84e-40		HLA-DPA1	9.13e-124	1.19974	0.786	0.408	2.08e-119		SERPING1	2.35893e-83	0.808035	0.483	0.169	5.36492e-79		IL1R2	1.83443e-103	1.2059	0.458	0.082	4.17204e-99		STAB1	7.97e-36	0.494629	0.243	0.109	1.81e-31		MARCKS	2.26e-113	0.926073	0.729	0.302	5.14e-109
CXCL16	3.14e-74	0.790766	0.339	0.087	7.15e-70		CAPG	1.28e-124	1.19169	0.641	0.226	2.91e-120		NLRP3	2.38021e-45	0.798172	0.272	0.085	5.4133e-41		CCL20	2.92281e-92	1.20034	0.428	0.083	6.64735e-88		IDO1	1.38e-39	0.494609	0.31	0.15	3.13e-35		HLA-DRA	4.82e-94	0.924855	0.844	0.48	1.1e-89
IL1R2	3.67e-50	0.788852	0.276	0.082	8.35e-46		TLR2	2.51e-139	1.18683	0.456	0.06	5.71e-135		IL1R2	1.11437e-51	0.796921	0.283	0.082	2.53442e-47		ETS2	4.41208e-138	1.1994	0.637	0.149	1.00344e-133		MMP1	4.91e-19	0.489014	0.147	0.07	1.12e-14		CAV1	1.12e-29	0.910601	0.293	0.142	2.55e-25
TLR2	2.52e-70	0.784214	0.29	0.06	5.74e-66		CXCL16	2.65e-144	1.18663	0.507	0.087	6.02e-140		CCL4L2	6.59018e-51	0.795998	0.419	0.197	1.49881e-46		ACSL1	5.45423e-114	1.19316	0.482	0.087	1.24046e-109		ACTN1	1.26e-45	0.488626	0.358	0.184	2.87e-41		STAB1	6.92e-81	0.905049	0.387	0.109	1.57e-76
NFKBIA	5.65e-46	0.783896	0.83	0.686	1.28e-41		ACSL1	6.19e-122	1.18579	0.461	0.087	1.41e-117		CXCL16	1.96628e-75	0.789271	0.346	0.087	4.4719e-71		HLA-DPA1	1.14382e-101	1.1926	0.799	0.408	2.6014e-97		TNFSF10	6.22e-46	0.488183	0.43	0.245	1.41e-41		ABL2	2.16e-99	0.903519	0.537	0.184	4.92e-95
CST3	1.2e-91	0.773219	0.633	0.316	2.72e-87		ETS2	1.91e-150	1.18349	0.605	0.149	4.34e-146		TLR2	3.76804e-71	0.78669	0.295	0.06	8.56966e-67		NINJ1	1.00515e-110	1.19241	0.606	0.18	2.28602e-106		CYBB	3.87e-38	0.4866	0.306	0.154	8.8e-34		C1orf162	2.18e-87	0.902667	0.497	0.172	4.96e-83
MS4A4A	1.28e-56	0.772265	0.221	0.037	2.91e-52		NFKBIA	3e-100	1.18302	0.894	0.686	6.81e-96		KRT5	3.54912e-11	0.783613	0.175	0.103	8.07176e-07		CAPG	6.96906e-110	1.18039	0.667	0.226	1.58497e-105		PTGS2	1.58e-40	0.486573	0.27	0.119	3.59e-36		TLR2	5.49e-110	0.898444	0.486	0.132	1.25e-105
HLA-DPA1	6.45e-58	0.771214	0.649	0.408	1.47e-53		MS4A4A	4.17e-112	1.17734	0.363	0.037	9.49e-108		RAB31	3.92793e-88	0.780787	0.461	0.15	8.93329e-84		NFKBIA	4.80342e-81	1.18013	0.908	0.686	1.09244e-76		IL1R2	3.69e-36	0.483116	0.283	0.138	8.4e-32		IL1R2	6.85e-90	0.892099	0.458	0.138	1.56e-85
NINJ1	7.66e-68	0.77118	0.445	0.18	1.74e-63		FPR3	5.56e-117	1.17577	0.375	0.038	1.26e-112		SIGLEC1	9.62777e-61	0.780062	0.228	0.033	2.18964e-56		IDO1	8.18628e-96	1.17842	0.448	0.086	1.86181e-91		RAB31	3.41e-59	0.483004	0.461	0.238	7.75e-55		ACSL1	3.3e-94	0.890549	0.482	0.154	7.51e-90
RAB31	4.32e-86	0.770012	0.45	0.15	9.83e-82		NINJ1	6.21e-129	1.17408	0.593	0.18	1.41e-124		CST3	2.1427e-94	0.778484	0.646	0.316	4.87315e-90		SIGLEC1	1.02799e-116	1.17561	0.393	0.033	2.33795e-112		C1orf162	1.79e-37	0.482944	0.326	0.172	4.07e-33		SIGLEC1	2.18e-96	0.890181	0.393	0.093	4.95e-92
FPR3	1.42e-58	0.766502	0.228	0.038	3.23e-54		CST3	1.05e-186	1.15477	0.828	0.316	2.4e-182		ETS2	2.08908e-76	0.778163	0.434	0.149	4.7512e-72		CST3	4.12045e-166	1.16903	0.871	0.316	9.37113e-162		IL10	6.53e-20	0.480358	0.176	0.09	1.48e-15		CD300E	2.46e-80	0.888813	0.356	0.091	5.59e-76
SIGLEC1	8.42e-60	0.76536	0.223	0.033	1.92e-55		SIGLEC1	1.2e-118	1.15341	0.37	0.033	2.72e-114		NINJ1	3.88361e-67	0.776904	0.449	0.18	8.83249e-63		CCL13	2.46168e-53	1.16022	0.191	0.015	5.59859e-49		COL6A2	1.49e-16	0.480156	0.197	0.113	3.38e-12		MRC1	5.41e-82	0.888473	0.352	0.086	1.23e-77
MNDA	1.42e-49	0.75406	0.249	0.066	3.22e-45		TMEM176B	2.2e-94	1.14892	0.335	0.044	5e-90		NFKBIA	9.4638e-44	0.774158	0.83	0.686	2.15235e-39		SLCO2B1	5.96209e-102	1.15936	0.352	0.032	1.35596e-97		CD300E	2.05e-33	0.476654	0.212	0.091	4.65e-29		SAT1	1.48e-78	0.882474	0.973	0.854	3.37e-74
APOE	4.68e-30	0.75364	0.191	0.063	1.06e-25		SLCO2B1	1.04e-102	1.14692	0.331	0.032	2.36e-98		HLA-DPA1	8.68983e-56	0.769184	0.649	0.408	1.97633e-51		STAB1	3.98012e-94	1.1491	0.387	0.058	9.05198e-90		SERPING1	1.77e-58	0.473461	0.483	0.252	4.02e-54		NINJ1	6e-84	0.881144	0.606	0.268	1.36e-79
ACSL1	4.17e-60	0.751639	0.305	0.087	9.47e-56		STAB1	2.63e-100	1.14141	0.373	0.058	5.99e-96		FPR3	1.76105e-60	0.76877	0.235	0.038	4.00515e-56		FPR3	3.26492e-108	1.14714	0.382	0.038	7.4254e-104		TAGLN	1.04e-28	0.472561	0.213	0.101	2.37e-24		IL10	1.68e-48	0.874106	0.281	0.09	3.83e-44
CEBPD	2.76e-63	0.749613	0.454	0.192	6.29e-59		KRT5	2.34e-21	1.14095	0.22	0.103	5.32e-17		MS4A4A	4.09061e-57	0.766029	0.225	0.037	9.30329e-53		ABL2	2.75524e-118	1.14655	0.537	0.115	6.26625e-114		INHBA	1.55e-32	0.472427	0.238	0.111	3.52e-28		CXCL16	1.03e-107	0.871066	0.531	0.164	2.35e-103
CCL20	3.61e-39	0.748642	0.245	0.083	8.2e-35		MNDA	1.64e-100	1.13723	0.388	0.066	3.73e-96		TNFSF10	2.39158e-63	0.760057	0.43	0.173	5.43918e-59		CEBPD	5.67624e-115	1.14031	0.65	0.192	1.29095e-110		PLD3	5.67e-50	0.470107	0.378	0.189	1.29e-45		CTSC	1.84e-76	0.870305	0.748	0.426	4.2e-72
PMP22	4.35e-66	0.746621	0.335	0.099	9.88e-62		LST1	2.26e-117	1.12581	0.441	0.076	5.15e-113		COL6A1	1.60101e-17	0.759134	0.168	0.075	3.64118e-13		TMEM176B	5.03831e-88	1.13984	0.344	0.044	1.14586e-83		CAPG	2.57e-40	0.467668	0.496	0.309	5.85e-36		MFAP5	8.26e-47	0.862444	0.185	0.04	1.88e-42
TMEM176B	7.8e-49	0.744865	0.213	0.044	1.77e-44		RAB31	1e-160	1.11835	0.626	0.15	2.28e-156		ACSL1	4.22299e-61	0.757063	0.311	0.087	9.60434e-57		MS4A4A	1.47299e-106	1.13754	0.376	0.037	3.35002e-102		EREG	6.3e-35	0.467551	0.226	0.098	1.43e-30		HLA-DPA1	7.83e-79	0.861798	0.799	0.496	1.78e-74
TNFSF10	2.64e-61	0.744006	0.421	0.173	6e-57		IFIT2	3.85e-77	1.11566	0.417	0.122	8.75e-73		APOE	1.59335e-30	0.752009	0.194	0.063	3.62375e-26		RAB31	5.79405e-146	1.13603	0.657	0.15	1.31774e-141		COL3A1	3.03e-17	0.467296	0.171	0.092	6.88e-13		CST3	8.69e-135	0.855615	0.871	0.406	1.98e-130
SLCO2B1	4.74e-51	0.739151	0.198	0.032	1.08e-46		TNFSF13B	2.46e-138	1.11204	0.541	0.117	5.59e-134		MNDA	2.73888e-50	0.750908	0.254	0.066	6.22904e-46		MRC1	3.26887e-92	1.13277	0.352	0.041	7.43438e-88		CD63	4.5e-44	0.466404	0.639	0.452	1.02e-39		TNFSF13	1.87e-97	0.849661	0.419	0.109	4.24e-93
TNFSF13B	7.87e-71	0.736972	0.375	0.117	1.79e-66		BRI3	5.62e-148	1.10055	0.752	0.31	1.28e-143		TMEM176B	4.44849e-49	0.746258	0.216	0.044	1.01172e-44		TNFSF13B	1.20409e-127	1.12166	0.569	0.117	2.73847e-123		NINJ1	2.85e-40	0.465643	0.449	0.268	6.49e-36		LAMB3	1.23e-53	0.847241	0.227	0.055	2.8e-49
COL6A1	2.41e-16	0.732963	0.162	0.075	5.48e-12		ATP6V1B2	3.28e-135	1.08968	0.552	0.133	7.45e-131		PLD3	2.6211e-70	0.745029	0.378	0.121	5.96117e-66		APOE	1.41903e-50	1.11641	0.279	0.063	3.22731e-46		CST3	6.47e-65	0.465072	0.646	0.406	1.47e-60		FTH1	1.74e-79	0.84385	0.991	0.944	3.95e-75
PLD3	1.03e-67	0.732305	0.367	0.121	2.34e-63		SERPING1	1.02e-148	1.08408	0.644	0.169	2.33e-144		CEBPD	3.70965e-66	0.744143	0.467	0.192	8.43686e-62		TNFSF10	1.66164e-96	1.10838	0.566	0.173	3.77907e-92		LAMB3	6.99e-26	0.464293	0.141	0.055	1.59e-21		RAB31	9.84e-116	0.83825	0.657	0.238	2.24e-111
VAMP5	3.63e-56	0.730683	0.507	0.266	8.25e-52		PMP22	4.37e-119	1.08099	0.472	0.099	9.95e-115		TNFSF13B	6.8181e-72	0.741946	0.382	0.117	1.55064e-67		PLD3	1.18121e-110	1.10818	0.523	0.121	2.68642e-106		NLRP3	1.09e-29	0.463924	0.272	0.141	2.47e-25		TNFSF10	1.29e-79	0.836507	0.566	0.245	2.93e-75
ATP6V1B2	3.83e-73	0.72657	0.399	0.133	8.71e-69		ABL2	4.61e-118	1.0791	0.493	0.115	1.05e-113		COL6A2	5.31304e-18	0.739637	0.197	0.095	1.20834e-13		TNFSF13	6.93627e-111	1.1055	0.419	0.055	1.57751e-106		TLR2	8.03e-45	0.460857	0.295	0.132	1.83e-40		SLCO2B1	2.62e-84	0.834365	0.352	0.084	5.95e-80
KRT6A	3.37e-08	0.726143	0.151	0.095	0.000765451		TNFSF10	5.09e-104	1.07663	0.539	0.173	1.16e-99		STAB1	7.39591e-51	0.738679	0.243	0.058	1.68205e-46		BRI3	9.97359e-129	1.10479	0.779	0.31	2.26829e-124		SAT1	1.81e-31	0.460387	0.922	0.854	4.12e-27		PLD3	9.77e-91	0.833262	0.523	0.189	2.22e-86
BRI3	4.96e-78	0.72285	0.605	0.31	1.13e-73		PLD3	8.22e-119	1.07271	0.499	0.121	1.87e-114		CCL13	8.90958e-27	0.734244	0.105	0.015	2.02631e-22		WARS	2.7998e-108	1.10117	0.661	0.218	6.36758e-104		PLEK	3.27e-38	0.460222	0.347	0.187	7.43e-34		TMEM176B	5.23e-70	0.830387	0.344	0.099	1.19e-65
COL6A2	2.57e-16	0.722642	0.189	0.095	5.83e-12		APOE	6.54e-51	1.0709	0.261	0.063	1.49e-46		SLCO2B1	8.59066e-52	0.733123	0.202	0.032	1.95377e-47		SERPING1	7.123e-141	1.09928	0.692	0.169	1.61998e-136		MARCKS	1.86e-49	0.460198	0.515	0.302	4.22e-45		IDO1	2.67e-75	0.82966	0.448	0.15	6.08e-71
STAB1	2.95e-49	0.716755	0.236	0.058	6.72e-45		CEBPD	4.23e-120	1.06844	0.608	0.192	9.61e-116		VAMP5	3.07512e-56	0.732001	0.512	0.266	6.99374e-52		MNDA	8.85715e-92	1.09636	0.397	0.066	2.01438e-87		HLA-DRA	6.2e-36	0.458024	0.658	0.48	1.41e-31		FPR3	7.33e-91	0.829406	0.382	0.093	1.67e-86
LST1	9.33e-56	0.713628	0.281	0.076	2.12e-51		MRC1	9.58e-93	1.06501	0.33	0.041	2.18e-88		ATP6V1B2	1.26428e-75	0.731482	0.411	0.133	2.87536e-71		LAPTM5	7.24888e-64	1.08827	0.695	0.439	1.64861e-59		BCL2A1	2.35e-32	0.45623	0.44	0.278	5.35e-28		IFIT3	3.66e-82	0.828925	0.636	0.285	8.32e-78
CD63	1.07e-67	0.708734	0.634	0.366	2.44e-63		NPC2	3.46e-144	1.06009	0.759	0.323	7.88e-140		BRI3	2.16174e-79	0.72999	0.613	0.31	4.91643e-75		KRT14	1.46793e-26	1.08601	0.304	0.137	3.33851e-22		ACSL1	4.2e-40	0.454452	0.311	0.154	9.55e-36		TNFSF13B	8.03e-103	0.824941	0.569	0.196	1.83e-98
CCL13	2.58e-25	0.707803	0.1	0.015	5.88e-21		HLA-DPB1	3.54e-104	1.0553	0.768	0.405	8.06e-100		PMP22	6.04554e-65	0.72632	0.337	0.099	1.37494e-60		PMP22	1.19224e-107	1.07791	0.486	0.099	2.71152e-103		MMP14	4.88e-57	0.454395	0.373	0.169	1.11e-52		NFKBIA	2.36e-60	0.82397	0.908	0.736	5.37e-56
MMP14	8.43e-73	0.707429	0.36	0.101	1.92e-68		LAPTM5	2.55e-78	1.05218	0.687	0.439	5.79e-74		CD63	8.95803e-68	0.72396	0.639	0.366	2.03732e-63		NPC2	3.02595e-128	1.07411	0.793	0.323	6.88191e-124		IFITM3	1.83e-49	0.453567	0.75	0.569	4.17e-45		LUCAT1	8.92e-56	0.823512	0.288	0.085	2.03e-51
IFITM3	3.79e-73	0.694867	0.746	0.484	8.63e-69		CCL13	5.1e-48	1.05096	0.167	0.015	1.16e-43		FN1	5.37058e-24	0.719663	0.256	0.126	1.22143e-19		ATP6V1B2	1.2985e-122	1.07351	0.575	0.133	2.95317e-118		CCL4L2	4.39e-33	0.451156	0.419	0.262	9.99e-29		BRI3	1.28e-104	0.82021	0.779	0.4	2.9e-100
HES4	5.53e-62	0.69384	0.441	0.182	1.26e-57		CTSH	6.13e-123	1.04374	0.51	0.118	1.39e-118		MMP14	1.54654e-76	0.719453	0.373	0.101	3.5173e-72		IFIT2	1.80177e-71	1.07039	0.437	0.122	4.09777e-67		FPR3	4.71e-42	0.451034	0.235	0.093	1.07e-37		IFIT2	5.04e-55	0.819519	0.437	0.183	1.15e-50
NPC2	2.54e-71	0.690872	0.6	0.323	5.77e-67		HLA-DQB1	5.89e-104	1.03873	0.766	0.405	1.34e-99		LST1	1.7628e-55	0.708842	0.284	0.076	4.00914e-51		CTSH	4.49634e-113	1.06967	0.533	0.118	1.0226e-108		CXCL16	1.2e-48	0.450203	0.346	0.164	2.73e-44		CTSH	4.44e-94	0.814834	0.533	0.187	1.01e-89
LAPTM5	1.26e-35	0.688393	0.597	0.439	2.88e-31		ANXA5	1.28e-143	1.03868	0.813	0.417	2.91e-139		IFITM3	1.72285e-73	0.708567	0.75	0.484	3.91828e-69		LAMC2	1.26317e-37	1.0673	0.205	0.045	2.87284e-33		ABL2	9.8e-43	0.449623	0.356	0.184	2.23e-38		ANXA2	4.03e-99	0.813921	0.833	0.514	9.17e-95
CEBPB	1.1e-56	0.685251	0.565	0.305	2.51e-52		VAMP5	1.14e-96	1.03597	0.617	0.266	2.6e-92		CCL20	2.37132e-40	0.701807	0.251	0.083	5.39309e-36		HLA-DPB1	9.90367e-87	1.06464	0.786	0.405	2.25239e-82		PLA2G7	3.18e-38	0.445831	0.225	0.091	7.22e-34		CEBPD	1.03e-96	0.811571	0.65	0.26	2.34e-92
IFIT2	3.06e-41	0.682248	0.305	0.122	6.96e-37		TNFSF13	6.35e-109	1.0348	0.385	0.055	1.45e-104		WARS	1.4713e-62	0.69882	0.488	0.218	3.34618e-58		CEBPB	5.78802e-98	1.06392	0.735	0.305	1.31637e-93		BRI3	5.71e-54	0.445408	0.613	0.4	1.3e-49		LAPTM5	1.32e-48	0.809627	0.695	0.504	2.99e-44
TMEM176A	3.02e-46	0.681706	0.2	0.04	6.88e-42		LILRB2	9.63e-106	1.03241	0.36	0.043	2.19e-101		IFIT2	5.76994e-41	0.695272	0.307	0.122	1.31226e-36		LST1	4.87101e-104	1.05935	0.448	0.076	1.10781e-99		TNFSF13B	3.58e-47	0.445225	0.382	0.196	8.14e-43		ETS2	1.28e-105	0.808173	0.637	0.236	2.91e-101
LILRB2	8.44e-53	0.678807	0.222	0.043	1.92e-48		SNX10	3.67e-111	1.03154	0.502	0.129	8.34e-107		ABL2	3.3394e-63	0.692656	0.356	0.115	7.59481e-59		ANXA5	6.93502e-124	1.04926	0.84	0.417	1.57723e-119		IFIT2	3.87e-25	0.444397	0.307	0.183	8.81e-21		ACTN1	7.09e-81	0.804292	0.491	0.184	1.61e-76
ABL2	8.54e-62	0.677396	0.348	0.115	1.94e-57		SERPINA1	5.46e-110	1.02534	0.392	0.054	1.24e-105		NPC2	2.6356e-72	0.691725	0.609	0.323	5.99415e-68		C3AR1	3.89361e-98	1.04288	0.387	0.054	8.85524e-94		ANXA2	1.43e-49	0.443738	0.692	0.514	3.26e-45		CAPG	6.72e-84	0.803836	0.667	0.309	1.53e-79
LGALS1	2.4e-65	0.677355	0.714	0.464	5.45e-61		MMP14	1.24e-129	1.02422	0.506	0.101	2.81e-125		LAPTM5	1.56281e-33	0.691363	0.593	0.439	3.5543e-29		MMP14	5.76229e-124	1.03911	0.539	0.101	1.31052e-119		ATP6V1B2	1.13e-52	0.439565	0.411	0.208	2.57e-48		MS4A4A	1.63e-85	0.795784	0.376	0.097	3.71e-81
RNF130	2.82e-66	0.67432	0.402	0.146	6.42e-62		HLA-DQA1	2.06e-99	1.02323	0.682	0.301	4.69e-95		LGALS1	5.83933e-65	0.689449	0.718	0.464	1.32804e-60		SERPINA1	2.80382e-105	1.0332	0.411	0.054	6.37672e-101		MRC1	6.39e-33	0.438764	0.205	0.086	1.45e-28		APOE	3.16e-40	0.795185	0.279	0.102	7.19e-36
TNFSF13	2.29e-54	0.673688	0.243	0.055	5.21e-50		KCTD12	2.66e-126	1.019	0.447	0.071	6.05e-122		TMEM176A	8.95532e-48	0.689126	0.206	0.04	2.03671e-43		LAMA3	1.60883e-37	1.03232	0.191	0.038	3.65897e-33		LGALS1	9.28e-42	0.438506	0.718	0.547	2.11e-37		NPC2	2.98e-104	0.789119	0.793	0.407	6.77e-100
HLA-DPB1	3.42e-48	0.672584	0.638	0.405	7.77e-44		AC015912.3	3.04e-86	1.0161	0.383	0.084	6.91e-82		LILRB2	2.21487e-53	0.685602	0.225	0.043	5.03729e-49		NFKBIZ	6.96758e-77	1.03065	0.771	0.437	1.58464e-72		HLA-DPA1	2.64e-32	0.438382	0.649	0.496	6.01e-28		ATP6V1B2	9.78e-100	0.781588	0.575	0.208	2.22e-95
LUM	1.09e-13	0.670273	0.117	0.049	2.48e-09		C3AR1	4.92e-107	1.01551	0.38	0.054	1.12e-102		TNFSF13	3.51105e-56	0.683132	0.251	0.055	7.98518e-52		IFIT3	1.08078e-96	1.02978	0.636	0.214	2.45802e-92		IFIT3	2.57e-38	0.438105	0.466	0.285	5.84e-34		ITGA6	5.6e-19	0.779811	0.22	0.116	1.27e-14
MRC1	9.57e-45	0.669716	0.199	0.041	2.18e-40		NFKBIZ	1.9e-90	1.01055	0.748	0.437	4.33e-86		MRC1	2.79658e-46	0.683065	0.205	0.041	6.36027e-42		LILRB2	8.32683e-101	1.0296	0.375	0.043	1.89377e-96		TMEM176B	1.06e-30	0.436801	0.216	0.099	2.42e-26		ANXA5	1.9e-99	0.779187	0.84	0.497	4.32e-95
KRT5	1.85e-08	0.666889	0.162	0.103	0.000420852		TMEM176A	1.5e-86	1.01029	0.311	0.04	3.41e-82		CEBPB	4.40259e-57	0.681812	0.572	0.305	1.00128e-52		LUCAT1	3.20339e-66	1.02278	0.288	0.045	7.28547e-62		S100A11	1.84e-59	0.431603	0.839	0.708	4.19e-55		CD9	5.44e-79	0.779168	0.514	0.199	1.24e-74
ANXA5	8.25e-66	0.666704	0.664	0.417	1.88e-61		LILRB4	2.3e-100	1.00533	0.354	0.045	5.23e-96		HES4	6.18793e-63	0.677839	0.449	0.182	1.40732e-58		LILRB4	7.30881e-95	1.02035	0.366	0.045	1.66224e-90		APOE	2.8e-20	0.430781	0.194	0.102	6.36e-16		HLA-DPB1	1.4e-67	0.776678	0.786	0.485	3.19e-63
PLAU	5.12e-63	0.662603	0.298	0.075	1.16e-58		CEBPB	5.25e-108	1.00451	0.704	0.305	1.19e-103		RNF130	3.17531e-67	0.67189	0.41	0.146	7.2216e-63		TMEM176A	2.23379e-86	1.0196	0.333	0.04	5.0803e-82		VAMP5	3.4e-36	0.429181	0.512	0.344	7.72e-32		CCL20	1.43e-81	0.775329	0.428	0.128	3.25e-77
LAIR1	2.41e-46	0.661195	0.257	0.078	5.49e-42		LAIR1	3.75e-93	1.00037	0.387	0.078	8.54e-89		ANXA5	1.59527e-65	0.669011	0.668	0.417	3.62813e-61		HLA-DQB1	8.46015e-83	1.01548	0.775	0.405	1.92409e-78		TNFSF13	1.43e-39	0.427296	0.251	0.109	3.25e-35		MMP14	1.96e-104	0.774054	0.539	0.169	4.47e-100
GADD45B	2.96e-54	0.657255	0.53	0.273	6.73e-50		RGL1	1.59e-102	0.99435	0.357	0.047	3.61e-98		HLA-DPB1	6.92579e-47	0.668621	0.64	0.405	1.57513e-42		LAIR1	3.66577e-85	1.01433	0.398	0.078	8.33706e-81		CD9	1.21e-36	0.425812	0.357	0.199	2.75e-32		MMP1	2.94e-41	0.773773	0.228	0.07	6.68e-37
ZFAND5	6.88e-41	0.654987	0.628	0.416	1.57e-36		LUCAT1	2e-67	0.992304	0.272	0.045	4.54e-63		PLAU	6.77131e-66	0.66291	0.309	0.075	1.54e-61		KCTD12	1.72537e-121	1.01352	0.475	0.071	3.92401e-117		MNDA	1.41e-32	0.425709	0.254	0.123	3.2e-28		CEBPB	2.88e-78	0.771191	0.735	0.386	6.55e-74
HLA-DQB1	1.79e-46	0.654082	0.626	0.405	4.07e-42		RNF130	1.13e-121	0.991598	0.547	0.146	2.57e-117		GADD45B	1.98659e-53	0.66083	0.533	0.273	4.5181e-49		DUSP1	2.96043e-85	1.01266	0.889	0.625	6.7329e-81		LUCAT1	3.01e-22	0.424729	0.175	0.085	6.85e-18		MNDA	5.31e-74	0.771162	0.397	0.123	1.21e-69
ISG15	1.7e-42	0.651156	0.837	0.662	3.86e-38		DMXL2	8.47e-111	0.989509	0.359	0.037	1.93e-106		CTSH	5.72916e-59	0.655488	0.35	0.118	1.30298e-54		CD63	1.21935e-108	1.01	0.806	0.366	2.77318e-104		TMEM176A	1.87e-33	0.424565	0.206	0.086	4.26e-29		C3AR1	8.33e-77	0.768365	0.387	0.116	1.89e-72
CTSH	5.49e-58	0.650088	0.343	0.118	1.25e-53		PLAU	3.5e-111	0.984057	0.427	0.075	7.96e-107		DCN	8.5278e-14	0.654366	0.133	0.06	1.93948e-09		DSP	8.0342e-34	1.00995	0.242	0.076	1.82722e-29		MS4A4A	9.03e-36	0.424271	0.225	0.097	2.05e-31		LILRB4	8.48e-77	0.767017	0.366	0.103	1.93e-72
KCTD12	3.15e-65	0.649156	0.295	0.071	7.17e-61		DUSP1	2.19e-100	0.981737	0.871	0.625	4.97e-96		LAIR1	5.94639e-46	0.653769	0.259	0.078	1.35239e-41		AC015912.3	8.43938e-86	1.00749	0.412	0.084	1.91937e-81		TIMP3	1.92e-27	0.423892	0.176	0.077	4.37e-23		LILRB2	5.02e-82	0.764849	0.375	0.1	1.14e-77
SNX10	7.02e-57	0.64741	0.357	0.129	1.6e-52		GADD45B	6.29e-102	0.980544	0.667	0.273	1.43e-97		ISG15	1.56885e-40	0.653579	0.835	0.662	3.56805e-36		F3	1.80073e-46	1.00732	0.304	0.09	4.09541e-42		LILRB2	5.31e-34	0.420848	0.225	0.1	1.21e-29		SERPING1	2.5e-114	0.764708	0.692	0.252	5.69e-110
SERPINA1	1.96e-53	0.64483	0.243	0.054	4.46e-49		WARS	3.73e-110	0.979362	0.617	0.218	8.48e-106		DUSP1	5.08401e-48	0.647081	0.798	0.625	1.15626e-43		GADD45B	4.74367e-93	1.00598	0.699	0.273	1.07885e-88		HSPA6	4.2e-29	0.419534	0.173	0.07	9.56e-25		VEGFA	2.32e-97	0.76403	0.473	0.14	5.28e-93
DCN	7.3e-13	0.643865	0.128	0.06	1.66e-08		CD63	8.43e-122	0.972785	0.772	0.366	1.92e-117		ZFAND5	7.49463e-39	0.645892	0.627	0.416	1.7045e-34		DMXL2	2.50086e-109	1.00403	0.381	0.037	5.68771e-105		MT2A	9.08e-30	0.418593	0.866	0.788	2.07e-25		DUSP1	8.11e-68	0.75904	0.889	0.678	1.84e-63
WARS	1.32e-58	0.643426	0.475	0.218	3.01e-54		IFIT3	2.1e-98	0.971118	0.592	0.214	4.77e-94		HLA-DQB1	4.57635e-45	0.639602	0.629	0.405	1.0408e-40		VAMP5	3.17094e-79	1.00242	0.624	0.266	7.21166e-75		NFKBIA	6.02e-24	0.417999	0.83	0.736	1.37e-19		DSE	6.1e-103	0.757916	0.526	0.165	1.39e-98
DUSP1	2.07e-48	0.642606	0.794	0.625	4.7e-44		CD86	1.76e-104	0.969456	0.401	0.068	4e-100		IFIT3	4.91035e-54	0.638957	0.466	0.214	1.11676e-49		HLA-DQA1	1.98108e-83	1.00002	0.701	0.301	4.50557e-79		CEBPD	8.47e-48	0.415405	0.467	0.26	1.93e-43		S100A11	1.36e-119	0.757292	0.938	0.708	3.1e-115
FN1	7.49e-22	0.641549	0.247	0.126	1.7e-17		VEGFA	1.02e-113	0.965442	0.442	0.083	2.32e-109		KCTD12	9.16787e-68	0.637338	0.305	0.071	2.08505e-63		FN1	3.76703e-39	0.998614	0.336	0.126	8.56735e-35		COL6A3	2.38e-13	0.415162	0.161	0.094	5.41e-09		NFKBIZ	5.17e-58	0.757066	0.771	0.511	1.18e-53
RGL1	4.16e-54	0.641523	0.231	0.047	9.46e-50		HES4	1.18e-99	0.96006	0.557	0.182	2.67e-95		LUM	2.40574e-14	0.636278	0.12	0.049	5.47138e-10		DSE	1.7418e-122	0.992024	0.526	0.098	3.96138e-118		DCN	9.77e-12	0.414842	0.133	0.075	2.22e-07		TMEM176A	3.14e-73	0.755038	0.333	0.086	7.15e-69
NFKBIZ	6.03e-45	0.640207	0.648	0.437	1.37e-40		GBP5	3.96e-90	0.959756	0.573	0.219	9e-86		NFKBIZ	4.28505e-43	0.635869	0.649	0.437	9.74548e-39		VEGFA	5.2043e-111	0.987553	0.473	0.083	1.18361e-106		RSAD2	8.78e-19	0.414832	0.322	0.207	2e-14		CD63	4.99e-84	0.752442	0.806	0.452	1.14e-79
C3AR1	3.96e-53	0.634743	0.239	0.054	9e-49		SOCS3	2.15e-98	0.959407	0.649	0.273	4.88e-94		SOCS3	1.68316e-50	0.635341	0.519	0.273	3.828e-46		RNF130	4.30914e-112	0.986799	0.575	0.146	9.80027e-108		LAPTM5	2.06e-18	0.412717	0.593	0.504	4.69e-14		MT1E	4.84e-28	0.752424	0.429	0.253	1.1e-23
SOCS3	3e-51	0.631498	0.516	0.273	6.83e-47		ZFAND5	3.94e-74	0.953661	0.721	0.416	8.97e-70		GBP5	2.45023e-45	0.633995	0.444	0.219	5.57256e-41		TIMP1	2.07926e-66	0.984107	0.694	0.323	4.72887e-62		GBP5	6.88e-31	0.41268	0.444	0.283	1.57e-26		MT2A	6.5e-64	0.752002	0.933	0.788	1.48e-59
AC015912.3	2.77e-45	0.630457	0.265	0.084	6.29e-41		S100A11	9.17e-165	0.951464	0.921	0.643	2.09e-160		DSE	5.08724e-67	0.633778	0.344	0.098	1.15699e-62		SNX10	2.43061e-96	0.975998	0.513	0.129	5.52794e-92		FCGR1A	3.62e-36	0.411882	0.185	0.068	8.24e-32		ATP1B3	3.65e-77	0.751863	0.747	0.417	8.29e-73
CD86	8.08e-54	0.629981	0.264	0.068	1.84e-49		DSE	2.49e-125	0.950051	0.489	0.098	5.67e-121		LGALS3BP	7.67689e-57	0.632903	0.383	0.144	1.74596e-52		ANXA2	1.1262e-112	0.974054	0.833	0.431	2.56132e-108		SLCO2B1	8.35e-33	0.40813	0.202	0.084	1.9e-28		LST1	8.56e-81	0.74976	0.448	0.145	1.95e-76
LILRB4	4.29e-49	0.625202	0.217	0.045	9.76e-45		TIMP1	3.35e-79	0.941814	0.678	0.323	7.61e-75		SERPINA1	2.94894e-53	0.631997	0.245	0.054	6.70678e-49		FPR1	2.64398e-95	0.970512	0.37	0.045	6.01321e-91		NPC2	5.27e-48	0.406733	0.609	0.407	1.2e-43		APLP2	1.1e-97	0.748978	0.609	0.24	2.51e-93
DMXL2	2.91e-57	0.625132	0.223	0.037	6.62e-53		ISG15	3.38e-75	0.937686	0.896	0.662	7.68e-71		C3AR1	4.42342e-53	0.628925	0.242	0.054	1.00602e-48		CD86	1.01928e-98	0.968699	0.42	0.068	2.31815e-94		SECTM1	3.8e-46	0.405964	0.293	0.129	8.63e-42		SCD	1.8e-43	0.747499	0.167	0.034	4.1e-39
DSE	6.78e-65	0.624645	0.335	0.098	1.54e-60		VMO1	1.08e-74	0.928639	0.255	0.025	2.46e-70		LILRB4	4.28956e-49	0.626451	0.219	0.045	9.75574e-45		GBP5	1.43558e-77	0.967402	0.59	0.219	3.26493e-73		IGFBP7	8.72e-21	0.405679	0.257	0.149	1.98e-16		CCL18	2.76e-30	0.747443	0.139	0.035	6.28e-26
LGALS3BP	2.23e-53	0.624527	0.369	0.144	5.06e-49		CCRL2	1.18e-86	0.92597	0.346	0.059	2.68e-82		LUCAT1	6.32566e-34	0.623997	0.175	0.045	1.43864e-29		ASAH1	6.95097e-107	0.967041	0.6	0.172	1.58086e-102		RAC1	4.49e-51	0.4053	0.684	0.491	1.02e-46		GBP5	4.68e-63	0.746087	0.59	0.283	1.06e-58
ASAH1	2.07e-67	0.621029	0.44	0.172	4.72e-63		KRT14	2.47e-21	0.925768	0.267	0.137	5.61e-17		RGL1	2.58219e-53	0.623159	0.231	0.047	5.87267e-49		SOCS3	2.9349e-85	0.962662	0.671	0.273	6.67484e-81		ITGA6	8.7e-10	0.40197	0.171	0.116	1.98e-05		GADD45B	2.41e-71	0.743384	0.699	0.358	5.47e-67
GBP5	1.87e-44	0.620404	0.436	0.219	4.24e-40		IFITM3	4.2e-140	0.923313	0.891	0.484	9.55e-136		MT2A	4.62456e-42	0.62293	0.866	0.744	1.05176e-37		PLAU	3.00411e-109	0.961781	0.459	0.075	6.83224e-105		CTSH	5.02e-39	0.40065	0.35	0.187	1.14e-34		FCGR1A	7.1e-81	0.737712	0.314	0.068	1.61e-76
IFIT3	1.72e-52	0.617594	0.457	0.214	3.91e-48		FPR1	3.49e-96	0.921616	0.347	0.045	7.94e-92		CD86	4.45482e-54	0.622112	0.268	0.068	1.01316e-49		MT2A	3.71042e-75	0.956338	0.933	0.744	8.43861e-71		DSE	2.02e-46	0.399669	0.344	0.165	4.58e-42		SERPINA1	2.44e-83	0.737513	0.411	0.118	5.55e-79
HLA-DQA1	6.51e-44	0.611853	0.527	0.301	1.48e-39		KLF4	2.89e-99	0.919511	0.443	0.103	6.58e-95		SNX10	1.74472e-56	0.621644	0.361	0.129	3.96802e-52		KLF4	8.98281e-94	0.954763	0.467	0.103	2.04296e-89		LST1	4.62e-33	0.399252	0.284	0.145	1.05e-28		LCP2	9.7e-57	0.735672	0.538	0.27	2.2e-52
VMO1	6.46e-40	0.609284	0.158	0.025	1.47e-35		S100A9	5.65e-160	0.916878	0.65	0.161	1.28e-155		ASAH1	2.07245e-68	0.621045	0.449	0.172	4.71338e-64		RGL1	6.60876e-92	0.954337	0.359	0.047	1.50303e-87		ANXA5	3.14e-41	0.398934	0.668	0.497	7.15e-37		DMXL2	4.24e-92	0.731939	0.381	0.092	9.64e-88
KLF4	1.89e-52	0.607865	0.311	0.103	4.3e-48		ABCA1	1.86e-106	0.912464	0.374	0.051	4.23e-102		DMXL2	9.07627e-59	0.618423	0.229	0.037	2.06422e-54		S100A11	4.32325e-139	0.942698	0.938	0.643	9.83238e-135		GADD45B	5.9e-32	0.398238	0.533	0.358	1.34e-27		KLF4	1.82e-77	0.730706	0.467	0.164	4.13e-73
MT2A	2.16e-41	0.605189	0.866	0.744	4.91e-37		IGSF6	5.37e-101	0.911952	0.356	0.045	1.22e-96		KLF4	7.29174e-54	0.618011	0.319	0.103	1.65836e-49		FCGR1A	6.00321e-92	0.940394	0.314	0.024	1.36531e-87		LGALS3BP	1.19e-44	0.397014	0.383	0.199	2.71e-40		RCAN1	2.62e-60	0.728405	0.312	0.093	5.96e-56
LUCAT1	1.69e-33	0.604351	0.173	0.045	3.85e-29		LITAF	2.39e-80	0.911186	0.75	0.427	5.43e-76		S100A11	4.35397e-82	0.61701	0.839	0.643	9.90222e-78		ZFAND5	1.49253e-59	0.939734	0.73	0.416	3.39446e-55		KLF4	3.62e-37	0.393954	0.319	0.164	8.24e-33		ANKRD22	7.17e-68	0.726797	0.311	0.082	1.63e-63
TNFAIP6	7.56e-30	0.600265	0.186	0.059	1.72e-25		LCP2	1.18e-81	0.910349	0.525	0.201	2.68e-77		AC015912.3	2.49516e-45	0.615962	0.269	0.084	5.67474e-41		IGSF6	1.97062e-95	0.932689	0.368	0.045	4.48179e-91		DUSP1	2.93e-30	0.393457	0.798	0.678	6.65e-26		HLA-DQA1	1.12e-64	0.723562	0.701	0.379	2.54e-60
FCGR1A	4.06e-48	0.597532	0.179	0.024	9.22e-44		SECTM1	2.98e-114	0.907366	0.42	0.069	6.77e-110		KRT14	6.16306e-11	0.615775	0.217	0.137	1.40167e-06		IFITM3	2.34249e-117	0.931875	0.915	0.484	5.32752e-113		TIMP2	1.05e-44	0.391869	0.384	0.201	2.39e-40		LAIR1	8.89e-66	0.723522	0.398	0.139	2.02e-61
SECTM1	5.71e-62	0.597244	0.284	0.069	1.3e-57		ASAH1	9.93e-117	0.903693	0.574	0.172	2.26e-112		FCGR1A	6.16421e-50	0.614564	0.185	0.024	1.40193e-45		S100A2	1.87523e-25	0.927575	0.362	0.184	4.26483e-21		FTH1	9.48e-27	0.391103	0.975	0.944	2.16e-22		TIMP1	5.08e-51	0.718564	0.694	0.394	1.16e-46
RAC1	8.18e-68	0.593765	0.676	0.409	1.86e-63		FCGR1A	1.47e-91	0.902412	0.294	0.024	3.35e-87		SECTM1	2.377e-64	0.612604	0.293	0.069	5.40602e-60		COL17A1	4.05231e-42	0.923603	0.192	0.031	9.21618e-38		ISG15	3.4e-23	0.391035	0.835	0.728	7.74e-19		KCTD12	3.25e-102	0.718127	0.475	0.133	7.4e-98
S100A11	9.97e-80	0.59366	0.837	0.643	2.27e-75		MFSD1	6.37e-116	0.899019	0.526	0.14	1.45e-111		RAC1	7.422e-70	0.609495	0.684	0.409	1.68799e-65		SECTM1	2.84004e-111	0.922409	0.447	0.069	6.45911e-107		GSTO1	5.45e-46	0.390063	0.512	0.311	1.24e-41		SECTM1	2.73e-94	0.715768	0.447	0.129	6.21e-90
VEGFA	2.17e-57	0.586648	0.294	0.083	4.94e-53		ANXA2	2.97e-127	0.89251	0.811	0.431	6.75e-123		ANXA2	3.17457e-67	0.60387	0.692	0.431	7.21993e-63		LCP2	3.7297e-71	0.921736	0.538	0.201	8.48245e-67		PLAU	2.41e-48	0.389918	0.309	0.135	5.49e-44		HSPA6	2.98e-71	0.715618	0.3	0.07	6.77e-67
TIMP2	1.23e-62	0.585729	0.375	0.128	2.79e-58		RAC1	9.17e-126	0.891441	0.795	0.409	2.09e-121		VMO1	8.99581e-41	0.601469	0.162	0.025	2.04592e-36		LITAF	4.33452e-65	0.921704	0.763	0.427	9.85799e-61		CEBPB	2.78e-37	0.389082	0.572	0.386	6.33e-33		S100A10	7.31e-78	0.715156	0.899	0.724	1.66e-73
IGSF6	1.53e-51	0.585542	0.224	0.045	3.48e-47		CREG1	2.29e-108	0.89133	0.484	0.121	5.22e-104		HLA-DQA1	1.19569e-42	0.60058	0.529	0.301	2.71936e-38		CCRL2	8.47196e-79	0.916992	0.352	0.059	1.92678e-74		ANKRD22	2.12e-29	0.388528	0.189	0.082	4.83e-25		PMP22	3.75e-77	0.714896	0.486	0.181	8.52e-73
GSTO1	4.1e-63	0.581117	0.501	0.236	9.32e-59		NCF2	4.01e-115	0.882671	0.419	0.064	9.12e-111		TIMP2	2.27561e-64	0.598845	0.384	0.128	5.17542e-60		ATP1B3	2.06222e-89	0.911906	0.747	0.342	4.69012e-85		ETS2	6.34e-46	0.386939	0.434	0.236	1.44e-41		AC015912.3	3.04e-69	0.714807	0.412	0.143	6.91e-65
ANXA2	9.98e-66	0.573812	0.687	0.431	2.27e-61		GK	4.78e-75	0.879989	0.437	0.139	1.09e-70		COL6A3	4.74089e-15	0.595013	0.161	0.078	1.07822e-10		RAC1	1.86195e-110	0.908184	0.822	0.409	4.23462e-106		RNF130	1.25e-43	0.386782	0.41	0.224	2.84e-39		IGSF6	2.2e-79	0.71412	0.368	0.099	5.01e-75
COL6A3	7.63e-14	0.573043	0.155	0.078	1.74e-09		CD74	1.42e-97	0.875639	0.924	0.738	3.22e-93		GSTO1	3.96777e-65	0.594456	0.512	0.236	9.02389e-61		VMO1	2.09167e-74	0.903396	0.27	0.025	4.75709e-70		SOCS3	2.23e-30	0.38532	0.519	0.354	5.06e-26		ASAH1	3.46e-83	0.712708	0.6	0.253	7.86e-79
ABCA1	1.61e-55	0.572181	0.242	0.051	3.67e-51		SGK1	4.05e-86	0.871944	0.478	0.146	9.21e-82		TNFAIP6	9.93541e-31	0.594289	0.191	0.059	2.25961e-26		SGK1	6.90306e-85	0.900947	0.516	0.146	1.56996e-80		HLA-DPB1	1.06e-27	0.380654	0.64	0.485	2.4e-23		SOCS3	8.33e-65	0.712641	0.671	0.354	1.89e-60
CCRL2	9.21e-43	0.571493	0.222	0.059	2.1e-38		HLA-DMA	5.48e-92	0.865564	0.6	0.244	1.25e-87		IGSF6	1.06785e-52	0.593795	0.229	0.045	2.4286e-48		MFSD1	1.43494e-101	0.89775	0.538	0.14	3.26348e-97		SCD	3.05e-21	0.380366	0.1	0.034	6.94e-17		HLA-DQB1	3.84e-63	0.711531	0.775	0.479	8.73e-59
ATF3	1.72e-45	0.5712	0.463	0.239	3.9e-41		ATP2B1-AS1	3.04e-62	0.865175	0.337	0.094	6.92e-58		VEGFA	6.36097e-60	0.59303	0.304	0.083	1.44667e-55		NCF2	1.56707e-114	0.893793	0.452	0.064	3.564e-110		KRT17	7.14e-13	0.378957	0.227	0.152	1.62e-08		FPR1	1.77e-78	0.709401	0.37	0.099	4.02e-74
FPR1	8.22e-48	0.567934	0.215	0.045	1.87e-43		OLR1	5.72e-60	0.861561	0.233	0.032	1.3e-55		HSPA6	1.85424e-44	0.583972	0.173	0.025	4.21711e-40		APLP2	1.51862e-106	0.892961	0.609	0.178	3.45381e-102		PLEC	7.72e-33	0.375848	0.462	0.294	1.76e-28		KRT17	2.46e-31	0.708746	0.317	0.152	5.59e-27
GK	2.28e-39	0.561991	0.324	0.139	5.18e-35		GSTO1	3.16e-112	0.8612	0.634	0.236	7.18e-108		LAMC2	3.43302e-17	0.58149	0.124	0.045	7.80771e-13		ANKRD22	1.38636e-79	0.892688	0.311	0.037	3.153e-75		IGSF6	2.02e-35	0.375225	0.229	0.099	4.59e-31		RAC1	2.43e-94	0.703988	0.822	0.491	5.52e-90
HEXB	1.63e-60	0.560331	0.395	0.153	3.72e-56		ANKRD22	9.99e-84	0.859943	0.3	0.037	2.27e-79		LAMA3	3.34047e-18	0.580315	0.116	0.038	7.59724e-14		ABCA1	3.01356e-102	0.8882	0.393	0.051	6.85375e-98		PERP	4.9e-10	0.374813	0.209	0.148	1.11e-05		RNF130	4.7e-88	0.701691	0.575	0.224	1.07e-83
HLA-DMA	1.25e-46	0.559072	0.469	0.244	2.83e-42		IFNGR2	7.11e-116	0.8599	0.527	0.138	1.62e-111		IGFBP7	5.23295e-23	0.575553	0.257	0.124	1.19013e-18		LHFPL2	8.46433e-108	0.886306	0.412	0.057	1.92504e-103		GAPDH	3.22e-31	0.373756	0.806	0.689	7.33e-27		NCF2	2.77e-104	0.699682	0.452	0.116	6.3e-100
HSPA6	1.09e-43	0.558312	0.17	0.025	2.47e-39		LAMC2	3.11e-29	0.859088	0.167	0.045	7.07e-25		ABCA1	1.00905e-57	0.575263	0.25	0.051	2.29489e-53		ISG15	7.31073e-61	0.88567	0.906	0.662	1.66268e-56		LILRB4	6.05e-30	0.373119	0.219	0.103	1.37e-25		VAMP5	2.43e-59	0.699603	0.624	0.344	5.52e-55
LAP3	5.54e-55	0.55352	0.604	0.35	1.26e-50		MT2A	3.75e-77	0.85883	0.917	0.744	8.53e-73		MT1E	3.88409e-21	0.568721	0.363	0.221	8.83359e-17		HSPA6	7.17501e-85	0.880057	0.3	0.025	1.63181e-80		S100A10	3.55e-34	0.370815	0.82	0.724	8.07e-30		AQP9	5.04e-58	0.697847	0.266	0.068	1.15e-53
LITAF	2.17e-34	0.553213	0.626	0.427	4.92e-30		LGALS1	3.21e-114	0.856089	0.835	0.464	7.31e-110		ATF3	9.56853e-47	0.56299	0.473	0.239	2.17617e-42		CD9	7.735e-81	0.876726	0.514	0.154	1.75917e-76		VEGFA	5.45e-44	0.369508	0.304	0.14	1.24e-39		MFSD1	2.83e-82	0.697544	0.538	0.211	6.44e-78
IGFBP7	6.38e-21	0.553035	0.246	0.124	1.45e-16		CSF1R	1.88e-95	0.855326	0.335	0.041	4.27e-91		CREG1	2.53411e-59	0.560771	0.357	0.121	5.76332e-55		AQP9	4.1167e-68	0.875548	0.266	0.03	9.36262e-64		ASAH1	1.02e-44	0.366712	0.449	0.253	2.33e-40		DAB2	1.69e-83	0.692618	0.435	0.138	3.84e-79
GSN	1.62e-63	0.552003	0.392	0.139	3.68e-59		FNIP2	1.06e-98	0.853361	0.376	0.061	2.41e-94		F3	4.43192e-27	0.560702	0.22	0.09	1.00795e-22		DAB2	5.13981e-99	0.873805	0.435	0.08	1.16895e-94		LCP2	3.41e-24	0.364924	0.401	0.27	7.76e-20		CD86	1.87e-77	0.691615	0.42	0.131	4.24e-73
CREG1	1.08e-57	0.549872	0.348	0.121	2.46e-53		SLC31A2	3.37e-117	0.847789	0.421	0.065	7.66e-113		LAP3	9.16527e-55	0.559489	0.61	0.35	2.08446e-50		CAV1	1.24279e-27	0.872106	0.293	0.126	2.82648e-23		CREG1	5.96e-41	0.364344	0.357	0.187	1.36e-36		PLAU	4.93e-92	0.688788	0.459	0.135	1.12e-87
SLC31A2	1.51e-62	0.549619	0.281	0.065	3.44e-58		HEXB	3.1e-106	0.846583	0.52	0.153	7.05e-102		HLA-DMA	1.27262e-45	0.557854	0.47	0.244	2.89433e-41		SFN	1.41026e-28	0.871403	0.24	0.083	3.20735e-24		PMP22	3.74e-36	0.36331	0.337	0.181	8.5e-32		LITAF	3.9e-51	0.687743	0.763	0.493	8.87e-47
LILRA5	1.07e-37	0.546859	0.175	0.038	2.42e-33		FN1	3.85e-34	0.844379	0.3	0.126	8.76e-30		ANKRD22	9.72527e-43	0.55442	0.189	0.037	2.21182e-38		IFNGR2	3.18891e-105	0.867845	0.55	0.138	7.25255e-101		LAIR1	4.03e-27	0.362961	0.259	0.139	9.16e-23		SDC1	5.23e-32	0.68689	0.199	0.069	1.19e-27
IFNGR2	5.03e-61	0.545479	0.381	0.138	1.14e-56		F3	1.03e-40	0.842081	0.268	0.09	2.33e-36		FPR1	2.25232e-48	0.554387	0.219	0.045	5.12246e-44		CD74	5.26893e-79	0.866969	0.936	0.738	1.19831e-74		NFKBIZ	3.42e-24	0.362285	0.649	0.511	7.77e-20		TREM1	3.32e-64	0.6853	0.312	0.087	7.55e-60
SPARCL1	9.21e-08	0.543087	0.123	0.071	0.00209361		ATP6V1F	1.77e-99	0.840594	0.74	0.377	4.02e-95		SLC31A2	4.01053e-65	0.551712	0.29	0.065	9.12115e-61		CREG1	3.38325e-94	0.866263	0.492	0.121	7.69452e-90		APLP2	3.41e-42	0.361822	0.422	0.24	7.75e-38		SIRPA	1.61e-107	0.682256	0.44	0.108	3.67e-103
MFSD1	2.41e-58	0.541662	0.375	0.14	5.49e-54		LAMA3	8.37e-30	0.837893	0.156	0.038	1.9e-25		CCRL2	2.12601e-42	0.551398	0.223	0.059	4.83519e-38		PLTP	6.11725e-83	0.86583	0.329	0.043	1.39125e-78		TUBB	2.38e-35	0.361096	0.503	0.332	5.42e-31		SGK1	1.28e-72	0.681032	0.516	0.201	2.92e-68
OLR1	7.24e-30	0.539398	0.143	0.032	1.65e-25		AQP9	6.32e-65	0.837846	0.242	0.03	1.44e-60		SPARCL1	5.23428e-08	0.551078	0.126	0.071	0.00119043		HLA-DMA	1.33793e-81	0.865549	0.624	0.244	3.04285e-77		TNFRSF1A	5.18e-45	0.359463	0.335	0.166	1.18e-40		IFITM3	3.97e-92	0.676874	0.915	0.569	9.03e-88
LCP2	1.41e-39	0.537925	0.399	0.201	3.2e-35		ITGAX	1.5e-79	0.832544	0.305	0.045	3.41e-75		LCP2	4.89634e-39	0.550988	0.401	0.201	1.11357e-34		RCAN1	4.08634e-67	0.864373	0.312	0.057	9.29356e-63		TPM4	1.06e-39	0.359284	0.685	0.508	2.41e-35		PLTP	1.38e-70	0.675004	0.329	0.089	3.14e-66
CD74	2.29e-42	0.536763	0.861	0.738	5.21e-38		LHFPL2	8.06e-106	0.831614	0.378	0.057	1.83e-101		MFSD1	2.23019e-59	0.549421	0.382	0.14	5.07213e-55		SLC31A2	8.30551e-111	0.861593	0.44	0.065	1.88892e-106		PKM	3.49e-32	0.355948	0.653	0.48	7.93e-28		LHFPL2	4.22e-90	0.670164	0.412	0.116	9.6e-86
SGK1	5.77e-42	0.534964	0.343	0.146	1.31e-37		SLC7A7	2.37e-88	0.831533	0.313	0.041	5.39e-84		RSAD2	5.5782e-27	0.549018	0.322	0.162	1.26865e-22		SLAMF8	1.38645e-86	0.860747	0.359	0.054	3.15321e-82		TPM1	2.47e-23	0.355123	0.267	0.156	5.61e-19		CREG1	4.93e-76	0.669837	0.492	0.187	1.12e-71
LHFPL2	9.05e-60	0.534881	0.259	0.057	2.06e-55		SLC15A3	1.83e-119	0.831463	0.417	0.06	4.16e-115		LITAF	1.83067e-33	0.548636	0.628	0.427	4.16349e-29		GK	1.49225e-64	0.860479	0.442	0.139	3.39383e-60		C3AR1	7.51e-32	0.354413	0.242	0.116	1.71e-27		APOC1	4.02e-44	0.664088	0.235	0.069	9.15e-40
ANKRD22	1.01e-41	0.533683	0.184	0.037	2.29e-37		SLAMF8	4.48e-92	0.829314	0.347	0.054	1.02e-87		GSN	4.13341e-64	0.547878	0.398	0.139	9.40061e-60		CSF1R	3.57056e-93	0.860178	0.354	0.041	8.12053e-89		ZFAND5	5.44e-21	0.354101	0.627	0.492	1.24e-16		ABCA1	3.48e-87	0.663403	0.393	0.104	7.92e-83
FNIP2	7.68e-52	0.530698	0.249	0.061	1.75e-47		ATP1B3	2.42e-95	0.826465	0.715	0.342	5.51e-91		HEXB	6.26455e-61	0.541546	0.402	0.153	1.42475e-56		OLR1	9.44568e-55	0.859095	0.233	0.032	2.14823e-50		B3GNT5	3.06e-45	0.352502	0.293	0.131	6.95e-41		PLEC	8.35e-54	0.655088	0.565	0.294	1.9e-49
SLAMF8	2.56e-49	0.529149	0.23	0.054	5.81e-45		HCK	3.09e-89	0.825853	0.337	0.05	7.02e-85		DSP	1.597e-19	0.538218	0.176	0.076	3.63206e-15		HCK	6.38972e-90	0.858916	0.364	0.05	1.45321e-85		HES4	1.2e-41	0.351083	0.449	0.26	2.74e-37		HCK	5.91e-76	0.653056	0.364	0.1	1.34e-71
NCF2	5.93e-53	0.527788	0.257	0.064	1.35e-48		LAP3	3.04e-98	0.825446	0.719	0.35	6.9e-94		GK	3.12798e-38	0.536488	0.325	0.139	7.11397e-34		TIMP2	1.59298e-99	0.85784	0.527	0.128	3.62291e-95		SPARCL1	4.15e-06	0.350788	0.126	0.086	0.0944879		TIMP2	1.5e-79	0.650865	0.527	0.201	3.41e-75
ATP2B1-AS1	1.95e-29	0.52626	0.232	0.094	4.43e-25		ATF3	1.35e-89	0.814634	0.602	0.239	3.07e-85		OLR1	1.00828e-30	0.535744	0.147	0.032	2.29312e-26		ATP2B1-AS1	7.25097e-58	0.856932	0.352	0.094	1.64909e-53		ABCA1	2.57e-41	0.350466	0.25	0.104	5.85e-37		KRT6B	1.97e-24	0.650361	0.174	0.063	4.48e-20
RNASE6	1.39e-39	0.520871	0.217	0.062	3.15e-35		RNASE6	3.49e-81	0.813686	0.337	0.062	7.93e-77		NCF2	2.36881e-55	0.53554	0.266	0.064	5.38738e-51		ATF3	3.02598e-83	0.856201	0.634	0.239	6.88198e-79		RCAN1	4.41e-29	0.350421	0.205	0.093	1e-24		SNX10	3.53e-72	0.649433	0.513	0.204	8.04e-68
SLC15A3	2.33e-62	0.520746	0.272	0.06	5.31e-58		DSP	3.69e-30	0.811981	0.216	0.076	8.4e-26		LHFPL2	1.76377e-61	0.53447	0.266	0.057	4.01135e-57		GSTO1	8.92334e-98	0.852586	0.657	0.236	2.02944e-93		LAP3	1.43e-34	0.349827	0.61	0.431	3.25e-30		MAFF	2.27e-72	0.648964	0.589	0.254	5.15e-68
ITGAX	6.44e-40	0.520382	0.192	0.045	1.46e-35		HSPA6	9.38e-82	0.810376	0.275	0.025	2.13e-77		LILRA5	4.35569e-38	0.534328	0.178	0.038	9.90614e-34		S100A10	2.50988e-84	0.847696	0.899	0.675	5.70821e-80		MFSD1	1.65e-39	0.349216	0.382	0.211	3.76e-35		GSTO1	1.66e-78	0.648194	0.657	0.311	3.77e-74
YWHAH	7.72e-47	0.518202	0.488	0.255	1.76e-42		TNFAIP6	1.26e-44	0.797796	0.241	0.059	2.86e-40		SGK1	2.8876e-43	0.532923	0.351	0.146	6.56728e-39		ACTN1	4.36775e-78	0.843525	0.491	0.144	9.93357e-74		CALD1	2.75e-17	0.347749	0.258	0.161	6.26e-13		ZFAND5	1.83e-41	0.647943	0.73	0.492	4.17e-37
RSAD2	2.39e-26	0.517968	0.317	0.162	5.44e-22		TIMP2	4.91e-105	0.794684	0.5	0.128	1.12e-100		IFNGR2	1.66147e-61	0.532812	0.388	0.138	3.77868e-57		MAFF	5.89646e-86	0.842141	0.589	0.193	1.34103e-81		TREM1	4.41e-26	0.346899	0.189	0.087	1e-21		RGL1	3.79e-66	0.647466	0.359	0.112	8.62e-62
HCK	1.74e-44	0.513658	0.212	0.05	3.96e-40		GSN	2.78e-107	0.794576	0.518	0.139	6.33e-103		ACTN1	1.7178e-46	0.527859	0.358	0.144	3.90679e-42		S100A9	3.0385e-142	0.840468	0.676	0.161	6.91045e-138		DMXL2	1.21e-39	0.34633	0.229	0.092	2.76e-35		B3GNT5	9.99e-99	0.645965	0.46	0.131	2.27e-94
IFI27	1.43e-36	0.512515	0.539	0.335	3.26e-32		LILRA5	1.02e-70	0.794093	0.272	0.038	2.32e-66		CD74	3.39948e-40	0.525009	0.862	0.738	7.73144e-36		FNIP2	2.46719e-94	0.838736	0.396	0.061	5.61114e-90		CD86	2.18e-33	0.345028	0.268	0.131	4.96e-29		SLC31A2	1.06e-93	0.644629	0.44	0.125	2.41e-89
AQP9	4.5e-32	0.510586	0.146	0.03	1.02e-27		APOC1	7.05e-50	0.793667	0.216	0.038	1.6e-45		IFI27	1.45579e-38	0.523575	0.55	0.335	3.31089e-34		RNASE6	5.84965e-76	0.837824	0.349	0.062	1.33039e-71		KRT6B	2.81e-13	0.344815	0.123	0.063	6.39e-09		HSPA1B	6.66e-48	0.64372	0.396	0.169	1.51e-43
MT1E	2.4e-19	0.509099	0.355	0.221	5.47e-15		APLP2	8.76e-104	0.793524	0.556	0.178	1.99e-99		CD9	3.85929e-42	0.52337	0.357	0.154	8.77718e-38		TREM1	2.78274e-73	0.837019	0.312	0.046	6.32878e-69		AQP9	2.19e-20	0.344455	0.148	0.068	4.98e-16		CCRL2	1.53e-60	0.639547	0.352	0.114	3.48e-56
EGR1	1.48e-45	0.508918	0.39	0.171	3.36e-41		PLTP	2.62e-76	0.79147	0.291	0.043	5.96e-72		ITGAX	1.11708e-40	0.523261	0.196	0.045	2.54056e-36		LAP3	2.91171e-83	0.835591	0.741	0.35	6.6221e-79		IFI27	1.41e-29	0.343847	0.55	0.389	3.2e-25		EGR1	4.53e-80	0.639529	0.577	0.228	1.03e-75
PLTP	4.69e-47	0.507981	0.207	0.043	1.07e-42		SIRPA	3.92e-109	0.787842	0.399	0.062	8.91e-105		AQP9	2.5213e-32	0.522156	0.148	0.03	5.73419e-28		SIRPA	4.15633e-113	0.835515	0.44	0.062	9.45275e-109		SERPINH1	8.4e-24	0.343381	0.227	0.12	1.91e-19		CSF1R	6.41e-77	0.638912	0.354	0.092	1.46e-72
ATP6V1F	1.32e-48	0.506622	0.617	0.377	3.01e-44		PPIF	4.15e-99	0.784256	0.483	0.131	9.45e-95		SLC15A3	1.28835e-63	0.521541	0.278	0.06	2.93009e-59		EGR1	5.80592e-90	0.833982	0.577	0.171	1.32044e-85		KCTD12	1.51e-47	0.341944	0.305	0.133	3.43e-43		AZIN1-AS1	2.34e-51	0.638194	0.235	0.06	5.33e-47
SLC7A7	1.05e-43	0.506207	0.193	0.041	2.4e-39		YWHAH	5.44e-85	0.783814	0.606	0.255	1.24e-80		FNIP2	1.0757e-52	0.519644	0.254	0.061	2.44648e-48		GSN	5.22522e-101	0.833918	0.548	0.139	1.18837e-96		NCF2	6.08e-41	0.341429	0.266	0.116	1.38e-36		S100A9	7.47e-118	0.638185	0.676	0.244	1.7e-113
MAFF	5.61e-47	0.506111	0.42	0.193	1.28e-42		IL1A	5.24e-57	0.783801	0.21	0.024	1.19e-52		ATP2B1-AS1	1.8448e-28	0.515478	0.231	0.094	4.19563e-24		LGALS1	7.49638e-96	0.833395	0.855	0.464	1.7049e-91		COL5A1	1.95e-20	0.340173	0.169	0.083	4.43e-16		HLA-DMA	3.24e-62	0.636657	0.624	0.321	7.36e-58
DAB2	1.02e-56	0.505762	0.288	0.08	2.33e-52		EGR1	5.3e-86	0.783393	0.521	0.171	1.21e-81		DAB2	8.67104e-59	0.514937	0.296	0.08	1.97205e-54		HES4	8.56068e-85	0.833156	0.572	0.182	1.94696e-80		C1S	2.03e-24	0.338936	0.218	0.11	4.62e-20		VMO1	7.45e-62	0.63614	0.27	0.066	1.69e-57
CCR1	5.62e-38	0.501258	0.187	0.047	1.28e-33		S100A10	2.28e-92	0.782645	0.882	0.675	5.18e-88		HCK	2.56439e-45	0.513607	0.217	0.05	5.83218e-41		SLC7A7	2.1015e-85	0.833034	0.328	0.041	4.77944e-81		GSTP1	6.49e-25	0.337167	0.614	0.468	1.48e-20		TNFRSF1A	1.33e-80	0.633699	0.466	0.166	3.03e-76
LAMA3	5.34e-15	0.501049	0.105	0.038	1.21e-10		COL17A1	1.52e-32	0.782508	0.153	0.031	3.45e-28		PLTP	5.98749e-49	0.513402	0.214	0.043	1.36173e-44		ITGAX	6.78938e-79	0.82901	0.325	0.045	1.54411e-74		SERPINA1	2.23e-31	0.336305	0.245	0.118	5.08e-27		OLR1	2.71e-46	0.633501	0.233	0.065	6.16e-42
ATP6AP1	6.28e-54	0.500866	0.385	0.156	1.43e-49		HLA-DMB	6.66e-82	0.781332	0.431	0.121	1.51e-77		EGR1	4.73379e-48	0.512941	0.401	0.171	1.0766e-43		MFAP5	2.13212e-37	0.828624	0.185	0.034	4.84909e-33		HLA-DQB1	7.08e-26	0.335654	0.629	0.479	1.61e-21		SLC16A10	6.66e-49	0.62868	0.247	0.071	1.51e-44
ATOX1	1.75e-56	0.49768	0.556	0.289	3.97e-52		RSAD2	1.93e-43	0.780507	0.389	0.162	4.4e-39		SLAMF8	2.90179e-49	0.512281	0.233	0.054	6.59953e-45		IL1A	1.04888e-58	0.828362	0.228	0.024	2.38546e-54		TNFAIP6	1.53e-21	0.335499	0.191	0.096	3.48e-17		PERP	4.46e-18	0.628113	0.261	0.148	1.02e-13
HMOX1	5.92e-32	0.496803	0.14	0.027	1.35e-27		EMILIN2	1.06e-92	0.779809	0.367	0.065	2.42e-88		CCR1	8.15563e-38	0.511282	0.189	0.047	1.85483e-33		HEXB	1.37744e-94	0.827879	0.538	0.153	3.13271e-90		SLC31A2	6.84e-47	0.334749	0.29	0.125	1.56e-42		BASP1	5.83e-76	0.627178	0.497	0.183	1.33e-71
F3	8.99e-24	0.496293	0.207	0.09	2.04e-19		LGALS3BP	1.79e-89	0.778417	0.486	0.144	4.08e-85		MAFF	7.64117e-49	0.510153	0.431	0.193	1.73783e-44		APOC1	3.76096e-51	0.827161	0.235	0.038	8.55356e-47		VMO1	2.91e-27	0.334214	0.162	0.066	6.63e-23		ITGAX	7.04e-67	0.626878	0.325	0.09	1.6e-62
CSF1R	1.33e-45	0.494484	0.201	0.041	3.03e-41		TREM1	3.58e-72	0.776718	0.289	0.046	8.14e-68		MMP1	1.92253e-15	0.50949	0.147	0.065	4.37241e-11		YWHAH	2.14146e-80	0.823182	0.641	0.255	4.87033e-76		CCR1	8.1e-23	0.334018	0.189	0.095	1.84e-18		LAP3	2.17e-63	0.625929	0.741	0.431	4.93e-59
EMILIN2	1.2e-49	0.492624	0.248	0.065	2.74e-45		DAB2	2.37e-98	0.775162	0.402	0.08	5.38e-94		APLP2	1.00976e-54	0.505805	0.422	0.178	2.2965e-50		SLC15A3	1.37746e-116	0.823031	0.444	0.06	3.13275e-112		DAB2	5.77e-42	0.333751	0.296	0.138	1.31e-37		GAPDH	1.34e-52	0.625154	0.89	0.689	3.04e-48
APOBEC3A	5.34e-20	0.492252	0.105	0.027	1.21e-15		PILRA	7.65e-85	0.774955	0.303	0.036	1.74e-80		YWHAH	2.70114e-47	0.504779	0.495	0.255	6.14321e-43		LAMB3	4.44731e-47	0.82029	0.227	0.041	1.01145e-42		SIRPA	3.01e-45	0.332152	0.264	0.108	6.84e-41		CD74	1.87e-59	0.624264	0.936	0.78	4.25e-55
ITM2B	2.14e-37	0.491596	0.844	0.7	4.87e-33		CCR1	7.29e-70	0.77233	0.28	0.047	1.66e-65		S100A10	2.64974e-43	0.503355	0.82	0.675	6.02631e-39		EMILIN2	1.33721e-88	0.815433	0.385	0.065	3.04122e-84		HLA-DMA	7.59e-27	0.328961	0.47	0.321	1.73e-22		SLC7A7	7.92e-73	0.623659	0.328	0.086	1.8e-68
CCL4	2.42e-33	0.49138	0.55	0.364	5.5e-29		MAFF	1.28e-85	0.770352	0.544	0.193	2.91e-81		SLC7A7	6.81238e-45	0.503145	0.198	0.041	1.54934e-40		MT1E	3.3805e-30	0.810595	0.429	0.221	7.68826e-26		GNS	1.27e-39	0.328451	0.318	0.159	2.89e-35		ISG15	5.04e-44	0.623126	0.906	0.728	1.15e-39
IL1A	6.82e-29	0.48856	0.127	0.024	1.55e-24		SCARB2	3.05e-102	0.767475	0.539	0.169	6.93e-98		COL17A1	4.7701e-18	0.501221	0.105	0.031	1.08486e-13		ATP6V1F	3.97607e-80	0.810001	0.75	0.377	9.04279e-76		RHOB	2.95e-31	0.326494	0.49	0.319	6.71e-27		ATP2B1-AS1	1.86e-44	0.621197	0.352	0.145	4.23e-40
KRT14	1.62e-08	0.488056	0.204	0.137	0.00036877		APOBEC3A	9.19e-39	0.765333	0.167	0.027	2.09e-34		RNASE6	7.85727e-39	0.500447	0.217	0.062	1.78698e-34		SLC16A10	8.55879e-62	0.805379	0.247	0.031	1.94652e-57		RALA	5.38e-44	0.324568	0.435	0.249	1.22e-39		GRB2	1.12e-53	0.620391	0.663	0.378	2.54e-49
APLP2	4.7e-52	0.484603	0.411	0.178	1.07e-47		B3GNT5	6.81e-106	0.764349	0.424	0.082	1.55e-101		TREM1	2.10077e-37	0.498617	0.189	0.046	4.77779e-33		APOBEC3A	2.8698e-39	0.798847	0.179	0.027	6.52679e-35		ADAP2	4.63e-33	0.324438	0.183	0.072	1.05e-28		TIMP3	1.58e-36	0.620188	0.223	0.077	3.59e-32
MPP1	7.73e-49	0.484153	0.198	0.035	1.76e-44		CCL4	1.69e-80	0.760277	0.691	0.364	3.85e-76		B3GNT5	3.16501e-56	0.497883	0.293	0.082	7.19819e-52		LGALS3BP	1.40485e-88	0.798343	0.527	0.144	3.19506e-84		HLA-DQA1	1.34e-24	0.324123	0.529	0.379	3.04e-20		ADAP2	5.27e-72	0.619951	0.3	0.072	1.2e-67
SCARB2	4.78e-58	0.483494	0.414	0.169	1.09e-53		CD93	8.77e-70	0.755201	0.314	0.063	1.99e-65		TNFRSF1A	5.45914e-57	0.496431	0.335	0.111	1.24157e-52		HLA-DMB	1.5948e-78	0.79473	0.459	0.121	3.62704e-74		PTMS	8.31e-37	0.323375	0.496	0.318	1.89e-32		MT-ND4	5.77e-48	0.619851	0.994	0.948	1.31e-43
CD93	1.17e-33	0.483422	0.203	0.063	2.65e-29		PTPRE	2.47e-92	0.752595	0.53	0.171	5.62e-88		APOBEC3A	4.45422e-21	0.495341	0.11	0.027	1.01302e-16		MMP1	1.60405e-33	0.794249	0.228	0.065	3.64809e-29		AC015912.3	4.44e-28	0.32328	0.269	0.143	1.01e-23		IFNGR2	2.35e-81	0.619095	0.55	0.213	5.33e-77
CD9	8.09e-39	0.483207	0.344	0.154	1.84e-34		SLC16A10	5.44e-62	0.750806	0.233	0.031	1.24e-57		CAV1	6.42416e-20	0.494658	0.242	0.126	1.46105e-15		B3GNT5	3.30204e-106	0.791345	0.46	0.082	7.50984e-102		PLTP	1.87e-35	0.322576	0.214	0.089	4.26e-31		HLA-DMB	1.08e-67	0.618411	0.459	0.172	2.45e-63
VCAN	3.56e-27	0.482339	0.198	0.074	8.1e-23		CD9	4.8e-75	0.747429	0.463	0.154	1.09e-70		ATP6AP1	6.72962e-54	0.493918	0.39	0.156	1.53052e-49		AZIN1-AS1	6.84428e-56	0.789763	0.235	0.032	1.55659e-51		ITGAX	3.82e-27	0.321128	0.196	0.09	8.7e-23		PTPRE	6.17e-66	0.617378	0.547	0.238	1.4e-61
TREM1	2.13e-36	0.481294	0.184	0.046	4.84e-32		PLEKHO1	4.9e-76	0.745696	0.512	0.192	1.12e-71		ATOX1	1.84533e-56	0.493362	0.563	0.289	4.19683e-52		PTPRE	3.09311e-82	0.784922	0.547	0.171	7.03466e-78		ATP6V0B	2.66e-30	0.318567	0.598	0.442	6.05e-26		SLC15A3	1.28e-95	0.615955	0.444	0.125	2.91e-91
PPIF	2.62e-56	0.479701	0.36	0.131	5.96e-52		NCF1	1.63e-53	0.745404	0.396	0.151	3.7e-49		S100A2	2.77882e-12	0.489754	0.282	0.184	6.31986e-08		BASP1	1.53579e-83	0.783595	0.497	0.133	3.49286e-79		EGR1	6.7e-37	0.318488	0.401	0.228	1.52e-32		DSC3	9.65e-52	0.612406	0.159	0.022	2.2e-47
S100A10	2.92e-41	0.478417	0.819	0.675	6.63e-37		SDS	1.27e-41	0.745216	0.154	0.017	2.88e-37		RHOB	3.00788e-40	0.489723	0.49	0.267	6.84083e-36		LGALS3	5.07162e-83	0.781834	0.748	0.341	1.15344e-78		LHFPL2	2.61e-42	0.318328	0.266	0.116	5.94e-38		SLAMF8	2.92e-66	0.610175	0.359	0.113	6.63e-62
B3GNT5	8.39e-53	0.478381	0.281	0.082	1.91e-48		FAM49A	1.62e-78	0.745016	0.351	0.075	3.69e-74		TAGLN	4.75677e-29	0.48896	0.213	0.079	1.08183e-24		GRB2	1.15218e-66	0.777619	0.663	0.305	2.62041e-62		SDC1	2.99e-15	0.317942	0.134	0.069	6.81e-11		APOBEC3A	1.51e-36	0.609566	0.179	0.047	3.44e-32
C11orf96	3.17e-13	0.478286	0.137	0.065	7.21e-09		LGALS3	4.37e-93	0.745011	0.719	0.341	9.95e-89		ITM2B	5.40418e-37	0.488635	0.848	0.7	1.22907e-32		MSR1	3.35392e-69	0.774226	0.256	0.024	7.62781e-65		MAFF	6.95e-35	0.316976	0.431	0.254	1.58e-30		LGALS3	9.04e-70	0.606721	0.748	0.409	2.06e-65
RHOB	6.07e-38	0.477962	0.477	0.267	1.38e-33		LYN	1.7e-97	0.744502	0.494	0.135	3.87e-93		ATP6V1F	4.48499e-48	0.488031	0.623	0.377	1.02002e-43		SCARB2	3.24974e-91	0.773656	0.558	0.169	7.3909e-87		HSPA1B	2.1e-23	0.316472	0.286	0.169	4.77e-19		ATF3	1.47e-67	0.605699	0.634	0.301	3.34e-63
SQOR	1.88e-49	0.476232	0.34	0.13	4.28e-45		SLC8A1	1.26e-91	0.738843	0.322	0.04	2.87e-87		MPP1	1.45179e-48	0.48649	0.2	0.035	3.3018e-44		SCD	3.85534e-43	0.772273	0.167	0.017	8.7682e-39		RGL1	2.54e-29	0.316289	0.231	0.112	5.77e-25		RSAD2	3.12e-33	0.605515	0.413	0.207	7.1e-29
LAMC2	1.04e-13	0.475484	0.111	0.045	2.36e-09		RNF19B	6.28e-97	0.738726	0.453	0.111	1.43e-92		RCAN1	1.24818e-37	0.486389	0.205	0.057	2.83874e-33		TNFRSF1A	4.20736e-91	0.770666	0.466	0.111	9.56881e-87		GSN	1.19e-40	0.315501	0.398	0.217	2.7e-36		IL1A	1.05e-51	0.603792	0.228	0.054	2.38e-47
PILRA	7.04e-43	0.474689	0.187	0.036	1.6e-38		GABARAP	2.47e-91	0.738624	0.86	0.575	5.61e-87		SIRPA	3.51933e-56	0.485411	0.264	0.062	8.00401e-52		CCR1	2.94928e-64	0.769791	0.285	0.047	6.70754e-60		LITAF	7.85e-20	0.314675	0.628	0.493	1.78e-15		GSN	1.85e-76	0.601541	0.548	0.217	4.21e-72
TNFRSF1A	8.72e-54	0.474114	0.324	0.111	1.98e-49		RCAN1	3.62e-60	0.738079	0.273	0.057	8.24e-56		SCARB2	1.19699e-58	0.484588	0.421	0.169	2.72232e-54		CD93	1.12008e-67	0.76651	0.333	0.063	2.54739e-63		SLC15A3	7.86e-42	0.314464	0.278	0.125	1.79e-37		FNIP2	6.52e-76	0.600368	0.396	0.119	1.48e-71
PLEKHO1	8.54e-44	0.474009	0.408	0.192	1.94e-39		GNS	2.64e-95	0.735687	0.427	0.099	6.01e-91		VCAN	7.77611e-28	0.484246	0.202	0.074	1.76852e-23		NCF1	3.23139e-47	0.762708	0.406	0.151	7.34915e-43		C2	5.19e-32	0.313566	0.222	0.101	1.18e-27		FERMT1	2.31e-40	0.59775	0.172	0.04	5.25e-36
LGALS3	1.41e-48	0.471853	0.59	0.341	3.2e-44		ATOX1	1.74e-99	0.735257	0.683	0.289	3.95e-95		CD93	5.53004e-35	0.483975	0.209	0.063	1.2577e-30		PPIF	6.72984e-88	0.761344	0.497	0.131	1.53057e-83		SGK1	3.72e-30	0.313007	0.351	0.201	8.47e-26		PKM	3.58e-55	0.594118	0.766	0.48	8.15e-51
SIRPA	1.41e-52	0.470677	0.251	0.062	3.2e-48		S100A2	1.47e-23	0.73509	0.338	0.184	3.35e-19		CSF1R	4.92199e-46	0.483745	0.204	0.041	1.11941e-41		SQOR	1.3902e-90	0.756772	0.499	0.13	3.16174e-86		ATF3	9.16e-32	0.312487	0.473	0.301	2.08e-27		CCR1	1.05e-48	0.592527	0.285	0.095	2.39e-44
MSR1	1.38e-35	0.470286	0.146	0.024	3.14e-31		ACTN1	1.23e-73	0.732085	0.446	0.144	2.81e-69		HMOX1	2.43509e-33	0.47923	0.145	0.027	5.53812e-29		RNF19B	4.85345e-91	0.753107	0.477	0.111	1.10382e-86		CD151	1.18e-30	0.311777	0.319	0.181	2.69e-26		MSR1	2.27e-60	0.591933	0.256	0.059	5.17e-56
LIMS1	9.75e-51	0.470093	0.463	0.219	2.22e-46		MSR1	1.25e-69	0.732085	0.242	0.024	2.84e-65		GNS	1.15134e-55	0.478146	0.318	0.099	2.61849e-51		SLC8A1	1.67283e-90	0.752567	0.342	0.04	3.80451e-86		OLR1	1.9e-21	0.31015	0.147	0.065	4.32e-17		SDC4	5.54e-63	0.591746	0.391	0.14	1.26e-58
ACP5	3.17e-40	0.467093	0.376	0.173	7.21e-36		GRB2	4.39e-77	0.731586	0.648	0.305	9.98e-73		LGALS3	2.05226e-50	0.477277	0.601	0.341	4.66745e-46		MPP1	7.23179e-82	0.751874	0.31	0.035	1.64473e-77		CXCL11	6.75e-23	0.310102	0.183	0.09	1.54e-18		NCF1	1.81e-39	0.589657	0.406	0.194	4.13e-35
ACTN1	1.41e-41	0.467089	0.341	0.144	3.21e-37		MGAT1	2.64e-98	0.730657	0.547	0.176	6.01e-94		C2	5.93467e-48	0.476535	0.222	0.05	1.34972e-43		CCL4	2.69887e-70	0.750976	0.713	0.364	6.13805e-66		SPINT2	4.82e-23	0.309004	0.284	0.167	1.1e-18		RNF19B	1.09e-75	0.58954	0.477	0.172	2.48e-71
C2	5.31e-47	0.466744	0.217	0.05	1.21e-42		AZIN1-AS1	3.92e-53	0.72665	0.213	0.032	8.91e-49		TUBB	3.76915e-45	0.475623	0.503	0.266	8.57218e-41		FAM49A	9.55544e-73	0.749716	0.364	0.075	2.17319e-68		RTN4	1.89e-33	0.308733	0.567	0.386	4.29e-29		TUBB	5.09e-59	0.586487	0.623	0.332	1.16e-54
RCAN1	1.14e-35	0.465222	0.197	0.057	2.6e-31		MPP1	2.24e-84	0.722491	0.296	0.035	5.1e-80		RALA	3.13277e-55	0.475233	0.435	0.189	7.12487e-51		MIR3945HG	4.02119e-57	0.748018	0.227	0.026	9.1454e-53		HTRA1	2.62e-24	0.308593	0.221	0.115	5.96e-20		SPINT2	9.17e-53	0.58622	0.411	0.167	2.09e-48
S100A9	5.85e-69	0.465123	0.432	0.161	1.33e-64		BASP1	3.81e-86	0.721755	0.466	0.133	8.66e-82		IL1A	9.30029e-30	0.475105	0.131	0.024	2.11516e-25		PILRA	5.70699e-78	0.747496	0.307	0.036	1.29794e-73		HCK	6.55e-30	0.307748	0.217	0.1	1.49e-25		YWHAH	5.01e-64	0.585241	0.641	0.325	1.14e-59
GNS	9.81e-54	0.463231	0.309	0.099	2.23e-49		ARHGAP18	1.67e-82	0.720545	0.475	0.151	3.8e-78		PPIF	3.7711e-57	0.474421	0.367	0.131	8.5766e-53		MGAT1	1.50384e-84	0.746001	0.559	0.176	3.42018e-80		TNC	5.67e-23	0.307246	0.146	0.062	1.29e-18		GNS	4.64e-71	0.585125	0.442	0.159	1.05e-66
RALA	5.19e-52	0.461123	0.422	0.189	1.18e-47		CAV1	8.89e-25	0.720437	0.265	0.126	2.02e-20		TPM4	3.1339e-50	0.473571	0.685	0.439	7.12743e-46		ADAP2	1.43109e-77	0.743634	0.3	0.035	3.25473e-73		ATP1B3	1.97e-29	0.306878	0.582	0.417	4.48e-25		TPM4	4.62e-70	0.58412	0.82	0.508	1.05e-65
SLC16A10	4.73e-33	0.460724	0.148	0.031	1.08e-28		COL1A2	9.86e-29	0.718148	0.233	0.087	2.24e-24		PLEKHO1	1.23608e-43	0.47338	0.412	0.192	2.81121e-39		LILRA5	2.07013e-64	0.74174	0.274	0.038	4.70809e-60		CTHRC1	2.46e-11	0.306666	0.137	0.081	5.6e-07		SCARB2	5.48e-70	0.583682	0.558	0.244	1.25e-65
HLA-DMB	2.55e-38	0.460586	0.298	0.121	5.8e-34		CD40	7.03e-83	0.712819	0.427	0.117	1.6e-78		C11orf96	1.69572e-14	0.472928	0.143	0.065	3.85657e-10		ATP6AP1	1.95187e-86	0.741481	0.528	0.156	4.43915e-82		APOBEC3A	9.38e-17	0.30606	0.11	0.047	2.13e-12		RNASE6	9.2e-58	0.583267	0.349	0.117	2.09e-53
FAM49A	2.08e-39	0.459955	0.236	0.075	4.72e-35		ITM2B	1.16e-68	0.712626	0.896	0.7	2.64e-64		MSR1	8.78477e-37	0.472232	0.15	0.024	1.99792e-32		C2	6.49998e-75	0.740719	0.321	0.05	1.47829e-70		GJB2	2.61e-26	0.305273	0.119	0.039	5.94e-22		ATP6V0B	1.15e-58	0.582573	0.723	0.442	2.63e-54
GABARAP	1.02e-46	0.459159	0.774	0.575	2.32e-42		LIMS1	2.4e-87	0.712585	0.578	0.219	5.46e-83		ATP6V0B	9.98049e-44	0.470886	0.598	0.37	2.26986e-39		RSAD2	1.27204e-41	0.739701	0.413	0.162	2.893e-37		P4HB	1.45e-27	0.30449	0.474	0.328	3.29e-23		LGALS1	1.04e-71	0.582452	0.855	0.547	2.36e-67
SPATS2L	1.28e-42	0.458931	0.497	0.271	2.91e-38		ATP6V0B	6.26e-81	0.712188	0.698	0.37	1.42e-76		PILRA	4.96179e-43	0.47038	0.189	0.036	1.12846e-38		HMOX1	1.93464e-56	0.736667	0.226	0.027	4.39994e-52		LGALS3	1.71e-36	0.302163	0.601	0.409	3.89e-32		C2	1.32e-58	0.577749	0.321	0.101	3.01e-54
CD40	2.73e-46	0.458335	0.316	0.117	6.21e-42		STX11	6.96e-70	0.711246	0.39	0.115	1.58e-65		MFAP5	1.38194e-20	0.46918	0.119	0.034	3.14296e-16		RAB20	1.06097e-83	0.735214	0.32	0.037	2.41295e-79		GABARAP	1.73e-28	0.301597	0.775	0.645	3.92e-24		PRNP	2.46e-31	0.576307	0.43	0.244	5.59e-27
ATP6V0B	3.44e-43	0.458058	0.593	0.37	7.83e-39		ITGB2	2.73e-59	0.708125	0.532	0.251	6.22e-55		CCL4	4.09957e-33	0.468512	0.555	0.364	9.32365e-29		ATP6V0B	4.52899e-71	0.734893	0.723	0.37	1.03003e-66		DST	8.44e-23	0.300144	0.216	0.116	1.92e-18		GK	2.45e-46	0.575579	0.442	0.204	5.58e-42
ATP1B3	7.65e-44	0.457563	0.576	0.342	1.74e-39		TNFRSF1A	1.39e-90	0.707552	0.43	0.111	3.16e-86		SQOR	9.30073e-51	0.467424	0.347	0.13	2.11526e-46		GNS	4.90848e-87	0.73482	0.442	0.099	1.11634e-82		CALU	2.07e-26	0.299847	0.322	0.196	4.71e-22		SLC8A1	2.62e-77	0.575415	0.342	0.087	5.97e-73
PTPRE	1.14e-47	0.457006	0.395	0.171	2.6e-43		ATP6AP1	1.65e-90	0.706543	0.496	0.156	3.74e-86		ATP1B3	4.10014e-44	0.466921	0.582	0.342	9.32494e-40		VSIR	4.00796e-67	0.734815	0.495	0.164	9.1153e-63		ATP13A3	1.01e-32	0.299789	0.367	0.21	2.3e-28		CD93	7.02e-60	0.575351	0.333	0.102	1.6e-55
SLC8A1	1.82e-46	0.454341	0.2	0.04	4.13e-42		ACP5	3.59e-69	0.70633	0.477	0.173	8.17e-65		GABARAP	8.29057e-46	0.466623	0.775	0.575	1.88552e-41		LYN	1.12589e-87	0.728247	0.512	0.135	2.56062e-83		PRNP	5.68e-21	0.299502	0.365	0.244	1.29e-16		MIR3945HG	9.37e-52	0.57485	0.227	0.054	2.13e-47
MGAT1	7.25e-54	0.454059	0.418	0.176	1.65e-49		SMCO4	5.61e-89	0.701535	0.383	0.08	1.27e-84		ACP5	6.19153e-41	0.466313	0.383	0.173	1.40814e-36		STX11	2.33404e-63	0.728105	0.403	0.115	5.30831e-59		AZIN1-AS1	1.43e-21	0.299303	0.14	0.06	3.26e-17		MGAT1	4.06e-66	0.571429	0.559	0.249	9.24e-62
SPHK1	1.86e-51	0.4534	0.317	0.105	4.22e-47		PTAFR	9.03e-75	0.699858	0.268	0.033	2.05e-70		SPATS2L	1.54061e-43	0.464407	0.505	0.271	3.50381e-39		ARHGAP18	7.48888e-75	0.72793	0.494	0.151	1.7032e-70		FERMT1	8.55e-18	0.299252	0.101	0.04	1.94e-13		MERTK	5.17e-59	0.570979	0.242	0.055	1.18e-54
DSP	4.61e-16	0.453161	0.162	0.076	1.05e-11		ADAP2	7.86e-76	0.699595	0.277	0.035	1.79e-71		LIMS1	7.95476e-51	0.463593	0.47	0.219	1.80915e-46		ITGB2	4.51472e-49	0.724574	0.537	0.251	1.02678e-44		MPP1	1.4e-28	0.29904	0.2	0.092	3.19e-24		SCO2	4.41e-63	0.569765	0.448	0.174	1e-58
MIR3945HG	7.19e-27	0.451962	0.124	0.026	1.64e-22		VSIR	1.43e-72	0.699127	0.471	0.164	3.25e-68		HLA-DMB	2.31694e-39	0.463319	0.305	0.121	5.26942e-35		LIMS1	2.31873e-79	0.724274	0.607	0.219	5.27349e-75		BASP1	1.13e-34	0.296907	0.341	0.183	2.56e-30		GSTP1	1.37e-39	0.567043	0.714	0.468	3.11e-35
CXCL11	8.99e-27	0.451028	0.177	0.06	2.04e-22		MIR3945HG	3.46e-52	0.696045	0.201	0.026	7.87e-48		SLC16A10	6.13591e-33	0.463314	0.149	0.031	1.39549e-28		THBD	2.22811e-70	0.720163	0.332	0.059	5.0674e-66		VCAN	2.04e-19	0.296616	0.202	0.111	4.63e-15		FMNL2	1.37e-87	0.566461	0.36	0.086	3.11e-83
SMCO4	6.95e-50	0.450818	0.271	0.08	1.58e-45		C2	2.51e-75	0.695052	0.3	0.05	5.71e-71		PTPRE	2.02851e-48	0.462951	0.403	0.171	4.61343e-44		RNF144B	2.09286e-77	0.712353	0.392	0.08	4.75979e-73		SDC4	1.88e-29	0.295421	0.266	0.14	4.27e-25		ATP6V1F	2.46e-61	0.565999	0.75	0.452	5.61e-57
TUBB	3.98e-43	0.448309	0.494	0.266	9.04e-39		HMOX1	4.84e-56	0.694473	0.212	0.027	1.1e-51		EMILIN2	5.64855e-49	0.462677	0.249	0.065	1.28465e-44		PLEKHO1	1.00784e-61	0.71191	0.514	0.192	2.29213e-57		PTPRE	7.86e-32	0.295406	0.403	0.238	1.79e-27		MPP1	4.45e-61	0.564424	0.31	0.092	1.01e-56
THEMIS2	6.28e-36	0.447508	0.271	0.108	1.43e-31		MPEG1	4.18e-73	0.692469	0.278	0.038	9.51e-69		CXCL11	2.27229e-28	0.462516	0.183	0.06	5.16787e-24		MT1G	8.29211e-28	0.711093	0.143	0.027	1.88587e-23		SNX10	1.72e-33	0.29508	0.361	0.204	3.91e-29		LGALS3BP	1.2e-75	0.562455	0.527	0.199	2.74e-71
ARHGAP18	3.31e-43	0.447379	0.353	0.151	7.53e-39		MT1E	1.52e-27	0.691962	0.396	0.221	3.46e-23		C1S	3.20592e-26	0.460917	0.218	0.088	7.29122e-22		STAT1	1.71283e-70	0.710365	0.816	0.461	3.89548e-66		SPATS2L	1.91e-30	0.294975	0.505	0.338	4.34e-26		THBD	6.98e-60	0.561209	0.332	0.102	1.59e-55
SAP30	1.62e-43	0.447261	0.297	0.108	3.67e-39		NFKBIE	6.33e-78	0.691867	0.349	0.074	1.44e-73		CALD1	2.50846e-17	0.459218	0.258	0.144	5.70498e-13		RALA	1.54515e-76	0.706345	0.542	0.189	3.51414e-72		SCARB2	1.24e-37	0.294614	0.421	0.244	2.83e-33		ITGB2	5.85e-38	0.558942	0.537	0.31	1.33e-33
STX11	1.22e-36	0.446839	0.284	0.115	2.78e-32		SQOR	1.88e-87	0.68994	0.454	0.13	4.28e-83		CD40	9.64113e-47	0.458986	0.321	0.117	2.19268e-42		ITM2B	4.50982e-54	0.706102	0.901	0.7	1.02567e-49		SLC7A7	1.06e-30	0.29377	0.198	0.086	2.4e-26		PPIF	1.45e-67	0.558762	0.497	0.201	3.29e-63
TPM4	1.02e-47	0.446472	0.676	0.439	2.31e-43		MFAP5	1.92e-31	0.686624	0.156	0.034	4.37e-27		PKM	3.47244e-43	0.457924	0.653	0.412	7.89736e-39		CD40	5.47761e-73	0.705664	0.437	0.117	1.24577e-68		FPR1	1.73e-30	0.293276	0.219	0.099	3.94e-26		HEXB	2.71e-70	0.558584	0.538	0.227	6.16e-66
FLOT1	1.2e-50	0.446287	0.457	0.215	2.73e-46		PYCARD	1.64e-87	0.6866	0.557	0.205	3.73e-83		S100A9	6.22704e-70	0.457058	0.44	0.161	1.41622e-65		CLEC5A	9.78125e-49	0.704369	0.201	0.025	2.22455e-44		CD93	1.4e-25	0.292816	0.209	0.102	3.19e-21		RALA	9.51e-66	0.55568	0.542	0.249	2.16e-61
RAB20	5.11e-47	0.4459	0.198	0.037	1.16e-42		FNDC3B	8.18e-87	0.685958	0.522	0.18	1.86e-82		SPHK1	2.54417e-54	0.456934	0.328	0.105	5.7862e-50		ITGA6	3.25309e-13	0.702209	0.22	0.123	7.3985e-09		FMNL2	3.15e-41	0.290037	0.223	0.086	7.15e-37		VSIR	4.17e-57	0.554936	0.495	0.215	9.48e-53
BASP1	3.72e-42	0.444765	0.33	0.133	8.46e-38		ADAM8	2.2e-79	0.68195	0.371	0.083	5.01e-75		MGAT1	9.04294e-55	0.456314	0.426	0.176	2.05664e-50		HSPA1B	1.42666e-51	0.702048	0.396	0.135	3.24464e-47		MSR1	5.27e-26	0.289939	0.15	0.059	1.2e-21		EMILIN2	1.02e-66	0.553508	0.385	0.129	2.32e-62
MMP1	8.07e-13	0.444682	0.135	0.065	1.84e-08		VAMP8	8.93e-71	0.681765	0.679	0.368	2.03e-66		SLC8A1	8.60745e-48	0.455497	0.205	0.04	1.95759e-43		SDS	5.73981e-40	0.701713	0.158	0.017	1.30541e-35		COL5A2	2.95e-14	0.289506	0.15	0.082	6.72e-10		RAB20	9.03e-70	0.552564	0.32	0.085	2.05e-65
APOC1	3.81e-27	0.442444	0.144	0.038	8.66e-23		RNF144B	1.08e-77	0.677861	0.364	0.08	2.45e-73		MIR3945HG	9.28206e-28	0.454441	0.127	0.026	2.11102e-23		GABARAP	2.33664e-68	0.701611	0.871	0.575	5.31422e-64		HLA-DMB	2.26e-27	0.287	0.305	0.172	5.13e-23		PTHLH	1.5e-32	0.552446	0.17	0.05	3.42e-28
ATP13A3	1.29e-43	0.442394	0.358	0.153	2.93e-39		CLEC5A	1.16e-48	0.677539	0.19	0.025	2.64e-44		BASP1	1.48379e-44	0.453324	0.341	0.133	3.37458e-40		ADAM8	1.16226e-78	0.701159	0.4	0.083	2.64332e-74		SLC16A10	1.1e-19	0.286615	0.149	0.071	2.5e-15		CLEC5A	2.09e-42	0.551123	0.201	0.052	4.76e-38
AZIN1-AS1	2.08e-27	0.440895	0.135	0.032	4.73e-23		CLEC4A	1.29e-64	0.675951	0.245	0.032	2.93e-60		ATP13A3	3.12757e-45	0.452254	0.367	0.153	7.11304e-41		TUBB	1.32404e-67	0.701015	0.623	0.266	3.01127e-63		BGN	2.32e-14	0.28633	0.142	0.076	5.28e-10		PILRA	4.59e-61	0.549285	0.307	0.086	1.04e-56
RNF19B	1.67e-50	0.43997	0.32	0.111	3.81e-46		SFN	7.47e-23	0.674969	0.206	0.083	1.7e-18		THEMIS2	4.45636e-36	0.452158	0.274	0.108	1.01351e-31		THEMIS2	1.33789e-62	0.698641	0.389	0.108	3.04277e-58		ITM2B	4.1e-23	0.285972	0.848	0.744	9.32e-19		SQOR	1.1e-75	0.547926	0.499	0.191	2.51e-71
ADAM8	2.85e-43	0.439103	0.261	0.083	6.49e-39		FPR2	6.36e-63	0.673579	0.245	0.034	1.45e-58		SFN	5.3771e-13	0.452058	0.162	0.083	1.22291e-08		CXCL11	8.91339e-51	0.69842	0.275	0.06	2.02717e-46		THEMIS2	5.64e-23	0.285769	0.274	0.16	1.28e-18		FAM49A	6.47e-56	0.546548	0.364	0.129	1.47e-51
C1S	1.22e-23	0.438492	0.207	0.088	2.77e-19		GPR183	2.67e-33	0.673469	0.58	0.387	6.06e-29		AZIN1-AS1	1.33932e-28	0.450872	0.14	0.032	3.04602e-24		TPM4	2.8454e-79	0.698407	0.82	0.439	6.47129e-75		SCO2	4.03e-30	0.285761	0.315	0.174	9.16e-26		MIR205HG	3.68e-36	0.546411	0.157	0.037	8.36e-32
TSC22D1	1.67e-39	0.437479	0.308	0.122	3.79e-35		SAP30	1.93e-79	0.672685	0.41	0.108	4.39e-75		FAM49A	3.93954e-39	0.450442	0.238	0.075	8.9597e-35		GAPDH	3.99387e-60	0.698132	0.89	0.632	9.08326e-56		SPHK1	2.07e-41	0.285514	0.328	0.159	4.71e-37		CXCL11	6.98e-47	0.546007	0.275	0.09	1.59e-42
NFIL3	5.61e-45	0.437239	0.343	0.139	1.28e-40		RAB20	3.3e-82	0.671455	0.296	0.037	7.5e-78		ADAP2	6.17115e-42	0.448122	0.183	0.035	1.4035e-37		PKM	8.34916e-65	0.696094	0.766	0.412	1.89885e-60		LILRA5	3.65e-24	0.285249	0.178	0.082	8.3e-20		STAT1	2.65e-54	0.545491	0.816	0.538	6.02e-50
COL5A2	1.38e-15	0.435991	0.145	0.064	3.14e-11		CD209	1.07e-54	0.669816	0.188	0.017	2.44e-50		COL5A1	1.50875e-21	0.448099	0.169	0.065	3.43136e-17		SMCO4	6.03081e-81	0.69503	0.393	0.08	1.37159e-76		PDIA4	3.34e-32	0.285247	0.33	0.188	7.59e-28		LILRB3	1.42e-61	0.543738	0.273	0.068	3.22e-57
VSIR	2.84e-35	0.434022	0.348	0.164	6.45e-31		COL1A1	3.89e-26	0.668781	0.225	0.088	8.84e-22		APOC1	6.29739e-28	0.447607	0.148	0.038	1.43222e-23		LILRB3	1.74308e-75	0.69376	0.273	0.024	3.96428e-71		ATOX1	4.44e-35	0.284956	0.563	0.372	1.01e-30		PDPN	6.11e-47	0.54029	0.263	0.084	1.39e-42
LYN	1.95e-48	0.43387	0.35	0.135	4.43e-44		NECTIN2	8.39e-98	0.668418	0.469	0.119	1.91e-93		SAP30	2.96278e-44	0.446879	0.303	0.108	6.73825e-40		FMNL2	3.99819e-96	0.693315	0.36	0.042	9.09309e-92		APOC1	8.69e-20	0.284533	0.148	0.069	1.98e-15		ATP13A3	1.04e-59	0.540104	0.491	0.21	2.36e-55
CALD1	3e-15	0.433214	0.247	0.144	6.82e-11		THBD	3.92e-68	0.668241	0.303	0.059	8.93e-64		GAPDH	6.6258e-40	0.446733	0.806	0.632	1.50691e-35		ATP13A3	4.89414e-72	0.692569	0.491	0.153	1.11307e-67		IFNGR2	2.03e-38	0.284063	0.388	0.213	4.63e-34		DST	4.71e-33	0.53941	0.271	0.116	1.07e-28
NCF1	2.07e-25	0.432968	0.294	0.151	4.71e-21		THEMIS2	6.5e-68	0.667043	0.375	0.108	1.48e-63		SMCO4	1.29954e-51	0.444716	0.279	0.08	2.95554e-47		NECTIN2	8.81733e-93	0.692328	0.497	0.119	2.00532e-88		PLEKHO1	3.17e-27	0.283683	0.412	0.262	7.22e-23		GABARAP	4.15e-52	0.536585	0.871	0.645	9.44e-48
ITGB2	2.21e-27	0.432194	0.416	0.251	5.03e-23		OSM	1e-46	0.666015	0.223	0.046	2.28e-42		RNF19B	7.1703e-52	0.44444	0.328	0.111	1.63074e-47		ATOX1	9.12915e-81	0.692224	0.692	0.289	2.07624e-76		CD74	8.25e-22	0.282304	0.862	0.78	1.88e-17		MPEG1	8.23e-58	0.535163	0.295	0.084	1.87e-53
THBD	1.46e-36	0.430818	0.206	0.059	3.32e-32		IL4I1	7.14e-68	0.665352	0.248	0.03	1.62e-63		COL5A2	9.30638e-17	0.443828	0.15	0.064	2.11655e-12		SAP30	1.04536e-76	0.690969	0.437	0.108	2.37747e-72		MGAT1	2.64e-36	0.281742	0.426	0.249	6e-32		NECTIN2	6.44e-77	0.535054	0.497	0.182	1.46e-72
METRNL	6.76e-32	0.429999	0.527	0.323	1.54e-27		RALA	1.47e-83	0.664227	0.521	0.189	3.34e-79		RAB20	2.49686e-48	0.442927	0.203	0.037	5.67862e-44		CD209	9.32789e-56	0.690489	0.201	0.017	2.12144e-51		FNIP2	4.84e-34	0.281276	0.254	0.119	1.1e-29		TPP1	4.22e-65	0.533554	0.52	0.219	9.6e-61
FNDC3B	4.97e-49	0.428946	0.406	0.18	1.13e-44		RNF13	3.43e-87	0.66257	0.503	0.162	7.81e-83		FLOT1	1.95998e-50	0.442536	0.461	0.215	4.45758e-46		MERTK	5.46019e-66	0.687031	0.242	0.022	1.24181e-61		MIR3945HG	7.57e-20	0.281273	0.127	0.054	1.72e-15		STX11	3.49e-47	0.533469	0.403	0.176	7.93e-43
PKM	1.22e-41	0.428662	0.644	0.412	2.78e-37		SPARC	4.29e-23	0.661848	0.251	0.113	9.76e-19		NFIL3	4.63105e-46	0.441399	0.35	0.139	1.05324e-41		NFKBIE	4.83471e-74	0.686847	0.366	0.074	1.09956e-69		RNF19B	6.47e-36	0.280873	0.328	0.172	1.47e-31		NFKBIE	3.85e-64	0.533102	0.366	0.118	8.76e-60
ADAP2	9.22e-40	0.428247	0.175	0.035	2.1e-35		SLC43A2	1.26e-73	0.661379	0.276	0.037	2.87e-69		RTN4	3.21227e-46	0.439213	0.567	0.314	7.30565e-42		GPR183	2.37786e-26	0.686296	0.58	0.387	5.40796e-22		CAP1	3.3e-31	0.280082	0.599	0.425	7.5e-27		ANPEP	1.05e-49	0.532958	0.308	0.108	2.4e-45
GNAI2	1.21e-39	0.427596	0.608	0.373	2.75e-35		ATP13A3	8e-74	0.661178	0.457	0.153	1.82e-69		PTMS	1.46413e-46	0.43879	0.496	0.254	3.32988e-42		PTAFR	3.01514e-71	0.686039	0.277	0.033	6.85734e-67		LUM	3.64e-11	0.279941	0.12	0.067	8.27e-07		THEMIS2	3.31e-49	0.532252	0.389	0.16	7.53e-45
CHMP1B	1.21e-33	0.426453	0.429	0.233	2.76e-29		CHMP1B	1.5e-61	0.660873	0.534	0.233	3.4e-57		STX11	1.15892e-35	0.438585	0.284	0.115	2.63573e-31		MPEG1	3.24535e-72	0.685656	0.295	0.038	7.38091e-68		ATP2B1-AS1	1.53e-15	0.279744	0.231	0.145	3.48e-11		H2AFY	5.26e-61	0.531814	0.627	0.318	1.2e-56
PTAFR	2.53e-37	0.426357	0.163	0.033	5.75e-33		FMNL2	4.47e-92	0.660842	0.326	0.042	1.02e-87		ARHGAP18	5.34938e-42	0.438433	0.354	0.151	1.21661e-37		NFIL3	4.59355e-65	0.681963	0.448	0.139	1.04471e-60		ENO1	8.85e-25	0.279662	0.649	0.5	2.01e-20		ARHGAP18	2.63e-55	0.531548	0.494	0.222	5.98e-51
IL4I1	1.49e-38	0.425737	0.163	0.03	3.39e-34		FLOT1	4.92e-87	0.660421	0.573	0.215	1.12e-82		LAMB3	2.9497e-24	0.437342	0.141	0.041	6.7085e-20		SLC43A2	1.0955e-71	0.680525	0.29	0.037	2.49149e-67		PDPN	1.3e-23	0.279389	0.177	0.084	2.96e-19		NRP2	3.78e-73	0.530837	0.35	0.095	8.59e-69
NFKBIE	7.09e-40	0.42553	0.236	0.074	1.61e-35		PPT1	2.84e-93	0.657812	0.474	0.13	6.46e-89		THBD	1.16903e-37	0.435607	0.211	0.059	2.65873e-33		RNF13	1.82435e-81	0.679286	0.531	0.162	4.14912e-77		ACP5	3.02e-27	0.279297	0.383	0.232	6.86e-23		SDS	1.33e-32	0.530733	0.158	0.041	3.03e-28
TAGLN	7.2e-26	0.425326	0.201	0.079	1.64e-21		LAMB3	1.25e-39	0.657729	0.192	0.041	2.84e-35		ITGB2	1.38056e-26	0.434244	0.416	0.251	3.13982e-22		FNDC3B	8.43455e-75	0.678996	0.534	0.18	1.91827e-70		CD40	9.89e-30	0.278978	0.321	0.178	2.25e-25		ADGRE2	1.3e-46	0.530399	0.3	0.106	2.95e-42
GPR183	1e-14	0.425193	0.501	0.387	2.28e-10		HLA-DRB5	6.69e-59	0.657346	0.462	0.186	1.52e-54		TSC22D1	1.69841e-41	0.434155	0.318	0.122	3.8627e-37		GPNMB	9.67659e-58	0.677155	0.234	0.03	2.20075e-53		PTHLH	9.89e-15	0.278761	0.107	0.05	2.25e-10		CD209	7.54e-50	0.530369	0.201	0.043	1.71e-45
PPT1	1.74e-51	0.424004	0.351	0.13	3.96e-47		GNAI2	8.42e-69	0.654217	0.704	0.373	1.92e-64		NCF1	7.55949e-26	0.431811	0.299	0.151	1.71925e-21		H2AFY	2.81103e-74	0.677002	0.627	0.246	6.39312e-70		SLC8A1	6.49e-33	0.278344	0.205	0.087	1.48e-28		CAP1	7.48e-58	0.529405	0.727	0.425	1.7e-53
RTN4	6.4e-45	0.42321	0.558	0.314	1.46e-40		DOCK4	4.25e-76	0.651342	0.317	0.058	9.66e-72		NFKBIE	1.41706e-41	0.431648	0.244	0.074	3.22283e-37		NRP2	1.2685e-81	0.675849	0.35	0.053	2.88495e-77		NFIL3	1.07e-31	0.278307	0.35	0.199	2.44e-27		SLC43A2	5.61e-57	0.526547	0.29	0.083	1.28e-52
COL5A1	1.91e-19	0.422446	0.16	0.065	4.34e-15		MT1G	7.59e-23	0.650331	0.119	0.027	1.73e-18		VSIR	1.81347e-36	0.429963	0.356	0.164	4.12437e-32		PYCARD	1.17612e-77	0.675361	0.578	0.205	2.67485e-73		ATP6AP1	5.53e-33	0.278204	0.39	0.228	1.26e-28		LYN	1.23e-66	0.526401	0.512	0.206	2.8e-62
NECTIN2	3.29e-55	0.421535	0.345	0.119	7.49e-51		NFIL3	1.44e-72	0.649698	0.436	0.139	3.27e-68		MPEG1	3.22007e-38	0.428099	0.179	0.038	7.3234e-34		RBM47	1.18529e-80	0.672423	0.338	0.049	2.69571e-76		LTBR	6.88e-39	0.277938	0.244	0.106	1.56e-34		ATP6AP1	2.22e-64	0.525767	0.528	0.228	5.05e-60
STAT1	4.22e-43	0.42142	0.694	0.461	9.59e-39		CXCL11	1.79e-46	0.649639	0.244	0.06	4.06e-42		PTAFR	9.40709e-38	0.426715	0.166	0.033	2.13945e-33		ACP5	2.47492e-61	0.671581	0.495	0.173	5.62871e-57		NFKBIE	1.48e-30	0.277903	0.244	0.118	3.37e-26		CD40	2.78e-55	0.525656	0.437	0.178	6.31e-51
MPEG1	4.09e-38	0.42132	0.177	0.038	9.31e-34		TUBB	6.91e-74	0.648142	0.599	0.266	1.57e-69		NECTIN2	2.5362e-57	0.425306	0.355	0.119	5.76808e-53		SCO2	1.14251e-72	0.670623	0.448	0.124	2.59841e-68		MPEG1	1.23e-23	0.277605	0.179	0.084	2.79e-19		RBM47	4.17e-69	0.525609	0.338	0.094	9.48e-65
RNF144B	2.67e-39	0.418428	0.246	0.08	6.08e-35		NUDT16	6.83e-86	0.647697	0.364	0.071	1.55e-81		ADAM8	2.66634e-43	0.42459	0.264	0.083	6.06406e-39		SDC1	3.61611e-26	0.669583	0.199	0.065	8.22413e-22		CALR	1.01e-24	0.276803	0.615	0.48	2.31e-20		LIMS1	3.11e-60	0.523239	0.607	0.296	7.08e-56
PTMS	3.35e-44	0.417277	0.486	0.254	7.63e-40		STAT1	2.84e-76	0.647674	0.786	0.461	6.46e-72		GNAI2	1.61061e-38	0.423311	0.612	0.373	3.66301e-34		GNAI2	1.41743e-57	0.668941	0.716	0.373	3.22365e-53		CCL20	1.17e-27	0.276795	0.251	0.128	2.67e-23		GPNMB	2.73e-51	0.52262	0.234	0.06	6.22e-47
CD209	2.45e-28	0.416968	0.111	0.017	5.57e-24		MMP3	9.96e-20	0.64674	0.116	0.031	2.27e-15		STAT1	3.53817e-42	0.421725	0.698	0.461	8.04686e-38		TSC22D1	1.04527e-66	0.667125	0.436	0.122	2.37725e-62		THBD	2.79e-26	0.276653	0.211	0.102	6.35e-22		PLEKHO1	3.76e-45	0.522212	0.514	0.262	8.55e-41
SLC43A2	2.07e-39	0.414128	0.178	0.037	4.7e-35		COL3A1	9.8e-21	0.646509	0.189	0.077	2.23e-16		FNDC3B	7.81488e-50	0.421342	0.414	0.18	1.77734e-45		CLEC4A	5.4364e-62	0.665648	0.254	0.032	1.2364e-57		MERTK	1.91e-24	0.27588	0.139	0.055	4.35e-20		GM2A	9.27e-74	0.520895	0.387	0.116	2.11e-69
ARPC5	2.56e-43	0.413251	0.643	0.4	5.81e-39		IFI27	1.4e-61	0.645424	0.639	0.335	3.17e-57		TIMP3	2.38787e-22	0.42088	0.176	0.069	5.43073e-18		FLOT1	4.84568e-76	0.665587	0.589	0.215	1.10205e-71		LAPTM4A	2.78e-26	0.274877	0.495	0.346	6.33e-22		TNS4	3.13e-41	0.519633	0.172	0.039	7.13e-37
GPNMB	3.23e-31	0.412351	0.142	0.03	7.35e-27		PKM	3.76e-71	0.645379	0.741	0.412	8.55e-67		METRNL	4.6159e-31	0.419897	0.53	0.323	1.04979e-26		COL1A2	9.4131e-30	0.664662	0.254	0.087	2.14082e-25		YBX1	3.09e-25	0.274684	0.661	0.518	7.04e-21		PTAFR	3.97e-58	0.519166	0.277	0.074	9.02e-54
HLA-DRB5	2e-31	0.412335	0.361	0.186	4.54e-27		LILRB3	5.94e-74	0.643457	0.254	0.024	1.35e-69		LYN	6.09591e-48	0.419631	0.354	0.135	1.38639e-43		ADGRE2	8.0456e-62	0.662729	0.3	0.056	1.82981e-57		PDIA3	1.61e-21	0.274248	0.626	0.492	3.66e-17		NFIL3	2.22e-50	0.518871	0.448	0.199	5.05e-46
CAV1	3.98e-17	0.411809	0.23	0.126	9.05e-13		SPHK1	8.03e-89	0.642446	0.432	0.105	1.83e-84		CD209	2.0049e-29	0.41857	0.115	0.017	4.55975e-25		PLXDC2	1.62804e-72	0.659634	0.311	0.048	3.70265e-68		CCRL2	1.05e-24	0.273952	0.223	0.114	2.39e-20		GJB2	7.66e-48	0.515924	0.186	0.039	1.74e-43
PYCARD	1.25e-46	0.410872	0.432	0.205	2.84e-42		S100A8	7.72e-125	0.640441	0.563	0.141	1.76e-120		SLC43A2	1.17339e-39	0.417968	0.18	0.037	2.66864e-35		OSM	2.45347e-43	0.658307	0.229	0.046	5.57992e-39		HEXB	1.13e-37	0.272252	0.402	0.227	2.57e-33		DOCK4	1.42e-63	0.51592	0.331	0.097	3.24e-59
NUDT16	1.78e-49	0.409237	0.259	0.071	4.04e-45		MERTK	7.78e-64	0.637216	0.223	0.022	1.77e-59		FMNL2	6.748e-53	0.416891	0.223	0.042	1.5347e-48		COL1A1	1.05543e-26	0.655358	0.243	0.088	2.40036e-22		PILRA	2.61e-26	0.272169	0.189	0.086	5.94e-22		RNF144B	6.36e-67	0.515644	0.392	0.125	1.45e-62
GAPDH	2.57e-38	0.408591	0.804	0.632	5.85e-34		MMP1	2.61e-28	0.636521	0.197	0.065	5.94e-24		GPNMB	1.08435e-32	0.415598	0.147	0.03	2.46613e-28		PLEC	2.32657e-53	0.655179	0.565	0.25	5.29132e-49		PPIF	2.1e-37	0.271839	0.367	0.201	4.78e-33		TUBA1C	1.11e-55	0.515299	0.517	0.249	2.53e-51
CLEC4A	1.57e-33	0.404597	0.153	0.032	3.57e-29		H2AFY	1.56e-81	0.636283	0.601	0.246	3.56e-77		IL4I1	1.61976e-38	0.414808	0.165	0.03	3.68382e-34		CAP1	1.18115e-67	0.655179	0.727	0.357	2.6863e-63		C11orf96	3e-13	0.270801	0.143	0.079	6.82e-09		P4HB	1.49e-45	0.514649	0.579	0.328	3.4e-41
LILRB3	1.58e-39	0.40448	0.157	0.024	3.6e-35		ADGRE2	1.12e-64	0.63583	0.287	0.056	2.55e-60		NUDT16	5.21085e-50	0.410002	0.263	0.071	1.1851e-45		DOCK4	6.58451e-72	0.652899	0.331	0.058	1.49751e-67		TACSTD2	1.34e-11	0.269488	0.104	0.054	3.05e-07		PDK4	2.84e-41	0.513938	0.246	0.079	6.45e-37
GRB2	1.74e-36	0.404435	0.525	0.305	3.95e-32		VCAN	1.9e-43	0.635441	0.258	0.074	4.33e-39		CTHRC1	1.51996e-11	0.409409	0.137	0.07	3.45684e-07		IL4I1	5.58853e-63	0.650825	0.251	0.03	1.271e-58		SAP30	4.21e-29	0.269369	0.303	0.165	9.57e-25		SAP30	3.1e-61	0.513459	0.437	0.165	7.05e-57
CLEC5A	1.09e-23	0.404285	0.113	0.025	2.47e-19		METRNL	1.96e-57	0.632999	0.628	0.323	4.45e-53		HLA-DRB5	2.25311e-31	0.408942	0.365	0.186	5.12425e-27		PPT1	2.95053e-84	0.649955	0.492	0.13	6.71039e-80		S100A6	1.85e-45	0.268986	0.89	0.794	4.2e-41		CLEC4A	2.53e-52	0.512998	0.254	0.068	5.75e-48
H2AFY	1.78e-43	0.403207	0.479	0.246	4.05e-39		EFHD2	7.43e-71	0.631416	0.681	0.339	1.69e-66		H2AFY	5.71562e-44	0.408942	0.485	0.246	1.2999e-39		DUSP3	3.85261e-81	0.64906	0.35	0.057	8.76199e-77		TPM2	6.26e-15	0.268692	0.237	0.153	1.42e-10		RTN4	2.45e-56	0.512785	0.692	0.386	5.58e-52
FMNL2	4.2e-50	0.402978	0.213	0.042	9.56e-46		SCD	1.82e-37	0.631188	0.142	0.017	4.14e-33		LILRB3	8.66319e-40	0.408265	0.159	0.024	1.97027e-35		SPINT2	1.90221e-54	0.646519	0.411	0.133	4.32619e-50		ITGB2	9.83e-16	0.268612	0.416	0.31	2.23e-11		PTMS	1.03e-58	0.512005	0.62	0.318	2.33e-54
NRP2	4.31e-45	0.402411	0.22	0.053	9.8e-41		RBM47	1.92e-81	0.630259	0.317	0.049	4.37e-77		NRP2	8.26125e-48	0.408074	0.23	0.053	1.87886e-43		HLA-DRB5	2.77842e-51	0.64543	0.473	0.186	6.31897e-47		TNS4	1.62e-20	0.26861	0.106	0.039	3.68e-16		TREM2	1.43e-64	0.509225	0.226	0.04	3.26e-60
OSM	2.42e-23	0.40168	0.146	0.046	5.51e-19		CAP1	1.68e-76	0.629263	0.703	0.357	3.82e-72		CLEC4A	2.01227e-34	0.40721	0.157	0.032	4.5765e-30		VAMP8	5.11218e-59	0.645259	0.699	0.368	1.16266e-54		NECTIN2	3.8e-41	0.268032	0.355	0.182	8.65e-37		OSM	1.27e-34	0.508969	0.229	0.08	2.89e-30
EFHD2	2.67e-36	0.400488	0.561	0.339	6.07e-32		NAIP	1.85e-71	0.626553	0.337	0.074	4.22e-67		S100A6	9.82108e-67	0.407123	0.89	0.738	2.23361e-62		SPARC	7.68786e-25	0.645113	0.277	0.113	1.74845e-20		TPP1	4.06e-34	0.267281	0.385	0.219	9.23e-30		PSMD2	8.02e-28	0.508271	0.461	0.277	1.82e-23
ARRB2	3.93e-39	0.40003	0.307	0.124	8.94e-35		TTYH3	1.06e-80	0.626475	0.384	0.093	2.41e-76		CLEC5A	3.79577e-24	0.406566	0.115	0.025	8.63273e-20		FPR2	2.41373e-55	0.643904	0.24	0.034	5.48954e-51		YWHAH	8.14e-31	0.266838	0.495	0.325	1.85e-26		HES4	7.62e-62	0.5064	0.572	0.26	1.73e-57
S100A6	1.42e-66	0.398998	0.891	0.738	3.23e-62		ARRB2	1.51e-71	0.624631	0.415	0.124	3.44e-67		PPT1	1.14411e-51	0.406356	0.356	0.13	2.60206e-47		RTN4	1.99529e-68	0.643265	0.692	0.314	4.53789e-64		MYL9	1.93e-20	0.265849	0.188	0.096	4.4e-16		SH3PXD2B	6.24e-69	0.506094	0.374	0.117	1.42e-64
VAMP8	2.64e-34	0.397656	0.564	0.368	6.01e-30		FMN1	2.57e-64	0.62098	0.232	0.027	5.85e-60		CAP1	3.06292e-42	0.405856	0.599	0.357	6.96601e-38		ANPEP	6.4436e-62	0.643135	0.308	0.062	1.46547e-57		SLC25A37	3.88e-26	0.265493	0.271	0.145	8.83e-22		CCL4	8.5e-57	0.504712	0.713	0.421	1.93e-52
PLXDC2	3.53e-43	0.396703	0.205	0.048	8.03e-39		EPB41L3	4.77e-71	0.619123	0.28	0.044	1.08e-66		OSM	2.91064e-23	0.40524	0.147	0.046	6.61966e-19		GM2A	5.73139e-83	0.643047	0.387	0.071	1.30349e-78		PSMD2	1.86e-19	0.264061	0.401	0.277	4.24e-15		CDH3	1.94e-43	0.50467	0.148	0.025	4.42e-39
CAP1	9.15e-41	0.393249	0.59	0.357	2.08e-36		CMKLR1	4.28e-67	0.618503	0.245	0.031	9.74e-63		SCD	8.06241e-24	0.40514	0.1	0.017	1.83363e-19		SDC4	2.29407e-62	0.641024	0.391	0.108	5.2174e-58		SLC43A2	9.68e-25	0.26399	0.18	0.083	2.2e-20		RNF13	7.86e-66	0.504558	0.531	0.225	1.79e-61
MFAP5	2.1e-17	0.390829	0.108	0.034	4.78e-13		PGD	6.96e-83	0.617573	0.485	0.153	1.58e-78		GRB2	4.62024e-36	0.404926	0.529	0.305	1.05078e-31		KRT6B	1.62338e-19	0.634016	0.174	0.061	3.69204e-15		H2AFY	1.94e-29	0.263753	0.485	0.318	4.4e-25		ITM2B	1.66e-40	0.503438	0.901	0.744	3.77e-36
FPR2	1.21e-31	0.387891	0.152	0.034	2.75e-27		TPM4	3.96e-81	0.616972	0.779	0.439	9.01e-77		ARPC5	1.04323e-41	0.403429	0.645	0.4	2.37261e-37		IFI27	2.71026e-55	0.632828	0.666	0.335	6.16395e-51		NRP2	1.16e-37	0.263062	0.23	0.095	2.64e-33		SMCO4	6.29e-66	0.503354	0.393	0.134	1.43e-61
CTHRC1	2.52e-10	0.387611	0.131	0.07	5.74e-06		NRP2	3.24e-78	0.615874	0.317	0.053	7.36e-74		RNF144B	7.26414e-41	0.403403	0.254	0.08	1.65208e-36		CHMP1B	5.21285e-53	0.632172	0.551	0.233	1.18556e-48		LIMS1	5.06e-32	0.262557	0.47	0.296	1.15e-27		DUSP3	3.2e-69	0.502502	0.35	0.103	7.28e-65
RBM47	4.36e-43	0.385994	0.207	0.049	9.91e-39		ARPC5	2.25e-72	0.615294	0.741	0.4	5.11e-68		SERPINH1	1.60174e-25	0.403128	0.227	0.096	3.64283e-21		FMN1	2.2922e-62	0.631409	0.242	0.027	5.21315e-58		CSF1R	1.01e-28	0.26248	0.204	0.092	2.29e-24		PLXDC2	9.77e-59	0.501525	0.311	0.095	2.22e-54
RNF13	1.26e-46	0.385697	0.379	0.162	2.87e-42		RTN4	3.38e-74	0.615004	0.661	0.314	7.68e-70		CHMP1B	1.62206e-33	0.402258	0.434	0.233	3.68905e-29		LILRB1	2.52167e-65	0.629891	0.277	0.039	5.73503e-61		HSPB1	3.49e-29	0.262392	0.474	0.317	7.95e-25		HMOX1	5.58e-49	0.499369	0.226	0.058	1.27e-44
PGD	7.72e-48	0.383571	0.374	0.153	1.75e-43		PLXDC2	3.82e-75	0.614188	0.298	0.048	8.69e-71		GPR183	9.77944e-14	0.399591	0.5	0.387	2.22414e-09		PTMS	5.71563e-68	0.62742	0.62	0.254	1.29991e-63		SLAMF8	2.36e-29	0.261709	0.233	0.113	5.37e-25		ADAM8	9.73e-61	0.496408	0.4	0.14	2.21e-56
FMN1	5.61e-35	0.382498	0.148	0.027	1.28e-30		SCO2	1.94e-70	0.613465	0.408	0.124	4.4e-66		PYCARD	9.65927e-48	0.398918	0.441	0.205	2.19681e-43		TNFAIP6	9.75471e-41	0.62702	0.247	0.059	2.21851e-36		ANPEP	9.16e-27	0.261568	0.217	0.108	2.08e-22		FNDC3B	1.41e-57	0.493601	0.534	0.247	3.22e-53
GNB4	7.32e-54	0.382144	0.269	0.071	1.66e-49		TSC22D1	1.19e-65	0.611045	0.401	0.122	2.71e-61		PLXDC2	3.55142e-44	0.395281	0.21	0.048	8.07698e-40		CIITA	7.85622e-56	0.624055	0.322	0.077	1.78674e-51		CAVIN1	1.39e-21	0.261279	0.224	0.124	3.17e-17		C1S	6.81e-31	0.492936	0.267	0.11	1.55e-26
S100A2	4.98e-10	0.381252	0.27	0.184	1.13e-05		BLVRB	6.48e-77	0.610469	0.396	0.106	1.47e-72		LAPTM4A	1.1677e-34	0.394041	0.495	0.289	2.6557e-30		TREM2	5.20687e-67	0.622724	0.226	0.014	1.1842e-62		GPNMB	1.06e-24	0.261063	0.147	0.06	2.41e-20		LILRA5	9.16e-50	0.49266	0.274	0.082	2.08e-45
LAPTM4A	2.73e-33	0.380769	0.487	0.289	6.21e-29		FGR	5.46e-61	0.60784	0.255	0.042	1.24e-56		EFHD2	1.66638e-36	0.392467	0.568	0.339	3.78984e-32		NUDT16	2.0232e-74	0.622016	0.363	0.071	4.60137e-70		NNMT	7.36e-18	0.260786	0.209	0.119	1.67e-13		YBX1	1.51e-39	0.492629	0.741	0.518	3.43e-35
DUSP3	2.89e-46	0.38044	0.226	0.057	6.57e-42		S100A6	1.48e-119	0.607252	0.937	0.738	3.37e-115		MERTK	4.00572e-34	0.391932	0.139	0.022	9.11021e-30		EFHD2	1.70894e-58	0.621969	0.696	0.339	3.88664e-54		RRAD	7.46e-22	0.260434	0.133	0.055	1.7e-17		GNAI2	1.73e-41	0.491352	0.716	0.45	3.94e-37
CFD	5.19e-36	0.379108	0.159	0.031	1.18e-31		TFEC	2.65e-68	0.603571	0.255	0.033	6.02e-64		GNB4	3.32271e-56	0.39007	0.279	0.071	7.55685e-52		VCAN	2.20408e-39	0.621577	0.265	0.074	5.01275e-35		RAB20	1.91e-33	0.260277	0.203	0.085	4.35e-29		AC105460.1	3.13e-46	0.489786	0.159	0.027	7.12e-42
TTYH3	4.91e-42	0.37805	0.269	0.093	1.12e-37		GAPDH	3.51e-63	0.603072	0.866	0.632	7.99e-59		ARRB2	9.79897e-39	0.389332	0.31	0.124	2.22858e-34		TPP1	2.76493e-75	0.621108	0.52	0.162	6.28828e-71		SLC1A3	6.8e-26	0.260144	0.178	0.079	1.55e-21		HRH2	1.91e-42	0.489371	0.239	0.074	4.35e-38
MERTK	5.17e-33	0.377806	0.135	0.022	1.18e-28		GPNMB	1.32e-51	0.599592	0.204	0.03	3.01e-47		RBM47	1.22832e-44	0.387687	0.214	0.049	2.79357e-40		S100A6	7.68576e-101	0.620107	0.947	0.738	1.74797e-96		PTAFR	5.13e-24	0.259843	0.166	0.074	1.17e-19		PYCARD	1.13e-62	0.488497	0.578	0.271	2.58e-58
CMKLR1	1.53e-35	0.37701	0.155	0.031	3.48e-31		HSPA1B	1.51e-48	0.599283	0.359	0.135	3.43e-44		VAMP8	2.45863e-33	0.387295	0.568	0.368	5.59166e-29		DSC3	2.93319e-40	0.617752	0.159	0.017	6.67096e-36		NCF1	9.16e-18	0.258759	0.299	0.194	2.08e-13		FPR2	1.78e-41	0.488257	0.24	0.076	4.06e-37
DOCK4	5.35e-38	0.374456	0.207	0.058	1.22e-33		SH3PXD2B	1.14e-83	0.598191	0.358	0.071	2.6e-79		SCO2	6.33671e-41	0.386619	0.315	0.124	1.44116e-36		TIMP3	7.47003e-31	0.617176	0.223	0.069	1.69891e-26		SQOR	4.8e-35	0.258578	0.347	0.191	1.09e-30		TSC22D1	4.68e-56	0.487359	0.436	0.17	1.06e-51
CNIH4	5.85e-40	0.37311	0.39	0.183	1.33e-35		LILRB1	1.43e-65	0.596978	0.259	0.039	3.25e-61		FPR2	2.95683e-31	0.385879	0.152	0.034	6.72471e-27		COLGALT1	1.78238e-77	0.617004	0.385	0.079	4.05367e-73		GNB4	3.27e-41	0.258501	0.279	0.125	7.45e-37		OGFRL1	3.04e-59	0.487108	0.362	0.121	6.91e-55
CLEC4E	1.74e-26	0.371896	0.131	0.031	3.96e-22		ANPEP	3.56e-66	0.596002	0.298	0.062	8.11e-62		BGN	8.60792e-18	0.385611	0.142	0.056	1.9577e-13		ARRB2	4.23699e-64	0.615908	0.428	0.124	9.63618e-60		CD209	1.9e-21	0.25845	0.115	0.043	4.32e-17		LILRB1	7.65e-56	0.486069	0.277	0.077	1.74e-51
TRPM2	2.17e-31	0.371405	0.138	0.026	4.93e-27		LUM	1.49e-15	0.590903	0.13	0.049	3.38e-11		TTYH3	1.578e-44	0.385185	0.279	0.093	3.58885e-40		EPB41L3	1.13981e-68	0.61572	0.294	0.044	2.59227e-64		LILRB3	9.37e-25	0.258243	0.159	0.068	2.13e-20		SLC25A37	1.3e-45	0.485204	0.366	0.145	2.95e-41
OLFML2B	3.68e-33	0.371241	0.16	0.037	8.36e-29		DUSP3	9.31e-81	0.590797	0.325	0.057	2.12e-76		FMN1	5.67088e-36	0.382075	0.152	0.027	1.28973e-31		METRNL	9.99205e-47	0.615287	0.634	0.323	2.27249e-42		FLOT1	2.37e-31	0.258005	0.461	0.293	5.38e-27		COLGALT1	4.77e-66	0.485104	0.385	0.127	1.08e-61
EPB41L3	1.97e-36	0.37119	0.18	0.044	4.48e-32		LRP1	4.99e-81	0.590171	0.369	0.078	1.14e-76		DUSP3	2.76923e-48	0.381175	0.234	0.057	6.29807e-44		C1S	3.09644e-33	0.614918	0.267	0.088	7.04224e-29		STAT1	3.29e-25	0.256851	0.698	0.538	7.48e-21		ACP5	4.99e-47	0.484565	0.495	0.232	1.13e-42
RHOQ	1.42e-40	0.369679	0.291	0.109	3.22e-36		TPP1	1.47e-79	0.590168	0.491	0.162	3.35e-75		DOCK4	6.36121e-40	0.378451	0.215	0.058	1.44673e-35		MT-ND4	1.55022e-44	0.612523	0.994	0.937	3.52566e-40		OSM	2.26e-14	0.255902	0.147	0.08	5.14e-10		ATOX1	4.34e-59	0.483818	0.692	0.372	9.88e-55
SCO2	3.03e-39	0.367555	0.307	0.124	6.88e-35		CFD	1.08e-68	0.588644	0.254	0.031	2.46e-64		OLFML2B	8.64423e-35	0.378335	0.166	0.037	1.96596e-30		SH3PXD2B	7.40128e-79	0.612366	0.374	0.071	1.68327e-74		CKAP4	4.93e-27	0.255347	0.206	0.101	1.12e-22		S100A6	1.52e-81	0.481971	0.947	0.794	3.47e-77
ADGRE2	4.1e-34	0.367535	0.193	0.056	9.33e-30		GNB4	1.41e-91	0.587981	0.377	0.071	3.22e-87		CALU	3.19128e-31	0.377811	0.322	0.156	7.25792e-27		PDPN	3.44204e-50	0.611769	0.263	0.055	7.82823e-46		S100A9	1.93e-45	0.254774	0.44	0.244	4.38e-41		TPM1	3.5e-33	0.481499	0.331	0.156	7.95e-29
BLVRA	1.06e-49	0.367215	0.314	0.108	2.4e-45		GM2A	4.94e-79	0.587527	0.349	0.071	1.12e-74		PLEC	3.5076e-34	0.375939	0.462	0.25	7.97735e-30		HRH2	3.07779e-49	0.607464	0.239	0.042	6.99981e-45		CLEC4A	8.24e-24	0.25456	0.157	0.068	1.87e-19		FMN1	5.12e-52	0.481478	0.242	0.063	1.16e-47
NAIP	2.51e-36	0.366994	0.228	0.074	5.71e-32		SYK	8.91e-68	0.585489	0.331	0.077	2.03e-63		SLC25A37	3.25445e-31	0.375868	0.271	0.112	7.4016e-27		OGFRL1	9.26612e-67	0.606863	0.362	0.08	2.10739e-62		TSC22D1	7.16e-31	0.254389	0.318	0.17	1.63e-26		FLOT1	1.25e-56	0.481056	0.589	0.293	2.85e-52
GLRX	9.8e-39	0.366539	0.417	0.21	2.23e-34		CYTH4	7.55e-47	0.585045	0.272	0.075	1.72e-42		HSPA1B	1.95616e-28	0.3748	0.286	0.135	4.4489e-24		TTYH3	1.31275e-74	0.606496	0.4	0.093	2.9856e-70		TTYH3	1.84e-34	0.253574	0.279	0.137	4.19e-30		CAV2	9.37e-32	0.478228	0.246	0.1	2.13e-27
SERPINH1	4.66e-23	0.366316	0.217	0.096	1.06e-18		ATP6V0C	3.12e-63	0.584967	0.819	0.55	7.1e-59		PGD	1.02126e-47	0.374466	0.378	0.153	2.32266e-43		FERMT1	1.59116e-32	0.605965	0.172	0.035	3.61878e-28		AP2S1	4.87e-35	0.253532	0.514	0.338	1.11e-30		HLA-DRB5	1.48e-39	0.476364	0.473	0.242	3.37e-35
BGN	8.35e-17	0.366104	0.138	0.056	1.9e-12		OTUD1	1.67e-46	0.582777	0.264	0.072	3.8e-42		RNF13	1.30791e-47	0.374313	0.388	0.162	2.97459e-43		CMKLR1	3.1363e-60	0.605482	0.242	0.031	7.13288e-56		CLEC5A	2.85e-16	0.25332	0.115	0.052	6.48e-12		TTYH3	3.46e-65	0.474885	0.4	0.137	7.86e-61
LAMB3	2.01e-21	0.365105	0.131	0.041	4.57e-17		DCN	2.12e-15	0.582749	0.144	0.06	4.83e-11		CALR	2.10718e-31	0.373666	0.615	0.425	4.79237e-27		NAIP	3.80479e-66	0.603965	0.349	0.074	8.65324e-62		SMCO4	1.63e-36	0.25304	0.279	0.134	3.7e-32		CIITA	6.97e-44	0.473392	0.322	0.123	1.59e-39
BHLHE40	2.43e-32	0.364662	0.453	0.254	5.53e-28		RHOB	4.99e-66	0.582111	0.589	0.267	1.13e-61		ADGRE2	2.80069e-33	0.372345	0.193	0.056	6.36961e-29		TFEC	1.3466e-66	0.601269	0.267	0.033	3.06258e-62		LAMP2	9.26e-34	0.252193	0.354	0.196	2.11e-29		CD300A	3.17e-49	0.472514	0.262	0.077	7.21e-45
LRP1	1.25e-45	0.364479	0.262	0.078	2.85e-41		IRAK3	5.74e-68	0.581924	0.33	0.077	1.3e-63		CMKLR1	9.28192e-36	0.371783	0.157	0.031	2.11099e-31		SMIM25	1.15087e-69	0.600576	0.277	0.032	2.61742e-65		GK	4.87e-21	0.251588	0.325	0.204	1.11e-16		WTAP	8.44e-38	0.472219	0.571	0.313	1.92e-33
SLC25A37	6.57e-29	0.362069	0.26	0.112	1.49e-24		ATF5	1.93e-75	0.581082	0.396	0.107	4.38e-71		ANPEP	4.11064e-39	0.371745	0.217	0.062	9.34882e-35		MEFV	1.85825e-52	0.596493	0.206	0.023	4.22622e-48		NUDT16	5.06e-32	0.251334	0.263	0.13	1.15e-27		LILRB5	2.28e-40	0.469107	0.159	0.033	5.18e-36
RIN2	9.22e-45	0.362033	0.231	0.061	2.1e-40		GLRX	1.25e-69	0.580857	0.523	0.21	2.85e-65		LRP1	4.60886e-48	0.371506	0.272	0.078	1.04819e-43		SYK	2.27698e-62	0.595933	0.342	0.077	5.17854e-58		C1R	7.02e-21	0.250714	0.21	0.112	1.6e-16		SERPINB2	1.28e-43	0.468911	0.145	0.023	2.91e-39
RAB7A	1.46e-43	0.361469	0.501	0.263	3.33e-39		CNIH4	7.62e-66	0.580172	0.482	0.183	1.73e-61		CNIH4	1.03931e-40	0.371456	0.396	0.183	2.36371e-36		CLEC4E	2.03169e-57	0.595677	0.239	0.031	4.62066e-53		IL1A	8.2e-21	0.250534	0.131	0.054	1.86e-16		VAMP8	2.7e-44	0.467533	0.699	0.432	6.14e-40
CNDP2	9.48e-42	0.359283	0.398	0.186	2.16e-37		RASGEF1B	4.43e-61	0.578441	0.437	0.155	1.01e-56		P4HB	2.22906e-34	0.369645	0.474	0.272	5.06955e-30		SLC25A37	4.57367e-50	0.595579	0.366	0.112	1.04019e-45		VSIR	5.6e-26	0.250083	0.356	0.215	1.27e-21		SMIM25	6.36e-57	0.465338	0.277	0.074	1.45e-52
BLVRB	5.64e-43	0.359155	0.292	0.106	1.28e-38		RIN2	1.42e-77	0.576386	0.328	0.061	3.22e-73		TRPM2	8.92688e-32	0.369346	0.14	0.026	2.03024e-27		RIN2	3.25996e-76	0.592621	0.35	0.061	7.41413e-72		MAN2B1	4.52e-25	0.25003	0.296	0.172	1.03e-20		GPR183	3.01e-19	0.464332	0.58	0.43	6.84e-15
TIMP3	1.16e-18	0.359053	0.162	0.069	2.63e-14		CLEC4E	2.83e-53	0.575633	0.213	0.031	6.44e-49		SPINT2	3.76084e-27	0.369303	0.284	0.133	8.55327e-23		PDK4	3.72667e-49	0.592588	0.246	0.045	8.47557e-45		OLFML2B	1.47e-26	0.249451	0.166	0.07	3.34e-22		SERPINB5	5.35e-39	0.463349	0.173	0.041	1.22e-34
ANPEP	2.74e-38	0.35851	0.213	0.062	6.23e-34		SPINT2	7.71e-56	0.575622	0.387	0.133	1.75e-51		CLEC4E	1.43203e-26	0.367643	0.132	0.031	3.25687e-22		SPHK1	1.3076e-77	0.591267	0.441	0.105	2.97388e-73		LY96	3.01e-26	0.248679	0.309	0.178	6.84e-22		NUDT16	1.48e-55	0.463348	0.363	0.13	3.37e-51
SFN	4.77e-10	0.358265	0.149	0.083	1.08e-05		LY96	3.09e-67	0.571284	0.407	0.127	7.03e-63		RHOQ	9.00225e-41	0.366957	0.295	0.109	2.04738e-36		RHOQ	2.40917e-64	0.59124	0.403	0.109	5.47917e-60		SERINC2	3.54e-25	0.248446	0.175	0.08	8.06e-21		ATP6V0C	1.81e-43	0.460138	0.834	0.606	4.11e-39
FGR	6.55e-31	0.357681	0.163	0.042	1.49e-26		PTMS	1e-69	0.570001	0.583	0.254	2.27e-65		TNC	1.89761e-24	0.365231	0.146	0.043	4.31573e-20		CYTH4	2.82099e-41	0.591048	0.274	0.075	6.41578e-37		GRB2	3.66e-22	0.247698	0.529	0.378	8.32e-18		IL4I1	4.36e-46	0.459656	0.251	0.075	9.9e-42
HNMT	3.15e-37	0.357557	0.174	0.04	7.16e-33		QKI	3.63e-77	0.568004	0.582	0.232	8.25e-73		CFD	4.04713e-36	0.36472	0.161	0.031	9.20438e-32		RHOB	1.63483e-59	0.585049	0.617	0.267	3.7181e-55		FAM49A	6.3e-23	0.247275	0.238	0.129	1.43e-18		VSIG4	2.41e-49	0.457734	0.18	0.034	5.47e-45
PLIN2	1.81e-29	0.357046	0.362	0.187	4.12e-25		PLIN2	2.78e-50	0.567146	0.446	0.187	6.32e-46		NAIP	8.04015e-36	0.363847	0.229	0.074	1.82857e-31		TUBA1C	3.81837e-63	0.580953	0.517	0.192	8.68411e-59		SH3PXD2B	5.9e-37	0.246802	0.258	0.117	1.34e-32		CYTH4	2.1e-33	0.457252	0.274	0.11	4.78e-29
CIITA	5.19e-32	0.356287	0.219	0.077	1.18e-27		SLC25A37	7.08e-50	0.566628	0.339	0.112	1.61e-45		RIN2	8.08942e-46	0.363806	0.237	0.061	1.83978e-41		MIR205HG	1.38029e-28	0.580197	0.157	0.033	3.1392e-24		AP2M1	4.22e-25	0.246774	0.46	0.314	9.61e-21		SERINC2	5.53e-47	0.45666	0.256	0.08	1.26e-42
IL3RA	4.16e-27	0.356009	0.151	0.042	9.46e-23		TRPM2	9.74e-58	0.56527	0.217	0.026	2.21e-53		BLVRA	3.49474e-51	0.363429	0.321	0.108	7.94809e-47		COL3A1	4.01758e-19	0.579977	0.196	0.077	9.13717e-15		RNASE6	1.66e-21	0.24589	0.217	0.117	3.78e-17		LTBR	2.46e-66	0.456649	0.345	0.106	5.61e-62
CALR	6.59e-30	0.355056	0.609	0.425	1.5e-25		CTSA	3.17e-76	0.564875	0.475	0.161	7.21e-72		CNDP2	3.027e-43	0.362482	0.407	0.186	6.88429e-39		P4HB	1.12743e-51	0.579804	0.579	0.272	2.56411e-47		GNAI2	5.08e-22	0.245723	0.612	0.45	1.15e-17		RIN2	4.2e-61	0.456006	0.35	0.112	9.56e-57
CTSA	1.62e-43	0.35504	0.368	0.161	3.68e-39		ADA2	7.85e-61	0.564168	0.352	0.101	1.78e-56		EPB41L3	2.5685e-37	0.361176	0.184	0.044	5.84153e-33		PGD	1.00138e-70	0.579083	0.493	0.153	2.27743e-66		COL4A2	1.15e-15	0.245328	0.193	0.11	2.62e-11		MEFV	2.45e-44	0.455287	0.206	0.053	5.57e-40
PTPN6	3.02e-28	0.352924	0.301	0.146	6.88e-24		CIITA	2.06e-59	0.562722	0.31	0.077	4.69e-55		CTSA	3.26583e-45	0.360332	0.377	0.161	7.42747e-41		CFD	1.51048e-67	0.579029	0.268	0.031	3.43529e-63		LRP1	1.4e-36	0.245269	0.272	0.126	3.19e-32		RASSF4	8.13e-54	0.455097	0.289	0.086	1.85e-49
SYK	4.24e-33	0.352311	0.222	0.077	9.64e-29		BLVRA	1.9e-85	0.561402	0.422	0.108	4.32e-81		RAB7A	2.04268e-44	0.359459	0.509	0.263	4.64567e-40		PRNP	2.311e-33	0.579	0.43	0.207	5.25592e-29		TREM2	2.43e-27	0.244285	0.124	0.04	5.52e-23		AP2S1	1.37e-58	0.454866	0.634	0.338	3.11e-54
LILRB1	1.38e-32	0.351655	0.162	0.039	3.14e-28		SMIM25	1.11e-66	0.56	0.252	0.032	2.52e-62		BHLHE40	6.93101e-32	0.359126	0.457	0.254	1.57632e-27		IL3RA	1.9298e-45	0.57807	0.227	0.042	4.38894e-41		ATP6V1F	3.96e-29	0.244029	0.623	0.452	9.01e-25		NAIP	8.74e-51	0.454715	0.349	0.128	1.99e-46
CALU	4.22e-29	0.351431	0.313	0.156	9.6e-25		RHOQ	6.37e-70	0.558591	0.388	0.109	1.45e-65		GLRX	3.56617e-38	0.358892	0.42	0.21	8.11054e-34		ATP6V0C	1.4612e-51	0.575474	0.834	0.55	3.32322e-47		STX11	4.6e-20	0.243949	0.284	0.176	1.05e-15		MKNK1	8.29e-70	0.453637	0.379	0.115	1.89e-65
SLAMF7	1.3e-23	0.349713	0.176	0.066	2.95e-19		COLGALT1	1.3e-76	0.557721	0.355	0.079	2.95e-72		TREM2	4.1163e-34	0.357784	0.124	0.014	9.36169e-30		CNDP2	1.79165e-66	0.574926	0.527	0.186	4.07475e-62		APP	5.35e-22	0.243438	0.338	0.214	1.22e-17		PHC2	4.82e-53	0.453323	0.486	0.213	1.1e-48
SERPINF1	5e-15	0.348059	0.144	0.065	1.14e-10		ITGA6	7.5e-10	0.556691	0.194	0.123	1.71e-05		BLVRB	3.78304e-44	0.357769	0.299	0.106	8.60378e-40		ARPC5	2.69319e-59	0.5745	0.761	0.4	6.12512e-55		TMEM14C	6.54e-24	0.243388	0.383	0.252	1.49e-19		IFI27	9.43e-46	0.4531	0.666	0.389	2.15e-41
TREM2	3.01e-32	0.348008	0.118	0.014	6.84e-28		CDKN1A	1.31e-53	0.55603	0.655	0.355	2.98e-49		C1R	1.20788e-23	0.357483	0.21	0.088	2.74708e-19		WTAP	1.87906e-46	0.57312	0.571	0.255	4.27354e-42		CCN1	1.95e-15	0.242059	0.17	0.093	4.44e-11		SLC7A8	3.78e-68	0.451846	0.221	0.035	8.6e-64
HIF1A	2.36e-32	0.347658	0.589	0.371	5.37e-28		DRAM1	1.68e-76	0.555961	0.326	0.064	3.81e-72		PLIN2	3.6097e-29	0.357165	0.365	0.187	8.20955e-25		OTUD1	5.7296e-44	0.572356	0.277	0.072	1.30308e-39		ARHGAP18	2.39e-23	0.24205	0.354	0.222	5.43e-19		EPB41L3	4.22e-57	0.450121	0.294	0.084	9.59e-53
TCN2	3.57e-29	0.347532	0.147	0.037	8.12e-25		PDK4	6.94e-50	0.555187	0.232	0.045	1.58e-45		TCN2	2.63026e-30	0.356417	0.152	0.037	5.982e-26		VSIG4	1.3157e-54	0.570814	0.18	0.009	2.99229e-50		HMOX1	6.31e-25	0.241932	0.145	0.058	1.43e-20		EFHD2	1.3e-45	0.448015	0.696	0.405	2.96e-41
COLGALT1	1.51e-42	0.347284	0.252	0.079	3.43e-38		PLEC	3.36e-56	0.554875	0.545	0.25	7.65e-52		TPM1	1.13714e-26	0.356395	0.267	0.123	2.58621e-22		BLVRB	5.87408e-70	0.570429	0.411	0.106	1.33594e-65		ZYX	8.5e-29	0.241807	0.501	0.337	1.93e-24		CMKLR1	2.56e-46	0.447552	0.242	0.071	5.81e-42
GNG5	5.34e-42	0.346913	0.735	0.509	1.22e-37		P2RX4	1.82e-64	0.554875	0.31	0.069	4.15e-60		IL3RA	3.74349e-27	0.356072	0.153	0.042	8.51383e-23		CD300A	1.38862e-54	0.570319	0.262	0.046	3.15813e-50		DOCK4	4.24e-30	0.241472	0.215	0.097	9.64e-26		LY96	1.08e-53	0.446971	0.433	0.178	2.45e-49
ZFP36L1	9.96e-25	0.346163	0.617	0.43	2.26e-20		OGFRL1	1.2e-65	0.554399	0.333	0.08	2.73e-61		HIF1A	2.60148e-32	0.355519	0.594	0.371	5.91654e-28		TRPM2	9.50876e-59	0.570176	0.233	0.026	2.16258e-54		TCN2	2.26e-22	0.241173	0.152	0.068	5.14e-18		DRAM1	2.07e-63	0.446871	0.345	0.107	4.71e-59
C1R	1.08e-21	0.345157	0.201	0.088	2.46e-17		CASP1	7.8e-69	0.554291	0.471	0.168	1.77e-64		TPP1	1.95575e-45	0.354836	0.385	0.162	4.44796e-41		DUSP6	5.70964e-54	0.569842	0.387	0.115	1.29854e-49		RBM47	9.4e-32	0.240874	0.214	0.094	2.14e-27		S100A8	1.52e-104	0.446495	0.598	0.205	3.46e-100
LAMP1	8.67e-42	0.344937	0.383	0.173	1.97e-37		LAMP1	1.33e-73	0.554023	0.492	0.173	3.03e-69		ZFP36L1	2.24685e-25	0.354448	0.623	0.43	5.11e-21		PLIN2	3.50894e-40	0.568558	0.443	0.187	7.98037e-36		COL12A1	1.36e-15	0.240372	0.135	0.068	3.09e-11		ITGB4	2.91e-32	0.446238	0.16	0.045	6.62e-28
ATP6V0C	4.21e-31	0.343112	0.742	0.55	9.57e-27		ZNF267	7.44e-66	0.552583	0.466	0.167	1.69e-61		MAN2B1	3.49682e-36	0.353623	0.296	0.121	7.95282e-32		RASSF4	3.16772e-61	0.568019	0.289	0.05	7.20435e-57		ADGRE2	2.18e-18	0.240014	0.193	0.106	4.97e-14		OTUD1	8.62e-38	0.445545	0.277	0.104	1.96e-33
TFEC	1.75e-33	0.342677	0.154	0.033	3.98e-29		TREM2	6.39e-59	0.551644	0.195	0.014	1.45e-54		SH3PXD2B	4.87518e-48	0.353074	0.258	0.071	1.10876e-43		GNB4	1.23239e-86	0.566824	0.395	0.071	2.80282e-82		HLA-DRB5	7.11e-20	0.239876	0.365	0.242	1.62e-15		PPT1	1.32e-63	0.44522	0.492	0.199	3e-59
HSPA1B	1.43e-26	0.341496	0.277	0.135	3.26e-22		CNDP2	6.31e-73	0.550223	0.505	0.186	1.44e-68		HNMT	3.93622e-38	0.352937	0.179	0.04	8.95215e-34		YBX1	2.30983e-44	0.566746	0.741	0.457	5.25325e-40		CD300A	8.13e-24	0.239714	0.17	0.077	1.85e-19		TCN2	4.07e-46	0.444941	0.235	0.068	9.26e-42
SH3PXD2B	1.52e-45	0.341244	0.248	0.071	3.46e-41		DUSP6	5e-56	0.550146	0.365	0.115	1.14e-51		ATP6V0C	5.49381e-32	0.351124	0.749	0.55	1.24946e-27		BLVRA	3.76339e-79	0.5656	0.441	0.108	8.55907e-75		TSPO	5.89e-27	0.239486	0.569	0.414	1.34e-22		AC090617.10	7.12e-37	0.444271	0.177	0.046	1.62e-32
RASGEF1B	2.58e-28	0.340945	0.318	0.155	5.87e-24		DENND5A	3.6e-65	0.550099	0.331	0.081	8.19e-61		PDPN	1.06679e-28	0.350868	0.177	0.055	2.42621e-24		LRP1	1.05211e-74	0.565299	0.383	0.078	2.39281e-70		YBX3	3.37e-24	0.239279	0.496	0.342	7.67e-20		CALR	1.59e-36	0.442534	0.698	0.48	3.62e-32
MAN2B1	2.38e-35	0.340673	0.29	0.121	5.42e-31		MEFV	2.17e-51	0.550089	0.192	0.023	4.93e-47		CIITA	4.01723e-32	0.35035	0.222	0.077	9.13638e-28		SLAMF7	1.06022e-41	0.563109	0.259	0.066	2.41126e-37		ZFP36L1	2.12e-18	0.238459	0.623	0.486	4.83e-14		CNDP2	2.05e-54	0.442526	0.527	0.244	4.66e-50
YBX3	2.61e-33	0.340636	0.489	0.281	5.94e-29		IL3RA	7.26e-48	0.542172	0.219	0.042	1.65e-43		LAMP1	1.73288e-43	0.35028	0.393	0.173	3.94108e-39		TCN2	6.23063e-53	0.560185	0.235	0.037	1.41703e-48		PDK4	1.78e-18	0.23842	0.158	0.079	4.05e-14		TUBA1B	3.48e-39	0.442332	0.701	0.462	7.9e-35
P4HB	1.18e-32	0.339644	0.467	0.272	2.68e-28		HRH2	2.77e-47	0.542111	0.218	0.042	6.3e-43		YBX3	3.87594e-34	0.350213	0.496	0.281	8.81505e-30		CTSA	4.33288e-68	0.560154	0.49	0.161	9.85426e-64		HIF1A	9.64e-21	0.237999	0.594	0.439	2.19e-16		LAMP2	3.84e-59	0.44228	0.474	0.196	8.74e-55
ADA2	7.87e-33	0.337901	0.257	0.101	1.79e-28		AP2S1	5.15e-77	0.540598	0.617	0.272	1.17e-72		LY96	3.08343e-37	0.350005	0.309	0.127	7.01265e-33		CASP1	2.30163e-64	0.559612	0.497	0.168	5.23459e-60		PLXDC2	5.09e-30	0.237171	0.21	0.095	1.16e-25		DUSP6	1.26e-50	0.442126	0.387	0.148	2.86e-46
SPINT2	3.04e-25	0.337528	0.275	0.133	6.92e-21		SLAMF7	1.57e-43	0.54013	0.246	0.066	3.56e-39		FGR	7.90278e-31	0.349981	0.164	0.042	1.79733e-26		ZNF267	4.6681e-58	0.557554	0.479	0.167	1.06166e-53		CAV2	3.09e-21	0.236744	0.192	0.1	7.03e-17		AP2M1	2.09e-40	0.442043	0.55	0.314	4.76e-36
VIM	3.11e-23	0.337426	0.832	0.683	7.07e-19		GLIPR2	1.78e-70	0.53932	0.464	0.159	4.04e-66		AP2S1	7.37109e-45	0.349242	0.514	0.272	1.67641e-40		LILRB5	4.37476e-45	0.557224	0.159	0.011	9.94951e-41		FNDC3B	8.11e-33	0.235947	0.414	0.247	1.85e-28		CLEC4E	9.15e-49	0.441998	0.239	0.064	2.08e-44
GM2A	4.92e-41	0.337288	0.236	0.071	1.12e-36		TCN2	8.41e-53	0.538734	0.22	0.037	1.91e-48		NNMT	2.67712e-19	0.349054	0.209	0.099	6.08858e-15		ATF5	1.03041e-71	0.556431	0.419	0.107	2.34346e-67		TPI1	3.24e-22	0.235849	0.682	0.542	7.38e-18		RHOQ	7.71e-49	0.441768	0.403	0.167	1.75e-44
CORO1C	1.07e-43	0.3371	0.279	0.096	2.43e-39		HNMT	4.17e-63	0.538705	0.252	0.04	9.48e-59		YBX1	4.22196e-31	0.348801	0.661	0.457	9.60201e-27		DRAM1	6.78915e-74	0.555964	0.345	0.064	1.54406e-69		ATP6V0C	4.39e-23	0.235789	0.749	0.606	9.98e-19		IRF8	7.52e-39	0.441613	0.354	0.152	1.71e-34
RGS2	3.74e-17	0.336949	0.346	0.216	8.51e-13		WTAP	3.1e-52	0.538322	0.551	0.255	7.05e-48		COLGALT1	3.80155e-44	0.3484	0.259	0.079	8.64587e-40		GLRX	2.19168e-58	0.555839	0.534	0.21	4.98454e-54		TPM3	6.79e-22	0.23562	0.707	0.557	1.55e-17		MT1G	1.08e-27	0.441469	0.143	0.04	2.46e-23
LY96	3.57e-36	0.336742	0.303	0.127	8.13e-32		CD300A	8.35e-58	0.536709	0.253	0.046	1.9e-53		LILRB1	3.17358e-33	0.348028	0.165	0.039	7.21767e-29		CNIH4	1.25639e-57	0.555479	0.495	0.183	2.8574e-53		TUBA1B	1.36e-19	0.234688	0.593	0.462	3.09e-15		RRAD	8.93e-35	0.441433	0.187	0.055	2.03e-30
APP	2.92e-27	0.33589	0.33	0.171	6.65e-23		SDC4	2.87e-60	0.53641	0.359	0.108	6.52e-56		APP	1.33024e-28	0.347667	0.338	0.171	3.02538e-24		SPATS2L	3.81965e-55	0.555366	0.606	0.271	8.68703e-51		DUSP3	2.37e-35	0.234617	0.234	0.103	5.38e-31		IL3RA	5.7e-35	0.440292	0.227	0.078	1.3e-30
GBP4	2.49e-30	0.335759	0.368	0.189	5.67e-26		RB1	5.87e-68	0.535324	0.488	0.179	1.33e-63		GNG5	2.19691e-41	0.345626	0.738	0.509	4.99644e-37		ADA2	3.14796e-53	0.554473	0.357	0.101	7.1594e-49		CTSA	2.2e-32	0.234212	0.377	0.218	5e-28		LRP1	4.03e-63	0.439062	0.383	0.126	9.16e-59
TPP1	2.39e-43	0.335534	0.375	0.162	5.44e-39		RASSF4	6.57e-59	0.535308	0.263	0.05	1.49e-54		SDC4	2.37803e-32	0.344698	0.266	0.108	5.40834e-28		CDKN1A	1.29299e-48	0.554423	0.686	0.355	2.94064e-44		HSP90B1	4.9e-18	0.232711	0.641	0.522	1.12e-13		SYK	2.19e-50	0.438245	0.342	0.122	4.99e-46
GLIPR2	3.72e-37	0.335419	0.349	0.159	8.46e-33		PPP1R15A	6.15e-49	0.53513	0.774	0.507	1.4e-44		LTBR	2.5796e-42	0.342312	0.244	0.074	5.86678e-38		IRF8	4.54344e-49	0.554352	0.354	0.106	1.03332e-44		RAB13	4.21e-26	0.232614	0.286	0.159	9.58e-22		ENO1	6.48e-36	0.437411	0.734	0.5	1.47e-31
ATF5	8.57e-40	0.335352	0.284	0.107	1.95e-35		VSIG4	1.26e-47	0.534112	0.154	0.009	2.86e-43		SYK	1.67453e-33	0.342232	0.225	0.077	3.80839e-29		DENND5A	1.96252e-63	0.553591	0.352	0.081	4.46336e-59		HSBP1	1.52e-33	0.232495	0.555	0.382	3.46e-29		H1F0	6.9e-56	0.437172	0.336	0.113	1.57e-51
AP2S1	8.26e-43	0.333929	0.505	0.272	1.88e-38		DSC3	5.94e-33	0.533058	0.13	0.017	1.35e-28		GLIPR2	7.73209e-39	0.341847	0.358	0.159	1.75851e-34		PPP1R15A	1.33614e-45	0.552045	0.811	0.507	3.03879e-41		FMN1	6.6e-25	0.232143	0.152	0.063	1.5e-20		CALB1	2.39e-44	0.437041	0.16	0.029	5.43e-40
TNC	3.01e-22	0.333175	0.138	0.043	6.85e-18		ARL5B	5.31e-63	0.532318	0.432	0.151	1.21e-58		VIM	9.40478e-22	0.341728	0.831	0.683	2.13893e-17		AP2S1	4.08004e-67	0.550576	0.634	0.272	9.27924e-63		PCBP1	8.8e-22	0.231552	0.643	0.488	2e-17		PIK3AP1	9.22e-47	0.436836	0.338	0.126	2.1e-42
CYTH4	2.2e-21	0.332991	0.182	0.075	5e-17		IRF8	4.37e-56	0.530207	0.35	0.106	9.93e-52		MYL9	8.31938e-22	0.341428	0.188	0.077	1.89208e-17		SERPINB2	1.84261e-35	0.550174	0.145	0.017	4.19065e-31		LEPROT	6.29e-31	0.23135	0.392	0.232	1.43e-26		ARRB2	1.68e-47	0.436435	0.428	0.185	3.82e-43
MEFV	1.09e-26	0.33142	0.118	0.023	2.48e-22		CSF2RB	7.77e-49	0.529421	0.22	0.043	1.77e-44		SLAMF7	6.39878e-23	0.341361	0.175	0.066	1.45527e-18		FGR	1.44295e-55	0.54947	0.258	0.042	3.2817e-51		TALDO1	2.98e-32	0.230569	0.435	0.264	6.78e-28		GNB4	1.67e-71	0.435256	0.395	0.125	3.81e-67
CASP1	2.73e-35	0.331372	0.355	0.168	6.21e-31		MIR205HG	1.89e-23	0.528397	0.131	0.033	4.31e-19		GM2A	7.17961e-43	0.341032	0.244	0.071	1.63286e-38		PDXK	1.91802e-60	0.54928	0.564	0.228	4.36216e-56		FPR2	6.93e-18	0.230231	0.152	0.076	1.58e-13		CTSA	3.03e-55	0.434034	0.49	0.218	6.88e-51
NNMT	1.82e-17	0.330905	0.2	0.099	4.15e-13		ALOX5	1.68e-54	0.528328	0.246	0.047	3.81e-50		CD300A	1.0851e-30	0.337519	0.17	0.046	2.46784e-26		IRAK3	2.83521e-63	0.549271	0.343	0.077	6.44811e-59		PPIB	1.48e-15	0.230208	0.662	0.557	3.36e-11		VCAN	2.28e-30	0.433946	0.265	0.111	5.18e-26
FGD4	3.49e-38	0.330318	0.179	0.04	7.93e-34		PTPN6	1.19e-50	0.527674	0.389	0.146	2.71e-46		SERPINF1	3.90447e-15	0.337074	0.146	0.065	8.87993e-11		RB1	1.68161e-66	0.548909	0.524	0.179	3.82448e-62		HEXA	1.61e-29	0.230177	0.361	0.211	3.67e-25		TFEC	9.39e-55	0.43313	0.267	0.072	2.13e-50
IRAK3	6.17e-37	0.33024	0.233	0.077	1.4e-32		SGPL1	2.39e-64	0.526418	0.297	0.063	5.43e-60		ADA2	2.4559e-32	0.336195	0.258	0.101	5.58546e-28		QKI	6.75003e-68	0.548716	0.605	0.232	1.53516e-63		CNDP2	4.9e-31	0.230083	0.407	0.244	1.11e-26		SLC1A3	4.48e-47	0.432697	0.26	0.079	1.02e-42
CDKN1A	1.33e-24	0.33006	0.536	0.355	3.03e-20		FGD4	5.38e-69	0.526016	0.269	0.04	1.22e-64		DRAM1	7.28983e-44	0.33601	0.233	0.064	1.65793e-39		LY96	2.67641e-64	0.548297	0.433	0.127	6.08697e-60		ITGB4	1.03e-16	0.229	0.105	0.045	2.34e-12		QKI	4.4e-54	0.432018	0.605	0.3	1e-49
SPRED1	4.46e-40	0.329962	0.18	0.038	1.01e-35		PTPN12	1.95e-77	0.524629	0.42	0.114	4.43e-73		RAB13	4.66147e-35	0.335472	0.286	0.115	1.06016e-30		ARL5B	9.00119e-56	0.548174	0.444	0.151	2.04714e-51		METRNL	5.06e-18	0.228642	0.53	0.391	1.15e-13		MMP3	2.72e-25	0.431841	0.128	0.034	6.19e-21
DRAM1	6.89e-42	0.327959	0.225	0.064	1.57e-37		CYSTM1	1.03e-72	0.524117	0.459	0.155	2.34e-68		PTPN6	1.0584e-26	0.33456	0.299	0.146	2.40712e-22		PHC2	6.96623e-62	0.547149	0.486	0.162	1.58433e-57		LAMP1	1.29e-31	0.228424	0.393	0.23	2.92e-27		TSPO	1.62e-46	0.431786	0.676	0.414	3.68e-42
CSF2RB	1.07e-25	0.327862	0.147	0.043	2.43e-21		SPATS2L	7.07e-59	0.523904	0.576	0.271	1.61e-54		GBP4	1.19131e-29	0.333345	0.37	0.189	2.70941e-25		ARL8B	1.19768e-64	0.546602	0.523	0.184	2.72389e-60		TOM1	5.94e-28	0.228352	0.264	0.138	1.35e-23		TALDO1	5.21e-56	0.431492	0.558	0.264	1.18e-51
DUSP6	4.53e-26	0.327199	0.256	0.115	1.03e-21		COL6A1	1.51e-19	0.522996	0.184	0.075	3.43e-15		TALDO1	2.24568e-41	0.331545	0.435	0.21	5.10734e-37		HIF1A	4.82095e-48	0.545967	0.707	0.371	1.09643e-43		UNC93B1	4.87e-29	0.227606	0.277	0.146	1.11e-24		PLIN2	6.78e-29	0.430467	0.443	0.245	1.54e-24
PDPN	5.38e-27	0.32602	0.17	0.055	1.22e-22		LACTB	5.25e-72	0.52266	0.372	0.094	1.19e-67		PRDX1	2.66273e-35	0.330863	0.679	0.484	6.05585e-31		RASGEF1B	2.2842e-55	0.545068	0.456	0.155	5.19495e-51		RIN2	7.81e-31	0.227192	0.237	0.112	1.78e-26		CASP1	6.81e-54	0.42909	0.497	0.222	1.55e-49
OTUD1	3.66e-23	0.325997	0.183	0.072	8.32e-19		CYBA	4.02e-34	0.522458	0.846	0.659	9.14e-30		CYTH4	2.75585e-21	0.330422	0.184	0.075	6.26764e-17		LAMP1	1.47395e-68	0.541602	0.518	0.173	3.3522e-64		DRAM1	1.12e-32	0.226917	0.233	0.107	2.55e-28		HIF1A	2e-36	0.428446	0.707	0.439	4.55e-32
ZNF267	3.67e-36	0.325995	0.361	0.167	8.34e-32		KCNMA1	6.21e-61	0.520582	0.245	0.037	1.41e-56		CD151	7.14622e-34	0.330302	0.319	0.143	1.62526e-29		P2RX4	2.03957e-59	0.541463	0.32	0.069	4.63859e-55		GLIPR2	1.15e-28	0.226224	0.358	0.21	2.61e-24		BLVRB	1.94e-56	0.428233	0.411	0.16	4.41e-52
CYSTM1	2.14e-43	0.325484	0.36	0.155	4.86e-39		PDXK	1.45e-62	0.519881	0.53	0.228	3.29e-58		CASP1	3.11251e-36	0.330036	0.362	0.168	7.07878e-32		GLIPR2	2.88455e-65	0.539963	0.488	0.159	6.56034e-61		ASPH	2.17e-29	0.225251	0.293	0.159	4.95e-25		ZNF267	3.51e-44	0.427521	0.479	0.228	7.99e-40
IGFBP4	3.08e-22	0.325479	0.243	0.117	7e-18		OLFML2B	9.78e-54	0.519416	0.224	0.037	2.23e-49		PDIA3	6.00075e-27	0.329627	0.626	0.439	1.36475e-22		CALR	6.84321e-43	0.539398	0.698	0.425	1.55635e-38		PRSS23	2.58e-18	0.224438	0.18	0.096	5.87e-14		SH3BP5	1.01e-47	0.42715	0.396	0.165	2.31e-43
YBX1	1.63e-29	0.325267	0.656	0.457	3.7e-25		TCIRG1	2.94e-60	0.519358	0.581	0.266	6.69e-56		CORO1C	2.46179e-45	0.329159	0.288	0.096	5.59886e-41		FGD4	1.20419e-72	0.539244	0.298	0.04	2.7387e-68		TMSB10	9.23e-31	0.223912	0.98	0.951	2.1e-26		DENND5A	6.71e-49	0.425353	0.352	0.134	1.53e-44
RAB13	1.53e-33	0.325071	0.278	0.115	3.49e-29		CALR	1.23e-49	0.519309	0.686	0.425	2.81e-45		SMIM3	4.6268e-36	0.32876	0.282	0.11	1.05227e-31		PERP	1.01191e-13	0.536618	0.261	0.149	2.30138e-09		IL4I1	9.68e-23	0.223639	0.165	0.075	2.2e-18		CD151	2.04e-40	0.424848	0.389	0.181	4.64e-36
CD300A	3.37e-29	0.324832	0.164	0.046	7.67e-25		HIF1A	2.2e-55	0.518301	0.687	0.371	5.01e-51		IGFBP4	3.45544e-23	0.328653	0.249	0.117	7.85871e-19		ALOX5	1.3974e-51	0.535652	0.256	0.047	3.17811e-47		AEBP1	6.65e-21	0.222892	0.199	0.102	1.51e-16		GLIPR2	3.2e-55	0.42434	0.488	0.21	7.29e-51
S100A4	7e-38	0.324707	0.708	0.472	1.59e-33		P4HB	4.02e-55	0.518296	0.554	0.272	9.14e-51		KRT6B	2.66745e-10	0.328471	0.123	0.061	6.06658e-06		HNMT	2.53129e-61	0.533337	0.264	0.04	5.75691e-57		CNIH4	9.3e-28	0.22283	0.396	0.245	2.12e-23		METRNL	1.84e-33	0.424032	0.634	0.391	4.18e-29
DENND5A	4.08e-39	0.324582	0.247	0.081	9.29e-35		PLSCR1	2.97e-68	0.517638	0.703	0.363	6.76e-64		SPRED1	2.58372e-42	0.32807	0.188	0.038	5.87615e-38		AC090617.10	8.20887e-44	0.532897	0.177	0.02	1.86694e-39		H1F0	2.13e-30	0.222667	0.236	0.113	4.85e-26		PDXK	3.51e-49	0.42388	0.564	0.291	7.99e-45
PRDX1	5.14e-35	0.324209	0.677	0.484	1.17e-30		CD80	5.24e-53	0.51685	0.231	0.04	1.19e-48		LAMP2	1.47826e-42	0.32692	0.354	0.147	3.36201e-38		TALDO1	2.2182e-64	0.532468	0.558	0.21	5.04486e-60		SMIM3	2.56e-25	0.222327	0.282	0.158	5.83e-21		RB1	3.73e-54	0.423519	0.524	0.24	8.49e-50
PRELID1	1.51e-39	0.322926	0.546	0.321	3.43e-35		PNRC1	4.23e-30	0.515122	0.87	0.714	9.61e-26		HTRA1	6.06465e-24	0.326414	0.221	0.096	1.37928e-19		SGPL1	8.88246e-65	0.532192	0.321	0.063	2.02014e-60		CCL4	1.36e-20	0.222247	0.555	0.421	3.09e-16		ATP6V0D1	1.24e-51	0.423404	0.531	0.253	2.82e-47
HRH2	3.08e-24	0.32283	0.143	0.042	7e-20		PHC2	1.18e-65	0.512376	0.46	0.162	2.69e-61		DUSP6	6.07142e-28	0.326374	0.266	0.115	1.38082e-23		COL6A1	5.36225e-19	0.531819	0.194	0.075	1.21954e-14		NME2	6.75e-17	0.221901	0.653	0.549	1.54e-12		RHOB	6.08e-50	0.421819	0.617	0.319	1.38e-45
QKI	2.58e-41	0.32239	0.461	0.232	5.88e-37		SLC40A1	1.17e-35	0.511869	0.157	0.027	2.67e-31		UNC93B1	3.40755e-39	0.32597	0.277	0.1	7.74979e-35		BNIP3L	9.90523e-50	0.531077	0.433	0.156	2.25275e-45		SERPINB5	1.16e-16	0.221705	0.101	0.041	2.64e-12		BCAT1	4.48e-64	0.421435	0.308	0.083	1.02e-59
GPX4	2.12e-34	0.321725	0.594	0.376	4.83e-30		MAN2B1	2.48e-59	0.511815	0.374	0.121	5.64e-55		HSBP1	9.72161e-44	0.325843	0.555	0.316	2.21098e-39		S100A8	1.20185e-117	0.530958	0.598	0.141	2.73337e-113		CPM	7.52e-23	0.221261	0.181	0.087	1.71e-18		TRPM2	9.66e-48	0.421398	0.233	0.062	2.2e-43
POMP	5.26e-34	0.321638	0.669	0.461	1.2e-29		CORO1C	9.63e-74	0.511164	0.374	0.096	2.19e-69		QKI	4.299e-42	0.325831	0.469	0.232	9.77722e-38		PTHLH	3.10794e-25	0.530397	0.17	0.048	7.06839e-21		TUBA1C	1.57e-27	0.221049	0.393	0.249	3.57e-23		SGPL1	2.26e-55	0.420761	0.321	0.104	5.15e-51
LACTB	2.96e-42	0.321395	0.276	0.094	6.74e-38		LILRB5	9.56e-44	0.510675	0.148	0.011	2.18e-39		GPX4	1.93945e-34	0.325735	0.599	0.376	4.41089e-30		CD4	5.14525e-45	0.52843	0.338	0.105	1.17019e-40		NPTN	1.78e-32	0.220999	0.332	0.184	4.04e-28		ADA2	2.91e-39	0.420459	0.357	0.155	6.63e-35
TALDO1	4.8e-39	0.321026	0.423	0.21	1.09e-34		SPRED1	3.1e-67	0.510253	0.26	0.038	7.06e-63		HRH2	1.3948e-24	0.325699	0.145	0.042	3.17218e-20		KRT17	3.07356e-24	0.526307	0.317	0.151	6.99019e-20		VIM	1.06e-11	0.220715	0.831	0.738	2.41e-07		ZYX	4.91e-48	0.420373	0.618	0.337	1.12e-43
PLEC	1.38e-30	0.320997	0.447	0.25	3.14e-26		GPX4	1.2e-65	0.509368	0.706	0.376	2.72e-61		FGD4	4.08714e-40	0.325653	0.186	0.04	9.29539e-36		KCNMA1	6.09996e-62	0.524482	0.264	0.037	1.38731e-57		TRPM2	2.47e-20	0.220569	0.14	0.062	5.62e-16		ARL5B	2.36e-41	0.420355	0.444	0.212	5.37e-37
SMIM3	4.84e-35	0.320815	0.276	0.11	1.1e-30		C1S	7.8e-31	0.508371	0.242	0.088	1.77e-26		TFEC	1.05997e-33	0.32557	0.156	0.033	2.41069e-29		SPRED1	9.15158e-69	0.523737	0.282	0.038	2.08134e-64		COL4A1	2.79e-14	0.220482	0.179	0.102	6.34e-10		SPHK1	2.03e-63	0.419847	0.441	0.159	4.63e-59
PCOLCE	4.02e-13	0.320407	0.12	0.053	9.15e-09		ARL8B	2.48e-72	0.508026	0.507	0.184	5.64e-68		ATF5	2.7262e-40	0.325408	0.289	0.107	6.20019e-36		DST	9.43039e-33	0.523547	0.271	0.094	2.14475e-28		PRDX1	9.96e-25	0.220286	0.679	0.55	2.26e-20		LAMP1	5.69e-57	0.419746	0.518	0.23	1.29e-52
MYL9	1.1e-19	0.319559	0.179	0.077	2.5e-15		ST14	5.46e-65	0.505184	0.272	0.046	1.24e-60		PCOLCE	3.68336e-13	0.325383	0.121	0.053	8.37706e-09		GSTP1	3.23831e-41	0.522782	0.714	0.417	7.3649e-37		ARPC5	2.34e-23	0.220087	0.645	0.484	5.33e-19		CPM	6.05e-40	0.418952	0.254	0.087	1.38e-35
PSME2	8.07e-28	0.319281	0.72	0.529	1.84e-23		SDC1	3.13e-21	0.504352	0.17	0.065	7.11e-17		OTUD1	6.7844e-24	0.325366	0.187	0.072	1.54298e-19		LPAR6	4.78294e-51	0.522512	0.313	0.078	1.08778e-46		PHC2	5.43e-28	0.219866	0.362	0.213	1.23e-23		HEXA	1.47e-50	0.41853	0.471	0.211	3.33e-46
ITGA5	3.8e-33	0.318503	0.274	0.112	8.64e-29		PARP14	5.03e-50	0.50261	0.694	0.384	1.14e-45		MEFV	3.99099e-27	0.325011	0.12	0.023	9.0767e-23		LTBR	1.17285e-67	0.521024	0.345	0.074	2.66742e-63		ADAM8	2.98e-26	0.219839	0.264	0.14	6.77e-22		LPAR6	8.81e-40	0.417989	0.313	0.123	2e-35
SMIM25	2.18e-34	0.318231	0.157	0.032	4.97e-30		RAB7A	3.22e-67	0.502048	0.592	0.263	7.33e-63		PRELID1	2.07503e-39	0.324767	0.55	0.321	4.71924e-35		CSF2RB	4.66904e-44	0.519442	0.222	0.043	1.06188e-39		CLIC1	8.28e-24	0.219835	0.697	0.552	1.88e-19		CD4	9.55e-38	0.417482	0.338	0.143	2.17e-33
PPP1R15A	5.28e-25	0.317837	0.687	0.507	1.2e-20		PRDX1	9.3e-60	0.501085	0.752	0.484	2.12e-55		ITGA6	8.07571e-06	0.324368	0.171	0.123	0.183666		SNX8	3.23368e-63	0.518859	0.317	0.062	7.35436e-59		ATP6V0D1	2.21e-31	0.219596	0.422	0.253	5.04e-27		PPP1R15A	8.15e-36	0.41586	0.811	0.565	1.85e-31
BST2	4.44e-23	0.316201	0.641	0.455	1.01e-18		ZFP36L1	1.07e-44	0.500976	0.706	0.43	2.43e-40		TSPO	2.64015e-35	0.323929	0.569	0.349	6.0045e-31		LAMP2	2.40723e-67	0.517007	0.474	0.147	5.47477e-63		SSB	1.04e-21	0.21947	0.438	0.294	2.37e-17		AC007952.4	6.99e-31	0.415651	0.205	0.073	1.59e-26
LTBR	1.72e-38	0.31602	0.231	0.074	3.92e-34		LPAR6	1.38e-53	0.500014	0.298	0.078	3.13e-49		ZNF267	2.89038e-36	0.323836	0.366	0.167	6.5736e-32		NRP1	3.23178e-63	0.516739	0.329	0.069	7.35003e-59		PLIN2	6.47e-18	0.219074	0.365	0.245	1.47e-13		BLVRA	2.5e-63	0.414894	0.441	0.167	5.69e-59
CYBA	1.93e-16	0.316019	0.801	0.659	4.38e-12		PDPN	3.56e-44	0.499115	0.229	0.055	8.11e-40		DENND5A	2.52344e-39	0.322998	0.25	0.081	5.73905e-35		SEMA4A	4.05192e-56	0.516244	0.259	0.044	9.21529e-52		GM2A	1.57e-31	0.218881	0.244	0.116	3.57e-27		ARL8B	2.16e-49	0.41306	0.523	0.251	4.91e-45
PTPN12	1.33e-44	0.315654	0.314	0.114	3.03e-40		LAPTM4A	2.55e-50	0.498608	0.566	0.289	5.79e-46		TPM3	1.13492e-28	0.321449	0.707	0.502	2.58115e-24		TSPO	1.28712e-53	0.516229	0.676	0.349	2.92729e-49		EFHD2	1.3e-23	0.218513	0.568	0.405	2.96e-19		CHMP1B	1.33e-39	0.412575	0.551	0.293	3.02e-35
RASSF4	2e-33	0.315413	0.183	0.05	4.54e-29		ATP6V0D1	2.37e-71	0.497601	0.515	0.194	5.38e-67		ENO1	4.99819e-29	0.321226	0.649	0.441	1.13674e-24		LAPTM4A	5.42419e-47	0.514876	0.595	0.289	1.23362e-42		IL3RA	5.75e-17	0.218294	0.153	0.078	1.31e-12		NRP1	6.95e-54	0.410328	0.329	0.11	1.58e-49
UNC93B1	1.5e-37	0.315305	0.269	0.1	3.41e-33		GNG5	1.24e-66	0.497329	0.814	0.509	2.83e-62		SLC1A3	5.40202e-29	0.320385	0.178	0.055	1.22858e-24		ZFP36L1	3.92004e-41	0.514649	0.733	0.43	8.91535e-37		MT-ND4	2.82e-13	0.218092	0.97	0.948	6.41e-09		SLAMF7	1.44e-30	0.410141	0.259	0.106	3.27e-26
SGPL1	2.49e-35	0.315291	0.207	0.063	5.67e-31		LAMP2	1.93e-68	0.497059	0.44	0.147	4.38e-64		CSF2RB	6.4515e-26	0.320194	0.149	0.043	1.46726e-21		THAP2	1.95139e-41	0.513756	0.202	0.036	4.43805e-37		LYN	6.91e-28	0.217786	0.354	0.206	1.57e-23		PGD	2.49e-51	0.410097	0.493	0.224	5.66e-47
GBP2	1.88e-35	0.314809	0.435	0.223	4.27e-31		TALDO1	1.28e-64	0.496929	0.518	0.21	2.91e-60		SGPL1	1.51537e-36	0.31985	0.213	0.063	3.44641e-32		PTPN6	6.17061e-44	0.513714	0.397	0.146	1.40338e-39		RHOQ	9.53e-26	0.217485	0.295	0.167	2.17e-21		CNIH4	1.34e-44	0.406852	0.495	0.245	3.05e-40
P2RX4	3.71e-34	0.31457	0.215	0.069	8.45e-30		TUBA1C	1.15e-63	0.495854	0.485	0.192	2.61e-59		RASSF4	7.12517e-35	0.319294	0.189	0.05	1.62048e-30		CD80	3.90123e-49	0.513336	0.235	0.04	8.87256e-45		COLGALT1	1.07e-31	0.2165	0.259	0.127	2.44e-27		THAP2	2.81e-32	0.406686	0.202	0.068	6.4e-28
HSBP1	6.94e-42	0.313238	0.546	0.316	1.58e-37		UPP1	7.7e-63	0.495576	0.482	0.181	1.75e-58		CYBA	5.12761e-16	0.318614	0.802	0.659	1.16617e-11		PNRC1	5.15869e-25	0.512902	0.888	0.714	1.17324e-20		SH3BP5	1.17e-21	0.216196	0.278	0.165	2.66e-17		SNX8	1.6e-47	0.406449	0.317	0.113	3.64e-43
PTTG1IP	1.35e-41	0.312455	0.395	0.183	3.06e-37		PTTG1IP	9.46e-73	0.495096	0.502	0.183	2.15e-68		NRP1	1.24396e-41	0.318207	0.238	0.069	2.82914e-37		ATP6V0D1	4.29553e-63	0.512809	0.531	0.194	9.76933e-59		BLVRB	1.22e-30	0.215573	0.299	0.16	2.78e-26		TPM3	3.72e-38	0.406375	0.814	0.557	8.47e-34
SDC4	1.68e-29	0.312315	0.254	0.108	3.83e-25		YBX1	1.98e-47	0.493881	0.722	0.457	4.5e-43		PTTG1IP	4.66085e-43	0.317678	0.404	0.183	1.06002e-38		MMP3	7.68642e-21	0.51265	0.128	0.031	1.74812e-16		RHOC	3.73e-24	0.215571	0.392	0.252	8.49e-20		ATF5	2.24e-57	0.406204	0.419	0.161	5.1e-53
NRP1	1.62e-39	0.31193	0.229	0.069	3.68e-35		AC090617.10	3.34e-43	0.493857	0.165	0.02	7.61e-39		TPI1	3.97997e-31	0.317513	0.682	0.475	9.05164e-27		SH3BP5	9.57363e-58	0.51196	0.396	0.116	2.17733e-53		TAP1	4.64e-18	0.215361	0.598	0.463	1.05e-13		ALOX5	4.27e-41	0.405727	0.256	0.085	9.72e-37
IRF8	2.37e-27	0.311651	0.247	0.106	5.4e-23		TSPO	3.5e-59	0.493627	0.653	0.349	7.95e-55		PDK4	4.32048e-27	0.31707	0.158	0.045	9.82606e-23		CPM	5.25803e-50	0.51069	0.254	0.049	1.19583e-45		KDELR1	1.41e-20	0.215086	0.409	0.285	3.2e-16		CCDC88A	4.48e-57	0.404406	0.372	0.134	1.02e-52
ARL8B	3.99e-41	0.310809	0.398	0.184	9.08e-37		THAP2	3.98e-42	0.493148	0.191	0.036	9.05e-38		S100A4	6.62845e-36	0.315069	0.709	0.472	1.50751e-31		TUBA1B	1.00375e-42	0.510626	0.701	0.409	2.28282e-38		RAB7A	1.9e-30	0.214963	0.509	0.333	4.32e-26		CDCP1	4.03e-59	0.40433	0.277	0.073	9.15e-55
EPSTI1	9.55e-34	0.30846	0.582	0.359	2.17e-29		HSBP1	2.64e-75	0.493102	0.657	0.316	6e-71		IRF8	2.68273e-27	0.314896	0.249	0.106	6.10133e-23		TNS4	2.38134e-32	0.510406	0.172	0.035	5.41589e-28		NAIP	6.91e-21	0.214598	0.229	0.128	1.57e-16		NEAT1	2.56e-38	0.403924	0.939	0.764	5.83e-34
SH2B3	5.32e-34	0.308208	0.235	0.083	1.21e-29		BHLHE40	2e-51	0.49227	0.541	0.254	4.54e-47		ITGA5	1.11354e-33	0.314839	0.279	0.112	2.53252e-29		SLC40A1	2.52023e-34	0.509643	0.163	0.027	5.73176e-30		PALLD	1.06e-21	0.214574	0.187	0.095	2.42e-17		LRRK2	2.07e-40	0.402981	0.198	0.053	4.71e-36
TSPO	4.77e-34	0.308147	0.562	0.349	1.08e-29		GCA	8.7e-58	0.490768	0.364	0.112	1.98e-53		RASGEF1B	5.75134e-27	0.314602	0.317	0.155	1.30803e-22		CDH3	1.0219e-34	0.509265	0.148	0.019	2.3241e-30		SLC7A8	1.68e-29	0.214145	0.12	0.035	3.83e-25		FGD4	8.87e-65	0.40215	0.298	0.077	2.02e-60
NADK	7.56e-34	0.307493	0.223	0.076	1.72e-29		PRELID1	3.12e-63	0.490297	0.63	0.321	7.1e-59		IRAK3	1.23709e-36	0.314597	0.235	0.077	2.81351e-32		MKNK1	1.40849e-66	0.50736	0.379	0.09	3.20334e-62		CLEC4E	1.84e-16	0.213964	0.132	0.064	4.18e-12		CFD	3.84e-53	0.400829	0.268	0.073	8.74e-49
LAMP2	5.14e-40	0.306909	0.343	0.147	1.17e-35		LTBR	1.2e-63	0.490244	0.31	0.074	2.72e-59		PSME2	1.30367e-27	0.313811	0.723	0.529	2.96494e-23		RAB7A	2.17818e-59	0.506165	0.613	0.263	4.95383e-55		CMKLR1	2.92e-22	0.213852	0.157	0.071	6.64e-18		TNC	2.55e-33	0.400826	0.195	0.062	5.79e-29
TPM3	2.19e-27	0.306589	0.698	0.502	4.99e-23		GNAQ	1.59e-68	0.490193	0.371	0.101	3.62e-64		PHC2	2.59876e-37	0.313691	0.362	0.162	5.91036e-33		PIK3AP1	8.00355e-53	0.505789	0.338	0.09	1.82025e-48		COL18A1	3.74e-08	0.213212	0.175	0.12	0.000851505		ZFP36L1	1.39e-34	0.398659	0.733	0.486	3.16e-30
OGFRL1	2.55e-34	0.305587	0.232	0.08	5.79e-30		ZEB2	9.51e-55	0.488027	0.567	0.266	2.16e-50		COL4A2	5.63648e-17	0.313058	0.193	0.092	1.28191e-12		GNAQ	1.32076e-67	0.505082	0.399	0.101	3.00382e-63		PCOLCE	9.47e-09	0.212761	0.121	0.075	0.000215336		M6PR	1.15e-46	0.397628	0.496	0.24	2.61e-42
PLSCR1	5.9e-36	0.30529	0.588	0.363	1.34e-31		NRP1	3.53e-65	0.487415	0.311	0.069	8.03e-61		CPM	1.01112e-32	0.312999	0.181	0.049	2.29959e-28		JDP2	5.8098e-68	0.504472	0.333	0.064	1.32132e-63		BLVRA	1.55e-35	0.212723	0.321	0.167	3.52e-31		AK4	4.48e-45	0.397438	0.191	0.045	1.02e-40
OAZ1	1.35e-27	0.305177	0.865	0.736	3.06e-23		SH3BP5	7.65e-59	0.487338	0.37	0.116	1.74e-54		AEBP1	1.13003e-20	0.312722	0.199	0.087	2.57004e-16		OLFML2B	8.80933e-48	0.504243	0.222	0.037	2.00351e-43		BSG	2.13e-20	0.212415	0.418	0.289	4.85e-16		GLRX	9.67e-43	0.39722	0.534	0.279	2.2e-38
TCIRG1	1.48e-31	0.304528	0.471	0.266	3.38e-27		ATG3	2.75e-68	0.487219	0.456	0.155	6.26e-64		SMIM25	2.14023e-34	0.312047	0.158	0.032	4.86752e-30		GBP4	3.84917e-46	0.501874	0.474	0.189	8.75416e-42		RAB5IF	2.97e-24	0.212371	0.483	0.335	6.76e-20		GNB2	1.55e-47	0.395756	0.625	0.345	3.53e-43
GPR84	4.54e-27	0.304481	0.114	0.019	1.03e-22		BNIP3L	1.55e-49	0.485359	0.402	0.156	3.52e-45		GBP2	1.81128e-35	0.312015	0.44	0.223	4.1194e-31		CORO1C	5.92391e-67	0.501645	0.387	0.096	1.34728e-62		PYCARD	1.6e-32	0.212054	0.441	0.271	3.63e-28		LAPTM4A	1.88e-38	0.395711	0.595	0.346	4.29e-34
TPM1	1.03e-24	0.304453	0.259	0.123	2.34e-20		RIPK2	2.27e-56	0.484918	0.405	0.142	5.17e-52		PPP1R15A	1.75873e-24	0.311118	0.691	0.507	3.99989e-20		AP2M1	1.34642e-47	0.500692	0.55	0.255	3.06215e-43		NRP1	4.12e-32	0.211796	0.238	0.11	9.37e-28		CLCA2	5.04e-44	0.395328	0.143	0.021	1.15e-39
ANXA4	2.41e-38	0.304403	0.274	0.102	5.49e-34		TIMP3	5.58e-27	0.483894	0.197	0.069	1.27e-22		CDKN1A	2.85235e-24	0.311111	0.54	0.355	6.48709e-20		SLC7A8	8.07946e-63	0.499319	0.221	0.017	1.83751e-58		GPX4	1.57e-22	0.210518	0.599	0.445	3.58e-18		CALU	4.36e-35	0.395137	0.392	0.196	9.92e-31
ADAM17	8.28e-36	0.303706	0.262	0.098	1.88e-31		SLC1A3	8.5e-49	0.483498	0.243	0.055	1.93e-44		SSB	1.90732e-31	0.310841	0.438	0.233	4.33782e-27		SDC3	1.39377e-68	0.498537	0.264	0.028	3.16985e-64		ACTB	2.77e-28	0.210488	0.972	0.947	6.3e-24		SDC3	3.06e-66	0.394654	0.264	0.056	6.96e-62
PHC2	1.18e-35	0.303171	0.353	0.162	2.68e-31		HEXA	1.63e-65	0.483441	0.45	0.156	3.7e-61		POMP	3.21173e-33	0.310494	0.671	0.461	7.30443e-29		PLSCR1	2.2955e-57	0.497734	0.722	0.363	5.22066e-53		IGFBP4	2.35e-17	0.210123	0.249	0.151	5.35e-13		FGR	5.85e-43	0.3945	0.258	0.083	1.33e-38
DNAJC15	3.69e-29	0.302918	0.523	0.32	8.39e-25		SDC3	2.15e-65	0.482303	0.24	0.028	4.89e-61		NADK	7.95094e-35	0.309652	0.228	0.076	1.80828e-30		MAN2B1	2.23417e-52	0.494015	0.383	0.121	5.08118e-48		AC090617.10	1.39e-17	0.2099	0.111	0.046	3.15e-13		TPI1	1.07e-31	0.39363	0.753	0.542	2.42e-27
WTAP	6.94e-27	0.301779	0.447	0.255	1.58e-22		GPR84	2.94e-50	0.480951	0.183	0.019	6.7e-46		ATP6V0D1	3.49336e-43	0.309	0.422	0.194	7.94495e-39		CYSTM1	3.41226e-69	0.493775	0.487	0.155	7.76049e-65		ARRB2	5.04e-23	0.209859	0.31	0.185	1.15e-18		PDIA4	5.43e-40	0.393351	0.395	0.188	1.23e-35
CPM	7.05e-32	0.301767	0.177	0.049	1.6e-27		IFIH1	6.79e-59	0.480755	0.452	0.167	1.55e-54		PRSS23	3.61298e-19	0.3089	0.18	0.078	8.21699e-15		CCDC88A	2.66378e-67	0.49375	0.372	0.087	6.05823e-63		VAMP8	2.53e-19	0.209569	0.568	0.432	5.75e-15		CD80	8.16e-40	0.392749	0.235	0.075	1.86e-35
PDIA3	1.4e-25	0.301759	0.619	0.439	3.18e-21		EPSTI1	2.01e-57	0.480336	0.678	0.359	4.56e-53		WTAP	2.57317e-27	0.308723	0.453	0.255	5.85217e-23		GNG5	5.22871e-54	0.493085	0.829	0.509	1.18916e-49		QKI	2.86e-28	0.209133	0.469	0.3	6.51e-24		SPRED1	4.13e-60	0.392625	0.282	0.074	9.39e-56
TPI1	1.25e-30	0.301634	0.678	0.475	2.84e-26		SEMA4A	3.5e-53	0.478583	0.234	0.044	7.96e-49		DNAJC15	6.70155e-30	0.308414	0.53	0.32	1.52413e-25		SLC1A3	1.26341e-48	0.492938	0.26	0.055	2.87337e-44		PTTG1IP	7.34e-31	0.208812	0.404	0.242	1.67e-26		RNF149	1.02e-30	0.392111	0.712	0.467	2.31e-26
EHBP1L1	9.41e-32	0.301069	0.321	0.149	2.14e-27		FERMT1	1.03e-26	0.478275	0.144	0.035	2.35e-22		EMP3	1.14365e-27	0.307805	0.634	0.436	2.601e-23		LACTB	7.65824e-62	0.49231	0.373	0.094	1.74171e-57		GNG5	1.4e-25	0.208757	0.738	0.585	3.18e-21		HTRA1	2.59e-30	0.391792	0.27	0.115	5.88e-26
BNIP3L	4.49e-29	0.301008	0.321	0.156	1.02e-24		PSTPIP2	3.74e-61	0.476726	0.257	0.044	8.5e-57		FERMT1	8.04683e-15	0.307467	0.101	0.035	1.83009e-10		TPM3	1.27591e-44	0.492204	0.814	0.502	2.90179e-40		EMP3	1.21e-18	0.208548	0.634	0.5	2.74e-14		ARPC5	7.46e-41	0.391158	0.761	0.484	1.7e-36
IGFLR1	1.15e-26	0.30093	0.264	0.12	2.62e-22		KCNE1	3.88e-41	0.475692	0.144	0.012	8.81e-37		TMSB10	9.64971e-42	0.307455	0.98	0.933	2.19463e-37		NEAT1	6.84828e-46	0.491784	0.939	0.718	1.5575e-41		SGPL1	3.41e-26	0.208419	0.213	0.104	7.76e-22		TP63	9.71e-48	0.390549	0.149	0.021	2.21e-43
AEBP1	3.22e-18	0.300784	0.188	0.087	7.32e-14		CCDC88A	8.24e-70	0.475125	0.351	0.087	1.87e-65		ACTB	7.54339e-40	0.307278	0.972	0.931	1.71559e-35		GBP2	1.19977e-50	0.491673	0.543	0.223	2.72865e-46		WTAP	1.61e-18	0.207822	0.453	0.313	3.66e-14		PSTPIP2	5.77e-58	0.390541	0.285	0.077	1.31e-53
PARP14	2.23e-28	0.300485	0.597	0.384	5.06e-24		YBX3	1.79e-52	0.474605	0.576	0.281	4.07e-48		PCBP1	4.98111e-28	0.307209	0.643	0.43	1.13285e-23		PSTPIP2	1.88263e-64	0.490448	0.285	0.044	4.28166e-60		HRH2	1.9e-16	0.207606	0.145	0.074	4.33e-12		MAN2B1	6.34e-41	0.390421	0.383	0.172	1.44e-36
EMP3	1.28e-27	0.300356	0.631	0.436	2.91e-23		COL6A2	2.26e-19	0.474551	0.212	0.095	5.13e-15		ASPH	5.50037e-37	0.306717	0.293	0.116	1.25095e-32		PSMD2	3.95256e-31	0.489518	0.461	0.235	8.98931e-27		AK4	1.09e-24	0.207504	0.124	0.045	2.47e-20		HSBP1	3.27e-54	0.390321	0.675	0.382	7.43e-50
PDK4	1.5e-26	0.300083	0.155	0.045	3.41e-22		EHBP1L1	3.63e-58	0.473808	0.42	0.149	8.26e-54		PTPN12	1.52607e-45	0.306388	0.321	0.114	3.47075e-41		RALGDS	2.01308e-44	0.488679	0.428	0.16	4.57835e-40		MKNK1	1.21e-32	0.207429	0.247	0.115	2.75e-28		IRAK3	4.09e-47	0.389452	0.343	0.129	9.29e-43
SSB	7.14e-31	0.299802	0.432	0.233	1.62e-26		GAA	4.58e-56	0.47311	0.294	0.074	1.04e-51		LACTB	2.6882e-41	0.306211	0.277	0.094	6.11377e-37		DCN	2.58733e-14	0.488569	0.15	0.06	5.88436e-10		TKT	9.62e-28	0.207278	0.326	0.188	2.19e-23		SEMA4A	1.25e-44	0.38852	0.259	0.082	2.85e-40
ERRFI1	3.64e-28	0.299754	0.225	0.089	8.28e-24		SH2B3	1.23e-57	0.47164	0.317	0.083	2.79e-53		SH2B3	1.18578e-34	0.305946	0.24	0.083	2.69683e-30		GAA	6.19169e-54	0.488004	0.31	0.074	1.40818e-49		RNF144B	3.28e-29	0.206694	0.254	0.125	7.46e-25		PAK1	2.15e-53	0.387947	0.352	0.124	4.89e-49
ZEB2	5.29e-30	0.299539	0.464	0.266	1.2e-25		RALGDS	4.35e-48	0.470628	0.408	0.16	9.89e-44		TCIRG1	3.73781e-32	0.305748	0.478	0.266	8.50091e-28		HEXA	3.04e-60	0.487668	0.471	0.156	6.91387e-56		TRAPPC5	1.58e-32	0.206493	0.43	0.259	3.59e-28		CDKN1A	1.17e-38	0.387929	0.686	0.411	2.67e-34
ACTB	2.05e-39	0.298937	0.973	0.931	4.67e-35		OAZ1	5.23e-54	0.470595	0.907	0.736	1.19e-49		AP2M1	3.93061e-33	0.305423	0.46	0.255	8.93938e-29		PTTG1IP	1.17844e-61	0.487371	0.511	0.183	2.68013e-57		RASSF4	4.71e-26	0.206372	0.189	0.086	1.07e-21		HPSE	4.41e-50	0.387429	0.225	0.055	1e-45
UBE2F	1.1e-42	0.298708	0.35	0.145	2.49e-38		PRNP	7.14e-35	0.470576	0.416	0.207	1.62e-30		ANXA4	4.14198e-39	0.305289	0.279	0.102	9.42009e-35		AC105460.1	5.78719e-33	0.486843	0.159	0.027	1.31618e-28		SDCCAG8	1.49e-29	0.20608	0.254	0.127	3.39e-25		SLC40A1	1.33e-25	0.386855	0.163	0.055	3.02e-21
GNAQ	1.44e-38	0.298495	0.274	0.101	3.28e-34		CSF3R	1.94e-47	0.468988	0.181	0.022	4.4e-43		OGFRL1	5.61936e-36	0.304322	0.24	0.08	1.27801e-31		GJB2	3.25029e-38	0.486146	0.186	0.033	7.39214e-34		BCAT1	9.73e-31	0.205901	0.196	0.083	2.21e-26		SPATS2L	1.11e-41	0.385935	0.606	0.338	2.52e-37
JDP2	1.73e-37	0.298023	0.215	0.064	3.95e-33		TRAF1	1.7e-36	0.468342	0.298	0.113	3.86e-32		ARL8B	3.12286e-41	0.303956	0.403	0.184	7.10232e-37		PTPN12	7.53051e-72	0.484892	0.44	0.114	1.71266e-67		BHLHE40	3.87e-19	0.205776	0.457	0.319	8.79e-15		GNAQ	1.01e-55	0.385408	0.399	0.149	2.31e-51
GRASP	1.92e-19	0.297736	0.308	0.173	4.36e-15		CD4	1.76e-44	0.468143	0.313	0.105	4e-40		CYSTM1	3.68063e-44	0.303885	0.368	0.155	8.37086e-40		RGS2	4.91362e-26	0.484731	0.424	0.216	1.1175e-21		PGD	4.51e-29	0.20548	0.378	0.224	1.03e-24		HNMT	2.96e-49	0.384929	0.264	0.08	6.74e-45
ATP6V0D1	1.9e-41	0.297475	0.411	0.194	4.33e-37		GBP2	8.52e-56	0.467613	0.522	0.223	1.94e-51		PARP14	5.2909e-28	0.303811	0.602	0.384	1.20331e-23		GPR84	1.56423e-51	0.484688	0.198	0.019	3.55753e-47		HNMT	3.74e-26	0.204529	0.179	0.08	8.5e-22		CLIC1	9.44e-38	0.384595	0.785	0.552	2.15e-33
PNRC1	7.39e-15	0.297275	0.842	0.714	1.68e-10		ANXA4	6.31e-67	0.46745	0.368	0.102	1.43e-62		TUBA1B	2.59603e-24	0.302983	0.593	0.409	5.90415e-20		CDCP1	1.14535e-59	0.48453	0.277	0.047	2.60488e-55		PRELID1	1.08e-25	0.20445	0.55	0.395	2.46e-21		GAS6	5.31e-51	0.384577	0.343	0.126	1.21e-46
ALOX5	1.21e-26	0.297239	0.158	0.047	2.76e-22		GNA13	1.05e-52	0.466626	0.495	0.214	2.39e-48		PRNP	1.39634e-23	0.302196	0.365	0.207	3.1757e-19		HSBP1	8.42842e-64	0.48367	0.675	0.316	1.91688e-59		LILRB1	3.21e-22	0.204207	0.165	0.077	7.31e-18		ALCAM	3.51e-54	0.38336	0.29	0.088	7.98e-50
THAP2	3.01e-22	0.296872	0.126	0.036	6.84e-18		UBE2F	3.24e-73	0.464959	0.454	0.145	7.37e-69		UBE2F	2.66367e-44	0.301091	0.359	0.145	6.05798e-40		TPM1	2.38211e-36	0.48277	0.331	0.123	5.41763e-32		DNAJC15	2.41e-21	0.203979	0.53	0.38	5.49e-17		RALGDS	3.11e-35	0.382969	0.428	0.209	7.06e-31
SUSD6	6.43e-39	0.296188	0.297	0.116	1.46e-34		UNC93B1	9.42e-65	0.464367	0.362	0.1	2.14e-60		SH3BP5	3.72253e-32	0.301006	0.278	0.116	8.46616e-28		LRRK2	3.2534e-45	0.482174	0.198	0.028	7.39921e-41		PAK1	6.72e-28	0.203184	0.246	0.124	1.53e-23		BNIP3L	1.38e-36	0.382852	0.433	0.214	3.15e-32
SLC1A3	1.37e-26	0.295752	0.169	0.055	3.12e-22		SNX8	6.69e-63	0.464366	0.294	0.062	1.52e-58		SDC1	1.7626e-12	0.300635	0.134	0.065	4.00868e-08		SNX6	1.44895e-43	0.482011	0.646	0.341	3.29536e-39		CCND1	2.3e-19	0.203124	0.197	0.107	5.23e-15		RUNX1	6.04e-55	0.382696	0.453	0.184	1.37e-50
PRSS23	3.01e-17	0.295446	0.172	0.078	6.85e-13		CPM	1.36e-53	0.463866	0.248	0.049	3.09e-49		BST2	2.2817e-22	0.300292	0.646	0.455	5.18928e-18		ANXA4	8.12456e-62	0.481669	0.383	0.102	1.84777e-57		ARF3	3.34e-28	0.203052	0.36	0.211	7.6e-24		PDIA3	4.03e-25	0.382142	0.686	0.492	9.17e-21
RB1	1.9e-35	0.295411	0.374	0.179	4.33e-31		ADM	3.15e-41	0.462967	0.196	0.04	7.16e-37		EHBP1L1	2.83381e-32	0.300111	0.326	0.149	6.44493e-28		RUNX1	1.17184e-62	0.48152	0.453	0.139	2.66512e-58		CYBA	8.35e-10	0.202719	0.802	0.709	1.9e-05		ASPH	4.9e-47	0.378966	0.385	0.159	1.11e-42
TMSB10	7.85e-41	0.293865	0.98	0.933	1.79e-36		PIK3AP1	2.35e-52	0.462885	0.312	0.09	5.34e-48		THAP2	6.13593e-22	0.299963	0.127	0.036	1.39549e-17		IFIH1	1.5661e-54	0.480586	0.474	0.167	3.56179e-50		ADA2	4.43e-19	0.202181	0.258	0.155	1.01e-14		PTTG1IP	3.3e-49	0.378505	0.511	0.242	7.51e-45
PDXK	3.03e-33	0.293183	0.426	0.228	6.9e-29		ERRFI1	4.54e-45	0.462399	0.289	0.089	1.03e-40		HEXA	1.45324e-39	0.299315	0.361	0.156	3.3051e-35		SH2B3	7.3993e-55	0.479198	0.333	0.083	1.68282e-50		IRF8	3.32e-17	0.202157	0.249	0.152	7.54e-13		CKAP4	1.49e-34	0.377689	0.255	0.101	3.4e-30
SDHB	1.75e-38	0.292597	0.332	0.14	3.98e-34		TBXAS1	2.72e-58	0.461203	0.245	0.041	6.18e-54		OAZ1	7.20207e-27	0.299287	0.865	0.736	1.63797e-22		RNF149	7.06209e-40	0.479091	0.712	0.4	1.60613e-35		PPT1	7.27e-32	0.201622	0.356	0.199	1.65e-27		CSF2RB	9.68e-35	0.377099	0.222	0.076	2.2e-30
MT1X	1.98e-15	0.292511	0.476	0.338	4.5e-11		TPM3	2.39e-49	0.460221	0.784	0.502	5.45e-45		SUSD6	9.04927e-40	0.298883	0.304	0.116	2.05808e-35		ENO1	1.47149e-39	0.478975	0.734	0.441	3.3466e-35		EMILIN2	1.03e-27	0.200752	0.249	0.129	2.34e-23		P2RX4	7.15e-46	0.375494	0.32	0.116	1.63e-41
COL4A2	2.05e-15	0.292426	0.185	0.092	4.67e-11		CALU	3.95e-42	0.45952	0.371	0.156	8.98e-38		AC090617.10	2.83592e-25	0.298526	0.111	0.02	6.44973e-21		GNB2	3.89918e-56	0.478625	0.625	0.283	8.8679e-52		THY1	9e-09	0.200742	0.116	0.07	0.000204607		OLFML2B	8.69e-39	0.375358	0.222	0.07	1.98e-34
ASPH	5.91e-35	0.292425	0.284	0.116	1.34e-30		TUBA1B	8.76e-47	0.459459	0.683	0.409	1.99e-42		ZEB2	4.77131e-30	0.298441	0.469	0.266	1.08514e-25		POMP	3.22099e-49	0.478482	0.773	0.461	7.3255e-45		GLRX	6.33e-23	0.200273	0.42	0.279	1.44e-18		KCNMA1	1.5e-54	0.374719	0.264	0.07	3.41e-50
ARL5B	2.2e-33	0.292132	0.328	0.151	5e-29		POMP	2.13e-55	0.459116	0.748	0.461	4.84e-51		RGS2	2.32246e-16	0.298186	0.347	0.216	5.28198e-12		BCAT1	1.29801e-66	0.478177	0.308	0.053	2.95207e-62		CIITA	2.67e-20	0.199687	0.222	0.123	6.07e-16		JDP2	1.24e-59	0.374377	0.333	0.103	2.83e-55
LPAR6	5.77e-29	0.292013	0.213	0.078	1.31e-24		NAGK	4.1e-69	0.457716	0.452	0.151	9.32e-65		COL18A1	3.73123e-09	0.298035	0.175	0.107	8.48594e-05		NAGK	3.12047e-62	0.477775	0.466	0.151	7.09689e-58		RNF13	7.96e-32	0.199585	0.388	0.225	1.81e-27		ADAM9	2.16e-56	0.374331	0.336	0.11	4.91e-52
CD80	1.68e-25	0.291924	0.144	0.04	3.81e-21		PERP	1.25e-10	0.45755	0.232	0.149	2.84e-06		ADAM17	7.77288e-36	0.297775	0.266	0.098	1.76779e-31		EHBP1L1	2.37443e-53	0.477051	0.438	0.149	5.40017e-49		CASP1	2.72e-25	0.199513	0.362	0.222	6.18e-21		RAB5IF	1.56e-40	0.373814	0.579	0.335	3.55e-36
IFIH1	1.94e-32	0.290673	0.352	0.167	4.42e-28		SEMA6B	2.24e-35	0.450732	0.165	0.033	5.1e-31		PLSCR1	2.76431e-34	0.297221	0.589	0.363	6.28687e-30		TCIRG1	3.51625e-49	0.475506	0.591	0.266	7.997e-45		GBP4	4.99e-17	0.198725	0.37	0.25	1.14e-12		GAA	2.76e-43	0.373538	0.31	0.116	6.27e-39
PCBP1	1.08e-26	0.290562	0.634	0.43	2.45e-22		KRT6B	1.56e-15	0.45046	0.149	0.061	3.56e-11		COL4A1	1.0362e-14	0.296423	0.179	0.088	2.35663e-10		TPI1	7.72969e-40	0.475295	0.753	0.475	1.75796e-35		DUSP6	6.3e-23	0.198658	0.266	0.148	1.43e-18		SLC31A1	1.38e-64	0.373027	0.301	0.078	3.13e-60
ST14	3.9e-33	0.290197	0.175	0.046	8.87e-29		RGS2	4.77e-29	0.449953	0.413	0.216	1.09e-24		GNAQ	6.22121e-40	0.295877	0.281	0.101	1.41489e-35		ST14	1.62903e-62	0.474545	0.285	0.046	3.7049e-58		OTUD1	4.17e-17	0.198555	0.187	0.104	9.48e-13		IL18	1.93e-55	0.372723	0.222	0.048	4.39e-51
SEMA4A	2.58e-28	0.290119	0.156	0.044	5.87e-24		KYNU	3.66e-57	0.449581	0.258	0.049	8.33e-53		LPAR6	8.61618e-29	0.295384	0.215	0.078	1.95958e-24		CYBA	1.16496e-24	0.473979	0.856	0.659	2.64948e-20		ADAM9	1.53e-32	0.197259	0.239	0.11	3.47e-28		UNC93B1	9.93e-54	0.371491	0.388	0.146	2.26e-49
ATG3	5.61e-38	0.290088	0.351	0.155	1.28e-33		ITGA5	8.91e-55	0.44898	0.357	0.112	2.03e-50		ERRFI1	1.08181e-28	0.295248	0.229	0.089	2.46036e-24		MCOLN1	1.54732e-63	0.473689	0.296	0.051	3.51908e-59		KRT18	1.72e-13	0.197011	0.129	0.068	3.91e-09		SEMA6B	9.84e-27	0.370622	0.174	0.061	2.24e-22
NAPA	1.5e-34	0.28966	0.497	0.28	3.41e-30		MKNK1	2.92e-61	0.44876	0.337	0.09	6.64e-57		NPTN	2.32935e-40	0.294163	0.332	0.136	5.29763e-36		TBXAS1	1.27044e-55	0.473303	0.255	0.041	2.88937e-51		SPRED1	8.48e-33	0.196958	0.188	0.074	1.93e-28		TNFAIP6	1.57e-30	0.368231	0.247	0.096	3.57e-26
ENO1	4.36e-27	0.289286	0.642	0.441	9.92e-23		AP2M1	5.47e-52	0.44802	0.534	0.255	1.24e-47		CLIC1	6.91909e-31	0.293943	0.697	0.49	1.57361e-26		CALU	3.1564e-40	0.4731	0.392	0.156	7.17859e-36		CYTH4	3.04e-13	0.196626	0.184	0.11	6.92e-09		COMT	1.63e-44	0.36753	0.46	0.221	3.7e-40
MAP1B	7.48e-12	0.288963	0.116	0.053	1.7e-07		MCOLN1	1.18e-62	0.446518	0.274	0.051	2.69e-58		GPR84	2.40859e-27	0.293709	0.115	0.019	5.47786e-23		BHLHE40	6.06679e-47	0.47206	0.568	0.254	1.37977e-42		GNB2	1.11e-25	0.196391	0.506	0.345	2.52e-21		GBP4	9.22e-33	0.367255	0.474	0.25	2.1e-28
SH3BP5	1.04e-31	0.288918	0.274	0.116	2.37e-27		GBP4	4.35e-48	0.446295	0.449	0.189	9.89e-44		GSTP1	2.79212e-27	0.292906	0.614	0.417	6.35011e-23		KCNE1	1.78821e-39	0.472034	0.146	0.012	4.06693e-35		NADK	4.23e-24	0.196307	0.228	0.118	9.61e-20		SNX6	1.06e-34	0.367096	0.646	0.407	2.41e-30
UPP1	3.73e-30	0.288824	0.359	0.181	8.49e-26		LRRK2	3.19e-44	0.44525	0.183	0.028	7.25e-40		P2RX4	3.74702e-34	0.2926	0.217	0.069	8.52186e-30		ATG3	1.06629e-59	0.471822	0.467	0.155	2.42506e-55		PSMA7	2.32e-18	0.196296	0.694	0.554	5.28e-14		ANXA4	6.63e-49	0.366903	0.383	0.154	1.51e-44
MSRB2	8.57e-42	0.288666	0.235	0.069	1.95e-37		TPI1	7.48e-48	0.444893	0.749	0.475	1.7e-43		TRAPPC5	5.49527e-41	0.291732	0.43	0.205	1.24979e-36		YBX3	2.43684e-45	0.471292	0.593	0.281	5.54211e-41		RRBP1	8.25e-25	0.196177	0.41	0.265	1.88e-20		GNB1	5.92e-38	0.366002	0.627	0.371	1.35e-33
GAA	4.04e-32	0.288445	0.214	0.074	9.18e-28		NADK	1.91e-54	0.443249	0.294	0.076	4.34e-50		SDHB	2.87961e-39	0.290655	0.338	0.14	6.54911e-35		SPARCL1	6.30987e-06	0.471202	0.125	0.071	0.143505		SEMA6B	7.85e-13	0.195901	0.116	0.061	1.79e-08		2022-03-01	3.43e-41	0.365827	0.29	0.104	7.81e-37
AC090617.10	1.27e-24	0.288334	0.108	0.02	2.9e-20		ADAM17	1.2e-57	0.441924	0.34	0.098	2.74e-53		ZYX	1.10247e-33	0.290629	0.501	0.284	2.50734e-29		PRDX1	1.9393e-45	0.471034	0.749	0.484	4.41054e-41		PARP14	4.6e-17	0.195771	0.602	0.451	1.05e-12		GBP2	2.64e-37	0.364928	0.543	0.29	6e-33
CD151	4.97e-31	0.288324	0.307	0.143	1.13e-26		ACTB	3.34e-70	0.441321	0.983	0.931	7.59e-66		JDP2	2.02594e-39	0.290272	0.224	0.064	4.60759e-35		H1F0	9.99398e-58	0.470508	0.336	0.08	2.27293e-53		RAB32	3.57e-36	0.195645	0.248	0.111	8.12e-32		PLSCR1	6.9e-41	0.363972	0.722	0.442	1.57e-36
SLC40A1	1.31e-20	0.286922	0.107	0.027	2.98e-16		SLC31A1	3.44e-69	0.439118	0.278	0.044	7.83e-65		RB1	1.06621e-35	0.289422	0.379	0.179	2.42489e-31		ZEB2	1.42744e-47	0.47047	0.586	0.266	3.24644e-43		CLIC4	1.36e-27	0.19564	0.283	0.153	3.09e-23		PARP14	1.08e-32	0.361807	0.723	0.451	2.46e-28
COL18A1	1.94e-08	0.286416	0.17	0.107	0.000440881		MYO1G	3.37e-40	0.438972	0.358	0.144	7.66e-36		ALOX5	1.67848e-26	0.289413	0.159	0.047	3.81737e-22		UPP1	6.1279e-55	0.47038	0.496	0.181	1.39367e-50		EPB41L3	4.13e-25	0.195578	0.184	0.084	9.4e-21		RAB7A	1.6e-45	0.361669	0.613	0.333	3.64e-41
MYO1G	4.85e-23	0.285065	0.283	0.144	1.1e-18		MOB1A	1.95e-50	0.438949	0.622	0.324	4.43e-46		CD80	1.69259e-25	0.287567	0.145	0.04	3.84945e-21		OAZ1	1.18057e-41	0.470338	0.914	0.736	2.68496e-37		FGR	1.27e-18	0.195011	0.164	0.083	2.88e-14		VPS35	8e-47	0.3616	0.446	0.203	1.82e-42
HTRA1	3.83e-21	0.284707	0.21	0.096	8.71e-17		EMP3	5.11e-46	0.438507	0.718	0.436	1.16e-41		RRBP1	6.50265e-34	0.287184	0.41	0.21	1.4789e-29		GAS6	1.65749e-55	0.470226	0.343	0.091	3.76963e-51		APOL1	8.4e-28	0.194781	0.258	0.134	1.91e-23		TCIRG1	3.79e-39	0.361392	0.591	0.326	8.62e-35
KCNMA1	7.17e-31	0.284516	0.154	0.037	1.63e-26		GRASP	7.62e-37	0.43837	0.39	0.173	1.73e-32		PDXK	2.78965e-33	0.286744	0.43	0.228	6.3445e-29		UNC93B1	8.93275e-64	0.469856	0.388	0.1	2.03157e-59		DENND5A	6.13e-25	0.19476	0.25	0.134	1.39e-20		PRDX1	6.18e-36	0.360456	0.749	0.55	1.4e-31
GCA	1.71e-29	0.284485	0.263	0.112	3.88e-25		FCGR2B	9.49e-35	0.437502	0.187	0.045	2.16e-30		TUBA1C	6.42641e-37	0.286703	0.393	0.192	1.46156e-32		PARP14	6.2463e-44	0.469847	0.723	0.384	1.4206e-39		SERPINE2	2.38e-22	0.194007	0.117	0.043	5.41e-18		YBX3	3.5e-35	0.360358	0.593	0.342	7.96e-31
EVA1B	2.48e-36	0.284108	0.231	0.076	5.64e-32		NAPA	2.44e-57	0.437448	0.592	0.28	5.54e-53		PDIA4	2.23564e-32	0.286426	0.33	0.156	5.08451e-28		ZYX	6.68284e-52	0.469196	0.618	0.284	1.51988e-47		ADM	3.12e-21	0.193832	0.139	0.06	7.1e-17		PNRC1	1.61e-17	0.360262	0.888	0.758	3.67e-13
TUBA1B	4.82e-23	0.284097	0.587	0.409	1.1e-18		MDM2	4.32e-45	0.436721	0.326	0.113	9.82e-41		EPSTI1	7.37612e-32	0.286406	0.582	0.359	1.67755e-27		ERRFI1	1.14772e-41	0.464668	0.301	0.089	2.61027e-37		ZNF267	1.01e-22	0.193802	0.366	0.228	2.3e-18		PCBP1	3.6e-31	0.359801	0.724	0.488	8.19e-27
GNA13	1.25e-28	0.28388	0.396	0.214	2.83e-24		NEAT1	2.71e-47	0.436341	0.911	0.718	6.17e-43		GAA	1.01504e-32	0.286359	0.218	0.074	2.30851e-28		RIPK2	3.2839e-52	0.464429	0.424	0.142	7.46857e-48		THAP2	8.16e-13	0.192893	0.127	0.068	1.86e-08		EHBP1L1	1.29e-42	0.359786	0.438	0.201	2.94e-38
SNX8	3.4e-35	0.283067	0.206	0.062	7.74e-31		CSTB	3.08e-44	0.436137	0.712	0.433	7.01e-40		BNIP3L	2.83266e-28	0.284981	0.322	0.156	6.44232e-24		SLC31A1	5.07564e-70	0.462212	0.301	0.044	1.15435e-65		CD274	2.49e-20	0.192696	0.138	0.061	5.66e-16		SERPINE2	1.16e-37	0.359178	0.172	0.043	2.64e-33
PPP1R18	2.71e-30	0.282855	0.366	0.188	6.17e-26		JDP2	2.58e-61	0.435944	0.293	0.064	5.88e-57		IGFLR1	2.71016e-26	0.284744	0.266	0.12	6.16372e-22		ASPH	2.00723e-54	0.460432	0.385	0.116	4.56503e-50		RHOA	6.85e-21	0.192613	0.709	0.556	1.56e-16		RASGEF1B	4.59e-41	0.35891	0.456	0.216	1.04e-36
AP2M1	6.47e-32	0.282403	0.454	0.255	1.47e-27		GNB2	1.1e-56	0.434909	0.587	0.283	2.49e-52		SEMA6B	1.72695e-20	0.284397	0.116	0.033	3.92761e-16		SEMA6B	1.59972e-34	0.459118	0.174	0.033	3.63825e-30		UBE2F	1.22e-31	0.191785	0.359	0.201	2.77e-27		TOM1	9.43e-43	0.358819	0.345	0.138	2.15e-38
COL4A1	3.79e-13	0.281547	0.171	0.088	8.63e-09		CDCP1	2.22e-55	0.434672	0.248	0.047	5.04e-51		ARL5B	1.22576e-32	0.284305	0.33	0.151	2.78775e-28		TNC	1.62607e-34	0.458811	0.195	0.043	3.69817e-30		TCIRG1	4.37e-22	0.191633	0.478	0.326	9.94e-18		CYBA	2.02e-18	0.358084	0.856	0.709	4.61e-14
HEXA	6.3e-38	0.281318	0.353	0.156	1.43e-33		NCOA4	1.07e-58	0.434232	0.43	0.157	2.44e-54		DST	4.22724e-23	0.284281	0.216	0.094	9.61401e-19		CLIC1	5.96546e-44	0.458702	0.785	0.49	1.35672e-39		SUSD6	6.16e-27	0.191254	0.304	0.17	1.4e-22		TNS3	2.7e-42	0.357774	0.269	0.092	6.14e-38
TRAPPC5	1.29e-38	0.281264	0.417	0.205	2.94e-34		PTEN	1.35e-65	0.434059	0.482	0.178	3.08e-61		LEPROT	3.64167e-40	0.283977	0.392	0.176	8.28225e-36		ALCAM	1.61472e-60	0.456617	0.29	0.053	3.67236e-56		CCDC88A	4.93e-30	0.191158	0.262	0.134	1.12e-25		RHOA	4.76e-34	0.357308	0.802	0.556	1.08e-29
RAB1A	2.5e-36	0.280431	0.423	0.215	5.68e-32		NFE2L2	1.42e-50	0.433643	0.65	0.344	3.22e-46		ATG3	4.06314e-39	0.283882	0.359	0.155	9.2408e-35		GCA	2.28087e-53	0.45593	0.38	0.112	5.18739e-49		LPAR6	1.18e-17	0.190861	0.215	0.123	2.68e-13		CAVIN1	8.37e-29	0.357232	0.277	0.124	1.9e-24
SNX6	1.24e-28	0.28029	0.545	0.341	2.81e-24		MT-ND4	8.76e-42	0.433189	0.989	0.937	1.99e-37		ST14	1.68182e-34	0.283434	0.181	0.046	3.82497e-30		COMT	6.81366e-55	0.453544	0.46	0.165	1.54963e-50		KDELR2	3.38e-17	0.190677	0.425	0.31	7.69e-13		SH2B3	3.85e-43	0.356279	0.333	0.129	8.76e-39
CIAO2A	2.73e-35	0.279817	0.397	0.198	6.2e-31		SRC	3.84e-60	0.43283	0.218	0.024	8.73e-56		PERP	6.61727e-07	0.283317	0.209	0.149	0.0150497		AC007952.4	7.21364e-31	0.452582	0.205	0.057	1.6406e-26		ANXA4	2.19e-26	0.190522	0.279	0.154	4.98e-22		GNG5	5.76e-39	0.356216	0.829	0.585	1.31e-34
RRBP1	7.94e-33	0.27973	0.402	0.21	1.81e-28		PABPC4	6.39e-47	0.432779	0.44	0.186	1.45e-42		EVA1B	6.6227e-38	0.283288	0.239	0.076	1.5062e-33		TLR4	7.78621e-50	0.452448	0.216	0.031	1.77082e-45		TMBIM1	3.16e-28	0.190036	0.297	0.162	7.19e-24		MCOLN1	7.44e-52	0.355921	0.296	0.093	1.69e-47
MOB1A	2.77e-30	0.279426	0.534	0.324	6.3e-26		PSME2	1.37e-42	0.431996	0.778	0.529	3.1e-38		THY1	1.34595e-11	0.282278	0.116	0.053	3.0611e-07		COL5A1	3.91981e-29	0.452391	0.218	0.065	8.91483e-25		FSTL1	1.66e-19	0.189587	0.199	0.106	3.77e-15		RIPK2	7.8e-44	0.355663	0.424	0.187	1.78e-39
SDC3	4.65e-33	0.279269	0.146	0.028	1.06e-28		TLR4	2.8e-47	0.430177	0.196	0.031	6.37e-43		TOM1	1.60554e-36	0.282174	0.264	0.096	3.65148e-32		PRELID1	4.60368e-49	0.451469	0.631	0.321	1.04701e-44		FGD4	1.88e-30	0.188558	0.186	0.077	4.28e-26		TBXAS1	1.31e-41	0.355317	0.255	0.084	2.98e-37
SKAP2	8.55e-29	0.278927	0.219	0.083	1.94e-24		TFRC	1.82e-38	0.428867	0.381	0.162	4.13e-34		SEMA4A	4.61861e-28	0.281933	0.157	0.044	1.05041e-23		SKAP2	2.12961e-53	0.450871	0.329	0.083	4.84337e-49		SLAMF7	1.51e-12	0.188394	0.175	0.106	3.44e-08		KCNE1	1.05e-30	0.35516	0.146	0.038	2.39e-26
CLIC1	9.67e-30	0.278725	0.691	0.49	2.2e-25		GLA	5.86e-44	0.428599	0.323	0.112	1.33e-39		SKAP2	9.82264e-30	0.281785	0.224	0.083	2.23396e-25		MYO1G	7.61612e-37	0.45078	0.373	0.144	1.73213e-32		HLA-B	4.5e-22	0.188371	0.966	0.948	1.02e-17		TFRC	3.87e-28	0.355116	0.397	0.204	8.8e-24
NPTN	4.44e-38	0.278539	0.322	0.136	1.01e-33		PAK1	6.31e-64	0.427996	0.333	0.083	1.44e-59		HSP90B1	6.3916e-23	0.281537	0.641	0.468	1.45364e-18		UBE2F	3.81985e-64	0.447989	0.464	0.145	8.68749e-60		PHLDA2	3.58e-34	0.187877	0.32	0.169	8.13e-30		RRBP1	1.18e-42	0.354906	0.518	0.265	2.69e-38
CD4	3.17e-23	0.278496	0.231	0.105	7.21e-19		MANBA	3.15e-53	0.427793	0.358	0.115	7.17e-49		UPP1	7.02187e-31	0.281507	0.365	0.181	1.59698e-26		NOP10	3.90424e-48	0.447538	0.66	0.336	8.87942e-44		TNFRSF12A	1.9e-18	0.187648	0.216	0.123	4.33e-14		CORO1C	3.34e-53	0.354856	0.387	0.147	7.6e-49
RIPK2	1.39e-30	0.277768	0.309	0.142	3.16e-26		DST	5.24e-30	0.427623	0.245	0.094	1.19e-25		GRASP	1.8777e-18	0.281168	0.307	0.173	4.27046e-14		HPSE	7.20285e-49	0.447294	0.225	0.035	1.63814e-44		CEP170	1.13e-26	0.187411	0.246	0.126	2.56e-22		ZEB2	3.73e-37	0.353536	0.586	0.329	8.47e-33
ACP2	4.69e-39	0.277286	0.188	0.044	1.07e-34		2022-03-01	1.24e-48	0.42749	0.269	0.068	2.82e-44		MSRB2	3.39461e-43	0.281057	0.242	0.069	7.72036e-39		SLC43A3	5.81352e-63	0.447057	0.334	0.071	1.32217e-58		CFD	7.75e-22	0.18652	0.161	0.073	1.76e-17		NAGK	6.14e-47	0.350906	0.466	0.211	1.4e-42
TBXAS1	9.24e-32	0.277118	0.163	0.041	2.1e-27		RILPL2	1.24e-42	0.427425	0.496	0.241	2.81e-38		SNX8	1.33906e-34	0.280916	0.207	0.062	3.04542e-30		SERINC2	4.22537e-43	0.446236	0.256	0.063	9.60977e-39		LRRK2	9.81e-16	0.186507	0.115	0.053	2.23e-11		SKAP2	1.68e-45	0.350538	0.329	0.122	3.83e-41
SEMA6B	1.58e-20	0.276382	0.115	0.033	3.6e-16		SNX6	4.23e-47	0.426893	0.626	0.341	9.61e-43		MOB1A	4.72361e-31	0.280676	0.542	0.324	1.07429e-26		RRBP1	1.39863e-51	0.445913	0.518	0.21	3.18091e-47		ATP2A2	1.75e-24	0.186184	0.403	0.261	3.99e-20		AGAP3	7.58e-58	0.350249	0.327	0.103	1.72e-53
GLA	7.92e-27	0.274747	0.255	0.112	1.8e-22		CLIC1	3.27e-49	0.425546	0.762	0.49	7.44e-45		CCDC88A	5.76868e-41	0.280501	0.262	0.087	1.31197e-36		NFE2L2	6.2368e-45	0.445223	0.677	0.344	1.41844e-40		CCT6A	4.36e-19	0.186165	0.382	0.261	9.91e-15		ADM	2.84e-43	0.3502	0.218	0.06	6.45e-39
CASP4	2.55e-32	0.273849	0.329	0.152	5.81e-28		IGFLR1	5.29e-46	0.424683	0.342	0.12	1.2e-41		SLC40A1	2.11829e-20	0.280501	0.108	0.027	4.81762e-16		2022-03-01	6.51507e-49	0.445124	0.29	0.068	1.48172e-44		LIMA1	1.92e-15	0.185871	0.245	0.155	4.37e-11		NRG1	2.86e-57	0.350153	0.198	0.033	6.51e-53
KRT6B	1.94e-08	0.273678	0.114	0.061	0.000441961		SLC43A3	1.11e-63	0.423941	0.312	0.071	2.53e-59		SDC3	2.39927e-35	0.280488	0.154	0.028	5.45665e-31		PAK1	2.43557e-61	0.444829	0.352	0.083	5.53922e-57		CDCP1	1.7e-28	0.185624	0.176	0.073	3.87e-24		ST14	1.79e-54	0.349708	0.285	0.081	4.08e-50
CCDC88A	2.19e-39	0.273443	0.255	0.087	4.99e-35		PCBP1	5.06e-43	0.423838	0.707	0.43	1.15e-38		MT1X	9.53703e-17	0.279886	0.485	0.338	2.16901e-12		ADAM9	3.51881e-64	0.444735	0.336	0.071	8.00282e-60		YWHAE	2.36e-22	0.185307	0.511	0.358	5.37e-18		GNA15	9.6e-49	0.349223	0.342	0.124	2.18e-44
GPR137B	2.34e-27	0.272738	0.207	0.078	5.33e-23		RHOG	1.36e-50	0.423074	0.567	0.268	3.1e-46		GNB2	3.1117e-35	0.279259	0.506	0.283	7.07695e-31		M6PR	1.25014e-50	0.444233	0.496	0.198	2.8432e-46		GBP2	2.04e-22	0.185269	0.44	0.29	4.63e-18		SDCCAG8	9.88e-54	0.349186	0.356	0.127	2.25e-49
FUCA2	1e-41	0.27258	0.29	0.107	2.28e-37		SDHB	5.5e-60	0.422485	0.413	0.14	1.25e-55		PNRC1	1.76114e-13	0.278277	0.843	0.714	4.00537e-09		STAT2	1.32305e-54	0.44419	0.603	0.256	3.00901e-50		PIK3AP1	1.76e-18	0.185137	0.221	0.126	4e-14		NOP10	5.62e-39	0.348945	0.66	0.406	1.28e-34
CD81	1.05e-17	0.27244	0.672	0.527	2.39e-13		ADAM9	4.58e-66	0.421839	0.317	0.071	1.04e-61		HLA-B	5.70338e-31	0.277404	0.966	0.934	1.29712e-26		EPSTI1	3.36166e-47	0.443848	0.691	0.359	7.64541e-43		RCN1	2.05e-23	0.184965	0.25	0.137	4.67e-19		ATG3	1.01e-47	0.348176	0.467	0.211	2.3e-43
CREB5	1.53e-29	0.272358	0.171	0.051	3.49e-25		TOM1	5.12e-59	0.421308	0.34	0.096	1.16e-54		RAB32	1.65558e-41	0.277177	0.248	0.076	3.76529e-37		CD151	8.58482e-44	0.443372	0.389	0.143	1.95244e-39		ITGA5	1.54e-22	0.184747	0.279	0.161	3.5e-18		CANX	6.47e-32	0.348044	0.609	0.38	1.47e-27
THY1	3.25e-11	0.271821	0.113	0.053	7.4e-07		FUCA2	2.55e-64	0.420951	0.367	0.107	5.79e-60		RAB1A	2.5012e-37	0.27709	0.431	0.215	5.68848e-33		GPX4	3.09451e-50	0.442784	0.707	0.376	7.03784e-46		OGFRL1	6.32e-27	0.184568	0.24	0.121	1.44e-22		LPCAT4	5.14e-22	0.347207	0.216	0.099	1.17e-17
HLA-B	2e-30	0.270714	0.967	0.934	4.54e-26		GJB2	4.46e-34	0.420865	0.163	0.033	1.01e-29		SNX6	1.35627e-28	0.276378	0.549	0.341	3.08456e-24		EMP3	1.66145e-40	0.442246	0.737	0.436	3.77864e-36		SYK	1.41e-21	0.184543	0.225	0.122	3.2e-17		PHLDA2	2.57e-57	0.346809	0.431	0.169	5.83e-53
LDLR	4.38e-30	0.270361	0.252	0.103	9.97e-26		TNS4	1.46e-26	0.420477	0.144	0.035	3.31e-22		RIPK2	7.03916e-32	0.27634	0.317	0.142	1.60092e-27		RAB1A	5.00147e-54	0.442075	0.538	0.215	1.13748e-49		COL7A1	9.17e-22	0.183877	0.147	0.064	2.09e-17		SLC43A3	3.28e-53	0.346534	0.334	0.114	7.45e-49
KYNU	3.24e-30	0.270106	0.172	0.049	7.36e-26		SUSD6	4.55e-60	0.420422	0.375	0.116	1.04e-55		CD4	1.52387e-23	0.276154	0.234	0.105	3.46573e-19		COL6A2	2.57616e-21	0.44126	0.236	0.095	5.85896e-17		MBD2	1.86e-23	0.183818	0.425	0.276	4.23e-19		APOL1	3.04e-47	0.345737	0.349	0.134	6.91e-43
GNB2	3.82e-34	0.269808	0.498	0.283	8.68e-30		RAB5IF	1.56e-49	0.420225	0.567	0.287	3.54e-45		MYO1G	3.16455e-22	0.275803	0.283	0.144	7.19714e-18		TFRC	3.50642e-35	0.441255	0.397	0.162	7.97464e-31		MEFV	7.79e-18	0.183805	0.12	0.053	1.77e-13		GPR84	3.46e-42	0.345707	0.198	0.05	7.86e-38
TUBA1C	1.13e-35	0.269259	0.387	0.192	2.58e-31		M6PR	3.65e-53	0.420062	0.47	0.198	8.29e-49		GJB2	3.8047e-21	0.275494	0.119	0.033	8.65304e-17		ITGB4	4.3096e-26	0.441108	0.16	0.04	9.80133e-22		COMT	7.54e-30	0.183638	0.371	0.221	1.71e-25		ATP2A2	3.06e-38	0.345348	0.492	0.261	6.97e-34
SLC16A3	7.89e-28	0.268506	0.329	0.164	1.79e-23		SLC7A8	1.77e-53	0.419637	0.186	0.017	4.02e-49		ACP2	4.88919e-41	0.275109	0.196	0.044	1.11195e-36		ZMIZ1	3.48305e-49	0.438838	0.327	0.091	7.9215e-45		SH2B3	2.93e-23	0.183028	0.24	0.129	6.67e-19		UPP1	4.38e-46	0.344972	0.496	0.233	9.97e-42
RAB32	3.38e-38	0.26752	0.236	0.076	7.68e-34		DAPK1	9.76e-57	0.419421	0.241	0.04	2.22e-52		NAPA	6.40214e-34	0.272908	0.501	0.28	1.45604e-29		MDM2	1.1028e-42	0.437837	0.344	0.113	2.50809e-38		EHBP1L1	1.15e-21	0.182847	0.326	0.201	2.61e-17		EIF4G1	1.58e-22	0.344729	0.415	0.255	3.6e-18
SDC2	1.01e-26	0.266791	0.131	0.031	2.3e-22		SKAP2	1.42e-51	0.419259	0.3	0.083	3.23e-47		COL12A1	3.36387e-16	0.272735	0.135	0.054	7.65045e-12		PDIA3	1.49079e-30	0.437521	0.686	0.439	3.3905e-26		GNB1	3.73e-21	0.182814	0.519	0.371	8.48e-17		COL5A1	8.14e-28	0.344465	0.218	0.083	1.85e-23
SPON2	7.74e-08	0.266557	0.187	0.121	0.00176066		RAB1A	1.71e-57	0.418388	0.509	0.215	3.89e-53		RHOA	1.08813e-28	0.272376	0.709	0.493	2.47473e-24		KYNU	2.4166e-59	0.437309	0.284	0.049	5.49608e-55		CHMP1B	8.87e-21	0.182661	0.434	0.293	2.02e-16		PTPN12	2.15e-56	0.344343	0.44	0.173	4.88e-52
NAGK	2.44e-39	0.266138	0.349	0.151	5.55e-35		SYNGR2	1e-46	0.417296	0.527	0.255	2.28e-42		IFIH1	1.17246e-30	0.271979	0.35	0.167	2.66652e-26		RHOA	3.54023e-41	0.437071	0.802	0.493	8.05155e-37		CORO1C	3.31e-32	0.18237	0.288	0.147	7.53e-28		TLR4	5.86e-42	0.344047	0.216	0.061	1.33e-37
ZYX	2.91e-31	0.265979	0.49	0.284	6.62e-27		CREB5	3.16e-51	0.417106	0.242	0.051	7.18e-47		ADM	4.12691e-24	0.271574	0.139	0.04	9.38583e-20		ACTB	2.26485e-55	0.43705	0.984	0.931	5.15095e-51		SLC31A1	4.58e-35	0.182219	0.2	0.078	1.04e-30		TMEM14C	8.9e-35	0.343988	0.46	0.252	2.02e-30
CDC42EP2	3.91e-28	0.265825	0.146	0.038	8.89e-24		ZYX	8.89e-53	0.41657	0.583	0.284	2.02e-48		SLC31A1	3.71713e-42	0.271404	0.2	0.044	8.45387e-38		FUCA2	4.07491e-64	0.436689	0.397	0.107	9.26757e-60		PLEKHB2	7.05e-24	0.182133	0.453	0.295	1.6e-19		NPTN	8.84e-45	0.343906	0.412	0.184	2.01e-40
SLC31A1	2.89e-39	0.265731	0.19	0.044	6.57e-35		PPP1R18	2.99e-50	0.416189	0.45	0.188	6.79e-46		CAVIN1	3.42656e-21	0.271268	0.224	0.105	7.79303e-17		RRAD	1.60181e-28	0.43587	0.187	0.049	3.643e-24		SLIRP	1.31e-21	0.181881	0.481	0.339	2.98e-17		STAT2	1.63e-40	0.343605	0.603	0.327	3.7e-36
RAB5C	1.05e-33	0.26525	0.401	0.204	2.39e-29		RHOA	8.94e-48	0.416166	0.78	0.493	2.03e-43		TBXAS1	2.47151e-31	0.271078	0.164	0.041	5.62095e-27		PCBP1	4.89463e-37	0.435459	0.724	0.43	1.11319e-32		KIFC3	3.95e-32	0.181669	0.23	0.104	8.99e-28		EMP3	1.03e-31	0.342989	0.737	0.5	2.34e-27
TNFRSF21	4.9e-32	0.26508	0.189	0.056	1.11e-27		CD151	4.13e-46	0.416	0.37	0.143	9.4e-42		GLA	1.04486e-26	0.271072	0.257	0.112	2.37632e-22		SRC	1.5416e-59	0.433515	0.23	0.024	3.50606e-55		ZEB2	1.35e-19	0.181508	0.469	0.329	3.06e-15		CD274	2.78e-37	0.342243	0.204	0.061	6.32e-33
GGT5	4.38e-22	0.26476	0.172	0.067	9.95e-18		COL6A3	5.56e-15	0.415353	0.167	0.078	1.26e-10		SPON2	4.55465e-09	0.270385	0.195	0.121	0.000103586		SDHB	1.92629e-55	0.431234	0.432	0.14	4.38095e-51		SKAP2	3.27e-21	0.181453	0.224	0.122	7.45e-17		KIFC3	6.65e-55	0.341168	0.324	0.104	1.51e-50
MCOLN1	5.09e-36	0.264313	0.191	0.051	1.16e-31		ASPH	7.72e-52	0.415208	0.35	0.116	1.76e-47		PLEKHB2	2.62271e-34	0.269914	0.453	0.236	5.96484e-30		GNA15	6.04213e-56	0.430962	0.342	0.087	1.37416e-51		CSF3R	8.15e-19	0.181131	0.114	0.047	1.85e-14		OAZ1	1.25e-31	0.341125	0.914	0.783	2.85e-27
PLEKHB2	2.19e-33	0.263915	0.444	0.236	4.97e-29		ENO1	2.05e-41	0.415021	0.713	0.441	4.66e-37		FUCA2	2.42751e-43	0.269877	0.298	0.107	5.52088e-39		CAV2	2.3387e-28	0.430531	0.246	0.087	5.31891e-24		IFIT1	1.44e-12	0.181101	0.331	0.234	3.27e-08		TAP1	7.12e-24	0.340884	0.662	0.463	1.62e-19
SPG21	1.82e-32	0.263127	0.358	0.174	4.14e-28		PTHLH	1.44e-18	0.414512	0.137	0.048	3.28e-14		COMT	2.71042e-40	0.269651	0.371	0.165	6.16431e-36		CASP4	8.0785e-51	0.430068	0.437	0.152	1.83729e-46		M6PR	3.15e-23	0.181003	0.378	0.24	7.16e-19		ERRFI1	6.38e-32	0.340555	0.301	0.13	1.45e-27
COMT	8.33e-39	0.262982	0.363	0.165	1.89e-34		RNF149	2.63e-43	0.413633	0.69	0.4	5.99e-39		GCA	3.64992e-29	0.269624	0.266	0.112	8.301e-25		TRAF1	1.14769e-31	0.429186	0.303	0.113	2.61018e-27		AMPD2	8.67e-24	0.180145	0.187	0.089	1.97e-19		ABHD12	1.36e-50	0.340524	0.407	0.163	3.1e-46
RHOA	6.12e-28	0.262766	0.702	0.493	1.39e-23		IL18BP	1.87e-46	0.413397	0.262	0.07	4.25e-42		RAB5C	3.09336e-34	0.269055	0.407	0.204	7.03522e-30		MAP2K3	4.24997e-39	0.428485	0.396	0.154	9.6657e-35		DEK	4.2e-23	0.179807	0.537	0.376	9.56e-19		ACTB	6.3e-45	0.34026	0.984	0.947	1.43e-40
NOP10	3.32e-32	0.261904	0.555	0.336	7.54e-28		RUNX1	3.76e-57	0.412974	0.404	0.139	8.54e-53		CDC42EP2	2.04454e-29	0.268613	0.151	0.038	4.64991e-25		ADM	4.72389e-44	0.427941	0.218	0.04	1.07435e-39		PSME2	5.13e-18	0.179625	0.723	0.593	1.17e-13		UBE2F	2.95e-51	0.338683	0.464	0.201	6.71e-47
LEPROT	3.32e-38	0.261812	0.382	0.176	7.54e-34		MAP2K3	1.35e-42	0.412711	0.38	0.154	3.06e-38		CKAP4	2.33843e-26	0.268467	0.206	0.082	5.31828e-22		NAPA	2.52712e-48	0.427652	0.603	0.28	5.74743e-44		SERPINF1	4.42e-10	0.179301	0.146	0.089	1.01e-05		PTPN6	2.79e-29	0.338584	0.397	0.205	6.34e-25
PTEN	1.45e-39	0.261739	0.386	0.178	3.29e-35		CASP4	8.59e-52	0.410983	0.407	0.152	1.95e-47		SDC2	1.15012e-27	0.26805	0.135	0.031	2.61571e-23		PTEN	1.48785e-55	0.427315	0.488	0.178	3.38383e-51		PLIN3	3.73e-24	0.179232	0.275	0.154	8.48e-20		TAGLN	2.59e-44	0.338094	0.29	0.101	5.89e-40
ADM	2.91e-22	0.26128	0.132	0.04	6.63e-18		MIR155HG	2.85e-23	0.409498	0.264	0.124	6.49e-19		ADAM9	6.0406e-41	0.267663	0.239	0.071	1.37381e-36		ITGA5	1.80517e-48	0.424589	0.366	0.112	4.10551e-44		RPS27L	3.58e-20	0.178045	0.612	0.459	8.15e-16		HSP90B1	6.73e-25	0.337607	0.71	0.522	1.53e-20
TOM1	9.2e-35	0.26075	0.256	0.096	2.09e-30		NOP10	2.26e-53	0.409462	0.644	0.336	5.15e-49		KYNU	1.32722e-31	0.267227	0.178	0.049	3.01849e-27		ADAM17	7.78387e-51	0.421905	0.346	0.098	1.77029e-46		NRG1	7.27e-30	0.178011	0.119	0.033	1.65e-25		PTEN	1.3e-43	0.337569	0.488	0.237	2.96e-39
IL18BP	2.5e-28	0.260465	0.197	0.07	5.68e-24		GPR137B	2.81e-46	0.409336	0.276	0.078	6.4e-42		CASP4	9.59562e-33	0.267145	0.334	0.152	2.18233e-28		CREB5	1.3039e-49	0.421003	0.255	0.051	2.96545e-45		CSF2RB	1.14e-16	0.177851	0.149	0.076	2.6e-12		LACTB	4.84e-42	0.337187	0.373	0.158	1.1e-37
CSF3R	2.38e-24	0.260073	0.111	0.022	5.4e-20		PLEKHB2	6.84e-55	0.409007	0.536	0.236	1.56e-50		PPP1R18	2.36677e-29	0.267074	0.367	0.188	5.38276e-25		COL6A3	1.07559e-15	0.419813	0.182	0.078	2.44622e-11		GPR183	2.81e-07	0.177627	0.5	0.43	0.00639349		NFE2L2	1.64e-33	0.336939	0.677	0.414	3.73e-29
NCOA4	2.81e-33	0.259936	0.335	0.157	6.39e-29		BCAT1	4.57e-59	0.408967	0.268	0.053	1.04e-54		TAP1	3.39601e-22	0.266693	0.598	0.409	7.72356e-18		PABPC4	3.21425e-44	0.418763	0.464	0.186	7.31016e-40		CAMK1	1.43e-19	0.177148	0.135	0.061	3.25e-15		PIM3	2.71e-33	0.335241	0.604	0.346	6.16e-29
SRC	3.52e-33	0.258354	0.139	0.024	8.01e-29		PHACTR1	2.74e-31	0.408961	0.21	0.067	6.24e-27		HSPB1	7.6881e-34	0.266595	0.474	0.266	1.7485e-29		CSTB	2.63629e-39	0.418371	0.737	0.433	5.99572e-35		SPON2	9.06e-10	0.177027	0.195	0.129	2.06e-05		ZMIZ1	1.1e-37	0.334537	0.327	0.137	2.51e-33
HSP90B1	5.64e-22	0.258241	0.638	0.468	1.28e-17		ZMIZ1	2.26e-48	0.408911	0.301	0.091	5.14e-44		CSF3R	2.50872e-25	0.266501	0.114	0.022	5.70558e-21		TNS3	5.31819e-48	0.418337	0.269	0.06	1.20952e-43		SMIM25	1.25e-20	0.176809	0.158	0.074	2.85e-16		CEP170	1.86e-48	0.334256	0.344	0.126	4.24e-44
PRNP	1.28e-21	0.258085	0.356	0.207	2.9e-17		AC105460.1	9.38e-26	0.407805	0.128	0.027	2.13e-21		PTEN	7.18493e-41	0.266382	0.394	0.178	1.63407e-36		DAPK1	4.85082e-59	0.41824	0.264	0.04	1.10322e-54		MOB1A	1.25e-21	0.176796	0.542	0.383	2.84e-17		KDELR1	2.12e-28	0.333612	0.479	0.285	4.82e-24
TLR4	1.76e-25	0.257573	0.128	0.031	4.01e-21		DNAJC15	1.16e-41	0.407329	0.589	0.32	2.64e-37		CDCP1	3.29013e-32	0.265824	0.176	0.047	7.48274e-28		CSF3R	2.20879e-43	0.417666	0.18	0.022	5.02344e-39		PTEN	3.63e-29	0.176636	0.394	0.237	8.26e-25		CSF3R	1.14e-37	0.332296	0.18	0.047	2.59e-33
CDCP1	1.27e-29	0.257424	0.166	0.047	2.89e-25		STAT2	3.89e-59	0.406944	0.577	0.256	8.85e-55		LRRK2	2.6751e-22	0.265701	0.115	0.028	6.08399e-18		NPTN	6.35708e-53	0.41707	0.412	0.136	1.44579e-48		SDC3	3.18e-29	0.176605	0.154	0.056	7.23e-25		RAB32	2.27e-58	0.332066	0.342	0.111	5.16e-54
LRRK2	1.07e-21	0.256914	0.112	0.028	2.43e-17		TMSB10	2.34e-70	0.406556	0.989	0.933	5.32e-66		TNFRSF21	3.15702e-33	0.265433	0.195	0.056	7.18001e-29		AGAP3	1.11835e-59	0.416853	0.327	0.074	2.54347e-55		NFIC	2.93e-23	0.176493	0.254	0.141	6.66e-19		POMP	1.73e-36	0.331549	0.773	0.532	3.93e-32
RALGDS	2.04e-25	0.256736	0.317	0.16	4.65e-21		GNA15	4.13e-56	0.405987	0.318	0.087	9.39e-52		CD81	7.9573e-17	0.265066	0.673	0.527	1.80973e-12		GRASP	8.92652e-32	0.416659	0.4	0.173	2.03016e-27		GNAQ	5.67e-28	0.176203	0.281	0.149	1.29e-23		IFIH1	1.41e-37	0.331342	0.474	0.237	3.2e-33
PSTPIP2	3.76e-31	0.25669	0.166	0.044	8.55e-27		GSTP1	2.31e-42	0.405119	0.686	0.417	5.26e-38		GNA13	7.40962e-27	0.264904	0.394	0.214	1.68517e-22		RAB5C	4.27618e-49	0.416333	0.504	0.204	9.72531e-45		RAB5C	2.58e-23	0.176167	0.407	0.264	5.87e-19		LY6K	3.04e-40	0.331219	0.139	0.024	6.91e-36
RNASEK	1.2e-21	0.256464	0.762	0.6	2.72e-17		CD274	5.02e-44	0.402405	0.197	0.036	1.14e-39		KCNMA1	5.82497e-32	0.264263	0.159	0.037	1.32477e-27		GNA13	3.26725e-41	0.416031	0.492	0.214	7.43071e-37		SLC3A2	9.64e-17	0.176033	0.48	0.353	2.19e-12		LEPROT	2.08e-42	0.331208	0.482	0.232	4.73e-38
PACSIN2	2.88e-33	0.256049	0.22	0.075	6.55e-29		RRAD	1.58e-26	0.402211	0.168	0.049	3.6e-22		BCAT1	3.60933e-36	0.262643	0.196	0.053	8.2087e-32		NADK	1.68959e-52	0.414794	0.312	0.076	3.84263e-48		QSOX1	3.1e-28	0.175704	0.28	0.149	7.05e-24		PRELID1	5.85e-36	0.331152	0.631	0.395	1.33e-31
H3F3A	6.95e-17	0.255192	0.868	0.744	1.58e-12		RNASEK	6.93e-37	0.402086	0.824	0.6	1.58e-32		APOL1	4.14475e-35	0.262368	0.258	0.094	9.42642e-31		HLA-B	5.30545e-45	0.414461	0.982	0.934	1.20662e-40		ATF5	4.26e-26	0.175182	0.289	0.161	9.69e-22		KYNU	3.92e-53	0.328657	0.284	0.082	8.92e-49
ADAM9	1.45e-38	0.255044	0.23	0.071	3.3e-34		COMT	6.74e-59	0.401666	0.44	0.165	1.53e-54		NOP10	2.01593e-32	0.262307	0.56	0.336	4.58482e-28		IGFLR1	3.04127e-43	0.414291	0.359	0.12	6.91677e-39		PPP1R15A	6.93e-15	0.174933	0.691	0.565	1.58e-10		MDM2	2.04e-32	0.328556	0.344	0.159	4.64e-28
ALDH2	2.52e-31	0.254824	0.176	0.05	5.74e-27		KIFC3	6.81e-62	0.400691	0.305	0.069	1.55e-57		IL18BP	6.04618e-29	0.261744	0.201	0.07	1.37508e-24		ATP2A2	3.65338e-45	0.414256	0.492	0.207	8.30888e-41		SDHB	4.9e-27	0.174797	0.338	0.198	1.11e-22		RAB1A	8.56e-43	0.328278	0.538	0.275	1.95e-38
QSOX1	1.67e-36	0.254439	0.272	0.102	3.8e-32		TAGLN	2.82e-40	0.40064	0.258	0.079	6.4e-36		SLC7A8	7.03687e-31	0.261618	0.12	0.017	1.6004e-26		FCGR2B	1.37615e-31	0.413801	0.19	0.045	3.12977e-27		THBS2	1.12e-19	0.17476	0.121	0.049	2.55e-15		PABPC4	7.31e-37	0.328119	0.464	0.235	1.66e-32
PEA15	1.43e-29	0.254364	0.284	0.127	3.25e-25		SDCBP	1.4e-44	0.40027	0.733	0.438	3.19e-40		GPR137B	8.52791e-27	0.261613	0.207	0.078	1.9395e-22		SERPINB5	9.91269e-29	0.413718	0.173	0.041	2.25444e-24		CTNNA1	7.35e-26	0.174085	0.342	0.206	1.67e-21		RHOD	1.9e-27	0.32763	0.153	0.046	4.31e-23
RUNX1	1.2e-33	0.254363	0.315	0.139	2.73e-29		ATP6V1C1	2.97e-54	0.398971	0.317	0.09	6.75e-50		MKNK1	9.85921e-34	0.261152	0.247	0.09	2.24228e-29		RAB32	5.77663e-63	0.413598	0.342	0.076	1.31378e-58		CFH	7.89e-24	0.173852	0.207	0.103	1.79e-19		GPX4	1.31e-38	0.327567	0.707	0.445	2.97e-34
MAP2K3	5.61e-26	0.254109	0.309	0.154	1.28e-21		TRAPPC5	1.11e-56	0.398757	0.493	0.205	2.53e-52		CIAO2A	1.77102e-34	0.260752	0.399	0.198	4.02783e-30		MIR155HG	4.52032e-21	0.413513	0.272	0.124	1.02806e-16		CDC42EP2	2.93e-22	0.173383	0.151	0.067	6.67e-18		FUCA2	6.75e-52	0.327396	0.397	0.158	1.54e-47
TFPT	4.24e-33	0.253791	0.2	0.062	9.64e-29		QSOX1	5.67e-61	0.39846	0.358	0.102	1.29e-56		MAP1B	3.74135e-12	0.260437	0.119	0.053	8.50895e-08		SUSD6	8.72892e-54	0.413441	0.385	0.116	1.98522e-49		ARNTL2	1.61e-22	0.173316	0.157	0.071	3.66e-18		PTGFRN	1.37e-43	0.326503	0.199	0.051	3.11e-39
FCGR2B	9.19e-17	0.253525	0.123	0.045	2.09e-12		RAB10	1.57e-55	0.397763	0.514	0.224	3.57e-51		QSOX1	4.80013e-38	0.260211	0.28	0.102	1.09169e-33		APOL1	4.77897e-54	0.413325	0.349	0.094	1.08688e-49		EVA1B	5.43e-28	0.17321	0.239	0.118	1.24e-23		ARAP1	2.53e-41	0.326309	0.297	0.11	5.76e-37
HES1	2.91e-27	0.2534	0.169	0.053	6.63e-23		ADPGK	1.08e-50	0.397279	0.401	0.15	2.46e-46		PAK1	1.36565e-36	0.260066	0.246	0.083	3.1059e-32		TOM1	1.1572e-51	0.412641	0.345	0.096	2.63183e-47		SSR1	6.76e-19	0.172713	0.371	0.25	1.54e-14		HLA-B	1.75e-36	0.325428	0.982	0.948	3.98e-32
CAPZB	4e-28	0.251167	0.632	0.418	9.09e-24		TPM1	3.27e-34	0.397242	0.303	0.123	7.43e-30		CD274	1.18004e-25	0.259859	0.138	0.036	2.68377e-21		RAB5IF	3.4256e-43	0.412489	0.579	0.287	7.79085e-39		CLTC	4.83e-23	0.172687	0.396	0.252	1.1e-18		RAB10	3.44e-42	0.324793	0.528	0.274	7.82e-38
TFRC	1.23e-21	0.250429	0.305	0.162	2.8e-17		PDIA3	8.51e-34	0.396918	0.669	0.439	1.94e-29		LDLR	1.23475e-30	0.259532	0.257	0.103	2.80819e-26		TNFRSF21	6.99882e-49	0.412211	0.266	0.056	1.59174e-44		DDAH2	2.05e-23	0.172677	0.27	0.152	4.67e-19		SERPINH1	5.5e-29	0.324298	0.279	0.12	1.25e-24
GAS6	9.24e-31	0.250258	0.235	0.091	2.1e-26		SERPINB2	6.25e-29	0.396545	0.119	0.017	1.42e-24		CCN1	4.18619e-14	0.2594	0.17	0.084	9.52065e-10		RHOG	1.35808e-43	0.41212	0.585	0.268	3.08868e-39		TXNDC12	4.71e-25	0.172313	0.278	0.154	1.07e-20		CYSTM1	1.55e-53	0.323873	0.487	0.215	3.51e-49
APOL1	3.4e-33	0.249445	0.249	0.094	7.74e-29		NR4A3	8.09e-35	0.396379	0.463	0.24	1.84e-30		TNS4	3.93524e-16	0.259383	0.106	0.035	8.94991e-12		NCOA4	1.98915e-52	0.411913	0.445	0.157	4.52393e-48		CTNNAL1	6.03e-17	0.172065	0.13	0.062	1.37e-12		RAB5C	1.98e-38	0.323445	0.504	0.264	4.5e-34
CD59	1.24e-30	0.249265	0.409	0.224	2.82e-26		RAB32	9e-62	0.395633	0.314	0.076	2.05e-57		RHOC	9.258e-31	0.259382	0.392	0.203	2.10555e-26		PPP1R18	8.0448e-43	0.411236	0.457	0.188	1.82963e-38		GAA	5.12e-22	0.171892	0.218	0.116	1.16e-17		MYO1G	3.17e-26	0.322944	0.373	0.194	7.21e-22
SDC1	2.02e-10	0.249144	0.125	0.065	4.58e-06		CIAO2A	4.22e-53	0.39559	0.473	0.198	9.59e-49		SLC16A3	1.52135e-27	0.257965	0.332	0.164	3.46001e-23		LUM	4.05762e-14	0.409812	0.133	0.049	9.22824e-10		CAPZB	3.75e-21	0.171867	0.639	0.482	8.54e-17		TACSTD2	2.18e-22	0.322753	0.153	0.054	4.96e-18
RILPL2	3.25e-23	0.248626	0.408	0.241	7.4e-19		ALCAM	3.85e-54	0.394261	0.254	0.053	8.77e-50		TMEM14C	2.83271e-28	0.257638	0.383	0.209	6.44244e-24		DNAJC15	9.40409e-35	0.409746	0.601	0.32	2.13877e-30		PDGFRB	1.15e-10	0.171833	0.119	0.067	2.62e-06		TPD52L2	8.46e-48	0.322617	0.362	0.142	1.92e-43
ITGA6	0.000372971	0.247574	0.16	0.123	1		ALDH2	9.39e-52	0.393791	0.244	0.05	2.14e-47		PPIB	1.84812e-17	0.256893	0.662	0.52	4.20317e-13		HTRA1	2.31043e-30	0.409612	0.27	0.096	5.25461e-26		PLOD1	5.4e-27	0.171458	0.199	0.092	1.23e-22		JUP	9.23e-34	0.322078	0.247	0.093	2.1e-29
NFE2L2	2.34e-27	0.247416	0.553	0.344	5.31e-23		CAPZB	7.65e-45	0.39203	0.713	0.418	1.74e-40		PTHLH	2.84731e-11	0.256712	0.107	0.048	6.47563e-07		MOB1A	1.16052e-42	0.409516	0.639	0.324	2.63937e-38		HPSE	3.14e-21	0.171308	0.132	0.055	7.15e-17		TRAPPC5	9.98e-46	0.322058	0.525	0.259	2.27e-41
ACOT9	1.54e-28	0.247346	0.331	0.164	3.5e-24		NRG1	2.02e-50	0.391895	0.179	0.017	4.6e-46		RNASEK	1.28559e-20	0.25662	0.764	0.6	2.92382e-16		CD274	6.63412e-42	0.409406	0.204	0.036	1.5088e-37		CISD2	2.07e-20	0.171165	0.373	0.246	4.7e-16		PFKFB3	6.14e-23	0.321428	0.507	0.317	1.4e-18
CD274	2.58e-24	0.247155	0.133	0.036	5.88e-20		SPG21	1.84e-51	0.391699	0.438	0.174	4.19e-47		CAPZB	6.15562e-29	0.256336	0.639	0.418	1.39997e-24		PLEKHB2	1.47842e-47	0.408705	0.552	0.236	3.36237e-43		ERRFI1	1.96e-19	0.171136	0.229	0.13	4.47e-15		PLEKHB2	5.95e-37	0.320923	0.552	0.295	1.35e-32
UCP2	1.82e-14	0.246774	0.433	0.3	4.14e-10		PSMD2	5.25e-32	0.391433	0.444	0.235	1.19e-27		PEA15	3.32912e-30	0.256173	0.29	0.127	7.57141e-26		NRG1	2.19159e-53	0.408634	0.198	0.017	4.98433e-49		S100A16	6.61e-15	0.170908	0.206	0.127	1.5e-10		SFT2D1	1.97e-45	0.320479	0.458	0.211	4.49e-41
TAP1	5.93e-21	0.24662	0.591	0.409	1.35e-16		CDC42EP2	1.42e-43	0.391367	0.197	0.038	3.24e-39		GGT5	6.16226e-22	0.256108	0.173	0.067	1.40148e-17		TRAPPC5	2.33393e-54	0.407297	0.525	0.205	5.30806e-50		ARL8B	5.17e-26	0.170413	0.403	0.251	1.18e-21		PHACTR1	9.39e-20	0.320456	0.21	0.098	2.14e-15
IFIT1	1.36e-14	0.246317	0.324	0.203	3.08e-10		HPSE	6.3e-44	0.389717	0.197	0.035	1.43e-39		H1F0	2.06089e-34	0.256002	0.236	0.08	4.68707e-30		RILPL2	1.60073e-37	0.407081	0.51	0.241	3.64054e-33		TNS3	1.81e-21	0.170224	0.184	0.092	4.11e-17		SESN2	9.02e-32	0.320342	0.242	0.092	2.05e-27
EDEM1	5.8e-26	0.246033	0.249	0.11	1.32e-21		RAB13	1.84e-49	0.389523	0.344	0.115	4.18e-45		ALDH2	3.1295e-32	0.255961	0.181	0.05	7.11743e-28		MCL1	4.65321e-28	0.406587	0.868	0.615	1.05828e-23		OAZ1	2.11e-16	0.170074	0.865	0.783	4.81e-12		SERPINB6	1.52e-47	0.319755	0.43	0.181	3.45e-43
BCAT1	1.44e-33	0.245339	0.187	0.053	3.28e-29		CSF2RA	4.85e-37	0.389003	0.154	0.023	1.1e-32		MCOLN1	7.43688e-37	0.25581	0.196	0.051	1.69137e-32		SSB	1.11068e-40	0.406403	0.522	0.233	2.52601e-36		S100A4	6.2e-19	0.169957	0.709	0.555	1.41e-14		ETV5	8.43e-51	0.319555	0.236	0.061	1.92e-46
COL12A1	1.36e-14	0.244272	0.128	0.054	3.1e-10		HLA-B	3.17e-53	0.388873	0.982	0.934	7.21e-49		IFIT1	1.64764e-15	0.25544	0.331	0.203	3.74724e-11		SDCBP	1.03674e-37	0.4061	0.749	0.438	2.35786e-33		SDC2	5.54e-20	0.169264	0.135	0.06	1.26e-15		TMBIM1	1.65e-45	0.319271	0.388	0.162	3.74e-41
PDIA4	8.52e-29	0.243903	0.317	0.156	1.94e-24		RAB5C	1.11e-51	0.3886	0.479	0.204	2.53e-47		PSTPIP2	2.11233e-32	0.255437	0.171	0.044	4.80407e-28		PHACTR1	6.14602e-27	0.405701	0.21	0.067	1.39779e-22		SERPINB6	3.7e-28	0.169145	0.325	0.181	8.42e-24		OSBPL1A	1.52e-53	0.319151	0.272	0.076	3.47e-49
ANXA11	1.65e-30	0.243869	0.42	0.227	3.74e-26		ACOT9	2.53e-51	0.38859	0.422	0.164	5.75e-47		ATP2A2	4.70053e-32	0.255091	0.403	0.207	1.06904e-27		POSTN	2.80778e-13	0.403072	0.106	0.035	6.38573e-09		ANAPC11	5.53e-20	0.169131	0.538	0.393	1.26e-15		IER5	1.41e-30	0.318832	0.521	0.295	3.21e-26
ATP2A2	8.41e-31	0.243833	0.396	0.207	1.91e-26		PHLDA2	4.22e-65	0.387989	0.41	0.128	9.59e-61		RRAD	1.33477e-17	0.25487	0.133	0.049	3.03568e-13		CSF2RA	9.28692e-38	0.402493	0.165	0.023	2.11213e-33		ADAM17	5.6e-22	0.169083	0.266	0.15	1.27e-17		BHLHE40	1.89e-33	0.318709	0.568	0.319	4.3e-29
GLMP	4.62e-37	0.243452	0.218	0.066	1.05e-32		ACP2	5.64e-60	0.387968	0.254	0.044	1.28e-55		GAS6	8.73649e-33	0.254683	0.244	0.091	1.98694e-28		PSME2	1.05875e-30	0.402005	0.776	0.529	2.40791e-26		GAS6	8.87e-27	0.169033	0.244	0.126	2.02e-22		ATP6V1C1	7.26e-45	0.31801	0.335	0.128	1.65e-40
PAK1	7.98e-35	0.243213	0.238	0.083	1.82e-30		UCP2	9.25e-29	0.387028	0.517	0.3	2.1e-24		TFRC	4.3892e-22	0.25465	0.31	0.162	9.98235e-18		RAB13	3.37763e-51	0.401966	0.378	0.115	7.68174e-47		CCN2	3.83e-14	0.16897	0.156	0.086	8.71e-10		FCGR2B	5.55e-26	0.317743	0.19	0.07	1.26e-21
PIK3AP1	3.74e-25	0.243006	0.216	0.09	8.51e-21		COL5A1	4.1e-24	0.386054	0.186	0.065	9.33e-20		PIK3AP1	6.87826e-26	0.254089	0.221	0.09	1.56432e-21		CANX	1.60748e-40	0.400878	0.609	0.318	3.6559e-36		RAB10	6.2e-24	0.168558	0.42	0.274	1.41e-19		SIGLEC10	1.04e-32	0.317528	0.17	0.049	2.36e-28
AKR1B1	2.67e-27	0.242967	0.287	0.135	6.08e-23		SMIM3	3.02e-48	0.385971	0.333	0.11	6.88e-44		SDCCAG8	1.05139e-32	0.254047	0.254	0.097	2.39117e-28		PFKFB3	1.34975e-29	0.400334	0.507	0.264	3.06975e-25		TFRC	3.79e-15	0.168511	0.31	0.204	8.61e-11		AP1B1	2.08e-48	0.31752	0.355	0.133	4.73e-44
SDCBP	1.91e-25	0.242931	0.646	0.438	4.33e-21		PACSIN2	4.29e-54	0.385462	0.293	0.075	9.75e-50		FCGR2B	7.67705e-17	0.253531	0.124	0.045	1.74599e-12		MANBA	1.02064e-45	0.398189	0.361	0.115	2.32123e-41		SNX8	1.46e-19	0.168506	0.207	0.113	3.32e-15		DAPK1	6.73e-55	0.317392	0.264	0.069	1.53e-50
MKNK1	4.4e-30	0.242871	0.233	0.09	1e-25		AGAP3	1.73e-56	0.385223	0.295	0.074	3.93e-52		NAGK	1.58313e-39	0.253496	0.354	0.151	3.60051e-35		ACP2	1.44498e-57	0.397801	0.266	0.044	3.28633e-53		CFL1	5.02e-19	0.167808	0.902	0.818	1.14e-14		SIGLEC12	3.23e-40	0.317031	0.153	0.03	7.36e-36
CAMK1	2.53e-27	0.242767	0.132	0.03	5.75e-23		SSB	1.34e-43	0.385192	0.499	0.233	3.05e-39		ARF3	1.55524e-37	0.253275	0.36	0.159	3.53708e-33		TPRA1	2.87224e-44	0.397402	0.304	0.085	6.53234e-40		MYO1B	5.21e-19	0.167684	0.179	0.094	1.18e-14		GCA	8.12e-41	0.316983	0.38	0.162	1.85e-36
IGF2R	1.36e-35	0.24252	0.373	0.178	3.1e-31		EDEM1	1.25e-41	0.384983	0.314	0.11	2.85e-37		RUNX1	1.57922e-35	0.253184	0.325	0.139	3.59163e-31		SDCCAG8	3.86414e-55	0.397152	0.356	0.097	8.78822e-51		RIPK2	2.65e-23	0.167574	0.317	0.187	6.02e-19		DEK	3.61e-34	0.31653	0.63	0.376	8.21e-30
PABPC4	1.69e-26	0.242101	0.355	0.186	3.83e-22		GAS6	4.65e-51	0.383949	0.308	0.091	1.06e-46		RALGDS	1.527e-25	0.252653	0.321	0.16	3.47286e-21		QSOX1	5.44784e-60	0.397024	0.383	0.102	1.239e-55		JAG1	3.46e-23	0.167293	0.182	0.087	7.86e-19		BSG	1.26e-27	0.316022	0.483	0.289	2.86e-23
MDM2	7.04e-27	0.2408	0.256	0.113	1.6e-22		CDH3	1.55e-26	0.383894	0.116	0.019	3.51e-22		BSG	1.84709e-26	0.252465	0.418	0.239	4.20085e-22		KIAA0930	3.33638e-56	0.395894	0.327	0.078	7.58792e-52		PSMA3	8.86e-21	0.167288	0.43	0.291	2.01e-16		CD83	3.69e-58	0.315911	0.629	0.307	8.39e-54
SLC7A8	3.85e-28	0.240778	0.111	0.017	8.75e-24		CPVL	1.35e-58	0.383823	0.239	0.036	3.07e-54		TLR4	7.52862e-26	0.252334	0.13	0.031	1.71223e-21		ATP6V1C1	5.56515e-52	0.39574	0.335	0.09	1.26568e-47		CD80	8.69e-16	0.166979	0.145	0.075	1.98e-11		SSR1	7.58e-34	0.315663	0.466	0.25	1.73e-29
CLTC	1.34e-32	0.240347	0.39	0.195	3.05e-28		SIGLEC10	3.79e-41	0.382996	0.164	0.022	8.63e-37		CD59	4.68134e-31	0.252199	0.413	0.224	1.06468e-26		PIM3	1.14406e-38	0.395587	0.604	0.298	2.60194e-34		ACTG1	1.07e-10	0.166462	0.834	0.739	2.43e-06		SDHB	5.87e-43	0.315376	0.432	0.198	1.34e-38
RPS27L	4.13e-29	0.240183	0.606	0.396	9.4e-25		LEPROT	5.16e-57	0.382184	0.461	0.176	1.17e-52		CLIC4	3.07246e-33	0.25163	0.283	0.117	6.9877e-29		KIFC3	3.74659e-60	0.39551	0.324	0.069	8.52087e-56		ZFHX3	2.83e-27	0.166436	0.19	0.084	6.43e-23		SSB	5.68e-31	0.315031	0.522	0.294	1.29e-26
CFL1	9.45e-23	0.24018	0.899	0.783	2.15e-18		TFPT	2.95e-55	0.382171	0.274	0.062	6.71e-51		CAMK1	5.08552e-28	0.251309	0.135	0.03	1.1566e-23		CALB1	6.56755e-32	0.394556	0.16	0.029	1.49366e-27		PTPN12	2e-30	0.165838	0.321	0.173	4.54e-26		KIAA0930	2.21e-49	0.313306	0.327	0.115	5.03e-45
UBE2L6	2.08e-28	0.239534	0.492	0.288	4.73e-24		CEP170	8.57e-53	0.381705	0.32	0.094	1.95e-48		RAB5IF	3.58854e-28	0.251046	0.483	0.287	8.16143e-24		PDIA4	1.58102e-40	0.39453	0.395	0.156	3.59572e-36		IL18BP	8.48e-20	0.165533	0.201	0.108	1.93e-15		QSOX1	2.06e-50	0.312516	0.383	0.149	4.68e-46
ZMIZ1	8.49e-30	0.239503	0.233	0.091	1.93e-25		NPTN	1.65e-53	0.381493	0.384	0.136	3.76e-49		PSMA7	3.05848e-22	0.250769	0.694	0.498	6.95589e-18		OSBPL1A	3.6389e-60	0.394436	0.272	0.044	8.27594e-56		TNFRSF21	4.42e-24	0.165462	0.195	0.093	1e-19		FAM83A	3.22e-35	0.312267	0.13	0.024	7.33e-31
SAMHD1	3.43e-26	0.239303	0.558	0.355	7.8e-22		PEA15	8.36e-50	0.381276	0.362	0.127	1.9e-45		SPG21	1.43604e-32	0.250183	0.363	0.174	3.26598e-28		CLCA2	1.07996e-32	0.39392	0.143	0.019	2.45615e-28		ARAP1	1.68e-24	0.165333	0.218	0.11	3.81e-20		TNFRSF21	2.59e-39	0.31224	0.266	0.093	5.89e-35
RALB	1.13e-31	0.238991	0.201	0.065	2.57e-27		CAMK1	1.78e-44	0.381032	0.187	0.03	4.05e-40		RPS27L	1.47409e-29	0.249528	0.612	0.396	3.35252e-25		IL18	1.93279e-52	0.393256	0.222	0.029	4.39575e-48		KLF10	8.69e-23	0.165263	0.29	0.167	1.98e-18		CASP4	2.4e-39	0.312059	0.437	0.205	5.47e-35
SLC43A3	3.61e-35	0.238868	0.221	0.071	8.21e-31		AKR1B1	1.18e-43	0.380393	0.356	0.135	2.69e-39		UCP2	2.09213e-14	0.249052	0.436	0.3	4.75814e-10		TAP1	9.80636e-28	0.392216	0.662	0.409	2.23026e-23		CD4	7.28e-16	0.165206	0.234	0.143	1.65e-11		SRC	4.03e-49	0.312044	0.23	0.059	9.16e-45
RHOG	3.1e-28	0.238139	0.471	0.268	7.06e-24		AC007952.4	7.19e-27	0.379294	0.179	0.057	1.64e-22		TFPT	7.7537e-33	0.248685	0.201	0.062	1.76342e-28		C5AR2	1.91536e-28	0.392137	0.104	0.008	4.3561e-24		ACP2	5.44e-31	0.164991	0.196	0.082	1.24e-26		CPVL	2.99e-46	0.311978	0.244	0.069	6.79e-42
NR4A3	1.29e-16	0.237958	0.374	0.24	2.93e-12		IL13RA1	2.46e-51	0.37857	0.257	0.059	5.6e-47		PACSIN2	1.47407e-33	0.248615	0.224	0.075	3.35248e-29		TPD52L2	3.64349e-54	0.392031	0.362	0.103	8.28639e-50		PITPNA	7.09e-24	0.164954	0.263	0.145	1.61e-19		CDC20	3.45e-34	0.311723	0.133	0.027	7.84e-30
RHOC	3.24e-29	0.237422	0.383	0.203	7.36e-25		H1F0	8.66e-52	0.378505	0.297	0.08	1.97e-47		CLTC	2.44421e-33	0.247919	0.396	0.195	5.55888e-29		ALDH2	2.7428e-51	0.391985	0.26	0.05	6.23794e-47		VPS35	7.39e-25	0.164397	0.339	0.203	1.68e-20		CSTA	1.1e-61	0.311502	0.301	0.081	2.5e-57
GNA15	3.72e-28	0.236686	0.221	0.087	8.47e-24		SDC2	1.64e-37	0.377256	0.169	0.031	3.73e-33		H3F3A	1.8652e-15	0.247348	0.868	0.744	4.24202e-11		LDLR	1.63046e-42	0.390835	0.328	0.103	3.70814e-38		SSR3	9.96e-12	0.164118	0.471	0.366	2.27e-07		MCL1	1.03e-20	0.311362	0.868	0.673	2.35e-16
MANBA	2.52e-27	0.2364	0.262	0.115	5.73e-23		LDLR	3.3e-44	0.375894	0.31	0.103	7.51e-40		SRC	5.17214e-34	0.246805	0.143	0.024	1.1763e-29		CKAP4	4.3283e-34	0.390808	0.255	0.082	9.84385e-30		RB1	3.96e-23	0.164032	0.379	0.24	9.01e-19		LCP1	2.77e-13	0.31095	0.574	0.431	6.31e-09
CAPZA2	2.63e-34	0.236055	0.432	0.225	5.97e-30		CD81	1.39e-31	0.375606	0.744	0.527	3.16e-27		CFL1	6.5302e-24	0.246197	0.902	0.783	1.48516e-19		CPVL	1.07384e-54	0.390375	0.244	0.036	2.44224e-50		SNAI2	3.23e-22	0.164028	0.142	0.061	7.35e-18		CSF2RA	3.75e-31	0.310156	0.165	0.047	8.53e-27
SYNGR2	2.21e-23	0.235756	0.425	0.255	5.03e-19		LILRA6	7.13e-46	0.375222	0.156	0.012	1.62e-41		CREB5	9.4752e-30	0.245546	0.174	0.051	2.15494e-25		PACSIN2	2.34837e-52	0.389493	0.311	0.075	5.3409e-48		NUCB1	1.25e-22	0.163951	0.387	0.245	2.84e-18		C5AR2	3.08e-24	0.308956	0.104	0.024	7e-20
CLIC4	6.7e-31	0.235713	0.273	0.117	1.52e-26		TNC	1.47e-30	0.375199	0.171	0.043	3.33e-26		PSMD2	4.53056e-23	0.245308	0.401	0.235	1.03038e-18		PHLDA2	4.57619e-61	0.389457	0.431	0.128	1.04076e-56		CD59	1.65e-21	0.163863	0.413	0.282	3.76e-17		ZFHX3	9.22e-47	0.308832	0.269	0.084	2.1e-42
DST	1.25e-20	0.23552	0.206	0.094	2.84e-16		ADAMTSL4	2.19e-48	0.374161	0.179	0.02	4.97e-44		NCOA4	2.27143e-33	0.245151	0.34	0.157	5.16591e-29		SIGLEC10	4.385e-40	0.389363	0.17	0.022	9.9728e-36		NOP10	4.34e-22	0.163714	0.56	0.406	9.86e-18		RHOG	9.17e-33	0.308704	0.585	0.333	2.09e-28
ANAPC11	2.08e-23	0.235135	0.53	0.34	4.73e-19		AL031590.1	2.55e-31	0.373529	0.109	0.009	5.8e-27		HES1	3.18792e-28	0.243967	0.173	0.053	7.25028e-24		ABHD12	1.79395e-56	0.388489	0.407	0.122	4.07997e-52		EIF4G1	5.48e-15	0.163687	0.358	0.255	1.25e-10		HDGF	2.04e-33	0.308233	0.383	0.19	4.64e-29
RNF181	1.25e-31	0.234926	0.492	0.275	2.85e-27		AMPD2	1.54e-43	0.373212	0.247	0.066	3.51e-39		SAMHD1	5.49523e-27	0.243831	0.567	0.355	1.24978e-22		APP	1.07065e-39	0.388326	0.425	0.171	2.43499e-35		RAP2B	2.16e-23	0.163643	0.242	0.13	4.92e-19		TPRA1	2.45e-37	0.307894	0.304	0.121	5.57e-33
ARF3	7.3e-36	0.234796	0.351	0.159	1.66e-31		RENBP	8.57e-47	0.372831	0.192	0.028	1.95e-42		THBS2	2.41452e-20	0.24301	0.121	0.035	5.49134e-16		CEP170	3.35002e-52	0.388291	0.344	0.094	7.61896e-48		POMP	3.26e-20	0.163561	0.671	0.532	7.41e-16		TRAF1	2.72e-21	0.307099	0.303	0.159	6.19e-17
SDCCAG8	8.89e-30	0.234548	0.242	0.097	2.02e-25		RRBP1	4.1e-49	0.372583	0.477	0.21	9.32e-45		ANAPC11	1.16819e-24	0.242584	0.538	0.34	2.65682e-20		RHBDF2	1.1892e-49	0.388177	0.336	0.093	2.70461e-45		PEA15	1.08e-20	0.163488	0.29	0.174	2.46e-16		GCH1	7.62e-32	0.306789	0.325	0.145	1.73e-27
PSMA7	6.18e-21	0.234376	0.688	0.498	1.4e-16		H3F3A	8.98e-28	0.371356	0.906	0.744	2.04e-23		PABPC4	2.95547e-27	0.242527	0.362	0.186	6.72162e-23		UBE2L6	5.80583e-40	0.38786	0.589	0.288	1.32042e-35		PLSCR1	1.97e-18	0.163459	0.589	0.442	4.48e-14		IL13RA1	1.45e-42	0.306336	0.27	0.092	3.3e-38
CAVIN1	9.77e-19	0.234269	0.214	0.105	2.22e-14		TPRA1	4.8e-43	0.370673	0.278	0.085	1.09e-38		AKR1B1	2.05369e-28	0.241635	0.294	0.135	4.67071e-24		TP63	3.14796e-36	0.387586	0.149	0.018	7.15941e-32		EI24	2.33e-18	0.163309	0.235	0.139	5.3e-14		SUSD6	2.88e-40	0.305812	0.385	0.17	6.54e-36
ATP5PD	7.26e-27	0.233909	0.562	0.357	1.65e-22		OSBPL1A	1.01e-56	0.370267	0.245	0.044	2.31e-52		CEP170	1.63981e-31	0.241445	0.246	0.094	3.72941e-27		CAPZB	1.4831e-36	0.387378	0.728	0.418	3.373e-32		ALCAM	4.48e-21	0.163299	0.177	0.088	1.02e-16		MOB1A	2.89e-33	0.305635	0.639	0.383	6.58e-29
CSTB	6.59e-23	0.233892	0.626	0.433	1.5e-18		ABHD12	9.28e-59	0.369643	0.383	0.122	2.11e-54		RILPL2	9.16449e-22	0.240715	0.406	0.241	2.08428e-17		IL13RA1	1.78445e-49	0.386562	0.27	0.059	4.05838e-45		RAB1A	2.94e-26	0.163293	0.431	0.275	6.68e-22		DNAJC15	2.1e-26	0.305311	0.601	0.38	4.77e-22
HSD3B7	7.74e-27	0.23349	0.118	0.023	1.76e-22		PFKFB3	6.46e-33	0.369517	0.493	0.264	1.47e-28		ACOT9	2.77319e-29	0.240639	0.337	0.164	6.30705e-25		HSP90B1	1.58175e-29	0.386432	0.71	0.468	3.59737e-25		BLOC1S1	1.12e-18	0.162741	0.592	0.433	2.56e-14		COL1A1	6.36e-25	0.304949	0.243	0.107	1.45e-20
THBS2	2.34e-18	0.233382	0.113	0.035	5.31e-14		ANXA11	7.04e-46	0.36903	0.493	0.227	1.6e-41		GNA15	3.00434e-29	0.240411	0.227	0.087	6.83276e-25		SFT2D1	2.29301e-50	0.386406	0.458	0.17	5.21499e-46		SAMHD1	4.42e-19	0.162715	0.567	0.411	1e-14		ACSL3	4.57e-44	0.304049	0.373	0.155	1.04e-39
CKAP4	3.04e-23	0.233085	0.195	0.082	6.92e-19		ARPC1B	6.44e-42	0.368902	0.75	0.458	1.47e-37		NFE2L2	1.34301e-26	0.240205	0.555	0.344	3.0544e-22		AKR1B1	4.05527e-44	0.385604	0.384	0.135	9.22291e-40		HMGA1	1.08e-15	0.162582	0.276	0.179	2.45e-11		MAP2K3	3.47e-27	0.303738	0.396	0.208	7.9e-23
IL13RA1	2.92e-28	0.232888	0.18	0.059	6.65e-24		SLC11A2	6.52e-38	0.368833	0.242	0.074	1.48e-33		MAP2K3	3.61976e-25	0.240051	0.309	0.154	8.23243e-21		PEA15	5.07868e-44	0.384632	0.37	0.127	1.15504e-39		TUBB6	7.73e-26	0.162411	0.228	0.116	1.76e-21		CTNNAL1	5.27e-29	0.303506	0.182	0.062	1.2e-24
CLTA	1.83e-28	0.232637	0.474	0.274	4.16e-24		SLC16A3	5.36e-45	0.368289	0.406	0.164	1.22e-40		EDEM1	2.76757e-26	0.239605	0.254	0.11	6.29428e-22		TFPT	7.45759e-53	0.384622	0.287	0.062	1.69608e-48		PA2G4	4.18e-18	0.162038	0.406	0.282	9.5e-14		HMGA1	1.11e-31	0.303412	0.367	0.179	2.53e-27
GSTP1	7.71e-25	0.232263	0.605	0.417	1.75e-20		TPD52L2	4.69e-54	0.368231	0.336	0.103	1.07e-49		ANXA11	2.92444e-30	0.239366	0.425	0.227	6.65105e-26		SYNGR2	4.47513e-40	0.384563	0.544	0.255	1.01778e-35		VAMP3	3.74e-27	0.161835	0.276	0.148	8.5e-23		CAPZB	6.93e-29	0.302909	0.728	0.482	1.58e-24
TRAF1	3.87e-18	0.23202	0.223	0.113	8.81e-14		KRT17	4.01e-18	0.368153	0.274	0.151	9.13e-14		FSTL1	4.76263e-20	0.239195	0.199	0.088	1.08316e-15		SERPINH1	1.71672e-31	0.384045	0.279	0.096	3.90434e-27		ALDH2	1.73e-22	0.16171	0.181	0.087	3.93e-18		CTNNA1	1.28e-40	0.30168	0.434	0.206	2.91e-36
MYL6	8.53e-28	0.231527	0.921	0.834	1.94e-23		SLC37A2	1.1e-53	0.367625	0.176	0.011	2.51e-49		SERINC2	2.83222e-24	0.238023	0.175	0.063	6.44131e-20		LEPROT	3.54757e-52	0.383835	0.482	0.176	8.06825e-48		ZNF385A	2.21e-24	0.161581	0.128	0.047	5.04e-20		PRKCD	2.5e-42	0.301609	0.268	0.09	5.7e-38
NEAT1	1.28e-23	0.231287	0.86	0.718	2.92e-19		CANX	5.18e-45	0.367092	0.589	0.318	1.18e-40		HSD3B7	1.40163e-28	0.237484	0.124	0.023	3.18773e-24		GNB1	9.07801e-41	0.382956	0.627	0.318	2.06461e-36		SNX6	6.03e-19	0.161463	0.549	0.407	1.37e-14		NADK	4.52e-41	0.301449	0.312	0.118	1.03e-36
MGST3	1.77e-24	0.231007	0.41	0.235	4.02e-20		SAMHD1	5.8e-41	0.366844	0.637	0.355	1.32e-36		IL13RA1	1.64884e-29	0.236622	0.186	0.059	3.74996e-25		SDC2	1.02325e-34	0.381864	0.171	0.031	2.32718e-30		PDXK	1.93e-21	0.161344	0.43	0.291	4.4e-17		MIR155HG	1.65e-14	0.300597	0.272	0.16	3.74e-10
SLC11A2	1.34e-20	0.230706	0.177	0.074	3.04e-16		CLTC	5.32e-52	0.366836	0.472	0.195	1.21e-47		ALCAM	1.2466e-29	0.236557	0.177	0.053	2.83515e-25		BGN	3.6281e-22	0.381819	0.176	0.056	8.25138e-18		HDGF	1.71e-20	0.161009	0.306	0.19	3.89e-16		AMPD2	4.92e-39	0.299981	0.257	0.089	1.12e-34
MCL1	2.39e-17	0.230609	0.794	0.615	5.44e-13		CTNNA1	5.19e-55	0.366681	0.418	0.155	1.18e-50		NRG1	4.58076e-30	0.236492	0.119	0.017	1.0418e-25		GCH1	8.3165e-40	0.381693	0.325	0.104	1.89142e-35		MESD	3.07e-19	0.160803	0.368	0.243	6.97e-15		RHBDF2	1.45e-42	0.299924	0.336	0.131	3.29e-38
H1F0	1.13e-31	0.230385	0.226	0.08	2.56e-27		SIGLEC14	2.11e-36	0.366666	0.144	0.019	4.8e-32		MBD2	5.01251e-32	0.236092	0.425	0.219	1.13999e-27		C11orf96	2.85304e-15	0.381297	0.162	0.065	6.48866e-11		FUCA2	2.26e-31	0.160584	0.298	0.158	5.13e-27		TNFRSF12A	3.47e-24	0.299872	0.263	0.123	7.9e-20
BSG	2.32e-25	0.230045	0.411	0.239	5.28e-21		MCL1	6.65e-30	0.366506	0.849	0.615	1.51e-25		KIFC3	2.61452e-38	0.236011	0.23	0.069	5.9462e-34		BMP2K	2.55153e-46	0.380878	0.317	0.089	5.80294e-42		ITGA3	1.81e-21	0.160523	0.133	0.055	4.12e-17		RAB13	1.96e-41	0.299108	0.378	0.159	4.46e-37
ALCAM	9.08e-29	0.229987	0.173	0.053	2.07e-24		PIM3	1.48e-39	0.366176	0.569	0.298	3.35e-35		TKT	2.61582e-33	0.235659	0.326	0.147	5.94916e-29		VPS35	1.22515e-48	0.380286	0.446	0.165	2.78635e-44		UCP2	2.01e-09	0.16035	0.436	0.343	4.57e-05		JAG1	2.72e-37	0.298986	0.247	0.087	6.18e-33
ARPC1B	4.93e-25	0.229617	0.671	0.458	1.12e-20		PDIA4	4.2e-42	0.365725	0.374	0.156	9.55e-38		KDELR1	7.45326e-26	0.235201	0.409	0.235	1.69509e-21		RAB10	5.37876e-48	0.378875	0.528	0.224	1.22329e-43		ATG3	3.51e-27	0.160237	0.359	0.211	7.98e-23		PSMA6	1.85e-30	0.298145	0.706	0.467	4.22e-26
HAVCR2	4.84e-23	0.22949	0.237	0.11	1.1e-18		TNFRSF21	2.54e-46	0.36566	0.241	0.056	5.78e-42		UBE2L6	1.38117e-28	0.235118	0.497	0.288	3.1412e-24		EDEM1	3.07292e-37	0.376376	0.324	0.11	6.98874e-33		JDP2	6.29e-30	0.160178	0.224	0.103	1.43e-25		ALDH2	2.15e-41	0.297735	0.26	0.087	4.89e-37
RCN3	1.8e-18	0.229154	0.141	0.054	4.1e-14		VIM	4e-30	0.365227	0.885	0.683	9.09e-26		CTNNA1	7.58485e-35	0.234689	0.342	0.155	1.72502e-30		CD81	7.30421e-27	0.376223	0.766	0.527	1.6612e-22		RNASEK	1.75e-11	0.159696	0.764	0.655	3.99e-07		IGF2BP2	1.52e-44	0.297013	0.203	0.051	3.46e-40
DAPK1	2.35e-29	0.229058	0.155	0.04	5.33e-25		STXBP2	8.14e-40	0.363777	0.418	0.186	1.85e-35		SLC43A3	2.06623e-36	0.233796	0.227	0.071	4.69924e-32		ZFHX3	3.42291e-51	0.376133	0.269	0.055	7.78473e-47		ALOX5	6.34e-16	0.159488	0.159	0.085	1.44e-11		RILPL2	7.07e-26	0.296896	0.51	0.305	1.61e-21
PPIB	5.9e-16	0.228511	0.655	0.52	1.34e-11		ATP2A2	1.66e-47	0.362932	0.47	0.207	3.77e-43		ZFHX3	1.54506e-32	0.233738	0.19	0.055	3.51393e-28		SAMHD1	3.5888e-38	0.375887	0.67	0.355	8.162e-34		PTPN6	2.35e-13	0.15943	0.299	0.205	5.35e-09		CLN8	1.09e-28	0.296863	0.246	0.101	2.49e-24
RAB5IF	3.92e-26	0.22829	0.472	0.287	8.92e-22		APOL1	9.28e-51	0.362252	0.316	0.094	2.11e-46		GLMP	1.97561e-38	0.233519	0.225	0.066	4.49312e-34		TMSB10	8.96436e-53	0.375664	0.991	0.933	2.03876e-48		PTGFRN	8.08e-25	0.159163	0.134	0.051	1.84e-20		PITPNA	1.23e-41	0.296682	0.353	0.145	2.8e-37
HSPB1	2.19e-31	0.228001	0.464	0.266	4.99e-27		SRGN	1.29e-18	0.361988	0.837	0.729	2.93e-14		AMPD2	2.85288e-26	0.233334	0.187	0.066	6.48831e-22		SESN2	2.66063e-37	0.375528	0.242	0.062	6.05108e-33		GLA	2.54e-16	0.158898	0.257	0.159	5.78e-12		ITGA3	1.21e-36	0.296574	0.192	0.055	2.76e-32
OSBPL1A	1.52e-32	0.227379	0.169	0.044	3.46e-28		TNS3	2.65e-43	0.361754	0.237	0.06	6.03e-39		PITPNA	1.87731e-30	0.232874	0.263	0.107	4.26957e-26		MT1X	3.91005e-25	0.375402	0.555	0.338	8.89263e-21		GNA15	2.73e-21	0.158673	0.227	0.124	6.21e-17		SLC25A24	1.7e-39	0.296543	0.376	0.163	3.87e-35
MIR155HG	7.95e-13	0.227153	0.212	0.124	1.81e-08		IRAK2	6.23e-38	0.360714	0.197	0.046	1.42e-33		ZMIZ1	8.58066e-30	0.232683	0.236	0.091	1.9515e-25		CIAO2A	3.13708e-46	0.375125	0.486	0.198	7.13465e-42		ST14	3.02e-25	0.158596	0.181	0.081	6.86e-21		FST	2.64e-35	0.29554	0.132	0.025	6e-31
CCN1	3.83e-12	0.22697	0.16	0.084	8.72e-08		SPARCL1	1.52e-05	0.359863	0.117	0.071	0.346675		RCN1	2.35784e-26	0.232629	0.25	0.109	5.36244e-22		AP1B1	3.15288e-55	0.375101	0.355	0.094	7.1706e-51		KYNU	8.69e-24	0.158575	0.178	0.082	1.98e-19		ARHGAP31	1.42e-28	0.29494	0.223	0.087	3.22e-24
CEP170	3.62e-29	0.22631	0.236	0.094	8.23e-25		RPS27L	3.18e-44	0.359289	0.681	0.396	7.22e-40		OSBPL1A	2.90098e-34	0.232468	0.176	0.044	6.59769e-30		IL18BP	1.90266e-40	0.374927	0.263	0.07	4.32722e-36		IL18	1.47e-24	0.158551	0.13	0.048	3.34e-20		SAMHD1	3.95e-30	0.294771	0.67	0.411	8.99e-26
SRGN	7.16e-09	0.226064	0.801	0.729	0.000162863		PRKCD	5.17e-49	0.359218	0.252	0.058	1.17e-44		CISD2	4.6511e-30	0.232467	0.373	0.19	1.0578e-25		PRKCD	2.82397e-48	0.373614	0.268	0.058	6.42256e-44		PSMB2	1.06e-17	0.158176	0.482	0.354	2.42e-13		PPIB	5.77e-19	0.294766	0.725	0.557	1.31e-14
PFN1	1.16e-27	0.225466	0.913	0.802	2.63e-23		PITPNA	5.12e-50	0.358933	0.335	0.107	1.16e-45		MDM2	7.40704e-27	0.231761	0.258	0.113	1.68458e-22		SIGLEC12	2.18174e-42	0.373504	0.153	0.012	4.96192e-38		SLC2A1	8.18e-11	0.15791	0.123	0.07	1.86e-06		ITGA5	1.89e-36	0.294497	0.366	0.161	4.29e-32
ZFHX3	2.63e-30	0.225186	0.181	0.055	5.99e-26		RHBDF2	5.88e-48	0.358895	0.307	0.093	1.34e-43		RCN3	7.41766e-20	0.2316	0.148	0.054	1.687e-15		SERPINB6	1.85655e-56	0.373444	0.43	0.133	4.22236e-52		SLC40A1	4.61e-12	0.157713	0.108	0.055	1.05e-07		OAZ2	4.65e-38	0.294088	0.325	0.135	1.06e-33
DBNL	3.01e-30	0.224883	0.325	0.154	6.84e-26		SERPINH1	8.31e-30	0.358741	0.254	0.096	1.89e-25		PDGFRB	1.46774e-12	0.231526	0.119	0.052	3.33808e-08		CLN8	2.18316e-34	0.372182	0.246	0.072	4.96517e-30		HSD3B7	1.18e-23	0.157556	0.124	0.046	2.69e-19		CLTC	1.19e-35	0.293655	0.486	0.252	2.72e-31
PITPNA	8.82e-29	0.224711	0.255	0.107	2.01e-24		COL5A2	2.87e-17	0.358519	0.159	0.064	6.52e-13		RHOG	4.36766e-28	0.231485	0.475	0.268	9.93338e-24		CD83	2.19832e-76	0.371988	0.629	0.228	4.99965e-72		MPZL1	1.04e-24	0.157492	0.206	0.103	2.36e-20		LIMA1	5.29e-19	0.293536	0.281	0.155	1.2e-14
TMEM14C	2.32e-26	0.224245	0.374	0.209	5.27e-22		SIGLEC12	4.27e-41	0.358359	0.143	0.012	9.72e-37		HPSE	8.13605e-24	0.231173	0.132	0.035	1.85038e-19		PSMA6	3.88152e-37	0.371519	0.706	0.407	8.82774e-33		FCGR2B	5.77e-11	0.157473	0.124	0.07	1.31e-06		ADAM17	4.96e-36	0.293214	0.346	0.15	1.13e-31
NRG1	3.99e-27	0.223923	0.11	0.017	9.07e-23		KIAA0930	3.37e-54	0.358359	0.298	0.078	7.67e-50		NEAT1	1.67685e-23	0.230973	0.863	0.718	3.81366e-19		LCP1	9.79934e-17	0.370966	0.574	0.392	2.22866e-12		TFEC	5.89e-21	0.157431	0.156	0.072	1.34e-16		SPARC	4.59e-24	0.292813	0.277	0.128	1.04e-19
SUMO3	7.01e-28	0.223687	0.383	0.202	1.59e-23		GCH1	3.6e-44	0.357557	0.317	0.104	8.18e-40		TNS3	4.34532e-28	0.230786	0.184	0.06	9.88256e-24		ETV5	4.14398e-55	0.369614	0.236	0.033	9.42466e-51		EGFR	1.66e-23	0.157194	0.116	0.041	3.78e-19		TXNDC12	6.87e-34	0.292768	0.34	0.154	1.56e-29
LYSMD2	9.29e-28	0.223342	0.259	0.112	2.11e-23		TAP1	1.99e-31	0.357365	0.647	0.409	4.53e-27		TPM2	1.17243e-16	0.230619	0.237	0.129	2.66646e-12		C1R	6.53477e-27	0.369253	0.247	0.088	1.4862e-22		OSBPL1A	2.21e-26	0.157183	0.176	0.076	5.02e-22		CAMK1	8.61e-35	0.292766	0.196	0.061	1.96e-30
CTNNA1	1.39e-33	0.223263	0.335	0.155	3.17e-29		C11orf96	4.51e-15	0.356966	0.151	0.065	1.02e-10		PHLDA2	5.46757e-39	0.230525	0.32	0.128	1.24349e-34		LILRA6	1.66117e-47	0.369007	0.168	0.012	3.77801e-43		CSTA	1.65e-24	0.156928	0.178	0.081	3.75e-20		TKT	1.09e-36	0.29271	0.396	0.188	2.49e-32
FSTL1	6.24e-18	0.222619	0.189	0.088	1.42e-13		PLXNC1	5.21e-44	0.35606	0.215	0.046	1.19e-39		CFH	1.32367e-26	0.230377	0.207	0.078	3.01042e-22		CLTC	6.89949e-46	0.368887	0.486	0.195	1.56915e-41		MLF2	1.21e-20	0.156557	0.417	0.285	2.76e-16		BMP2K	7.65e-37	0.292553	0.317	0.13	1.74e-32
GJB2	6.84e-18	0.222587	0.108	0.033	1.56e-13		LAT2	6.28e-39	0.355863	0.236	0.067	1.43e-34		RNF181	2.70938e-31	0.229648	0.496	0.275	6.16194e-27		OAZ2	1.49254e-47	0.368001	0.325	0.094	3.39449e-43		ARL5B	1.13e-18	0.156485	0.33	0.212	2.57e-14		MAP7D1	9.15e-37	0.292255	0.394	0.187	2.08e-32
ACSL4	8.33e-32	0.222381	0.285	0.122	1.9e-27		ZFHX3	1.24e-49	0.355595	0.246	0.055	2.81e-45		SDCBP	2.81777e-24	0.228842	0.648	0.438	6.40844e-20		MAP2K1	5.15959e-46	0.367578	0.384	0.128	1.17344e-41		IL13RA1	4.56e-22	0.156396	0.186	0.092	1.04e-17		TMSB10	1.89e-42	0.292121	0.991	0.951	4.29e-38
MFGE8	1.71e-22	0.222157	0.187	0.076	3.89e-18		UBE2L6	4.39e-43	0.355572	0.565	0.288	9.98e-39		CLTA	1.90218e-28	0.228813	0.478	0.274	4.32613e-24		GPR137B	1.14139e-38	0.367449	0.273	0.078	2.59586e-34		CD164	3.7e-18	0.156284	0.559	0.41	8.42e-14		PEA15	2.1e-34	0.291948	0.37	0.174	4.78e-30
2022-03-01	6.23e-23	0.222055	0.179	0.068	1.42e-18		GLMP	3.72e-56	0.354656	0.283	0.066	8.45e-52		CAPZA2	3.17885e-34	0.228809	0.437	0.225	7.22965e-30		CAVIN1	2.18991e-28	0.367221	0.277	0.105	4.98052e-24		UPP1	1.1e-21	0.156099	0.365	0.233	2.51e-17		COL6A1	1.41e-15	0.291462	0.194	0.095	3.21e-11
KIFC3	1.33e-35	0.221839	0.22	0.069	3.03e-31		MSRB2	7.47e-58	0.354566	0.293	0.069	1.7e-53		IGF2R	4.8667e-36	0.228312	0.379	0.178	1.10683e-31		SIGLEC14	1.01017e-38	0.367135	0.159	0.019	2.29744e-34		CANX	1.58e-16	0.15603	0.508	0.38	3.6e-12		HSPB1	2.04e-43	0.291202	0.579	0.317	4.63e-39
CISD2	1.11e-29	0.221673	0.369	0.19	2.52e-25		IGF2R	1.69e-55	0.354548	0.454	0.178	3.83e-51		NUCB1	1.04029e-30	0.228171	0.387	0.196	2.36592e-26		CAMK1	2.45301e-43	0.366927	0.196	0.03	5.57888e-39		SCPEP1	2.58e-26	0.155907	0.254	0.132	5.87e-22		KIF1B	3.2e-37	0.291099	0.286	0.11	7.28e-33
MAP2K1	4.16e-27	0.221211	0.28	0.128	9.45e-23		HSP90B1	6.77e-32	0.354322	0.691	0.468	1.54e-27		PFN1	4.98191e-28	0.228024	0.912	0.802	1.13303e-23		H3F3A	1.03835e-20	0.366683	0.912	0.744	2.36151e-16		S100A14	5.68e-11	0.15578	0.123	0.069	1.29e-06		AKR1B1	8.97e-37	0.291027	0.384	0.176	2.04e-32
MBD2	6.03e-31	0.22107	0.417	0.219	1.37e-26		SERINC2	1.85e-38	0.354227	0.225	0.063	4.2e-34		M6PR	1.36782e-28	0.227608	0.378	0.198	3.11083e-24		AK4	1.71459e-37	0.366523	0.191	0.036	3.89948e-33		PSTPIP2	1.06e-23	0.15553	0.171	0.077	2.4e-19		SIGLEC14	1.11e-31	0.289942	0.159	0.043	2.53e-27
RNF149	4.67e-22	0.220827	0.594	0.4	1.06e-17		RHOU	2.28e-33	0.354061	0.149	0.026	5.19e-29		MFGE8	3.23324e-24	0.226856	0.195	0.076	7.35336e-20		CLTA	3.62337e-43	0.365124	0.582	0.274	8.24062e-39		MSRB2	3.51e-30	0.155116	0.242	0.116	7.99e-26		CISD2	4.8e-31	0.289786	0.455	0.246	1.09e-26
PSMC1	3.53e-29	0.220777	0.318	0.154	8.02e-25		ATP6V0A1	2.02e-41	0.353886	0.22	0.053	4.59e-37		MCL1	1.63247e-16	0.226523	0.798	0.615	3.71273e-12		PITPNA	7.69761e-48	0.364602	0.353	0.107	1.75067e-43		IRAK3	2.29e-21	0.154779	0.235	0.129	5.2e-17		CCT6A	9.08e-25	0.289466	0.441	0.261	2.07e-20
SIGLEC10	4.25e-21	0.220325	0.101	0.022	9.66e-17		STX4	3.31e-47	0.353829	0.362	0.13	7.53e-43		SIGLEC10	3.85439e-21	0.225754	0.102	0.022	8.76605e-17		CTNNA1	9.63268e-50	0.362284	0.434	0.155	2.19076e-45		GPR84	2.46e-17	0.154728	0.115	0.05	5.59e-13		NQO2	3.32e-48	0.288828	0.383	0.153	7.54e-44
PDGFRB	9.48e-12	0.220223	0.115	0.052	2.16e-07		HAVCR2	1.19e-40	0.352561	0.31	0.11	2.7e-36		SYNGR2	1.03102e-22	0.225751	0.426	0.255	2.34485e-18		AL031590.1	1.05402e-29	0.362178	0.109	0.009	2.39715e-25		RUNX1	4.37e-27	0.15436	0.325	0.184	9.94e-23		UBE2L6	1.06e-30	0.288397	0.589	0.351	2.41e-26
IFITM2	2.92e-16	0.2201	0.81	0.634	6.63e-12		LCP1	1.38e-20	0.351935	0.568	0.392	3.14e-16		ZNF385A	6.87026e-29	0.225658	0.128	0.024	1.5625e-24		IGF2R	1.55717e-49	0.361785	0.47	0.178	3.54148e-45		MEST	1.19e-13	0.154296	0.118	0.058	2.71e-09		FSTL3	3.01e-38	0.288129	0.202	0.059	6.84e-34
SLC37A2	2.89e-29	0.220023	0.105	0.011	6.57e-25		CD83	2.01e-89	0.35193	0.615	0.228	4.57e-85		DDAH2	6.12088e-31	0.225442	0.27	0.112	1.39207e-26		ATP6V0A1	2.13587e-36	0.361348	0.22	0.053	4.85761e-32		SEMA4A	1.74e-16	0.154209	0.157	0.082	3.96e-12		ACP2	1.3e-46	0.287683	0.266	0.082	2.95e-42
HPSE	5.9e-22	0.219996	0.125	0.035	1.34e-17		ITGB4	1.89e-21	0.350375	0.135	0.04	4.29e-17		2022-03-01	5.21011e-23	0.22416	0.181	0.068	1.18494e-18		SMIM3	1.51669e-43	0.361323	0.345	0.11	3.44941e-39		RHOD	9.31e-14	0.154115	0.1	0.046	2.12e-09		CTNND1	2.6e-50	0.286931	0.327	0.114	5.91e-46
TNS3	8.16e-27	0.219953	0.179	0.06	1.86e-22		ARHGAP31	1.66e-38	0.35028	0.219	0.057	3.77e-34		MGST3	4.30502e-25	0.223952	0.417	0.235	9.7909e-21		COL5A2	1.22643e-18	0.360943	0.177	0.064	2.78928e-14		SIGLEC10	3.1e-13	0.153918	0.102	0.049	7.05e-09		SCPEP1	4e-47	0.28628	0.35	0.132	9.11e-43
NTAN1	2.09e-30	0.219778	0.22	0.081	4.76e-26		DNM2	3.48e-46	0.350089	0.436	0.18	7.92e-42		ITGB4	1.44632e-13	0.223869	0.105	0.04	3.28936e-09		NQO2	8.09549e-56	0.360353	0.383	0.11	1.84116e-51		PDIA6	1.66e-16	0.15363	0.442	0.321	3.78e-12		COL1A2	8.13e-29	0.285986	0.254	0.104	1.85e-24
RHBDF2	1.01e-26	0.219371	0.228	0.093	2.29e-22		GGT5	4.4e-29	0.35	0.204	0.067	1e-24		RALB	1.57122e-32	0.223806	0.206	0.065	3.57343e-28		GLMP	2.22972e-54	0.359816	0.3	0.066	5.07106e-50		TPD52L2	8.58e-27	0.153607	0.266	0.142	1.95e-22		SDCBP	1.85e-26	0.285882	0.749	0.509	4.22e-22
NUCB1	2.01e-29	0.219241	0.378	0.196	4.57e-25		CH25H	1.76e-20	0.348061	0.239	0.11	4e-16		KDELR2	1.15009e-20	0.22347	0.425	0.268	2.61564e-16		ARAP1	1.43794e-44	0.359492	0.297	0.08	3.27032e-40		RDX	1.61e-22	0.153513	0.228	0.122	3.66e-18		KLF10	4.92e-37	0.285705	0.376	0.167	1.12e-32
ADAMTSL4	1.56e-27	0.219141	0.116	0.02	3.56e-23		HTRA1	1.43e-27	0.347879	0.243	0.096	3.26e-23		PSMC1	5.43814e-30	0.223455	0.324	0.154	1.2368e-25		ADAMTSL4	7.68055e-51	0.358981	0.197	0.02	1.74679e-46		TBXAS1	7.01e-18	0.153092	0.164	0.084	1.59e-13		RBKS	2.03e-29	0.285355	0.193	0.065	4.61e-25
AMPD2	5.46e-24	0.219108	0.178	0.066	1.24e-19		NPL	1.94e-44	0.347032	0.171	0.021	4.42e-40		MYL6	2.16808e-26	0.223363	0.92	0.834	4.93087e-22		TMEM14C	8.33984e-39	0.358238	0.46	0.209	1.89673e-34		PROCR	5.25e-28	0.152954	0.156	0.06	1.2e-23		PLIN3	2.3e-37	0.284496	0.354	0.154	5.23e-33
PSMA4	7.44e-29	0.219093	0.467	0.264	1.69e-24		SERPINB9	3.29e-28	0.346764	0.519	0.3	7.48e-24		TPD52L2	5.45475e-34	0.223021	0.266	0.103	1.24057e-29		RNASEK	6.28637e-26	0.357211	0.831	0.6	1.42971e-21		MFGE8	1.77e-20	0.152814	0.195	0.101	4.03e-16		APP	1.49e-32	0.284097	0.425	0.214	3.4e-28
CFH	2.71e-24	0.217966	0.197	0.078	6.17e-20		SDCCAG8	5.73e-51	0.346593	0.319	0.097	1.3e-46		SERPINB6	4.6462e-37	0.222834	0.325	0.133	1.05668e-32		OS9	2.10179e-44	0.35639	0.492	0.205	4.7801e-40		PABPC4	1.95e-19	0.151882	0.362	0.235	4.43e-15		FKBP15	4.01e-43	0.284078	0.277	0.094	9.13e-39
FOXO3	1.46e-27	0.217647	0.247	0.105	3.33e-23		BMP2K	3.12e-47	0.345951	0.297	0.089	7.09e-43		RAB10	1.5217e-30	0.22264	0.42	0.224	3.46081e-26		SPG21	6.05368e-45	0.356121	0.45	0.174	1.37679e-40		IGF2BP2	1.27e-21	0.151417	0.127	0.051	2.89e-17		LILRA6	1.92e-42	0.28387	0.168	0.035	4.38e-38
ZNF385A	5.8e-27	0.217067	0.121	0.024	1.32e-22		APOBR	8.58e-33	0.345354	0.18	0.044	1.95e-28		TXNDC12	4.23149e-30	0.222597	0.278	0.117	9.62368e-26		BSG	1.94793e-33	0.356072	0.483	0.239	4.43018e-29		LPCAT4	2.6e-11	0.151364	0.16	0.099	5.92e-07		UBE2D1	7.37e-37	0.283809	0.352	0.153	1.68e-32
TPD52L2	4.34e-32	0.217035	0.257	0.103	9.86e-28		IFIT1	4.47e-22	0.345203	0.374	0.203	1.02e-17		ATP5PD	6.29735e-26	0.222531	0.565	0.357	1.43221e-21		CSTA	3.95291e-62	0.355518	0.301	0.053	8.99009e-58		ADAMTS2	2.61e-10	0.151265	0.109	0.061	5.93e-06		MPHOSPH6	6.94e-48	0.283696	0.329	0.119	1.58e-43
AP5B1	2.47e-27	0.21642	0.142	0.036	5.61e-23		CKAP4	4.15e-33	0.345014	0.235	0.082	9.45e-29		DAPK1	3.66374e-31	0.221863	0.163	0.04	8.33245e-27		DNM2	9.23339e-43	0.355414	0.456	0.18	2.09995e-38		S100A13	4.66e-21	0.151243	0.272	0.159	1.06e-16		UBC	1.33e-20	0.283438	0.93	0.809	3.02e-16
RCN1	4.28e-24	0.216276	0.24	0.109	9.73e-20		HES1	4.41e-43	0.34384	0.225	0.053	1e-38		FOXO3	4.63339e-29	0.221487	0.255	0.105	1.05377e-24		TAGLN	6.61565e-44	0.354492	0.29	0.079	1.5046e-39		LACTB	1.19e-22	0.151089	0.277	0.158	2.7e-18		NCOA4	1.42e-39	0.283312	0.445	0.212	3.22e-35
NDUFB1	2.81e-22	0.215954	0.488	0.305	6.39e-18		SFT2D1	2.33e-50	0.343204	0.427	0.17	5.3e-46		SIPA1L2	5.41748e-22	0.220941	0.101	0.021	1.2321e-17		IRAK1	1.35028e-53	0.354399	0.393	0.118	3.07095e-49		HSP90AA1	6.12e-13	0.150614	0.835	0.753	1.39e-08		KRT18	1.88e-24	0.283145	0.182	0.068	4.27e-20
PHACTR1	2.7e-16	0.215578	0.152	0.067	6.15e-12		BGN	2.84e-19	0.342819	0.154	0.056	6.46e-15		TACSTD2	1.36222e-09	0.220487	0.104	0.05	3.09811e-05		NR4A3	4.18405e-30	0.354366	0.477	0.24	9.51578e-26		VKORC1	1.69e-20	0.150595	0.391	0.26	3.83e-16		SDC2	5.28e-26	0.283078	0.171	0.06	1.2e-21
BMP2K	2.6e-26	0.21494	0.22	0.089	5.91e-22		MAP2K1	2.97e-45	0.342371	0.355	0.128	6.75e-41		DBNL	2.86677e-30	0.220391	0.329	0.154	6.5199e-26		PLXNC1	1.67135e-38	0.354361	0.213	0.046	3.80115e-34		RCN3	7.37e-17	0.150208	0.148	0.074	1.68e-12		ATP6V0A1	6.15e-28	0.282935	0.22	0.086	1.4e-23
RENBP	8.65e-26	0.214281	0.126	0.028	1.97e-21		BLOC1S1	1.21e-38	0.34144	0.661	0.378	2.75e-34		ADAMTSL4	3.14395e-29	0.220324	0.122	0.02	7.15029e-25		FLVCR2	3.1304e-35	0.35397	0.149	0.019	7.11946e-31		AC007952.4	1.26e-12	0.14967	0.133	0.073	2.87e-08		NAPA	4.91e-34	0.282735	0.603	0.35	1.12e-29
LACC1	8.82e-26	0.214122	0.12	0.026	2.01e-21		FERMT3	3.48e-29	0.341326	0.326	0.153	7.93e-25		NR4A3	4.16934e-16	0.219158	0.375	0.24	9.48233e-12		NPL	2.51133e-47	0.353753	0.189	0.021	5.71152e-43		SIPA1L2	9.82e-17	0.149331	0.101	0.042	2.23e-12		BGN	3.17e-18	0.282537	0.176	0.076	7.22e-14
ARPC2	3.5e-18	0.214112	0.808	0.65	7.95e-14		FGD2	2.11e-34	0.341091	0.239	0.077	4.79e-30		PLIN3	1.46286e-29	0.219092	0.275	0.118	3.32698e-25		KDELR1	1.4476e-33	0.353726	0.479	0.235	3.29227e-29		CASP4	1.54e-21	0.149136	0.334	0.205	3.51e-17		ARF3	4.88e-38	0.282519	0.438	0.211	1.11e-33
RRAD	9.85e-15	0.214105	0.122	0.049	2.24e-10		CLTA	4.68e-45	0.340794	0.553	0.274	1.06e-40		RNF149	2.77795e-21	0.218901	0.596	0.4	6.31788e-17		ACOT9	1.37893e-45	0.353311	0.438	0.164	3.1361e-41		TRIP6	1.21e-26	0.1489	0.196	0.092	2.76e-22		CLIC4	1.37e-40	0.280369	0.364	0.153	3.12e-36
CH25H	1.26e-11	0.214013	0.192	0.11	2.86e-07		APP	2.04e-36	0.340619	0.385	0.171	4.63e-32		ARPC2	2.40543e-18	0.218497	0.81	0.65	5.47068e-14		AMPD2	9.31508e-41	0.353169	0.257	0.066	2.11853e-36		TMX1	1.49e-19	0.148745	0.311	0.195	3.4e-15		MYOF	2.51e-46	0.280328	0.3	0.104	5.71e-42
STAT2	1.34e-33	0.213881	0.474	0.256	3.04e-29		TET2	1.27e-37	0.340414	0.266	0.087	2.89e-33		MANBA	1.28316e-26	0.217768	0.262	0.115	2.91829e-22		EIF4G1	3.95541e-26	0.352634	0.415	0.217	8.9958e-22		PRKDC	1.3e-14	0.148603	0.323	0.222	2.96e-10		EPSTI1	2.02e-31	0.280324	0.691	0.439	4.6e-27
DNM2	1.02e-28	0.21383	0.358	0.18	2.31e-24		DOK3	3.71e-36	0.340396	0.17	0.033	8.44e-32		ACSL4	1.05179e-32	0.217065	0.291	0.122	2.3921e-28		HSD3B7	1.56778e-44	0.351777	0.184	0.023	3.56559e-40		PFN1	2.04e-20	0.148312	0.912	0.843	4.63e-16		EGFR	2.33e-37	0.279287	0.167	0.041	5.31e-33
PHLDA2	6.56e-36	0.212464	0.307	0.128	1.49e-31		CLCA2	5.94e-27	0.340336	0.118	0.019	1.35e-22		RHBDF2	1.1775e-27	0.216526	0.234	0.093	2.67798e-23		CISD2	8.24047e-41	0.351088	0.455	0.19	1.87413e-36		RBP1	4.15e-16	0.148257	0.17	0.093	9.43e-12		TMEM30A	5.24e-42	0.27917	0.423	0.192	1.19e-37
DDAH2	1.54e-29	0.212268	0.262	0.112	3.5e-25		SIPA1L2	4.03e-37	0.340269	0.149	0.021	9.18e-33		ARPC1B	5.91394e-23	0.216478	0.668	0.458	1.34501e-18		CD59	3.38335e-41	0.350417	0.496	0.224	7.69476e-37		VMA21	1.8e-25	0.147984	0.302	0.17	4.1e-21		ADAMTSL4	4e-47	0.278957	0.197	0.044	9.09e-43
ERP44	1.6e-32	0.212065	0.313	0.137	3.64e-28		FKBP15	7.54e-52	0.339821	0.266	0.062	1.72e-47		BLOC1S1	1.80471e-24	0.216025	0.592	0.378	4.10446e-20		PRSS23	2.50299e-24	0.349402	0.221	0.078	5.69254e-20		MYO1G	2.03e-12	0.147967	0.283	0.194	4.62e-08		IL18BP	1.11e-30	0.278717	0.263	0.108	2.52e-26
M6PR	1.07e-26	0.211596	0.368	0.198	2.43e-22		OAZ2	1.07e-48	0.337319	0.305	0.094	2.43e-44		AP5B1	2.12107e-27	0.215633	0.144	0.036	4.82394e-23		ARHGAP31	4.55612e-35	0.349166	0.223	0.057	1.0362e-30		PPP1R14B	3.57e-13	0.147786	0.382	0.281	8.13e-09		LAT2	1.39e-28	0.278206	0.246	0.101	3.17e-24
DPYSL2	7.5e-24	0.211447	0.203	0.084	1.71e-19		FLVCR2	4.38e-37	0.33703	0.147	0.019	9.97e-33		NME2	1.19706e-17	0.215282	0.653	0.511	2.72246e-13		UBE2D1	4.98949e-43	0.347601	0.352	0.115	1.13476e-38		RPN2	2.18e-14	0.147784	0.461	0.338	4.95e-10		TFPT	2.14e-38	0.27802	0.287	0.109	4.86e-34
TKT	5.09e-31	0.211084	0.316	0.147	1.16e-26		HK3	9.99e-37	0.336871	0.147	0.019	2.27e-32		PSMA4	2.91981e-29	0.214876	0.472	0.264	6.64053e-25		SLC25A24	9.21874e-49	0.346701	0.376	0.117	2.09662e-44		FOXO3	2.15e-22	0.147449	0.255	0.142	4.89e-18		PKP1	3.66e-32	0.277885	0.133	0.029	8.33e-28
GCH1	3.03e-25	0.210785	0.242	0.104	6.88e-21		OS9	4.04e-47	0.336222	0.466	0.205	9.19e-43		SRGN	1.85429e-07	0.214763	0.794	0.729	0.00421722		SERPINE2	1.0481e-32	0.34648	0.172	0.034	2.3837e-28		JUP	5.88e-17	0.147449	0.172	0.093	1.34e-12		PSMB2	2.79e-25	0.277728	0.552	0.354	6.33e-21
SERPINB6	2.98e-35	0.210443	0.315	0.133	6.78e-31		CAPZA2	1.67e-51	0.335962	0.51	0.225	3.81e-47		TRAF1	1.22835e-16	0.214717	0.219	0.113	2.79363e-12		SASH1	1.91571e-36	0.346057	0.208	0.048	4.3569e-32		AKR1B1	5.4e-21	0.147058	0.294	0.176	1.23e-16		PACSIN2	1.58e-39	0.277256	0.311	0.121	3.59e-35
RAB10	5.71e-29	0.210439	0.411	0.224	1.3e-24		ARF3	6.75e-54	0.335533	0.426	0.159	1.54e-49		PSMB2	2.29328e-23	0.214379	0.482	0.3	5.21561e-19		GNPDA1	2.54386e-47	0.345671	0.26	0.056	5.7855e-43		CNN3	6.36e-15	0.146988	0.209	0.125	1.45e-10		STXBP2	2.38e-26	0.277075	0.42	0.228	5.4e-22
RBPJ	1.07e-29	0.210138	0.432	0.238	2.42e-25		SERPINB6	1.06e-56	0.335518	0.399	0.133	2.41e-52		MIR155HG	6.70368e-12	0.213499	0.209	0.124	1.52462e-07		AP5B1	1.11329e-45	0.34534	0.216	0.036	2.53195e-41		ARPC2	6.44e-13	0.146949	0.81	0.703	1.46e-08		SLC2A1	3.64e-24	0.276984	0.184	0.07	8.27e-20
TXNDC12	4.12e-28	0.208854	0.268	0.117	9.36e-24		PSMA4	6.57e-43	0.334839	0.538	0.264	1.49e-38		PHACTR1	7.67186e-16	0.213483	0.152	0.067	1.74481e-11		FOXO3	5.06318e-40	0.345259	0.323	0.105	1.15152e-35		RALGDS	2.02e-16	0.146943	0.321	0.209	4.59e-12		TUBB6	7.34e-41	0.276771	0.304	0.116	1.67e-36
AKR1A1	6.8e-31	0.208627	0.403	0.21	1.55e-26		LACC1	8.57e-43	0.334123	0.174	0.026	1.95e-38		NTAN1	2.63628e-31	0.213472	0.226	0.081	5.9957e-27		GGT5	2.78613e-27	0.344347	0.212	0.067	6.3365e-23		UBC	1.73e-09	0.146935	0.88	0.809	3.94e-05		NIBAN2	2.27e-46	0.276596	0.327	0.121	5.16e-42
AHR	7.57e-28	0.208328	0.35	0.177	1.72e-23		RNF181	4.01e-47	0.334123	0.571	0.275	9.13e-43		ERP44	3.29038e-33	0.213053	0.319	0.137	7.48331e-29		SLC11A2	4.12927e-37	0.34411	0.258	0.074	9.39119e-33		TMED10	2.13e-15	0.146713	0.465	0.345	4.85e-11		CSTB	2.21e-32	0.276305	0.737	0.492	5.02e-28
KDELR1	1.14e-24	0.207386	0.403	0.235	2.6e-20		VPS35	1.15e-46	0.333749	0.41	0.165	2.61e-42		GCH1	7.63381e-26	0.21288	0.246	0.104	1.73616e-21		JAG1	2.06099e-37	0.343847	0.247	0.067	4.6873e-33		CD81	2.27e-09	0.146267	0.673	0.577	5.17e-05		SLIRP	5.64e-31	0.276188	0.559	0.339	1.28e-26
PLEKHM2	4.72e-28	0.20695	0.304	0.144	1.07e-23		LILRA2	3.58e-33	0.333669	0.129	0.016	8.13e-29		JAG1	2.82746e-24	0.212154	0.182	0.067	6.43049e-20		TXNDC12	5.51615e-39	0.343052	0.34	0.117	1.25454e-34		SFT2D1	3.93e-26	0.145902	0.355	0.211	8.95e-22		CCT5	1.14e-25	0.275893	0.442	0.256	2.58e-21
ADPGK	3.47e-27	0.206601	0.31	0.15	7.89e-23		PSMA6	7.58e-40	0.333554	0.682	0.407	1.72e-35		VMA21	2.65568e-31	0.211838	0.302	0.132	6.03981e-27		APOBR	4.94919e-33	0.34284	0.194	0.044	1.12559e-28		BST2	7.39e-13	0.14589	0.646	0.512	1.68e-08		RGS2	5.23e-18	0.275682	0.424	0.261	1.19e-13
PERP	2.85e-05	0.206241	0.199	0.149	0.648419		SUMO3	1.72e-44	0.333517	0.461	0.202	3.92e-40		SFT2D1	7.44483e-32	0.211828	0.355	0.17	1.69318e-27		RENBP	1.32509e-42	0.342269	0.192	0.028	3.01365e-38		PSMC1	2.03e-21	0.145825	0.324	0.202	4.61e-17		NPL	3.32e-44	0.275489	0.189	0.043	7.54e-40
SFT2D1	1.02e-29	0.206194	0.343	0.17	2.32e-25		CTHRC1	2.35e-11	0.333437	0.142	0.07	5.35e-07		TMBIM1	5.30385e-29	0.211528	0.297	0.135	1.20625e-24		ACSL3	4.90497e-50	0.342069	0.373	0.115	1.11554e-45		MYOF	3.51e-30	0.145267	0.224	0.104	7.98e-26		SYNGR2	2.14e-30	0.275396	0.544	0.315	4.87e-26
VMA21	3.3e-29	0.205347	0.291	0.132	7.5e-25		AP1B1	3.3e-55	0.333357	0.33	0.094	7.51e-51		BMP2K	1.8017e-26	0.211185	0.223	0.089	4.09761e-22		LAT2	2.8769e-36	0.342064	0.246	0.067	6.54293e-32		PCLAF	2.27e-13	0.145247	0.128	0.067	5.16e-09		VMA21	1.31e-38	0.275014	0.384	0.17	2.97e-34
STARD3NL	4.63e-26	0.205224	0.231	0.096	1.05e-21		CLIC4	5.95e-46	0.33303	0.335	0.117	1.35e-41		MT-ND4	1.85656e-13	0.210765	0.97	0.937	4.22237e-09		IRAK2	5.21098e-37	0.341535	0.208	0.046	1.18513e-32		ITPRIPL2	2.46e-26	0.145173	0.193	0.088	5.6e-22		ARHGAP10	5.17e-48	0.274766	0.224	0.057	1.17e-43
ANO6	8.97e-29	0.205125	0.252	0.106	2.04e-24		SH3BP2	2.77e-46	0.332973	0.299	0.091	6.3e-42		ANO6	1.57653e-30	0.210571	0.261	0.106	3.58551e-26		IFIT1	4.19237e-24	0.341023	0.408	0.203	9.53472e-20		2022-03-01	1.34e-14	0.144863	0.181	0.104	3.05e-10		FLVCR2	7.78e-28	0.274414	0.149	0.044	1.77e-23
PLXNC1	1.3e-26	0.204964	0.156	0.046	2.96e-22		CD59	3.57e-46	0.332751	0.482	0.224	8.11e-42		RENBP	1.52479e-26	0.210255	0.129	0.028	3.46783e-22		GLA	3.56973e-38	0.340838	0.33	0.112	8.11864e-34		KLF7	4.25e-21	0.144796	0.17	0.081	9.66e-17		APOBR	1.18e-28	0.273099	0.194	0.068	2.68e-24
BLOC1S1	2.53e-23	0.204531	0.582	0.378	5.77e-19		CLN8	1e-35	0.332348	0.234	0.072	2.28e-31		IFITM2	1.28788e-14	0.209875	0.812	0.634	2.92902e-10		ANXA11	2.33469e-38	0.340794	0.502	0.227	5.30978e-34		ANO6	6.17e-24	0.144675	0.261	0.142	1.4e-19		RAP2B	3.09e-38	0.272983	0.322	0.13	7.03e-34
PSMB2	1.25e-22	0.204339	0.477	0.3	2.84e-18		TMBIM1	3.8e-47	0.332023	0.367	0.135	8.63e-43		SLC3A2	1.31725e-22	0.209496	0.48	0.297	2.99583e-18		TMBIM1	4.04822e-45	0.340763	0.388	0.135	9.20687e-41		CDKN1A	7.25e-15	0.144617	0.54	0.411	1.65e-10		DSG3	1.69e-40	0.272342	0.128	0.018	3.84e-36
UBE2E2	1.72e-32	0.203608	0.182	0.051	3.9e-28		DBNL	2.45e-47	0.331854	0.399	0.154	5.57e-43		CANX	1.48657e-25	0.208865	0.508	0.318	3.3809e-21		RHOU	1.09875e-32	0.340689	0.156	0.026	2.49888e-28		FKBP1A	2.69e-20	0.143979	0.61	0.466	6.12e-16		HSD3B7	2.93e-40	0.271849	0.184	0.046	6.66e-36
AGAP3	3.82e-29	0.203364	0.205	0.074	8.69e-25		IL6R	1.74e-37	0.331137	0.211	0.054	3.96e-33		RBPJ	2.09753e-30	0.208501	0.44	0.238	4.77042e-26		IER5	9.60866e-36	0.339676	0.521	0.246	2.1853e-31		TLR4	5.85e-17	0.143933	0.13	0.061	1.33e-12		MANBA	4.12e-33	0.271693	0.361	0.167	9.38e-29
PRKCD	1.69e-26	0.202931	0.176	0.058	3.85e-22		IL18	1.89e-46	0.330898	0.193	0.029	4.31e-42		AGAP3	1.56288e-31	0.208127	0.215	0.074	3.55447e-27		SLC16A3	4.66564e-38	0.339363	0.412	0.164	1.06111e-33		SMIM4	7.08e-25	0.143896	0.252	0.134	1.61e-20		FOXO3	5.68e-33	0.271221	0.323	0.142	1.29e-28
PFKFB3	4.32e-17	0.202874	0.41	0.264	9.83e-13		AP5B1	8.25e-44	0.329519	0.197	0.036	1.88e-39		LACC1	1.11545e-27	0.207094	0.127	0.026	2.53687e-23		FKBP15	7.85925e-49	0.33893	0.277	0.062	1.78743e-44		PIM3	4.53e-17	0.143521	0.488	0.346	1.03e-12		PPP1R18	4.69e-29	0.27112	0.457	0.249	1.07e-24
PSMA6	5.83e-23	0.202614	0.602	0.407	1.32e-18		HSD3B7	1.01e-41	0.329098	0.165	0.023	2.3e-37		SLC11A2	2.63058e-20	0.206928	0.178	0.074	5.98273e-16		VMA21	1.63373e-44	0.338868	0.384	0.132	3.7156e-40		FSTL3	7.62e-22	0.143281	0.139	0.059	1.73e-17		HK3	2.66e-31	0.271072	0.149	0.038	6.05e-27
KDELR2	1.86e-19	0.202494	0.419	0.268	4.24e-15		GNG10	4.53e-59	0.328464	0.48	0.186	1.03e-54		CSTB	4.4906e-23	0.206709	0.631	0.433	1.0213e-18		TMEM30A	6.27195e-51	0.338151	0.423	0.144	1.42643e-46		NEAT1	2.13e-15	0.143113	0.863	0.764	4.83e-11		SPARCL1	0.000488235	0.270912	0.125	0.086	1
APOBR	1.12e-15	0.202246	0.118	0.044	2.55e-11		SLC25A24	1.65e-53	0.327207	0.363	0.117	3.75e-49		VKORC1	7.83475e-26	0.206312	0.391	0.216	1.78186e-21		HES1	1.89043e-40	0.337334	0.233	0.053	4.2994e-36		ST13	2.32e-14	0.142885	0.415	0.3	5.28e-10		CD164	5.71e-27	0.270277	0.644	0.41	1.3e-22
ATP6V0E1	1.71e-19	0.201861	0.641	0.457	3.89e-15		GNB1	4.33e-41	0.326396	0.595	0.318	9.86e-37		PROCR	1.45398e-34	0.206167	0.156	0.031	3.30679e-30		STX4	3.86926e-40	0.336967	0.366	0.13	8.79987e-36		MYDGF	3.63e-21	0.142688	0.393	0.262	8.25e-17		EDEM1	1.02e-27	0.270231	0.324	0.153	2.33e-23
PLIN3	1.04e-27	0.201646	0.266	0.118	2.36e-23		SASH1	2.03e-38	0.326352	0.2	0.048	4.61e-34		APOBR	7.62852e-16	0.205247	0.12	0.044	1.73495e-11		CLIC4	1.24545e-46	0.336358	0.364	0.117	2.83253e-42		CKS1B	1.85e-14	0.142219	0.178	0.104	4.22e-10		MYO1F	5.51e-25	0.270222	0.272	0.126	1.25e-20
FERMT3	4.2e-15	0.20071	0.259	0.153	9.56e-11		RALB	1.93e-48	0.326219	0.261	0.065	4.4e-44		LYSMD2	1.17552e-27	0.205041	0.261	0.112	2.67349e-23		ADPGK	1.62545e-44	0.336204	0.414	0.15	3.69677e-40		LTBP1	2.15e-21	0.142186	0.131	0.054	4.9e-17		CLTA	6.58e-34	0.269618	0.582	0.339	1.5e-29
PSMD2	1.8e-21	0.20071	0.393	0.235	4.1e-17		FOXO3	2.9e-42	0.32614	0.307	0.105	6.6e-38		PRKCD	1.17741e-27	0.204943	0.181	0.058	2.67779e-23		SSR1	1.92102e-38	0.335945	0.466	0.203	4.36898e-34		MT1X	1.68e-14	0.142119	0.485	0.371	3.81e-10		TRIM29	1.72e-37	0.269593	0.139	0.026	3.92e-33
SASH1	3.94e-24	0.200466	0.15	0.048	8.97e-20		GPR34	2.36e-34	0.325181	0.15	0.025	5.38e-30		TUBB6	8.39979e-29	0.204903	0.228	0.088	1.91036e-24		ITGAM	8.93072e-33	0.335395	0.143	0.019	2.03111e-28		CCT5	7.35e-17	0.142117	0.372	0.256	1.67e-12		ERO1A	3.63e-25	0.269083	0.359	0.19	8.25e-21
TPRA1	8.2e-24	0.200037	0.207	0.085	1.86e-19		AHR	2.48e-48	0.324736	0.438	0.177	5.64e-44		SCPEP1	1.60819e-31	0.204726	0.254	0.099	3.65751e-27		SCPEP1	2.01171e-51	0.335099	0.35	0.099	4.57524e-47		TFPT	2.44e-19	0.142084	0.201	0.109	5.54e-15		GNA13	1.19e-26	0.269082	0.492	0.284	2.7e-22
WNT5A	1.56e-16	0.199868	0.118	0.042	3.54e-12		FBP1	8.92e-30	0.324669	0.153	0.034	2.03e-25		MAP2K1	2.9655e-27	0.204548	0.284	0.128	6.74444e-23		DEK	4.09029e-37	0.334878	0.63	0.326	9.30256e-33		NUTF2	1.28e-19	0.141858	0.335	0.217	2.91e-15		ARNTL2	4.37e-36	0.268849	0.216	0.071	9.94e-32
FILIP1L	7.01e-12	0.199858	0.133	0.065	1.59e-07		SIPA1L1	4.15e-42	0.324561	0.381	0.152	9.44e-38		FKBP1A	1.12556e-32	0.204114	0.61	0.384	2.55986e-28		ARPC1B	3.90454e-33	0.334707	0.765	0.458	8.88009e-29		TCIM	4.81e-08	0.141524	0.117	0.072	0.00109301		PLEK2	6.69e-37	0.268812	0.155	0.035	1.52e-32
CPVL	7.53e-31	0.199086	0.154	0.036	1.71e-26		ETV5	5.52e-52	0.323436	0.213	0.033	1.26e-47		CD164	2.72368e-24	0.204097	0.559	0.355	6.19446e-20		PLEKHM2	1.53442e-44	0.334616	0.404	0.144	3.48974e-40		AGAP3	4.97e-27	0.141523	0.215	0.103	1.13e-22		GRASP	3.66e-22	0.268717	0.4	0.224	8.33e-18
OLFML3	2.45e-18	0.198698	0.113	0.035	5.56e-14		AKR1A1	1.4e-46	0.323058	0.474	0.21	3.19e-42		SUMO3	4.12848e-27	0.204042	0.384	0.202	9.38941e-23		MYO1F	1.23697e-31	0.334465	0.272	0.091	2.81324e-27		TMEM33	1.11e-21	0.141225	0.247	0.139	2.53e-17		WDR45B	3.34e-32	0.268027	0.345	0.156	7.59e-28
CANX	1.08e-25	0.198306	0.505	0.318	2.46e-21		TMEM51	3.49e-51	0.321634	0.209	0.031	7.93e-47		PSMA6	3.42446e-23	0.203886	0.607	0.407	7.78825e-19		MSRB2	3.69237e-55	0.33444	0.308	0.069	8.39756e-51		CYC1	9.99e-18	0.141193	0.302	0.195	2.27e-13		PSME2	7.69e-22	0.267818	0.776	0.593	1.75e-17
CARD16	3.53e-19	0.19791	0.406	0.244	8.02e-15		MOB3B	1.16e-48	0.321603	0.2	0.03	2.65e-44		PIM3	1.06482e-22	0.203866	0.488	0.298	2.42173e-18		TLNRD1	2.89267e-49	0.334173	0.297	0.071	6.5788e-45		MRPL52	1.26e-19	0.140995	0.472	0.334	2.87e-15		FAM20A	4.69e-28	0.267442	0.191	0.068	1.07e-23
JAG1	6.95e-22	0.197814	0.172	0.067	1.58e-17		PLIN3	1.24e-45	0.321574	0.337	0.118	2.83e-41		STAT2	5.23159e-33	0.203754	0.478	0.256	1.18982e-28		FBP1	6.21883e-30	0.333946	0.163	0.034	1.41435e-25		MPHOSPH6	4.2e-27	0.140755	0.237	0.119	9.55e-23		UQCRC1	2.21e-37	0.267143	0.505	0.266	5.04e-33
SERINC2	1.84e-21	0.197696	0.164	0.063	4.18e-17		LYSMD2	7.44e-44	0.319235	0.326	0.112	1.69e-39		PLEKHM2	1.02343e-28	0.20348	0.31	0.144	2.32758e-24		PSMB2	1.40483e-30	0.333931	0.552	0.3	3.19501e-26		EIF2S2	9.9e-12	0.140725	0.442	0.337	2.25e-07		PLXNC1	1.1e-25	0.267126	0.213	0.086	2.5e-21
GNPDA1	3.63e-24	0.197674	0.164	0.056	8.25e-20		SERPINB5	4.26e-22	0.319174	0.14	0.041	9.68e-18		NFIC	3.86198e-28	0.202867	0.254	0.105	8.7833e-24		SIPA1L2	1.14873e-37	0.333001	0.16	0.021	2.61255e-33		PLOD2	4.82e-20	0.140312	0.15	0.07	1.1e-15		IFIT1	2.53e-21	0.266685	0.408	0.234	5.74e-17
ATP6V1E1	2.17e-31	0.197644	0.308	0.139	4.95e-27		EVA1B	6.21e-49	0.319077	0.282	0.076	1.41e-44		PALLD	1.23253e-20	0.202814	0.187	0.08	2.80313e-16		ARF3	8.70116e-48	0.332742	0.438	0.159	1.97891e-43		ADAMTSL4	1.01e-23	0.1403	0.122	0.044	2.3e-19		ZNF385A	4.52e-42	0.266532	0.191	0.047	1.03e-37
IRAK2	7.09e-21	0.19763	0.138	0.046	1.61e-16		ABCD1	8.8e-37	0.318518	0.172	0.033	2e-32		WNT5A	4.77601e-17	0.202606	0.121	0.042	1.08621e-12		RBKS	2.07166e-31	0.332584	0.193	0.046	4.71157e-27		VASP	7.26e-21	0.140258	0.381	0.247	1.65e-16		PIK3R5	2.87e-20	0.265986	0.25	0.123	6.54e-16
VKORC1	1.94e-24	0.197343	0.382	0.216	4.41e-20		DBNDD2	1.51e-58	0.318407	0.362	0.108	3.43e-54		DPYSL2	6.11103e-24	0.202424	0.206	0.084	1.38983e-19		SLC37A2	5.84105e-53	0.332052	0.182	0.011	1.32843e-48		SEPTIN10	8.55e-23	0.140226	0.168	0.077	1.95e-18		LPCAT2	6.92e-52	0.265949	0.264	0.073	1.57e-47
FKBP1A	1.7e-33	0.197316	0.61	0.384	3.86e-29		GNPDA1	1.48e-43	0.318379	0.232	0.056	3.36e-39		CCND1	8.944e-20	0.202227	0.197	0.089	2.03413e-15		STXBP2	1.64094e-32	0.331139	0.42	0.186	3.73198e-28		ABHD12	2.69e-25	0.140187	0.292	0.163	6.13e-21		LDLR	5.58e-32	0.265879	0.328	0.148	1.27e-27
CLN8	3.04e-19	0.197284	0.171	0.072	6.92e-15		RGS19	5.17e-45	0.318172	0.294	0.09	1.17e-40		DNM2	5.38806e-28	0.202033	0.36	0.18	1.22541e-23		RALB	2.62992e-47	0.331092	0.277	0.065	5.98122e-43		RAB2A	1.45e-15	0.140173	0.435	0.316	3.3e-11		IGFLR1	1.06e-31	0.265776	0.359	0.168	2.41e-27
PIM3	1.03e-21	0.197195	0.479	0.298	2.35e-17		RILP	6.62e-41	0.318035	0.195	0.04	1.5e-36		PFKFB3	1.37759e-16	0.201443	0.41	0.264	3.13305e-12		ZNF385A	1.02544e-45	0.330609	0.191	0.024	2.33217e-41		ADH5	5.34e-20	0.139904	0.312	0.194	1.21e-15		OS9	3.25e-33	0.265209	0.492	0.26	7.39e-29
PROCR	1.55e-32	0.196188	0.149	0.031	3.53e-28		BSG	4.29e-36	0.31794	0.467	0.239	9.77e-32		COL7A1	4.22311e-20	0.201405	0.147	0.053	9.60461e-16		TMEM51	5.22751e-51	0.330549	0.222	0.031	1.18889e-46		MRPL51	2.82e-21	0.139834	0.432	0.294	6.4e-17		BLOC1S1	3.63e-26	0.265037	0.676	0.433	8.25e-22
ANGPTL4	4.2e-16	0.195824	0.108	0.036	9.56e-12		TP63	7.85e-29	0.317612	0.12	0.018	1.79e-24		UBE2E2	1.35519e-33	0.201185	0.187	0.051	3.08211e-29		HDGF	2.71338e-35	0.329993	0.383	0.159	6.17103e-31		CRISPLD2	2.72e-15	0.139753	0.143	0.075	6.19e-11		UBE2C	1.32e-23	0.264967	0.142	0.045	3e-19
NPL	3.64e-23	0.195639	0.105	0.021	8.27e-19		SCPEP1	2.58e-49	0.31638	0.319	0.099	5.87e-45		NDUFB1	5.24071e-21	0.200968	0.488	0.305	1.1919e-16		CDC42EP2	9.6856e-37	0.329643	0.191	0.038	2.2028e-32		RND3	3.29e-18	0.139344	0.175	0.092	7.49e-14		PRSS23	3.9e-23	0.26494	0.221	0.096	8.87e-19
CHMP5	4.6e-25	0.19488	0.474	0.281	1.05e-20		SESN2	3.06e-37	0.315018	0.226	0.062	6.95e-33		CSTA	3.65719e-29	0.200945	0.178	0.053	8.31756e-25		RPS27L	1.4259e-36	0.329487	0.697	0.396	3.24292e-32		UQCRC1	7.04e-25	0.139226	0.414	0.266	1.6e-20		TNFAIP3	3.62e-19	0.264501	0.875	0.728	8.23e-15
CRISPLD2	4.29e-21	0.19424	0.14	0.047	9.76e-17		C1R	3.1e-25	0.314924	0.225	0.088	7.05e-21		FERMT3	1.94552e-14	0.200864	0.258	0.153	4.4247e-10		IGF2BP2	9.466e-43	0.328664	0.203	0.035	2.15285e-38		MICOS10	6.26e-17	0.139067	0.569	0.431	1.42e-12		FBP1	9.56e-26	0.264437	0.163	0.055	2.17e-21
LGALS9	9.14e-22	0.194204	0.331	0.181	2.08e-17		DDAH2	1.57e-45	0.314515	0.327	0.112	3.57e-41		CRISPLD2	1.22421e-21	0.200268	0.143	0.047	2.78423e-17		FERMT3	2.06257e-25	0.328422	0.335	0.153	4.6909e-21		YIF1B	4e-23	0.138488	0.255	0.142	9.11e-19		VMP1	2.49e-27	0.264204	0.613	0.374	5.66e-23
C4orf48	3.67e-22	0.194035	0.553	0.359	8.36e-18		CAV2	3.17e-23	0.31307	0.213	0.087	7.2e-19		PLXNC1	5.88537e-26	0.199774	0.155	0.046	1.33851e-21		RNF181	5.91615e-42	0.328293	0.593	0.275	1.34551e-37		MCOLN1	1.04e-24	0.138042	0.196	0.093	2.36e-20		PICALM	6.67e-42	0.263612	0.493	0.236	1.52e-37
IRAK1	1.21e-29	0.194011	0.274	0.118	2.74e-25		TMEM14C	7.02e-38	0.312904	0.429	0.209	1.6e-33		GNB1	2.89545e-25	0.199768	0.519	0.318	6.58511e-21		UBC	1.81624e-23	0.327681	0.93	0.781	4.13067e-19		ANXA11	2.83e-18	0.137986	0.425	0.288	6.43e-14		TLNRD1	3.07e-43	0.263566	0.297	0.104	6.98e-39
MYO1E	4.01e-24	0.193765	0.226	0.099	9.11e-20		FLNA	1.68e-34	0.312771	0.615	0.359	3.81e-30		AKR1A1	1.44475e-31	0.19958	0.41	0.21	3.28579e-27		DPYSL2	1.21534e-32	0.327102	0.259	0.084	2.76404e-28		GCH1	5.77e-18	0.137976	0.246	0.145	1.31e-13		CREB5	8e-38	0.263437	0.255	0.089	1.82e-33
STX4	3.09e-26	0.193521	0.279	0.13	7.02e-22		NQO2	1.98e-52	0.312472	0.346	0.11	4.51e-48		YWHAE	2.84561e-24	0.199327	0.511	0.313	6.47177e-20		NIBAN2	8.9502e-55	0.327062	0.327	0.08	2.03554e-50		GGT5	1.94e-13	0.137853	0.173	0.102	4.42e-09		AC092803.1	1.11e-32	0.26341	0.131	0.028	2.51e-28
SCPEP1	2.85e-29	0.193164	0.244	0.099	6.49e-25		CFLAR	6.54e-24	0.311953	0.712	0.482	1.49e-19		RPN2	3.21853e-19	0.199304	0.461	0.291	7.31991e-15		VMP1	5.38793e-36	0.326455	0.613	0.314	1.22538e-31		MFAP2	1.31e-15	0.137609	0.145	0.075	2.98e-11		IRAK1	3.6e-45	0.263286	0.393	0.161	8.2e-41
IRS2	4.8e-23	0.193138	0.211	0.09	1.09e-18		CMIP	9.71e-46	0.311585	0.442	0.185	2.21e-41		MICOS10	6.71163e-21	0.198517	0.569	0.383	1.52643e-16		PIK3R5	2.92177e-27	0.326265	0.25	0.088	6.64498e-23		ATP5PB	1.79e-15	0.137302	0.463	0.333	4.08e-11		MFSD12	4.2e-47	0.263162	0.38	0.153	9.55e-43
ATP6V1C1	1.42e-28	0.19308	0.229	0.09	3.23e-24		TKT	5.94e-47	0.311003	0.383	0.147	1.35e-42		ARAP1	1.74027e-28	0.198515	0.218	0.08	3.9579e-24		HK3	1.01443e-34	0.326125	0.149	0.019	2.30712e-30		RHOBTB3	2.51e-15	0.13722	0.172	0.096	5.72e-11		C1R	2.84e-23	0.262484	0.247	0.112	6.46e-19
ATP6V0A1	1.37e-22	0.192888	0.155	0.053	3.13e-18		CISD2	5.18e-42	0.31009	0.429	0.19	1.18e-37		STARD3NL	4.83773e-27	0.198277	0.237	0.096	1.10024e-22		DBNL	1.62585e-44	0.325638	0.42	0.154	3.69768e-40		BNIP3L	8.14e-16	0.136756	0.322	0.214	1.85e-11		AP5B1	6.56e-35	0.262398	0.216	0.071	1.49e-30
TLNRD1	5.59e-27	0.192567	0.197	0.071	1.27e-22		TMEM30A	3.45e-52	0.309776	0.397	0.144	7.85e-48		DEK	1.44375e-26	0.198156	0.537	0.326	3.28351e-22		SUMO3	5.22958e-41	0.324878	0.482	0.202	1.18936e-36		PACSIN2	1.98e-21	0.136378	0.224	0.121	4.5e-17		SASH1	5.92e-27	0.262242	0.208	0.081	1.35e-22
MICOS10	8.73e-20	0.192326	0.561	0.383	1.99e-15		GPR132	6.16e-25	0.309766	0.306	0.144	1.4e-20		ATP6V1E1	4.62612e-32	0.197935	0.314	0.139	1.05212e-27		JUP	1.9187e-33	0.324511	0.247	0.074	4.3637e-29		NOTCH3	2.43e-10	0.136289	0.118	0.067	5.54e-06		CD59	1.29e-31	0.262081	0.496	0.282	2.93e-27
CD164	2.36e-23	0.19222	0.551	0.355	5.37e-19		MYL6	3.69e-42	0.309606	0.945	0.834	8.4e-38		RHOU	2.21832e-18	0.197733	0.1	0.026	5.04512e-14		PLIN3	1.08184e-42	0.324356	0.354	0.118	2.46042e-38		IGFLR1	1.52e-15	0.136229	0.266	0.168	3.45e-11		POSTN	1.82e-12	0.262043	0.106	0.044	4.14e-08
OS9	1.9e-27	0.191477	0.381	0.205	4.32e-23		MYOF	4.88e-53	0.30951	0.284	0.072	1.11e-48		AHR	2.03663e-27	0.197599	0.353	0.177	4.63191e-23		IL6R	1.45383e-36	0.323271	0.224	0.054	3.30645e-32		BAX	8.71e-22	0.135705	0.545	0.384	1.98e-17		SIPA1L2	2.97e-33	0.261391	0.16	0.042	6.76e-29
S100A8	3.33e-53	0.191475	0.371	0.141	7.58e-49		CFL1	1.86e-33	0.308941	0.926	0.783	4.23e-29		CPVL	5.94538e-32	0.197166	0.158	0.036	1.35216e-27		NNMT	6.04109e-25	0.323098	0.259	0.099	1.37393e-20		UBE2L6	6.05e-19	0.135655	0.497	0.351	1.38e-14		RNASEK	4.1e-17	0.260287	0.831	0.655	9.32e-13
FLNA	8.31e-20	0.191306	0.533	0.359	1.89e-15		VMA21	8.56e-47	0.308762	0.365	0.132	1.95e-42		CLN8	1.04849e-19	0.196551	0.174	0.072	2.38459e-15		EIF4A3	1.20474e-28	0.322601	0.521	0.264	2.73993e-24		APOBR	1.13e-10	0.135506	0.12	0.068	2.56e-06		HSP90AA1	4.05e-20	0.260082	0.881	0.753	9.2e-16
DYNLT1	2.13e-17	0.191228	0.626	0.451	4.84e-13		PLEKHM2	6.95e-44	0.308486	0.374	0.144	1.58e-39		KRT17	2.41847e-09	0.196517	0.227	0.151	5.50032e-05		CLCN7	9.28347e-43	0.322596	0.283	0.076	2.11134e-38		ERP44	2.08e-22	0.135409	0.319	0.19	4.73e-18		TMX1	4.27e-31	0.259709	0.388	0.195	9.7e-27
SLC3A2	6.05e-22	0.190909	0.476	0.297	1.38e-17		IRS2	1.13e-38	0.308256	0.275	0.09	2.57e-34		ADAMTS2	2.88484e-12	0.196481	0.109	0.046	6.56099e-08		PTGFRN	4.53741e-39	0.322483	0.199	0.038	1.03194e-34		LY86	9.8e-11	0.135388	0.12	0.067	2.23e-06		TGM2	3e-46	0.259656	0.295	0.1	6.83e-42
TUBB6	2.43e-26	0.190713	0.218	0.088	5.52e-22		ATP5PD	2.18e-36	0.307793	0.625	0.357	4.95e-32		FLNA	1.51234e-20	0.196169	0.54	0.359	3.43952e-16		MFSD12	5.3577e-55	0.322426	0.38	0.11	1.2185e-50		GPR137B	2.34e-15	0.13508	0.207	0.123	5.33e-11		AGFG1	2.83e-31	0.259532	0.373	0.18	6.43e-27
TET2	6.64e-21	0.189952	0.199	0.087	1.51e-16		CALD1	6.11e-20	0.307708	0.282	0.144	1.39e-15		SASH1	3.37906e-24	0.196102	0.151	0.048	7.68501e-20		NRIP1	1.21696e-40	0.322401	0.299	0.089	2.76773e-36		FAT1	4.59e-19	0.134983	0.136	0.062	1.04e-14		TMEM51	5.68e-45	0.258332	0.222	0.059	1.29e-40
RPN2	1.4e-18	0.189706	0.455	0.291	3.19e-14		ARPC2	8.55e-30	0.307335	0.853	0.65	1.95e-25		MESD	1.0038e-24	0.195956	0.368	0.201	2.28295e-20		PPIB	3.97386e-21	0.321451	0.725	0.52	9.03774e-17		MXRA5	6.04e-19	0.13471	0.12	0.05	1.37e-14		RPS27L	2.93e-27	0.258005	0.697	0.459	6.66e-23
UBE2D1	2.33e-25	0.189506	0.256	0.115	5.29e-21		MICAL1	1.03e-33	0.307213	0.295	0.115	2.34e-29		ATP6V0E1	4.42036e-19	0.195945	0.643	0.457	1.00532e-14		TKT	1.58324e-42	0.321091	0.396	0.147	3.60077e-38		SLC25A24	5.27e-23	0.134696	0.285	0.163	1.2e-18		PDIA6	9.89e-22	0.257678	0.502	0.321	2.25e-17
OAZ2	2.36e-28	0.18933	0.232	0.094	5.36e-24		PIK3R5	4.65e-29	0.306736	0.24	0.088	1.06e-24		OLFML3	1.57125e-19	0.195794	0.118	0.035	3.57348e-15		CDC20	3.84681e-27	0.321029	0.133	0.024	8.74879e-23		H3F3A	1.37e-07	0.134631	0.868	0.789	0.00312174		CD81	5.48e-19	0.257424	0.766	0.577	1.25e-14
SIPA1L1	5.49e-24	0.189329	0.302	0.152	1.25e-19		ZNF385A	3.57e-44	0.306482	0.176	0.024	8.12e-40		ITPRIPL2	1.60706e-32	0.195161	0.193	0.057	3.65493e-28		SRGN	5.21177e-13	0.320191	0.844	0.729	1.18531e-08		LDLR	1.23e-20	0.134577	0.257	0.148	2.79e-16		AGRN	5.96e-32	0.257377	0.253	0.101	1.36e-27
BID	1.53e-21	0.188779	0.247	0.121	3.49e-17		TLNRD1	3.17e-44	0.305733	0.261	0.071	7.22e-40		SLC37A2	1.11586e-28	0.195082	0.104	0.011	2.5378e-24		HCAR3	1.45022e-29	0.320124	0.115	0.011	3.29823e-25		FLNA	1.44e-15	0.134425	0.54	0.409	3.26e-11		CLCN7	8.16e-38	0.257054	0.283	0.106	1.86e-33
TMEM51	9.28e-29	0.188532	0.139	0.031	2.11e-24		PSMB3	3.29e-33	0.30536	0.688	0.434	7.48e-29		TLNRD1	2.31965e-28	0.193268	0.204	0.071	5.27558e-24		LY6K	1.10615e-29	0.319816	0.139	0.022	2.51571e-25		SLC16A3	1.22e-16	0.134354	0.332	0.217	2.78e-12		DKK1	3.26e-43	0.25684	0.114	0.011	7.42e-39
ABCD1	6.49e-20	0.188078	0.115	0.033	1.48e-15		SSR1	3.72e-39	0.305039	0.439	0.203	8.46e-35		NPL	2.43397e-24	0.193108	0.109	0.021	5.53557e-20		FSTL3	5.70276e-39	0.319739	0.202	0.04	1.29698e-34		CYSTM1	6.19e-29	0.133982	0.368	0.215	1.41e-24		RBP1	1.77e-27	0.256278	0.229	0.093	4.04e-23
CSTA	3.18e-27	0.187996	0.17	0.053	7.22e-23		TUBB6	2.08e-41	0.304871	0.277	0.088	4.74e-37		UBE2D1	1.70999e-26	0.193009	0.262	0.115	3.88903e-22		DOK3	6.37432e-32	0.319576	0.168	0.033	1.44971e-27		IER3IP1	9.61e-18	0.133876	0.349	0.231	2.19e-13		PSMD1	6.73e-31	0.256193	0.377	0.184	1.53e-26
TMBIM1	8.66e-26	0.187768	0.283	0.135	1.97e-21		CD164	5.47e-37	0.304519	0.626	0.355	1.24e-32		SSR1	3.0395e-24	0.192996	0.371	0.203	6.91273e-20		VIM	3.40386e-23	0.319454	0.899	0.683	7.74141e-19		MAP7D1	3.02e-21	0.133873	0.306	0.187	6.87e-17		SH3BP2	1e-34	0.255836	0.308	0.127	2.27e-30
KIAA0930	1.72e-28	0.187694	0.21	0.078	3.92e-24		PSMC1	2.41e-41	0.303274	0.375	0.154	5.48e-37		TPRA1	2.05805e-24	0.192716	0.211	0.085	4.68063e-20		TUBB6	3.04996e-43	0.319262	0.304	0.088	6.93653e-39		EDEM1	2.61e-17	0.133461	0.254	0.153	5.93e-13		GNPDA1	1.46e-41	0.255438	0.26	0.085	3.32e-37
PATL1	1.23e-24	0.187655	0.224	0.096	2.8e-20		PDGFB	5.02e-36	0.303059	0.156	0.025	1.14e-31		HAVCR2	3.01356e-21	0.192298	0.234	0.11	6.85375e-17		AGFG1	5.21379e-38	0.319137	0.373	0.141	1.18577e-33		ACOT9	2.64e-20	0.1334	0.337	0.211	6.01e-16		AL031590.1	5.65e-25	0.254951	0.109	0.026	1.29e-20
NQO2	1.85e-31	0.187498	0.268	0.11	4.21e-27		ERP44	3.73e-48	0.302006	0.381	0.137	8.48e-44		MYO1B	2.16581e-19	0.191425	0.179	0.077	4.92569e-15		SH3BP2	5.9819e-42	0.318879	0.308	0.091	1.36046e-37		CLTA	8.46e-19	0.133307	0.478	0.339	1.92e-14		SMIM3	1.3e-31	0.25489	0.345	0.158	2.97e-27
COX8A	5.16e-22	0.186487	0.725	0.552	1.17e-17		ANO6	3.52e-44	0.301875	0.316	0.106	8.02e-40		UBC	1.23509e-12	0.191178	0.88	0.781	2.80896e-08		BLOC1S1	7.20127e-32	0.318322	0.676	0.378	1.63778e-27		SLC43A3	6.47e-26	0.133273	0.227	0.114	1.47e-21		STX4	4.1e-30	0.254882	0.366	0.177	9.32e-26
CFLAR	2.68e-15	0.185879	0.657	0.482	6.09e-11		MPHOSPH6	6.68e-47	0.301777	0.304	0.095	1.52e-42		DYNLT1	3.43356e-17	0.191176	0.63	0.451	7.80895e-13		IRS2	4.86154e-39	0.318283	0.297	0.09	1.10566e-34		WNT5A	2.2e-12	0.133258	0.121	0.064	5e-08		GNG10	9.4e-43	0.254695	0.5	0.241	2.14e-38
TMBIM6	1.44e-15	0.185807	0.678	0.516	3.27e-11		ITGAM	7.21e-29	0.301462	0.124	0.019	1.64e-24		NOTCH3	4.49595e-14	0.1911	0.118	0.047	1.02251e-09		FAM20A	1.19022e-33	0.318265	0.191	0.042	2.70692e-29		GRASP	1.06e-09	0.133226	0.307	0.224	2.42e-05		H3F3A	4.29e-13	0.253966	0.912	0.789	9.76e-09
ITPRIPL2	1.56e-30	0.185582	0.185	0.057	3.54e-26		ACSL3	1.52e-47	0.301126	0.34	0.115	3.45e-43		PLOD1	6.52865e-29	0.190921	0.199	0.067	1.48481e-24		CD164	9.43416e-33	0.318091	0.644	0.355	2.14561e-28		PRKCD	9.72e-21	0.132938	0.181	0.09	2.21e-16		RENBP	1.09e-34	0.253663	0.192	0.057	2.47e-30
HAPLN3	1.35e-25	0.184986	0.234	0.099	3.08e-21		CSTA	3.26e-52	0.301069	0.253	0.053	7.41e-48		RAP2B	3.01836e-26	0.19082	0.242	0.102	6.86466e-22		MYOF	4.93717e-51	0.318069	0.3	0.072	1.12286e-46		BCAP29	7.26e-18	0.132786	0.269	0.165	1.65e-13		FERMT3	1.24e-18	0.253544	0.335	0.193	2.83e-14
F11R	1.32e-20	0.184879	0.18	0.074	3e-16		SERPINB1	3.01e-36	0.300761	0.53	0.278	6.84e-32		ATP6V1C1	8.8021e-30	0.190314	0.235	0.09	2.00186e-25		MPHOSPH6	1.76917e-47	0.317634	0.329	0.095	4.02363e-43		FKBP4	6.83e-27	0.132734	0.211	0.101	1.55e-22		MBD2	8.83e-30	0.252606	0.497	0.276	2.01e-25
ADAMTS2	1.66e-11	0.184722	0.105	0.046	3.78e-07		MCTP1	2.75e-37	0.300171	0.176	0.034	6.25e-33		ATP6V0A1	1.12921e-22	0.189741	0.157	0.053	2.56815e-18		ARPC2	2.59171e-24	0.31699	0.861	0.65	5.89432e-20		BEX3	2.91e-17	0.132732	0.254	0.154	6.63e-13		ARPIN	5.34e-41	0.252556	0.203	0.054	1.22e-36
IL6R	1.14e-19	0.184657	0.147	0.054	2.58e-15		C4orf48	7.88e-36	0.30007	0.634	0.359	1.79e-31		GNPDA1	3.97306e-25	0.189511	0.169	0.056	9.03594e-21		FGD2	4.26707e-30	0.316684	0.242	0.077	9.7046e-26		AP5B1	5.37e-17	0.13269	0.144	0.071	1.22e-12		AC073352.2	7.06e-26	0.252382	0.101	0.02	1.6e-21
FGD2	3.55e-16	0.18438	0.167	0.077	8.07e-12		ATP6V0E1	3.52e-30	0.299152	0.708	0.457	8.01e-26		CAV2	7.08242e-19	0.189047	0.192	0.087	1.61075e-14		RAPGEF1	9.41944e-33	0.314266	0.44	0.197	2.14226e-28		PTK7	8.77e-20	0.132509	0.155	0.073	1.99e-15		TPM2	1.76e-22	0.251941	0.297	0.153	3.99e-18
DOK3	1.09e-18	0.184277	0.111	0.033	2.48e-14		NUCB1	5.64e-43	0.298986	0.446	0.196	1.28e-38		CHMP5	7.53998e-25	0.188796	0.477	0.281	1.71482e-20		LILRA2	1.50395e-30	0.313761	0.129	0.016	3.42044e-26		ARHGAP10	9.96e-27	0.132445	0.149	0.057	2.27e-22		DNM2	3.6e-30	0.251552	0.456	0.241	8.19e-26
NOTCH3	1.17e-13	0.184164	0.115	0.047	2.66e-09		MFSD12	9.18e-55	0.298662	0.352	0.11	2.09e-50		STX4	2.51114e-26	0.188649	0.283	0.13	5.71107e-22		NDRG1	2.58414e-40	0.313532	0.438	0.174	5.87711e-36		PLS3	4.45e-17	0.132417	0.145	0.073	1.01e-12		PSMA7	2.46e-21	0.251465	0.751	0.554	5.59e-17
ELOC	5.08e-23	0.18392	0.517	0.325	1.15e-18		HCAR2	6.1e-28	0.296998	0.11	0.014	1.39e-23		PSMB3	3.71928e-20	0.188467	0.624	0.434	8.45875e-16		PICALM	2.76642e-48	0.311419	0.493	0.19	6.29168e-44		AP3S1	2.65e-19	0.132178	0.337	0.217	6.02e-15		CCND1	3.27e-30	0.251186	0.258	0.107	7.44e-26
PSMB3	6.58e-20	0.183832	0.619	0.434	1.5e-15		SRGAP2	1.19e-33	0.296883	0.25	0.086	2.7e-29		ABHD12	2.13039e-32	0.188152	0.292	0.122	4.84515e-28		CTNNAL1	3.72822e-26	0.31125	0.182	0.053	8.47909e-22		SH3GL1	1.25e-21	0.13215	0.19	0.095	2.83e-17		MAP2K1	1e-35	0.251169	0.384	0.175	2.28e-31
ARHGEF11	3.61e-24	0.183774	0.105	0.019	8.21e-20		NUP62	7.01e-43	0.295903	0.253	0.069	1.59e-38		OAZ2	6.89048e-29	0.187744	0.236	0.094	1.5671e-24		LACC1	1.5733e-39	0.310476	0.176	0.026	3.57816e-35		NFE2L2	2.46e-15	0.131922	0.555	0.414	5.58e-11		DDAH2	1.26e-31	0.251095	0.333	0.152	2.86e-27
MFSD2A	5.69e-22	0.18338	0.118	0.031	1.29e-17		RBKS	1.48e-28	0.295778	0.171	0.046	3.36e-24		BID	2.15199e-22	0.187722	0.253	0.121	4.89426e-18		MAP7D1	8.28662e-40	0.310356	0.394	0.152	1.88463e-35		RNF149	4.49e-12	0.131921	0.596	0.467	1.02e-07		YWHAE	1.78e-24	0.251059	0.569	0.358	4.05e-20
SLC12A7	5.1e-25	0.183328	0.149	0.044	1.16e-20		FAM49B	6.86e-37	0.295538	0.571	0.304	1.56e-32		TMEM51	3.11608e-30	0.187641	0.144	0.031	7.08691e-26		MOB3B	2.78099e-51	0.310159	0.221	0.03	6.32482e-47		ARHGAP31	2.11e-15	0.131871	0.161	0.087	4.79e-11		RXRA	4.99e-48	0.250452	0.249	0.07	1.13e-43
MOB3B	1.09e-26	0.183198	0.131	0.03	2.48e-22		CLCN7	1.26e-39	0.295504	0.253	0.076	2.86e-35		LY86	6.83069e-16	0.187312	0.12	0.044	1.5535e-11		GNG10	3.69672e-53	0.309672	0.5	0.186	8.40746e-49		CTNND1	1.25e-29	0.131698	0.236	0.114	2.85e-25		SULF2	3.14e-37	0.250325	0.255	0.092	7.15e-33
LHFPL6	3.17e-16	0.182675	0.145	0.061	7.21e-12		RBPJ	4.64e-46	0.295498	0.512	0.238	1.06e-41		CD276	1.05266e-33	0.187056	0.207	0.063	2.39406e-29		UCP2	4.18889e-20	0.309451	0.51	0.3	9.52678e-16		MCL1	5.1e-09	0.131298	0.798	0.673	0.000115904		AL138963.4	6.72e-26	0.250209	0.252	0.111	1.53e-21
MICAL1	5.01e-21	0.182665	0.239	0.115	1.14e-16		RAP2B	6.02e-45	0.295376	0.314	0.102	1.37e-40		NQO2	8.70959e-33	0.186752	0.275	0.11	1.98082e-28		HAVCR2	1.79512e-31	0.308962	0.301	0.11	4.08263e-27		FAM20C	1.73e-20	0.131193	0.142	0.062	3.94e-16		PLEKHM2	1.83e-35	0.250024	0.404	0.191	4.16e-31
SH3BP2	2.72e-25	0.182603	0.22	0.091	6.18e-21		PSMB2	1.3e-33	0.295095	0.537	0.3	2.97e-29		LGALS9	3.88028e-21	0.186613	0.332	0.181	8.82492e-17		COL4A2	4.43894e-18	0.308543	0.22	0.092	1.00955e-13		LAMC1	7.02e-19	0.131085	0.173	0.088	1.6e-14		EIF4A3	9.9e-23	0.250001	0.521	0.313	2.25e-18
NFIC	2.33e-26	0.182394	0.246	0.105	5.3e-22		ARAP1	1.29e-42	0.294787	0.271	0.08	2.93e-38		CHMP2A	5.59131e-29	0.186613	0.386	0.2	1.27163e-24		LPCAT4	8.20994e-20	0.308453	0.216	0.089	1.86719e-15		FKBP15	9.3e-24	0.131085	0.194	0.094	2.11e-19		MESD	6.71e-27	0.249122	0.437	0.243	1.53e-22
CD276	1.19e-31	0.181718	0.199	0.063	2.71e-27		IL24	1.71e-17	0.294735	0.103	0.028	3.89e-13		AC007952.4	1.19176e-14	0.186601	0.133	0.057	2.71041e-10		ABCD1	4.61403e-36	0.307932	0.181	0.033	1.04937e-31		TMEM167A	1.17e-18	0.130929	0.397	0.268	2.66e-14		DCN	1.04e-11	0.249045	0.15	0.075	2.36e-07
RILP	4.42e-24	0.181527	0.138	0.04	1.01e-19		MBD2	5.65e-43	0.294288	0.482	0.219	1.28e-38		ABCD1	5.18696e-21	0.186551	0.12	0.033	1.17967e-16		SIPA1L1	2.42839e-38	0.307474	0.396	0.152	5.52289e-34		RPN1	2.31e-17	0.130883	0.413	0.287	5.25e-13		SSR3	3.11e-15	0.248999	0.527	0.366	7.06e-11
ARAP1	2.54e-26	0.181489	0.209	0.08	5.77e-22		NTAN1	3.77e-46	0.294258	0.28	0.081	8.58e-42		ARHGAP31	4.30841e-22	0.186097	0.161	0.057	9.79861e-18		FLNA	2.97764e-30	0.307473	0.634	0.359	6.77204e-26		SMS	3.37e-19	0.130853	0.317	0.199	7.66e-15		GPR132	1.82e-17	0.248741	0.315	0.179	4.14e-13
CHMP2A	6.24e-28	0.180888	0.378	0.2	1.42e-23		CAVIN1	1.49e-24	0.294165	0.245	0.105	3.38e-20		FILIP1L	1.92069e-12	0.186041	0.137	0.065	4.36822e-08		EVA1B	1.25618e-44	0.307359	0.29	0.076	2.85693e-40		MAFG	1.06e-18	0.130844	0.2	0.109	2.41e-14		PALLD	2.33e-26	0.24851	0.229	0.095	5.29e-22
RGS19	9.79e-24	0.180773	0.213	0.09	2.23e-19		NNMT	4e-22	0.293739	0.23	0.099	9.09e-18		FKBP15	3.99154e-30	0.185937	0.194	0.062	9.07796e-26		AHR	6.48278e-43	0.307317	0.453	0.177	1.47438e-38		GCA	3.56e-17	0.130677	0.266	0.162	8.09e-13		NRIP1	2.52e-32	0.248116	0.299	0.128	5.73e-28
NRIP1	1.91e-26	0.180766	0.222	0.089	4.34e-22		KDELR1	1.5e-33	0.293661	0.452	0.235	3.41e-29		ELOC	4.3421e-23	0.185813	0.521	0.325	9.87524e-19		SERPINB9	2.13249e-21	0.306251	0.517	0.3	4.84993e-17		CHMP2A	2.61e-21	0.130608	0.386	0.249	5.93e-17		ITGAM	3.77e-26	0.247786	0.143	0.042	8.57e-22
LAT2	3.71e-19	0.18056	0.163	0.067	8.44e-15		LPCAT2	5.66e-52	0.293458	0.243	0.049	1.29e-47		ARNTL2	1.10316e-23	0.18581	0.157	0.052	2.50892e-19		TBC1D14	9.55095e-39	0.306203	0.261	0.07	2.17217e-34		RILPL2	6.98e-11	0.13053	0.406	0.305	1.59e-06		GLMP	1.35e-42	0.247668	0.3	0.108	3.08e-38
TPM2	2.57e-15	0.180456	0.23	0.129	5.84e-11		EIF4A3	6.16e-29	0.293431	0.493	0.264	1.4e-24		ADPGK	2.53771e-26	0.185332	0.311	0.15	5.77151e-22		TNFAIP3	7.31798e-23	0.306154	0.875	0.679	1.66433e-18		PSMA6	7.25e-16	0.130513	0.607	0.467	1.65e-11		FSCN1	2.42e-23	0.247004	0.239	0.11	5.5e-19
AP1B1	6.15e-30	0.180196	0.241	0.094	1.4e-25		TXNDC12	2.25e-39	0.292977	0.319	0.117	5.11e-35		SH3BP2	3.51699e-26	0.185151	0.226	0.091	7.99868e-22		NUP62	1.14837e-43	0.306139	0.274	0.069	2.61173e-39		RNF181	3.81e-19	0.130292	0.496	0.346	8.67e-15		CD276	2.04e-43	0.246397	0.282	0.097	4.64e-39
NUP62	9.12e-25	0.180188	0.186	0.069	2.08e-20		DPYSL2	1.25e-34	0.292754	0.249	0.084	2.83e-30		MAFG	2.76091e-26	0.185046	0.2	0.074	6.27914e-22		PSMA7	4.59378e-25	0.305939	0.751	0.498	1.04476e-20		CD276	2.09e-27	0.129956	0.207	0.097	4.76e-23		CCNB1	8.68e-28	0.246122	0.136	0.036	1.97e-23
MESD	1.72e-23	0.180132	0.36	0.201	3.91e-19		F11R	3.37e-38	0.292301	0.248	0.074	7.67e-34		AP1B1	2.15323e-31	0.185005	0.248	0.094	4.89709e-27		HS3ST1	1.21331e-36	0.305805	0.156	0.02	2.75943e-32		OSTC	1.44e-10	0.129828	0.403	0.307	3.27e-06		VAMP3	6.1e-44	0.246115	0.364	0.148	1.39e-39
BCL3	1.89e-24	0.179999	0.28	0.136	4.3e-20		STARD3NL	2.08e-38	0.291866	0.284	0.096	4.73e-34		ST13	3.02826e-19	0.184995	0.415	0.254	6.88718e-15		FST	2.3077e-31	0.305735	0.132	0.017	5.24841e-27		CALM3	1.38e-18	0.129352	0.493	0.348	3.14e-14		ACOT9	2.36e-36	0.246072	0.438	0.211	5.37e-32
UBC	3.17e-12	0.179845	0.877	0.781	7.2e-08		ARHGEF11	3.06e-40	0.291849	0.156	0.019	6.96e-36		S100A8	3.20488e-55	0.184993	0.381	0.141	7.28886e-51		CCT5	7.30561e-29	0.305638	0.442	0.218	1.66152e-24		UBE2D1	6.25e-20	0.129216	0.262	0.153	1.42e-15		PROCR	1.19e-45	0.24605	0.224	0.06	2.71e-41
FKBP15	1.64e-28	0.17984	0.187	0.062	3.74e-24		PLEKHA7	2.02e-30	0.291273	0.129	0.02	4.6e-26		SLC25A24	3.0605e-32	0.184854	0.285	0.117	6.9605e-28		F11R	7.34429e-40	0.305425	0.272	0.074	1.67031e-35		STXBP2	1.99e-13	0.12917	0.33	0.228	4.53e-09		FLNA	1.91e-25	0.245729	0.634	0.409	4.35e-21
LY86	1.07e-15	0.179777	0.118	0.044	2.43e-11		S100A4	5.63e-48	0.289798	0.786	0.472	1.28e-43		IRAK1	1.01744e-30	0.184662	0.281	0.118	2.31395e-26		MICOS10	1.07849e-29	0.305031	0.648	0.383	2.45281e-25		PSMB3	3.71e-14	0.129141	0.624	0.492	8.44e-10		SLC35B2	1.51e-35	0.245636	0.303	0.124	3.42e-31
PDLIM3	1.27e-11	0.179759	0.114	0.053	2.89e-07		JAG1	1.24e-32	0.288294	0.216	0.067	2.83e-28		ACTR3	1.04017e-22	0.184595	0.588	0.38	2.36567e-18		EPN1	4.5837e-43	0.305027	0.325	0.099	1.04247e-38		EIF4A1	1.6e-12	0.128889	0.761	0.653	3.64e-08		MICOS10	3.81e-26	0.245581	0.648	0.431	8.66e-22
ARHGAP31	1.34e-21	0.179714	0.158	0.057	3.04e-17		IRAK1	5.08e-49	0.288115	0.351	0.118	1.16e-44		MYO1E	1.90083e-24	0.184443	0.23	0.099	4.32307e-20		UQCRC1	1.69562e-42	0.305022	0.505	0.219	3.85635e-38		HES1	2.09e-20	0.128776	0.173	0.085	4.75e-16		ARPC2	2e-19	0.245442	0.861	0.703	4.54e-15
NME2	7.49e-16	0.179663	0.647	0.511	1.7e-11		C9orf72	1.43e-26	0.287917	0.269	0.114	3.26e-22		BCL3	1.64064e-25	0.184441	0.287	0.136	3.7313e-21		MBD2	2.25703e-38	0.30488	0.497	0.219	5.13317e-34		PSMB6	1.3e-16	0.128568	0.505	0.367	2.96e-12		SDSL	1.27e-39	0.245191	0.177	0.043	2.9e-35
NR4A1	9.56e-23	0.179554	0.485	0.304	2.18e-18		SLC44A1	5.82e-41	0.28791	0.273	0.087	1.32e-36		IRAK2	7.3129e-21	0.184227	0.139	0.046	1.66317e-16		CTNND1	4.86131e-53	0.304679	0.327	0.083	1.10561e-48		PICALM	2.31e-24	0.128461	0.383	0.236	5.26e-20		SEPTIN10	9.56e-38	0.245155	0.233	0.077	2.17e-33
ACTR3	2.95e-22	0.179498	0.58	0.38	6.7e-18		UBE2D1	3.22e-41	0.28754	0.323	0.115	7.32e-37		PATL1	3.36654e-25	0.184026	0.228	0.096	7.65653e-21		SULF2	5.67104e-42	0.304657	0.255	0.062	1.28976e-37		RASGEF1B	6.94e-14	0.128444	0.317	0.216	1.58e-09		MT-ND2	1.35e-16	0.244671	0.992	0.934	3.07e-12
CEP68	1.08e-15	0.179202	0.134	0.056	2.46e-11		RRAGD	1.02e-34	0.287336	0.157	0.028	2.32e-30		ANGPTL4	3.9226e-17	0.183925	0.112	0.036	8.92117e-13		RGS19	1.33041e-40	0.304591	0.302	0.09	3.02575e-36		ZMIZ1	1.43e-18	0.128382	0.236	0.137	3.25e-14		NDRG1	1.2e-33	0.244371	0.438	0.218	2.73e-29
ABHD12	1.25e-30	0.178837	0.283	0.122	2.84e-26		MFSD2A	1.16e-37	0.287088	0.171	0.031	2.64e-33		MEST	3.79001e-16	0.183631	0.118	0.042	8.61961e-12		FAM83A	6.38164e-26	0.304438	0.13	0.024	1.45138e-21		NT5E	1.02e-15	0.128364	0.163	0.089	2.31e-11		SERPINB9	1.11e-15	0.244369	0.517	0.353	2.52e-11
MAFG	1.74e-25	0.178819	0.196	0.074	3.97e-21		NCF4	1.47e-28	0.286845	0.278	0.115	3.34e-24		F11R	3.16105e-22	0.183617	0.187	0.074	7.18917e-18		GPR34	8.76114e-32	0.304393	0.152	0.025	1.99255e-27		RHBDF2	6.05e-20	0.128274	0.234	0.131	1.38e-15		SMIM4	4.11e-38	0.244241	0.329	0.134	9.35e-34
LRPAP1	3.74e-26	0.178805	0.307	0.151	8.51e-22		SMIM4	2.22e-44	0.28667	0.316	0.104	5.05e-40		CFLAR	7.2201e-14	0.183504	0.655	0.482	1.64207e-09		DDAH2	9.32538e-40	0.30386	0.333	0.112	2.12087e-35		PHACTR1	5.07e-09	0.128237	0.152	0.098	0.000115316		MYO1B	2.32e-25	0.244007	0.223	0.094	5.27e-21
SHKBP1	7.35e-25	0.17862	0.228	0.096	1.67e-20		PSMA7	1.41e-27	0.286569	0.734	0.498	3.2e-23		CALM3	1.48114e-24	0.183264	0.493	0.295	3.36855e-20		ARHGAP10	1.13461e-48	0.303791	0.224	0.035	2.58045e-44		RHOG	2.03e-17	0.12807	0.475	0.333	4.63e-13		HS3ST1	2.03e-34	0.243782	0.156	0.038	4.63e-30
ARF1	5.02e-20	0.178052	0.582	0.402	1.14e-15		VMP1	1.51e-37	0.286334	0.583	0.314	3.43e-33		STXBP2	1.46198e-19	0.183234	0.33	0.186	3.32499e-15		ITGA3	3.00799e-31	0.303648	0.192	0.047	6.84108e-27		PDLIM5	8.01e-19	0.12803	0.269	0.163	1.82e-14		JPT1	4.17e-21	0.243768	0.593	0.399	9.47e-17
IFNAR1	3.86e-24	0.177759	0.279	0.136	8.77e-20		NIBAN2	1.18e-53	0.286253	0.301	0.08	2.68e-49		HAPLN3	5.79279e-26	0.183144	0.238	0.099	1.31745e-21		PSMD1	9.85643e-37	0.303508	0.377	0.147	2.24165e-32		NAPA	8.63e-20	0.127992	0.501	0.35	1.96e-15		S100A14	1.64e-21	0.243707	0.175	0.069	3.72e-17
CTDNEP1	8.57e-27	0.177681	0.393	0.215	1.95e-22		HS3ST1	6.57e-37	0.285852	0.149	0.02	1.49e-32		MOB3B	9.42853e-28	0.183132	0.135	0.03	2.14433e-23		CD276	1.2613e-49	0.303496	0.282	0.063	2.86857e-45		RBKS	5.02e-13	0.127914	0.125	0.065	1.14e-08		LAD1	6.42e-35	0.243698	0.136	0.028	1.46e-30
BCL2L1	4.89e-30	0.177658	0.251	0.102	1.11e-25		LIPA	3.87e-45	0.285671	0.317	0.105	8.8e-41		VPS35	1.46464e-28	0.183083	0.339	0.165	3.33103e-24		PDGFB	1.16289e-35	0.302727	0.164	0.025	2.64477e-31		ACTR3	1.3e-15	0.127861	0.588	0.437	2.96e-11		ABR	1.31e-30	0.243416	0.267	0.111	2.98e-26
COL7A1	1.65e-17	0.177545	0.137	0.053	3.76e-13		SLC12A7	3.84e-40	0.285578	0.203	0.044	8.73e-36		CEP68	6.91461e-17	0.183072	0.14	0.056	1.57259e-12		ERP44	5.2843e-43	0.301848	0.392	0.137	1.20181e-38		JOSD2	2.91e-25	0.127489	0.297	0.168	6.62e-21		ATP1B1	8.01e-33	0.243226	0.256	0.098	1.82e-28
AGFG1	1.3e-23	0.177414	0.283	0.141	2.95e-19		GSAP	4.69e-36	0.28555	0.22	0.062	1.07e-31		IGF2BP2	7.55912e-23	0.183068	0.127	0.035	1.71917e-18		LPCAT2	2.93087e-53	0.301574	0.264	0.049	6.66567e-49		MYO1C	1.02e-20	0.127487	0.21	0.113	2.31e-16		EPN1	2.11e-37	0.242762	0.325	0.134	4.79e-33
STXBP2	3.21e-19	0.177239	0.326	0.186	7.3e-15		PDE4DIP	8.33e-44	0.285447	0.337	0.119	1.89e-39		MYOF	3.79564e-35	0.183008	0.224	0.072	8.63243e-31		AP2A2	6.77893e-41	0.301199	0.257	0.064	1.54173e-36		AP1B1	1.3e-23	0.127425	0.248	0.133	2.95e-19		TES	3.1e-28	0.242493	0.383	0.196	7.04e-24
CALM3	1.4e-23	0.177201	0.485	0.295	3.2e-19		RAPGEF1	7.93e-35	0.284786	0.421	0.197	1.8e-30		RHOBTB3	4.75028e-20	0.182901	0.172	0.069	1.08036e-15		AC092803.1	1.69338e-33	0.301128	0.131	0.013	3.85125e-29		SORT1	1.05e-21	0.127392	0.118	0.045	2.39e-17		BCL3	6.14e-26	0.242424	0.348	0.175	1.4e-21
ENPP2	7.4e-20	0.177099	0.106	0.028	1.68e-15		ANGPTL4	6.59e-24	0.284654	0.139	0.036	1.5e-19		HDGF	4.47241e-23	0.182768	0.306	0.159	1.01716e-18		DENND3	1.41403e-37	0.300988	0.304	0.098	3.21592e-33		KIF1B	4.78e-24	0.127085	0.216	0.11	1.09e-19		FAM49B	5.71e-28	0.24185	0.589	0.351	1.3e-23
SLC25A24	3.03e-31	0.176973	0.279	0.117	6.88e-27		PPIB	2.4e-21	0.284307	0.703	0.52	5.45e-17		IRS2	8.75345e-23	0.182559	0.212	0.09	1.9908e-18		GPR132	2.70782e-22	0.300736	0.315	0.144	6.15839e-18		PPP1R18	3.57e-16	0.126958	0.367	0.249	8.11e-12		MOB3B	2.27e-45	0.241662	0.221	0.058	5.15e-41
FBN1	3.96e-16	0.175961	0.13	0.052	9e-12		THBS2	5.54e-24	0.283842	0.138	0.035	1.26e-19		LAT2	7.71909e-19	0.182307	0.164	0.067	1.75555e-14		BCL3	6.35217e-33	0.300668	0.348	0.136	1.44467e-28		DBNL	5.01e-19	0.126636	0.329	0.208	1.14e-14		TMEM33	2.24e-31	0.241592	0.311	0.139	5.1e-27
GNB1	1.1e-23	0.175918	0.51	0.318	2.51e-19		PDE4A	1.09e-30	0.283327	0.235	0.083	2.49e-26		ENPP2	1.99629e-20	0.182045	0.109	0.028	4.54016e-16		RAP2B	1.82981e-40	0.300161	0.322	0.102	4.16154e-36		P2RX4	7.3e-21	0.12663	0.217	0.116	1.66e-16		IGF2R	1.53e-36	0.2415	0.47	0.237	3.49e-32
PDLIM5	9.32e-24	0.175869	0.263	0.126	2.12e-19		AK4	8.61e-33	0.283121	0.165	0.036	1.96e-28		COX8A	1.633e-21	0.181941	0.727	0.552	3.71394e-17		MCTP1	8.12235e-34	0.299998	0.177	0.034	1.84727e-29		NAGK	2.09e-24	0.126626	0.354	0.211	4.76e-20		DENND3	5.12e-32	0.241361	0.304	0.13	1.16e-27
SLC44A1	5.94e-27	0.175614	0.218	0.087	1.35e-22		MYO1F	8.05e-31	0.282769	0.251	0.091	1.83e-26		PDLIM5	7.52582e-25	0.181766	0.269	0.126	1.7116e-20		SDSL	2.83236e-43	0.299848	0.177	0.021	6.44163e-39		RBPJ	7.54e-21	0.126326	0.44	0.293	1.71e-16		AHNAK2	2.32e-34	0.241085	0.124	0.023	5.27e-30
MT-ND4	8.7e-12	0.175505	0.97	0.937	1.98e-07		ENPP2	4.1e-33	0.282563	0.151	0.028	9.31e-29		KLF7	1.74239e-25	0.181726	0.17	0.056	3.96272e-21		PROCR	4.58767e-52	0.299263	0.224	0.031	1.04337e-47		CES2	4.57e-16	0.126199	0.133	0.065	1.04e-11		IRAK2	4.77e-29	0.241041	0.208	0.076	1.08e-24
TMEM30A	7.22e-33	0.175174	0.32	0.144	1.64e-28		SDSL	5.52e-43	0.281666	0.166	0.021	1.26e-38		EI24	6.30148e-19	0.181595	0.235	0.118	1.43315e-14		SLC35B2	3.0333e-44	0.299015	0.303	0.085	6.89862e-40		BCL3	6.18e-19	0.126197	0.287	0.175	1.41e-14		SLC3A2	2.09e-20	0.240929	0.541	0.353	4.76e-16
DEK	1.87e-24	0.175115	0.525	0.326	4.26e-20		NRIP1	7.34e-38	0.281585	0.271	0.089	1.67e-33		OS9	3.45896e-27	0.181579	0.385	0.205	7.86672e-23		DBNDD2	5.52257e-56	0.299005	0.383	0.108	1.256e-51		FERMT3	4.39e-08	0.125986	0.258	0.193	0.000998943		GPR137B	2.2e-26	0.240916	0.273	0.123	5.01e-22
NDRG1	5.67e-23	0.175084	0.328	0.174	1.29e-18		VAMP3	3.34e-50	0.281329	0.344	0.113	7.59e-46		PDLIM3	1.82527e-12	0.181566	0.119	0.053	4.15121e-08		PSMC1	2.67867e-39	0.298977	0.396	0.154	6.0921e-35		ENPP2	1.42e-14	0.125925	0.109	0.051	3.23e-10		COL4A2	4.92e-16	0.240813	0.22	0.11	1.12e-11
NBN	3.79e-21	0.174594	0.276	0.14	8.63e-17		BID	1.89e-36	0.280782	0.312	0.121	4.3e-32		KIAA0930	1.58057e-29	0.181406	0.216	0.078	3.59469e-25		SRGAP2	4.15258e-31	0.298694	0.259	0.086	9.44422e-27		PNRC1	1.84e-06	0.125637	0.843	0.758	0.0418978		NME2	3.23e-16	0.24067	0.699	0.549	7.35e-12
YWHAE	4.1e-22	0.174348	0.499	0.313	9.33e-18		NAGA	2.13e-48	0.280698	0.215	0.039	4.84e-44		SERPINE2	8.6445e-20	0.181309	0.117	0.034	1.96602e-15		RHOD	5.22998e-21	0.29813	0.153	0.044	1.18945e-16		SLC25A5	4.53e-08	0.125431	0.569	0.478	0.00103072		PA2G4	2.83e-24	0.240636	0.469	0.282	6.44e-20
SESN2	1.01e-20	0.174121	0.164	0.062	2.29e-16		NUMB	1.39e-39	0.280464	0.317	0.115	3.16e-35		C4orf48	1.50016e-21	0.180817	0.555	0.359	3.41182e-17		UBE2E2	1.53516e-46	0.297543	0.249	0.051	3.49143e-42		DSG2	1.92e-17	0.125409	0.1	0.039	4.37e-13		FKBP4	2.84e-45	0.240613	0.291	0.101	6.46e-41
SPCS3	5.52e-23	0.174115	0.476	0.289	1.26e-18		IFNAR1	1.12e-36	0.280311	0.336	0.136	2.55e-32		LRPAP1	1.97153e-26	0.180805	0.311	0.151	4.48384e-22		PSMA4	7.60151e-35	0.297168	0.543	0.264	1.72881e-30		SRC	5.28e-23	0.125334	0.143	0.059	1.2e-18		COL6A3	2.48e-13	0.239962	0.182	0.094	5.64e-09
ATP6V1G1	3.01e-15	0.173833	0.666	0.498	6.85e-11		SERPINE2	7.78e-29	0.279397	0.15	0.034	1.77e-24		AGFG1	1.65952e-24	0.180682	0.29	0.141	3.77425e-20		ELOC	2.37296e-32	0.296296	0.606	0.325	5.39681e-28		SLC39A1	4.81e-19	0.125126	0.221	0.123	1.09e-14		ANXA11	3.86e-26	0.239414	0.502	0.288	8.77e-22
ST13	1.19e-18	0.173745	0.409	0.254	2.72e-14		PFN1	9.97e-42	0.27933	0.935	0.802	2.27e-37		TMEM167A	1.68851e-24	0.180319	0.397	0.221	3.84018e-20		CMIP	4.54218e-40	0.296075	0.455	0.185	1.03303e-35		PRRX1	1.39e-08	0.125094	0.115	0.07	0.000316888		MCTP1	9.05e-27	0.239283	0.177	0.061	2.06e-22
CD82	7.42e-17	0.173686	0.285	0.164	1.69e-12		FAM20A	5.74e-32	0.279103	0.173	0.042	1.31e-27		CTNNAL1	1.26469e-15	0.179809	0.13	0.053	2.87628e-11		COX8A	6.8936e-30	0.295463	0.791	0.552	1.56781e-25		CAPZA2	2.11e-21	0.125043	0.437	0.291	4.8e-17		PDGFB	9.18e-28	0.239075	0.164	0.051	2.09e-23
RHOBTB3	3.56e-19	0.173464	0.167	0.069	8.1e-15		SLC3A2	1.1e-29	0.278905	0.527	0.297	2.51e-25		FGD2	6.71654e-16	0.179752	0.167	0.077	1.52754e-11		DCUN1D3	9.15073e-37	0.295422	0.18	0.031	2.08115e-32		IFFO1	1.01e-16	0.124781	0.142	0.07	2.31e-12		MRPS5	1.11e-25	0.238962	0.335	0.172	2.51e-21
EHD1	1.94e-16	0.173122	0.217	0.111	4.4e-12		LRRC25	4.11e-32	0.278774	0.117	0.012	9.34e-28		CARD16	1.53078e-18	0.179602	0.408	0.244	3.48145e-14		HSPB1	8.20431e-48	0.295405	0.579	0.266	1.86591e-43		AGRN	3.44e-19	0.124712	0.189	0.101	7.83e-15		LINC01094	2.11e-28	0.238911	0.115	0.025	4.8e-24
AC007952.4	1.19e-13	0.172954	0.128	0.057	2.7e-09		P2RX7	1e-28	0.278668	0.114	0.015	2.27e-24		MFAP2	2.07927e-17	0.179329	0.145	0.058	4.72887e-13		KIF1B	1.64616e-38	0.294982	0.286	0.085	3.74386e-34		ITGB1	3.9e-12	0.124616	0.53	0.415	8.86e-08		FGD2	1.62e-23	0.238674	0.242	0.108	3.68e-19
SERF2	1.53e-19	0.172946	0.923	0.835	3.47e-15		PATL1	1.31e-39	0.27825	0.285	0.096	2.99e-35		SMIM4	5.02847e-28	0.179309	0.252	0.104	1.14362e-23		FAM49B	1.90745e-32	0.294747	0.589	0.304	4.33812e-28		ATP6V1E1	1.11e-21	0.124528	0.314	0.189	2.53e-17		NFIC	3.38e-31	0.238663	0.316	0.141	7.69e-27
TMEM167A	1.63e-23	0.172836	0.39	0.221	3.7e-19		IGF2BP2	2.05e-36	0.277803	0.172	0.035	4.66e-32		IL18	3.08371e-26	0.179084	0.13	0.029	7.01329e-22		ARPIN	2.11376e-44	0.294732	0.203	0.031	4.80731e-40		AHCY	2.44e-16	0.124506	0.171	0.093	5.54e-12		BCKDK	5.22e-31	0.237982	0.269	0.112	1.19e-26
ARHGDIA	7.94e-21	0.172825	0.553	0.355	1.81e-16		CTDNEP1	8.62e-40	0.27756	0.459	0.215	1.96e-35		NUP62	2.92234e-26	0.179061	0.194	0.069	6.64627e-22		KLF10	7.60988e-40	0.293869	0.376	0.135	1.73071e-35		MAPK6	1.49e-19	0.12437	0.237	0.135	3.38e-15		ARHGEF10L	3.26e-34	0.237709	0.166	0.044	7.41e-30
RAP2B	4.87e-24	0.172503	0.232	0.102	1.11e-19		ATP6V1G1	1.67e-24	0.277125	0.724	0.498	3.8e-20		SESN2	2.32035e-21	0.178964	0.167	0.062	5.27718e-17		ATP6AP2	4.75965e-40	0.293085	0.503	0.22	1.08249e-35		PDLIM1	4.49e-10	0.124312	0.224	0.158	1.02e-05		MT1X	3.73e-23	0.237635	0.555	0.371	8.49e-19
DCUN1D3	8.95e-22	0.171661	0.118	0.031	2.04e-17		BCKDK	4.44e-42	0.276756	0.261	0.077	1.01e-37		CH25H	5.94984e-11	0.178928	0.191	0.11	1.35317e-06		PATL1	2.16382e-37	0.293079	0.299	0.096	4.92117e-33		CHPF	1.57e-18	0.124224	0.18	0.095	3.56e-14		MPZL1	3.17e-34	0.237288	0.263	0.103	7.22e-30
MYO1B	2.46e-17	0.171604	0.17	0.077	5.59e-13		SLC35B2	8.44e-44	0.276753	0.28	0.085	1.92e-39		LIMA1	3.32356e-15	0.178886	0.245	0.137	7.55878e-11		RXRA	9.98887e-49	0.292888	0.249	0.047	2.27177e-44		CEP68	1.49e-14	0.123988	0.14	0.073	3.38e-10		NUP62	5.07e-39	0.236699	0.274	0.098	1.15e-34
TMED9	3.53e-20	0.171547	0.377	0.224	8.02e-16		PDCD1LG2	6.49e-39	0.276668	0.143	0.015	1.48e-34		NR4A1	4.52708e-23	0.178833	0.491	0.304	1.02959e-18		SLC12A7	7.579e-39	0.292557	0.213	0.044	1.72369e-34		PSMA4	3.03e-20	0.123976	0.472	0.327	6.89e-16		FES	3.59e-30	0.23648	0.202	0.07	8.15e-26
SSR1	3.08e-23	0.171519	0.365	0.203	7e-19		CALB1	1.49e-23	0.276553	0.125	0.029	3.39e-19		SLIRP	5.6616e-23	0.178601	0.481	0.296	1.28762e-18		SLC2A1	1.34209e-23	0.292424	0.184	0.058	3.05231e-19		SPG21	2.18e-20	0.12395	0.363	0.231	4.96e-16		IL6R	4.63e-29	0.236285	0.224	0.086	1.05e-24
PLEKHG2	4.37e-19	0.171286	0.227	0.112	9.93e-15		LY86	2.81e-30	0.276377	0.173	0.044	6.39e-26		TMBIM6	8.25023e-15	0.17852	0.679	0.516	1.87635e-10		NUCB1	1.11699e-34	0.292302	0.445	0.196	2.54036e-30		SESN2	2.3e-15	0.123778	0.167	0.092	5.24e-11		LILRA2	3.61e-26	0.236059	0.129	0.034	8.22e-22
DPH3	1.24e-27	0.17091	0.258	0.11	2.82e-23		TMEM167A	2.62e-38	0.276345	0.465	0.221	5.97e-34		CD82	5.95764e-17	0.178333	0.288	0.164	1.35495e-12		AC073352.2	1.03267e-24	0.291192	0.101	0.012	2.3486e-20		MRPL18	6.03e-20	0.123717	0.261	0.153	1.37e-15		KIF13A	9.14e-39	0.235704	0.215	0.065	2.08e-34
CCND1	1.1e-17	0.170777	0.188	0.089	2.49e-13		DENND3	1.07e-35	0.276237	0.277	0.098	2.44e-31		TMEM30A	2.92454e-34	0.178323	0.328	0.144	6.65128e-30		LYSMD2	1.94281e-39	0.290869	0.336	0.112	4.41853e-35		PRDX3	4.45e-20	0.123698	0.399	0.264	1.01e-15		HCAR2	3.48e-32	0.235679	0.126	0.025	7.92e-28
CMIP	3.76e-26	0.170591	0.355	0.185	8.55e-22		STX12	1.06e-44	0.275782	0.327	0.111	2.42e-40		MPZL1	3.59346e-27	0.178292	0.206	0.077	8.17261e-23		PDE4A	8.17268e-28	0.290405	0.242	0.083	1.85871e-23		DOCK5	1.18e-20	0.123278	0.138	0.059	2.68e-16		AP2A2	1.67e-29	0.235086	0.257	0.105	3.79e-25
GNG10	3.24e-35	0.17058	0.387	0.186	7.36e-31		ACSL4	1.66e-45	0.275487	0.345	0.122	3.77e-41		VAMP3	1.2407e-31	0.17798	0.276	0.113	2.82172e-27		RABGEF1	2.99794e-34	0.290195	0.252	0.074	6.81822e-30		LRRC59	1.3e-17	0.123095	0.297	0.191	2.96e-13		NNMT	4.43e-23	0.234831	0.259	0.119	1.01e-18
MCTP1	2.19e-20	0.170354	0.118	0.034	4.99e-16		CD276	1.57e-46	0.275452	0.254	0.063	3.58e-42		FBN1	2.7376e-17	0.177939	0.136	0.052	6.22613e-13		RAB8A	9.04826e-42	0.28927	0.388	0.139	2.05785e-37		TEAD1	2.99e-19	0.122977	0.155	0.075	6.8e-15		TBC1D14	2.66e-32	0.234797	0.261	0.101	6.04e-28
MYOF	1.64e-32	0.170255	0.214	0.072	3.72e-28		FSTL3	2.08e-33	0.274816	0.173	0.04	4.73e-29		BAX	9.90051e-28	0.177914	0.545	0.328	2.25167e-23		BCKDK	1.77291e-38	0.289079	0.269	0.077	4.03212e-34		RCC2	2.3e-22	0.122967	0.223	0.117	5.23e-18		ABCD1	7.92e-33	0.234623	0.181	0.054	1.8e-28
RAP1A	6.67e-20	0.169586	0.505	0.323	1.52e-15		NBN	3.16e-34	0.274785	0.339	0.14	7.18e-30		BCL2L1	2.67095e-31	0.177466	0.258	0.102	6.07455e-27		CFH	9.93995e-33	0.287824	0.254	0.078	2.26064e-28		CD82	3.07e-11	0.122918	0.288	0.202	6.98e-07		CDC42EP2	1.83e-28	0.234413	0.191	0.067	4.17e-24
PLOD1	3.08e-26	0.169421	0.188	0.067	7e-22		ARHGEF10L	2.97e-39	0.274602	0.158	0.022	6.75e-35		MXRA5	2.3084e-20	0.177465	0.12	0.035	5.24999e-16		ARHGEF10L	6.79851e-39	0.287698	0.166	0.022	1.54618e-34		EPSTI1	2.34e-16	0.122882	0.582	0.439	5.32e-12		BACH1	7.88e-22	0.233995	0.404	0.229	1.79e-17
NAGA	2.04e-28	0.169139	0.15	0.039	4.64e-24		TMBIM6	4.94e-24	0.274357	0.739	0.516	1.12e-19		NRIP1	4.3047e-27	0.177307	0.226	0.089	9.79018e-23		LRRC25	1.41473e-31	0.287146	0.122	0.012	3.21752e-27		IFI6	2.15e-10	0.122867	0.785	0.685	4.89e-06		F11R	4.68e-38	0.233893	0.272	0.098	1.06e-33
KLF7	7.53e-24	0.168837	0.163	0.056	1.71e-19		PNPLA6	6.77e-40	0.274035	0.273	0.086	1.54e-35		CTDNEP1	1.30566e-27	0.177183	0.401	0.215	2.96946e-23		LIMA1	7.322e-19	0.286551	0.281	0.137	1.66524e-14		BMP2K	4.29e-17	0.12286	0.223	0.13	9.77e-13		RABGEF1	2.7e-29	0.233833	0.252	0.102	6.14e-25
MFAP2	5.36e-16	0.168805	0.138	0.058	1.22e-11		KLF10	5.51e-41	0.273972	0.353	0.135	1.25e-36		UQCRC1	3.37501e-30	0.177105	0.414	0.219	7.67578e-26		BCL2L1	2.20914e-44	0.285769	0.333	0.102	5.02424e-40		MRPS5	1.67e-17	0.122839	0.276	0.172	3.8e-13		TNFRSF10B	5.82e-23	0.233082	0.238	0.107	1.32e-18
PICALM	3.53e-29	0.168768	0.373	0.19	8.02e-25		AP2A2	1.29e-41	0.273918	0.242	0.064	2.94e-37		LHFPL6	4.46501e-17	0.176808	0.149	0.061	1.01548e-12		IRF2BP2	4.31124e-34	0.285446	0.516	0.241	9.80505e-30		IFIH1	5.77e-15	0.122736	0.35	0.237	1.31e-10		PTPRF	3.13e-30	0.232457	0.148	0.04	7.11e-26
PDE4A	5.26e-18	0.168236	0.182	0.083	1.2e-13		UBC	5.76e-22	0.273803	0.913	0.781	1.31e-17		ARHGDIA	2.84734e-21	0.176749	0.56	0.355	6.4757e-17		CAPZA2	7.63731e-41	0.284861	0.513	0.225	1.73695e-36		TLNRD1	1.45e-21	0.12266	0.204	0.104	3.29e-17		IL15	4.43e-39	0.232285	0.238	0.077	1.01e-34
GRK3	7.66e-20	0.168154	0.139	0.049	1.74e-15		ATP6AP2	1.54e-41	0.273799	0.475	0.22	3.5e-37		AK4	6.23247e-21	0.17659	0.124	0.036	1.41745e-16		RILP	1.60638e-36	0.284513	0.195	0.04	3.65339e-32		ACSL4	1.15e-22	0.122652	0.291	0.169	2.62e-18		DBNL	7.41e-33	0.231882	0.42	0.208	1.68e-28
MYO1F	4.61e-17	0.168117	0.191	0.091	1.05e-12		NDRG1	4.5e-38	0.273406	0.401	0.174	1.02e-33		VASP	1.82714e-25	0.176543	0.381	0.205	4.15547e-21		SERPINB1	1.36335e-31	0.284301	0.547	0.278	3.10067e-27		LPCAT2	3.12e-24	0.122617	0.167	0.073	7.11e-20		LRRC25	3.49e-25	0.23161	0.122	0.032	7.95e-21
RAB1B	2.21e-24	0.168023	0.306	0.153	5.02e-20		TBC1D14	1.92e-37	0.273327	0.239	0.07	4.36e-33		SLC12A7	1.52695e-25	0.176276	0.153	0.044	3.47275e-21		MESD	2.23231e-32	0.284275	0.437	0.201	5.07693e-28		MGST3	2.58e-17	0.122602	0.417	0.284	5.87e-13		ELOC	2.18e-25	0.231429	0.606	0.388	4.96e-21
UQCR10	1.02e-18	0.16782	0.682	0.504	2.32e-14		DYNLT1	3.72e-26	0.27331	0.688	0.451	8.46e-22		PICALM	5.56385e-31	0.176269	0.383	0.19	1.26539e-26		CFL1	1.60489e-24	0.284156	0.931	0.783	3.65e-20		PFKFB3	6e-10	0.122538	0.41	0.317	1.37e-05		CFH	3.67e-29	0.231299	0.254	0.103	8.34e-25
BAX	2.97e-26	0.167815	0.535	0.328	6.76e-22		HDGF	6.11e-34	0.273069	0.356	0.159	1.39e-29		ACTG1	1.34221e-10	0.17607	0.834	0.706	3.05258e-06		TRIM29	5.10427e-30	0.283487	0.139	0.022	1.16086e-25		MDM2	5.96e-17	0.12248	0.258	0.159	1.36e-12		MRPL52	7.35e-27	0.231124	0.545	0.334	1.67e-22
STX12	5.19e-27	0.167791	0.256	0.111	1.18e-22		JUP	1.2e-32	0.272928	0.228	0.074	2.74e-28		SEPTIN10	5.67055e-25	0.176014	0.168	0.056	1.28965e-20		IGFBP7	1.80849e-26	0.283251	0.303	0.124	4.11306e-22		AL138963.4	3.46e-14	0.122129	0.187	0.111	7.86e-10		C19orf33	4.58e-31	0.230946	0.187	0.058	1.04e-26
IGF2BP2	8.95e-21	0.167783	0.119	0.035	2.04e-16		LGALS9	1.58e-32	0.272767	0.39	0.181	3.59e-28		TMED9	3.47934e-20	0.175801	0.38	0.224	7.91307e-16		ANO6	1.34385e-39	0.28242	0.325	0.106	3.05632e-35		SH3BP2	7.59e-19	0.122108	0.226	0.127	1.73e-14		MLF2	4.64e-26	0.230357	0.48	0.285	1.06e-21
MXRA5	1.41e-18	0.167665	0.114	0.035	3.21e-14		BCL2L1	2.09e-46	0.272679	0.316	0.102	4.74e-42		YIF1B	7.74243e-31	0.175618	0.255	0.101	1.76086e-26		ATP6V1G1	3.32431e-21	0.281815	0.737	0.498	7.56048e-17		IGFBP6	1.26e-19	0.121889	0.105	0.04	2.86e-15		PKP3	1.57e-37	0.230317	0.133	0.024	3.58e-33
RBKS	2.05e-15	0.167579	0.121	0.046	4.66e-11		PRSS23	2.03e-21	0.271818	0.197	0.078	4.61e-17		IL6R	1.67813e-19	0.175519	0.148	0.054	3.81657e-15		LIMK2	1.41621e-44	0.281547	0.284	0.072	3.22088e-40		PPIC	1.4e-20	0.121784	0.176	0.087	3.18e-16		TXNDC17	1.21e-22	0.23016	0.551	0.361	2.75e-18
MEST	4.3e-15	0.167302	0.113	0.042	9.78e-11		RXRA	1.92e-47	0.271715	0.229	0.047	4.37e-43		ARHGEF11	1.31954e-25	0.175509	0.11	0.019	3.00102e-21		ARNTL2	3.41821e-36	0.281342	0.216	0.052	7.77404e-32		HSPA5	8.39e-11	0.121712	0.507	0.402	1.91e-06		SPG21	2.89e-32	0.229888	0.45	0.231	6.57e-28
PTPA	7.68e-26	0.167134	0.244	0.106	1.75e-21		PROCR	9.26e-50	0.271477	0.204	0.031	2.1e-45		RBKS	2.88368e-16	0.175144	0.125	0.046	6.55835e-12		EGFR	2.32234e-32	0.281192	0.167	0.032	5.28171e-28		ATP5MPL	1.46e-16	0.121654	0.614	0.467	3.33e-12		CLDN1	8.15e-34	0.229807	0.131	0.026	1.85e-29
PALLD	4.62e-18	0.166906	0.177	0.08	1.05e-13		HSPB1	5.45e-48	0.271406	0.543	0.266	1.24e-43		FSTL3	5.97667e-24	0.174891	0.139	0.04	1.35927e-19		SEPTIN10	5.03385e-39	0.280943	0.233	0.056	1.14485e-34		NDUFS8	8.37e-17	0.12165	0.416	0.29	1.9e-12		CIAO2A	1.73e-31	0.229708	0.486	0.266	3.94e-27
DBNDD2	4.88e-34	0.166684	0.274	0.108	1.11e-29		TNFAIP3	4.32e-25	0.271369	0.86	0.679	9.84e-21		GNG10	1.49464e-36	0.174852	0.396	0.186	3.39926e-32		C4orf48	1.01761e-30	0.280921	0.655	0.359	2.31436e-26		RENBP	1.27e-18	0.121649	0.129	0.057	2.89e-14		DPYSL2	1.3e-23	0.229676	0.259	0.122	2.96e-19
MMP2	4.5e-12	0.16637	0.129	0.062	1.02e-07		DEK	7.52e-38	0.270255	0.6	0.326	1.71e-33		RGS19	5.21152e-24	0.174776	0.217	0.09	1.18526e-19		TNFSF12	1.40842e-28	0.280711	0.31	0.124	3.20316e-24		HDLBP	7.51e-16	0.121648	0.374	0.262	1.71e-11		CYFIP1	1.38e-43	0.229342	0.301	0.107	3.14e-39
SPPL2A	5.58e-27	0.166343	0.391	0.212	1.27e-22		DNASE2	3.04e-40	0.270196	0.232	0.062	6.91e-36		MPHOSPH6	2.28243e-28	0.174693	0.237	0.095	5.19094e-24		ATP5PD	1.49233e-30	0.280558	0.641	0.357	3.394e-26		ILK	3.87e-24	0.121515	0.316	0.184	8.8e-20		DOK3	1.79e-22	0.229016	0.168	0.064	4.08e-18
PML	7.8e-26	0.166302	0.321	0.16	1.77e-21		COX8A	5.4e-34	0.270009	0.783	0.552	1.23e-29		RILP	6.16036e-24	0.173787	0.14	0.04	1.40105e-19		SMIM4	4.82448e-41	0.279653	0.329	0.104	1.09723e-36		SPINT1	4.78e-18	0.121439	0.115	0.048	1.09e-13		GPR34	6.94e-26	0.228972	0.152	0.047	1.58e-21
SMIM4	1.27e-25	0.166165	0.242	0.104	2.89e-21		DCUN1D3	1.14e-35	0.269578	0.165	0.031	2.59e-31		LAMC1	2.28138e-21	0.173762	0.173	0.067	5.18855e-17		HCAR2	2.34168e-31	0.278223	0.126	0.014	5.32567e-27		GLMP	1.99e-27	0.121372	0.225	0.108	4.53e-23		RNF181	1.01e-29	0.228937	0.593	0.346	2.3e-25
RAB34	2.31e-29	0.166069	0.217	0.08	5.25e-25		MT1X	1.62e-21	0.26952	0.521	0.338	3.69e-17		FAM20C	5.05087e-24	0.17348	0.142	0.041	1.14872e-19		MYL6	4.60771e-30	0.277984	0.944	0.834	1.04793e-25		ABR	5.74e-17	0.121336	0.197	0.111	1.31e-12		AL645608.7	7.96e-25	0.228799	0.112	0.028	1.81e-20
HM13	3.84e-21	0.165611	0.44	0.269	8.72e-17		EIF4G1	2.28e-24	0.269449	0.389	0.217	5.18e-20		KLF10	4.84001e-26	0.173427	0.29	0.135	1.10076e-21		BEST1	9.40561e-25	0.277897	0.218	0.076	2.13912e-20		CLN8	9.06e-14	0.121232	0.174	0.101	2.06e-09		SMS	9.17e-31	0.228683	0.397	0.199	2.08e-26
UQCRC1	3.05e-28	0.16533	0.404	0.219	6.93e-24		ARPIN	1.98e-41	0.269411	0.182	0.031	4.51e-37		RND3	4.4349e-20	0.17342	0.175	0.071	1.00863e-15		ERO1A	5.81303e-29	0.277773	0.359	0.155	1.32206e-24		AGFG1	9.63e-18	0.121077	0.29	0.18	2.19e-13		GLA	4.2e-27	0.228664	0.33	0.159	9.55e-23
IFI35	2.66e-19	0.16525	0.511	0.334	6.06e-15		BST2	3.53e-23	0.269292	0.683	0.455	8.02e-19		ATP6V1G1	1.54843e-15	0.173416	0.673	0.498	3.52159e-11		CALD1	4.99883e-22	0.277562	0.311	0.144	1.13688e-17		WIPI1	7.39e-17	0.121066	0.159	0.083	1.68e-12		TMED10	1.16e-19	0.228535	0.521	0.345	2.63e-15
MFSD12	1.08e-31	0.165186	0.268	0.11	2.46e-27		NDUFB1	9.76e-31	0.269063	0.548	0.305	2.22e-26		SLC2A1	9.32253e-12	0.173349	0.123	0.058	2.12022e-07		CTDNEP1	1.86517e-35	0.276873	0.474	0.215	4.24195e-31		DAPK1	8.67e-25	0.121016	0.163	0.069	1.97e-20		KDELR2	1.01e-19	0.228461	0.479	0.31	2.29e-15
APCDD1	8.47e-14	0.165178	0.1	0.036	1.93e-09		TNFSF12	9.68e-31	0.269007	0.298	0.124	2.2e-26		DOK3	5.99644e-18	0.173232	0.11	0.033	1.36377e-13		HAPLN3	1.45405e-32	0.276834	0.289	0.099	3.30694e-28		ELOC	1.38e-15	0.120946	0.521	0.388	3.13e-11		BEST1	3.23e-21	0.228103	0.218	0.099	7.35e-17
SORT1	9.48e-25	0.164822	0.113	0.023	2.16e-20		ELOC	1.65e-34	0.268618	0.581	0.325	3.75e-30		MYDGF	3.64238e-26	0.173171	0.393	0.218	8.28387e-22		TMEM167A	1.49657e-35	0.276194	0.487	0.221	3.40365e-31		STX12	6.97e-19	0.120823	0.261	0.154	1.59e-14		NUCB1	3.69e-26	0.228082	0.445	0.245	8.39e-22
PDE4DIP	7.81e-28	0.164734	0.27	0.119	1.78e-23		RAB8A	5.14e-44	0.268189	0.369	0.139	1.17e-39		NDRG1	1.32765e-23	0.173097	0.334	0.174	3.01948e-19		CCT6A	8.24759e-25	0.275695	0.441	0.234	1.87575e-20		ATP1B1	1.06e-16	0.120565	0.18	0.098	2.41e-12		PLOD1	6.87e-37	0.228079	0.256	0.092	1.56e-32
LAMC1	1.22e-19	0.164512	0.165	0.067	2.78e-15		TLR1	6.48e-31	0.268062	0.133	0.021	1.47e-26		STX12	1.31271e-27	0.172953	0.261	0.111	2.9855e-23		FES	1.93961e-34	0.275222	0.202	0.046	4.41126e-30		GDI2	7.96e-14	0.120498	0.464	0.341	1.81e-09		CXCL14	8.08e-29	0.228014	0.118	0.025	1.84e-24
BCKDK	5.83e-24	0.16447	0.194	0.077	1.33e-19		AC092803.1	5.48e-31	0.267725	0.117	0.013	1.25e-26		SORT1	2.41445e-26	0.172782	0.118	0.023	5.49118e-22		ITPRIPL2	5.71542e-46	0.274775	0.258	0.057	1.29986e-41		NSFL1C	1.03e-25	0.120428	0.223	0.11	2.35e-21		NR4A3	3.97e-23	0.226899	0.477	0.286	9.03e-19
VASP	7.98e-24	0.164192	0.372	0.205	1.81e-19		EHD1	1.57e-26	0.267447	0.267	0.111	3.56e-22		SIPA1L1	1.04931e-23	0.172701	0.305	0.152	2.38645e-19		MCEMP1	9.99652e-21	0.274524	0.101	0.017	2.27351e-16		TMED9	2.52e-13	0.120421	0.38	0.274	5.73e-09		TMEM167A	1e-29	0.226805	0.487	0.268	2.28e-25
LMAN1	9.82e-15	0.164135	0.356	0.228	2.23e-10		IVNS1ABP	4.88e-23	0.267057	0.509	0.3	1.11e-18		COLEC12	1.02142e-15	0.172597	0.1	0.032	2.32301e-11		TMEM219	4.65671e-28	0.2745	0.541	0.281	1.05908e-23		ARHGDIA	7.3e-15	0.120216	0.56	0.414	1.66e-10		SRGAP2	1.96e-25	0.22668	0.259	0.116	4.46e-21
FAM20C	2.45e-22	0.164112	0.135	0.041	5.57e-18		YWHAE	1.95e-32	0.266949	0.562	0.313	4.43e-28		CCT6A	4.55136e-19	0.172393	0.382	0.234	1.03512e-14		PDCD1LG2	1.14029e-38	0.274495	0.15	0.015	2.59337e-34		SNX5	2.5e-17	0.120149	0.326	0.21	5.68e-13		FAT1	2.5e-27	0.226664	0.179	0.062	5.69e-23
ETV5	5.19e-29	0.164017	0.142	0.033	1.18e-24		ASCL2	5.96e-39	0.2665	0.152	0.019	1.36e-34		SLC44A1	8.26399e-28	0.172185	0.223	0.087	1.87948e-23		RBPJ	2.94936e-38	0.274451	0.521	0.238	6.70773e-34		PSMD8	3.22e-15	0.120143	0.391	0.272	7.33e-11		DBNDD2	1.95e-46	0.226622	0.383	0.154	4.42e-42
YIF1B	1.32e-29	0.163763	0.248	0.101	3.01e-25		LRPAP1	5.18e-39	0.26603	0.367	0.151	1.18e-34		SERPINB5	5.74498e-12	0.172074	0.101	0.041	1.30658e-07		SLC3A2	4.18219e-26	0.274392	0.541	0.297	9.51156e-22		GOLIM4	7.1e-23	0.120077	0.185	0.089	1.61e-18		GGT5	3.32e-18	0.226092	0.212	0.102	7.56e-14
SLC15A4	4.84e-26	0.163663	0.225	0.092	1.1e-21		AGFG1	2.58e-38	0.265657	0.35	0.141	5.88e-34		RDX	3.34769e-25	0.171871	0.228	0.096	7.61365e-21		AEBP1	9.68656e-26	0.27427	0.243	0.087	2.20301e-21		UBE2E2	6.24e-24	0.120002	0.187	0.089	1.42e-19		RAB2A	3.63e-20	0.226057	0.493	0.316	8.26e-16
SEPTIN10	8.82e-23	0.163538	0.159	0.056	2.01e-18		PICALM	3.63e-47	0.26552	0.455	0.19	8.26e-43		CCT5	1.83315e-20	0.171862	0.372	0.218	4.16912e-16		TACSTD2	1.77345e-18	0.273752	0.153	0.05	4.03335e-14		GNG10	2.45e-26	0.119875	0.396	0.241	5.57e-22		EIF2S2	7.5e-17	0.225733	0.499	0.337	1.71e-12
FAM20A	2.62e-18	0.163518	0.124	0.042	5.96e-14		UBE2E2	1.44e-45	0.264973	0.229	0.051	3.27e-41		RAB2A	4.75023e-19	0.171788	0.435	0.272	1.08034e-14		FSTL1	7.74419e-24	0.273479	0.237	0.088	1.76126e-19		LMNA	7.89e-12	0.119852	0.554	0.435	1.8e-07		DCUN1D3	5.57e-28	0.225561	0.18	0.061	1.27e-23
HDGF	3.92e-21	0.163444	0.296	0.159	8.92e-17		SPPL2A	1.47e-41	0.264685	0.462	0.212	3.34e-37		MCTP1	1.16671e-20	0.171705	0.12	0.034	2.65345e-16		TXNDC17	1.45576e-26	0.273428	0.551	0.315	3.31082e-22		DYNLT1	3.97e-11	0.119586	0.63	0.508	9.03e-07		RGS19	3.92e-32	0.225299	0.302	0.128	8.92e-28
DNASE2	1.74e-25	0.163354	0.177	0.062	3.96e-21		CHMP2A	2.08e-38	0.264426	0.435	0.2	4.74e-34		SERF2	6.36899e-19	0.171688	0.922	0.835	1.4485e-14		MFSD2A	2.5518e-36	0.273371	0.178	0.031	5.80355e-32		MYL6	1.69e-14	0.119582	0.92	0.867	3.85e-10		IRS2	2.29e-29	0.225109	0.297	0.13	5.21e-25
ARHGEF10L	2.6e-23	0.162958	0.106	0.022	5.92e-19		ITPRIPL2	4.25e-45	0.264379	0.238	0.057	9.67e-41		EIF4G1	7.08656e-19	0.171592	0.358	0.217	1.6117e-14		SLIRP	1.044e-31	0.272908	0.559	0.296	2.37436e-27		ETV5	2.08e-24	0.119438	0.149	0.061	4.74e-20		ITPRIPL2	1.64e-39	0.224787	0.258	0.088	3.72e-35
DNAJB6	8.01e-17	0.162913	0.542	0.366	1.82e-12		ATP13A2	5.58e-38	0.264297	0.217	0.056	1.27e-33		MFSD2A	6.52387e-23	0.171152	0.122	0.031	1.48372e-18		AGRN	1.23198e-36	0.272794	0.253	0.071	2.8019e-32		CYB5R1	4.75e-17	0.119361	0.169	0.089	1.08e-12		CDC42SE1	9.17e-24	0.224346	0.54	0.322	2.09e-19
SLC36A1	2.47e-21	0.162901	0.119	0.033	5.62e-17		LIMK2	1.08e-41	0.264172	0.255	0.072	2.46e-37		DPH3	5.16296e-29	0.171114	0.265	0.11	1.17421e-24		LGALS9	6.10847e-30	0.272404	0.405	0.181	1.38925e-25		TMEM30A	2.42e-25	0.119342	0.328	0.192	5.51e-21		ADIPOR1	2.71e-38	0.224273	0.401	0.184	6.17e-34
TMEM219	2.83e-21	0.162792	0.46	0.281	6.43e-17		TMEM219	8.06e-33	0.264144	0.528	0.281	1.83e-28		RAB34	9.82813e-31	0.170991	0.223	0.08	2.23521e-26		IFNAR1	1.29431e-31	0.271668	0.342	0.136	2.94365e-27		ATP13A2	9.54e-20	0.119135	0.162	0.078	2.17e-15		LIMK2	1.12e-39	0.224204	0.284	0.102	2.54e-35
AP2A2	4.02e-26	0.162674	0.184	0.064	9.14e-22		ITGB7	6.21e-27	0.263083	0.213	0.076	1.41e-22		CNN3	1.56662e-16	0.170743	0.209	0.105	3.56296e-12		NAGA	4.59378e-47	0.271557	0.226	0.039	1.04476e-42		RAB34	2.81e-23	0.119038	0.223	0.117	6.39e-19		ERP44	8.4e-32	0.224204	0.392	0.19	1.91e-27
VPS35	2.95e-26	0.162445	0.328	0.165	6.71e-22		MAFG	8.99e-41	0.262859	0.255	0.074	2.04e-36		TRIP6	3.69017e-29	0.16982	0.196	0.066	8.39255e-25		PDIA6	1.61981e-23	0.270282	0.502	0.286	3.68393e-19		PLEKHM2	8.59e-20	0.118889	0.31	0.191	1.95e-15		FSTL1	1.21e-22	0.223871	0.237	0.106	2.76e-18
CLCN7	4.93e-21	0.162298	0.183	0.076	1.12e-16		EPN1	5.15e-42	0.262364	0.3	0.099	1.17e-37		BCKDK	1.54861e-24	0.169516	0.198	0.077	3.52201e-20		NT5C2	3.00709e-36	0.270084	0.256	0.072	6.83903e-32		CPVL	6.16e-23	0.11877	0.158	0.069	1.4e-18		PDCD1LG2	1.19e-34	0.223629	0.15	0.035	2.7e-30
AP1S2	5.08e-12	0.162258	0.208	0.121	1.15e-07		PLBD1	3.61e-37	0.262187	0.16	0.026	8.22e-33		ETV5	9.9275e-31	0.169497	0.149	0.033	2.25781e-26		LINC01094	1.36118e-31	0.270037	0.115	0.009	3.09573e-27		LAT2	3.02e-11	0.118449	0.164	0.101	6.87e-07		NCSTN	8.82e-29	0.223441	0.288	0.127	2.01e-24
ARNTL2	1.78e-21	0.162219	0.149	0.052	4.06e-17		VASP	2.26e-38	0.261944	0.445	0.205	5.14e-34		SHKBP1	3.60557e-25	0.169351	0.231	0.096	8.20015e-21		SUCNR1	1.07809e-30	0.269359	0.104	0.006	2.4519e-26		BCKDK	4.3e-17	0.118418	0.198	0.112	9.78e-13		RCC2	3.69e-38	0.222957	0.301	0.117	8.39e-34
PIK3R5	8.99e-15	0.161949	0.178	0.088	2.04e-10		BCL3	5.29e-34	0.261938	0.329	0.136	1.2e-29		TET2	1.88826e-20	0.169267	0.2	0.087	4.29448e-16		CTHRC1	6.51791e-12	0.269245	0.154	0.07	1.48237e-07		ARHGEF10L	2.92e-19	0.118282	0.111	0.044	6.65e-15		P2RX7	7.84e-26	0.22249	0.119	0.03	1.78e-21
NCF4	9.55e-15	0.161808	0.214	0.115	2.17e-10		UQCRC1	1.47e-42	0.261775	0.473	0.219	3.35e-38		SPCS3	6.69576e-23	0.169005	0.48	0.289	1.52282e-18		ENPP2	1.96446e-30	0.269109	0.153	0.028	4.46777e-26		PDLIM3	1.2e-10	0.118136	0.119	0.067	2.73e-06		CD300C	2.05e-29	0.222414	0.119	0.025	4.66e-25
MPHOSPH6	2.1e-25	0.161653	0.225	0.095	4.77e-21		CDC42	3.67e-28	0.261696	0.767	0.499	8.34e-24		ARF1	4.63824e-19	0.168666	0.582	0.402	1.05487e-14		PKP1	5.23855e-26	0.268899	0.133	0.025	1.1914e-21		LRPAP1	2.2e-17	0.118128	0.311	0.199	5.01e-13		HES1	3.75e-32	0.222143	0.233	0.085	8.53e-28
LCP1	1.17e-07	0.161648	0.489	0.392	0.00266172		SH3TC1	6.84e-34	0.261693	0.268	0.094	1.56e-29		DCUN1D3	1.03e-21	0.168646	0.119	0.031	2.34253e-17		NECAP2	4.15811e-40	0.268527	0.332	0.108	9.45679e-36		NTAN1	6.4e-22	0.118118	0.226	0.121	1.46e-17		ARPC1B	5.78e-21	0.221804	0.765	0.539	1.32e-16
VMP1	3.9e-25	0.161308	0.511	0.314	8.88e-21		SNX2	5.25e-44	0.261406	0.406	0.162	1.19e-39		RAB1B	8.06547e-25	0.168568	0.311	0.153	1.83433e-20		RTCB	6.55682e-39	0.268487	0.386	0.146	1.49122e-34		GNA13	4.4e-13	0.117954	0.394	0.284	1e-08		PSMC1	1.59e-30	0.221347	0.396	0.202	3.6e-26
EI24	5.87e-17	0.161017	0.226	0.118	1.33e-12		IER5	8.65e-34	0.261194	0.485	0.246	1.97e-29		FAM20A	1.41348e-18	0.16852	0.126	0.042	3.21468e-14		VPS9D1	5.12229e-39	0.268233	0.201	0.038	1.16496e-34		FAM20A	1.43e-12	0.117696	0.126	0.068	3.24e-08		PYGL	8.86e-44	0.220985	0.198	0.049	2.02e-39
FSTL3	5.75e-22	0.160852	0.131	0.04	1.31e-17		CARD16	3.36e-30	0.260517	0.477	0.244	7.63e-26		ARHGEF10L	1.60582e-24	0.168271	0.111	0.022	3.65212e-20		FKBP1A	5.23032e-41	0.268048	0.699	0.384	1.18953e-36		PHLDA3	4.04e-18	0.117605	0.127	0.057	9.19e-14		NCOR2	3.51e-33	0.220865	0.394	0.189	7.99e-29
RND3	2.27e-18	0.160635	0.168	0.071	5.16e-14		AEBP1	5.93e-23	0.2605	0.216	0.087	1.35e-18		NAGA	1.69629e-29	0.168222	0.155	0.039	3.85788e-25		MYO1B	8.1254e-26	0.267748	0.223	0.077	1.84796e-21		ASAP1	7.89e-22	0.117384	0.238	0.13	1.79e-17		FLNB	5.06e-26	0.220785	0.209	0.083	1.15e-21
NIBAN2	8.03e-34	0.160469	0.231	0.08	1.83e-29		CFH	3.66e-32	0.260135	0.234	0.078	8.32e-28		PDE4DIP	1.607e-28	0.167996	0.275	0.119	3.65481e-24		CDC42SE1	1.24392e-30	0.267715	0.54	0.267	2.82905e-26		TMEM106C	6.01e-11	0.117047	0.148	0.089	1.37e-06		UCP2	5.78e-15	0.22075	0.51	0.343	1.31e-10
ATP6V1D	4.91e-25	0.160042	0.242	0.105	1.12e-20		ADPRH	1.11e-28	0.260086	0.137	0.027	2.52e-24		ITGA3	2.01988e-18	0.167598	0.133	0.047	4.59382e-14		ACSL4	1.1546e-41	0.267565	0.358	0.122	2.6259e-37		SEM1	2.08e-13	0.116784	0.641	0.516	4.73e-09		CARM1	4.14e-40	0.220725	0.249	0.082	9.41e-36
IL18	5.83e-24	0.159813	0.122	0.029	1.33e-19		DOK2	2e-28	0.259921	0.231	0.083	4.54e-24		MICAL1	7.85981e-20	0.167493	0.237	0.115	1.78756e-15		AHNAK2	6.61274e-29	0.267419	0.124	0.017	1.50394e-24		JPT1	5.07e-13	0.116774	0.519	0.399	1.15e-08		RHOU	8e-27	0.220645	0.156	0.049	1.82e-22
AGPAT2	5.42e-27	0.159262	0.222	0.089	1.23e-22		ASAP1	3.11e-43	0.259672	0.295	0.094	7.08e-39		EHD1	1.23292e-16	0.167307	0.22	0.111	2.80403e-12		DKK1	5.27621e-33	0.267233	0.114	0.007	1.19997e-28		COX7B	1.5e-13	0.116763	0.654	0.518	3.4e-09		TMEM219	1.12e-21	0.220333	0.541	0.334	2.55e-17
MPZL1	7.58e-25	0.15925	0.197	0.077	1.72e-20		IL17RA	1.06e-40	0.259554	0.295	0.097	2.41e-36		MYO1F	9.78791e-17	0.167252	0.191	0.091	2.22606e-12		HSP90AA1	7.82596e-23	0.267217	0.881	0.716	1.77986e-18		KIF13A	9.91e-22	0.116745	0.149	0.065	2.25e-17		AGTRAP	2.33e-34	0.219943	0.322	0.139	5.3e-30
MYDGF	1.1e-24	0.15893	0.384	0.218	2.5e-20		CHMP5	2.73e-34	0.258876	0.535	0.281	6.21e-30		MRPL18	8.72804e-25	0.166597	0.261	0.119	1.98502e-20		CH25H	1.60994e-20	0.267076	0.256	0.11	3.66148e-16		ARPIN	1.41e-19	0.116633	0.128	0.054	3.2e-15		ACTA2	4.41e-13	0.219611	0.121	0.053	1e-08
ATP6AP2	9.83e-27	0.158837	0.402	0.22	2.24e-22		SEPTIN10	4.17e-36	0.256864	0.209	0.056	9.48e-32		IFNAR1	1.19031e-23	0.166584	0.28	0.136	2.70713e-19		RPN2	3.76317e-22	0.26691	0.514	0.291	8.55858e-18		SYNGR2	2.23e-13	0.116584	0.426	0.315	5.07e-09		BCL2L1	5.35e-36	0.219171	0.333	0.143	1.22e-31
IVNS1ABP	2.13e-12	0.158654	0.435	0.3	4.85e-08		DPH3	4.49e-44	0.25674	0.326	0.11	1.02e-39		IFI35	1.85402e-19	0.166434	0.516	0.334	4.21661e-15		CD72	4.60535e-24	0.266743	0.19	0.059	1.0474e-19		NCOA4	6e-21	0.11655	0.34	0.212	1.36e-16		DSC2	1.47e-39	0.219142	0.179	0.043	3.34e-35
SPAG9	6.82e-22	0.158643	0.326	0.176	1.55e-17		ATP6V1E1	4.21e-42	0.256424	0.361	0.139	9.57e-38		NBN	1.53926e-20	0.166388	0.276	0.14	3.50075e-16		SH3TC1	2.30877e-32	0.266455	0.283	0.094	5.25083e-28		FBN1	1.5e-14	0.116316	0.136	0.07	3.41e-10		BNC1	1.04e-39	0.219137	0.124	0.017	2.37e-35
MRPL18	2.47e-23	0.158564	0.253	0.119	5.61e-19		DNAJB6	1.18e-24	0.256384	0.601	0.366	2.69e-20		MFSD12	4.73901e-33	0.166266	0.275	0.11	1.07779e-28		IL15	4.55702e-42	0.266036	0.238	0.052	1.0364e-37		TIMM13	2.66e-18	0.116302	0.288	0.179	6.05e-14		GALNT6	1.59e-51	0.218942	0.253	0.065	3.61e-47
MYL12A	1.23e-09	0.158546	0.855	0.729	2.81e-05		ADIPOR1	4.84e-40	0.256211	0.382	0.158	1.1e-35		PDIA6	2.99539e-18	0.166234	0.442	0.286	6.81242e-14		TMX1	2.27498e-35	0.265897	0.388	0.156	5.17398e-31		EDEM2	2.93e-21	0.116189	0.175	0.084	6.66e-17		RAB8A	1.52e-32	0.218927	0.388	0.187	3.45e-28
RAB2A	5.22e-18	0.158231	0.429	0.272	1.19e-13		CCT5	6.63e-28	0.256182	0.414	0.218	1.51e-23		AP1S2	1.19531e-12	0.16605	0.212	0.121	2.71849e-08		DYNLT1	2.30136e-20	0.265237	0.698	0.451	5.23399e-16		ROMO1	1.93e-16	0.116144	0.635	0.499	4.4e-12		ABHD5	4.45e-18	0.21853	0.297	0.161	1.01e-13
SERPINB1	6.74e-19	0.158221	0.442	0.278	1.53e-14		FAM20C	1.2e-35	0.256098	0.183	0.041	2.72e-31		TMEM219	9.19704e-22	0.165977	0.466	0.281	2.09168e-17		YWHAE	8.70978e-27	0.265079	0.569	0.313	1.98087e-22		MYD88	3.11e-14	0.116142	0.227	0.141	7.07e-10		PSMA3	6.6e-23	0.218499	0.481	0.291	1.5e-18
TUT7	6.74e-23	0.158052	0.218	0.095	1.53e-18		VPS9D1	2.27e-36	0.255943	0.181	0.038	5.15e-32		NIBAN2	1.94066e-35	0.165069	0.239	0.08	4.41363e-31		NFIC	1.30287e-36	0.265038	0.316	0.105	2.96311e-32		OLFML3	4.04e-16	0.115585	0.118	0.054	9.18e-12		COL7A1	7.86e-32	0.218386	0.198	0.064	1.79e-27
CCT5	3.33e-19	0.157516	0.364	0.218	7.57e-15		LINC01094	7.88e-31	0.255785	0.108	0.009	1.79e-26		OSTC	6.7283e-14	0.164991	0.403	0.266	1.53022e-09		CFLAR	1.39961e-16	0.265032	0.716	0.482	3.18313e-12		TMEM51	3.32e-23	0.115424	0.144	0.059	7.54e-19		LIPA	2.76e-34	0.218128	0.323	0.138	6.28e-30
RABGEF1	5.87e-19	0.157479	0.174	0.074	1.33e-14		GRK3	6.57e-33	0.255762	0.188	0.049	1.49e-28		HM13	6.53647e-21	0.164765	0.442	0.269	1.48659e-16		CARM1	1.12082e-45	0.264902	0.249	0.052	2.54907e-41		CIAO2A	5.51e-20	0.115335	0.399	0.266	1.25e-15		RHEB	2.18e-23	0.217942	0.534	0.325	4.95e-19
SBF2	1.87e-26	0.157471	0.184	0.064	4.25e-22		IRF2BP2	2.47e-35	0.254815	0.489	0.241	5.61e-31		SNAI2	2.72465e-21	0.164109	0.142	0.047	6.19667e-17		ACTA2	1.53459e-16	0.264247	0.121	0.036	3.49013e-12		MAP2K3	7.25e-14	0.115304	0.309	0.208	1.65e-09		DPYD	5.43e-35	0.217837	0.356	0.157	1.23e-30
HSD17B4	3.32e-21	0.157465	0.166	0.064	7.55e-17		NR4A1	1.71e-39	0.254786	0.576	0.304	3.88e-35		DNASE2	1.52357e-26	0.164069	0.182	0.062	3.46506e-22		SHTN1	6.72742e-38	0.264239	0.166	0.023	1.53002e-33		NQO2	2.56e-24	0.115227	0.275	0.153	5.83e-20		RPN1	4.28e-25	0.21749	0.488	0.287	9.74e-21
RRAGD	1.84e-18	0.157359	0.102	0.028	4.18e-14		ANAPC11	4.28e-30	0.25451	0.585	0.34	9.74e-26		PRRX1	1.70053e-10	0.163911	0.115	0.056	3.86751e-06		ANKRD9	1.9455e-43	0.263754	0.295	0.08	4.42465e-39		IVNS1ABP	3.71e-09	0.11511	0.441	0.337	8.43e-05		SAMD4A	6.99e-32	0.217443	0.228	0.082	1.59e-27
OAS1	9.15e-20	0.157334	0.372	0.219	2.08e-15		CTNND1	2.53e-52	0.254385	0.302	0.083	5.76e-48		IVNS1ABP	1.04568e-12	0.163799	0.441	0.3	2.37819e-08		ARHGEF11	7.86868e-39	0.263603	0.16	0.019	1.78957e-34		BID	1.93e-16	0.115078	0.253	0.155	4.39e-12		NT5E	9.72e-23	0.217402	0.208	0.089	2.21e-18
VAMP3	3.1e-29	0.157065	0.265	0.113	7.04e-25		PLBD2	5.15e-44	0.254096	0.213	0.044	1.17e-39		WIPI1	2.44325e-22	0.163633	0.159	0.056	5.55669e-18		PNPLA6	1.43236e-36	0.26357	0.282	0.086	3.25761e-32		PRXL2A	3.94e-18	0.114911	0.121	0.053	8.95e-14		HCAR3	1.25e-32	0.217085	0.115	0.02	2.84e-28
SH3TC1	3.78e-20	0.15697	0.208	0.094	8.6e-16		STAT6	5.07e-36	0.253897	0.344	0.139	1.15e-31		HSPA5	1.20471e-14	0.16342	0.507	0.359	2.73987e-10		LIPA	8.3196e-40	0.263486	0.323	0.105	1.89213e-35		NPL	7.88e-19	0.114844	0.109	0.043	1.79e-14		SORT1	1.2e-34	0.216955	0.169	0.045	2.74e-30
MAPK13	2.33e-18	0.156945	0.116	0.037	5.29e-14		LGALS2	1.57e-25	0.253609	0.107	0.016	3.56e-21		ITGB1	3.28475e-15	0.163291	0.53	0.369	7.47051e-11		PDE4DIP	2.28319e-40	0.263253	0.352	0.119	5.19267e-36		MOB3B	1.94e-20	0.114636	0.135	0.058	4.41e-16		ADPGK	1.26e-31	0.216826	0.414	0.206	2.86e-27
EPN1	9.07e-26	0.156927	0.235	0.099	2.06e-21		AZIN1	3.9e-37	0.253589	0.409	0.182	8.87e-33		PLEKHG2	1.49446e-18	0.162948	0.227	0.112	3.39886e-14		P2RX7	1.64542e-28	0.262599	0.119	0.015	3.74219e-24		NIBAN2	9.54e-27	0.114604	0.239	0.121	2.17e-22		COX8A	5.48e-22	0.216787	0.791	0.61	1.25e-17
ITGB7	8.88e-16	0.156536	0.164	0.076	2.02e-11		UQCR10	1.29e-29	0.253368	0.742	0.504	2.93e-25		AGPAT2	4.6654e-28	0.162935	0.228	0.089	1.06105e-23		PLEKHA7	1.33407e-27	0.262521	0.128	0.02	3.03408e-23		KCNMA1	9.1e-23	0.1145	0.159	0.07	2.07e-18		ANO6	2.43e-32	0.216523	0.325	0.142	5.53e-28
CCDC80	1.9e-16	0.156233	0.112	0.039	4.31e-12		ABR	6.95e-37	0.253191	0.256	0.082	1.58e-32		MLF2	9.37036e-23	0.162728	0.417	0.247	2.1311e-18		ATP6V0E1	4.86725e-22	0.262412	0.714	0.457	1.10696e-17		IL15	3.73e-19	0.114499	0.158	0.077	8.48e-15		MCEMP1	1.3e-17	0.216507	0.101	0.031	2.95e-13
WIPI1	2.13e-21	0.155938	0.154	0.056	4.85e-17		CMTM6	2.03e-39	0.253142	0.57	0.294	4.62e-35		CMIP	2.44263e-25	0.162335	0.356	0.185	5.55528e-21		SORT1	3.94265e-39	0.262344	0.169	0.023	8.96677e-35		PRDX5	8.63e-15	0.114382	0.547	0.42	1.96e-10		AZIN1	1.26e-29	0.216391	0.432	0.224	2.87e-25
ERGIC3	1.14e-23	0.155925	0.341	0.184	2.59e-19		SLC36A1	4.68e-34	0.25298	0.163	0.033	1.06e-29		PML	4.64466e-26	0.162305	0.325	0.16	1.05634e-21		VAMP3	8.48499e-48	0.262261	0.364	0.113	1.92974e-43		COLEC12	6.21e-10	0.114328	0.1	0.054	1.41e-05		IRF5	2.31e-20	0.216374	0.146	0.053	5.25e-16
SDSL	9.22e-25	0.155914	0.109	0.021	2.1e-20		RHEB	6.37e-35	0.252967	0.518	0.269	1.45e-30		PIK3R5	4.77447e-14	0.161887	0.176	0.088	1.08586e-09		PFN1	2.35348e-32	0.262172	0.938	0.802	5.35253e-28		UBA6	8.54e-21	0.114323	0.224	0.122	1.94e-16		UBE2E2	3.79e-36	0.216361	0.249	0.089	8.61e-32
N4BP2L1	6.9e-13	0.155687	0.194	0.106	1.57e-08		MICOS10	1.31e-27	0.252966	0.616	0.383	2.99e-23		LMAN1	3.85722e-14	0.161805	0.355	0.228	8.77247e-10		TMBIM6	7.9022e-20	0.262115	0.753	0.516	1.7972e-15		TMEM127	1.86e-26	0.114175	0.225	0.11	4.22e-22		CMIP	4.39e-28	0.216359	0.455	0.245	9.99e-24
TNFSF12	1.61e-18	0.155603	0.241	0.124	3.66e-14		ABHD5	7.11e-23	0.252116	0.287	0.135	1.62e-18		LCP1	4.1244e-07	0.16166	0.486	0.392	0.00938012		ANAPC11	3.70883e-25	0.261878	0.593	0.34	8.435e-21		P4HA1	6.99e-19	0.113944	0.207	0.113	1.59e-14		TRIP6	1.88e-37	0.216307	0.255	0.092	4.27e-33
PLBD2	4.99e-28	0.155557	0.158	0.044	1.14e-23		BEST1	3.7e-24	0.251893	0.202	0.076	8.41e-20		PTPA	2.84637e-26	0.161488	0.248	0.106	6.47351e-22		CYFIP1	4.69522e-49	0.261797	0.301	0.074	1.06783e-44		OAZ2	1.98e-19	0.113832	0.236	0.135	4.51e-15		ATP6V1G1	5.51e-17	0.216249	0.737	0.546	1.25e-12
HSPA5	2.84e-14	0.155397	0.503	0.359	6.45e-10		TMEM106A	5.5e-32	0.251678	0.146	0.026	1.25e-27		ARHGAP10	2.48389e-29	0.16147	0.149	0.035	5.64912e-25		PLBD2	8.07686e-42	0.261359	0.221	0.044	1.83692e-37		WASL	7.1e-21	0.113737	0.184	0.092	1.61e-16		SPINT1	5.45e-36	0.216134	0.18	0.048	1.24e-31
TWF2	1.8e-25	0.155351	0.286	0.135	4.1e-21		INSIG1	9.43e-23	0.25106	0.326	0.162	2.15e-18		DBNDD2	2.53379e-35	0.161399	0.282	0.108	5.7626e-31		AL138963.4	2.91568e-26	0.261264	0.252	0.093	6.63114e-22		AP1S2	4.83e-10	0.113294	0.212	0.143	1.1e-05		EFNB1	5.88e-34	0.216099	0.161	0.041	1.34e-29
PSMD1	6.96e-23	0.155315	0.289	0.147	1.58e-18		SLC22A18	3.6e-35	0.250303	0.216	0.06	8.2e-31		SLC39A1	2.73946e-24	0.161214	0.221	0.092	6.23035e-20		KDELR2	1.88342e-23	0.261254	0.479	0.268	4.28345e-19		PLBD2	3.03e-23	0.113293	0.164	0.073	6.9e-19		LACC1	2.34e-35	0.215942	0.176	0.047	5.32e-31
CTNNAL1	1.28e-13	0.155163	0.122	0.053	2.9e-09		CYFIP1	1.62e-48	0.250281	0.278	0.074	3.69e-44		SLC36A1	1.23052e-21	0.161194	0.121	0.033	2.79858e-17		ABR	1.00396e-34	0.260842	0.267	0.082	2.28331e-30		EIF4E2	1.23e-15	0.113274	0.282	0.18	2.81e-11		SUCNR1	3.84e-27	0.215916	0.104	0.02	8.74e-23
RAB8A	1.42e-26	0.15509	0.295	0.139	3.23e-22		CD36	1.76e-31	0.250124	0.132	0.019	4e-27		S100A13	6.57988e-21	0.161191	0.272	0.139	1.49646e-16		IL17RA	1.17262e-39	0.260426	0.314	0.097	2.6669e-35		ABCD1	8.89e-17	0.113242	0.12	0.054	2.02e-12		PATL1	3.55e-29	0.21576	0.299	0.134	8.08e-25
SNX2	7.93e-26	0.154886	0.324	0.162	1.8e-21		RABGEF1	9.19e-32	0.249844	0.227	0.074	2.09e-27		GRK3	3.89148e-19	0.16115	0.138	0.049	8.8504e-15		RCC2	6.99627e-43	0.26033	0.301	0.086	1.59116e-38		PDE4DIP	7.36e-20	0.11324	0.275	0.163	1.67e-15		SLC16A3	1.47e-26	0.215752	0.412	0.217	3.34e-22
PRRX1	6.02e-10	0.154597	0.112	0.056	1.37e-05		FCGR1B	2.41e-30	0.249515	0.114	0.012	5.48e-26		ATP13A2	9.94664e-23	0.161087	0.162	0.056	2.26216e-18		DYSF	1.37825e-26	0.260307	0.145	0.03	3.13456e-22		PSMD1	4.59e-18	0.113199	0.296	0.184	1.04e-13		CES2	3.39e-27	0.215537	0.185	0.065	7.71e-23
CNN3	4.52e-15	0.154078	0.201	0.105	1.03e-10		RTCB	2.06e-40	0.249173	0.365	0.146	4.68e-36		ATP5PB	2.12086e-20	0.160931	0.463	0.281	4.82347e-16		DSG3	2.24431e-30	0.26007	0.128	0.016	5.10424e-26		MTCH2	6.57e-19	0.113051	0.289	0.178	1.49e-14		RAPGEF1	2.16e-23	0.215534	0.44	0.248	4.92e-19
ASAP1	3.32e-27	0.154034	0.231	0.094	7.55e-23		RPN2	9.05e-25	0.248898	0.502	0.291	2.06e-20		ASAP1	1.3328e-28	0.160897	0.238	0.094	3.03118e-24		AKR1A1	2.05387e-37	0.259891	0.478	0.21	4.67112e-33		ATP6V1C1	5.89e-22	0.112585	0.235	0.128	1.34e-17		RPN2	1.79e-17	0.21539	0.514	0.338	4.06e-13
ITGB1	1.59e-14	0.154015	0.525	0.369	3.61e-10		DYSF	5.13e-27	0.248647	0.137	0.03	1.17e-22		ILK	4.35631e-32	0.160885	0.316	0.139	9.90755e-28		CCNB1	6.5733e-24	0.25954	0.136	0.03	1.49497e-19		LACC1	1.52e-23	0.11256	0.127	0.047	3.46e-19		SLCO1B3	3.57e-38	0.214933	0.108	0.012	8.13e-34
OSTC	1.9e-13	0.153976	0.399	0.266	4.32e-09		SAV1	1.23e-36	0.248379	0.279	0.096	2.79e-32		MRPL52	1.82749e-21	0.160809	0.472	0.293	4.15627e-17		UBE2Z	8.41704e-41	0.259386	0.389	0.142	1.91429e-36		PLXNC1	3.7e-14	0.112539	0.155	0.086	8.41e-10		IDH1	8.53e-35	0.214851	0.241	0.086	1.94e-30
ATP13A2	5.22e-21	0.153538	0.155	0.056	1.19e-16		KCNMB1	9.46e-29	0.248228	0.115	0.015	2.15e-24		PLBD2	1.39864e-29	0.160736	0.164	0.044	3.18093e-25		S100A4	2.2167e-38	0.259302	0.806	0.472	5.04145e-34		CARM1	1.58e-21	0.11239	0.172	0.082	3.59e-17		UBE2Z	7.49e-32	0.214612	0.389	0.189	1.7e-27
ATP5MF	1.47e-18	0.153516	0.595	0.417	3.34e-14		SLC2A1	5.24e-19	0.2482	0.155	0.058	1.19e-14		LRRC59	1.60703e-22	0.160709	0.297	0.154	3.65488e-18		SLC44A1	6.77287e-36	0.259126	0.277	0.087	1.54035e-31		SASH1	3.26e-15	0.112287	0.151	0.081	7.41e-11		FOSB	1.77e-21	0.21444	0.77	0.544	4.02e-17
IL17RA	1.99e-23	0.153444	0.224	0.097	4.53e-19		STX7	9.88e-42	0.248139	0.29	0.093	2.25e-37		PSMD1	5.59503e-24	0.160514	0.296	0.147	1.27248e-19		CD300C	3.4628e-30	0.259053	0.119	0.012	7.87546e-26		P4HA2	3e-22	0.112251	0.157	0.07	6.82e-18		PDLIM1	7.19e-13	0.214266	0.255	0.158	1.64e-08
GNPTG	1.14e-25	0.153395	0.281	0.133	2.6e-21		GIMAP4	1.81e-21	0.247724	0.273	0.13	4.12e-17		RCC2	1.60165e-27	0.160339	0.223	0.086	3.64262e-23		NUMB	9.27959e-36	0.258917	0.327	0.115	2.11046e-31		AZIN1	2.02e-16	0.11221	0.34	0.224	4.59e-12		S100A13	3.41e-28	0.214167	0.334	0.159	7.76e-24
SLC2A1	9.15e-11	0.152841	0.118	0.058	2.08e-06		PCOLCE	1.42e-11	0.247245	0.12	0.053	3.23e-07		VMP1	2.74362e-25	0.160121	0.518	0.314	6.23982e-21		IRF5	7.45814e-25	0.258586	0.146	0.033	1.69621e-20		F11R	4.94e-19	0.112086	0.187	0.098	1.12e-14		PLBD2	3.14e-35	0.213916	0.221	0.073	7.14e-31
RDX	4.92e-23	0.152795	0.218	0.096	1.12e-18		RCC2	5.47e-42	0.247234	0.278	0.086	1.24e-37		AP2A2	8.25853e-26	0.159792	0.185	0.064	1.87824e-21		WDR45B	5.33611e-35	0.258372	0.345	0.126	1.21359e-30		CKAP5	7.09e-17	0.111923	0.19	0.105	1.61e-12		VPS9D1	1.78e-35	0.213445	0.201	0.06	4.06e-31
ACTG1	2.7e-09	0.152747	0.828	0.706	6.14e-05		PDLIM5	1.93e-35	0.246771	0.318	0.126	4.39e-31		CLCN7	8.64103e-22	0.159633	0.188	0.076	1.96523e-17		MPZL1	1.00919e-36	0.258088	0.263	0.077	2.2952e-32		RBM42	1.41e-22	0.111922	0.249	0.137	3.2e-18		ENPP2	2.81e-24	0.212988	0.153	0.051	6.38e-20
DOK2	1.34e-15	0.152476	0.175	0.083	3.05e-11		MESD	4.8e-33	0.24664	0.414	0.201	1.09e-28		EGFR	1.50254e-20	0.159098	0.116	0.032	3.41723e-16		RAB2A	1.28649e-23	0.257671	0.493	0.272	2.92587e-19		TMEM219	1.77e-15	0.11181	0.466	0.334	4.04e-11		ATP6AP2	3.96e-29	0.212854	0.503	0.277	9.02e-25
ILK	1.21e-30	0.152282	0.308	0.139	2.74e-26		CALM3	8.62e-33	0.246245	0.548	0.295	1.96e-28		ARPIN	1.38413e-24	0.158808	0.128	0.031	3.14792e-20		MICAL1	1.62468e-26	0.257615	0.29	0.115	3.69501e-22		LTB4R	6.35e-17	0.11167	0.101	0.041	1.45e-12		SRGN	4.79e-08	0.212369	0.844	0.768	0.0010899
TRIP6	1.12e-26	0.152118	0.187	0.066	2.55e-22		PML	1.97e-36	0.245871	0.375	0.16	4.47e-32		MAPK13	6.84253e-19	0.158765	0.119	0.037	1.5562e-14		DPYD	2.68041e-40	0.257564	0.356	0.121	6.09606e-36		CAPNS1	6.51e-16	0.111384	0.473	0.34	1.48e-11		RREB1	4.85e-36	0.212354	0.263	0.096	1.1e-31
ATP5F1E	2.57e-12	0.152099	0.908	0.807	5.85e-08		NT5C2	1.9e-35	0.245796	0.236	0.072	4.32e-31		RABGEF1	1.2469e-19	0.158532	0.178	0.074	2.83583e-15		LRPAP1	2.55474e-32	0.256956	0.369	0.151	5.81023e-28		ATP5PD	1.86e-14	0.11138	0.565	0.426	4.23e-10		STX6	2.85e-35	0.212351	0.249	0.088	6.48e-31
FBP1	4.42e-15	0.151776	0.101	0.034	1.01e-10		MAP7D1	4.64e-39	0.243843	0.367	0.152	1.06e-34		DNAJB6	1.58649e-16	0.158521	0.546	0.366	3.60815e-12		ASCL2	9.43685e-41	0.256128	0.167	0.019	2.14622e-36		ATP6V0A1	1.77e-14	0.111328	0.157	0.086	4.02e-10		IGFBP6	2.85e-29	0.212165	0.145	0.04	6.49e-25
ARPIN	2.94e-23	0.151714	0.122	0.031	6.68e-19		RAP1A	3.01e-30	0.243819	0.575	0.323	6.84e-26		GOLIM4	1.16767e-27	0.158377	0.185	0.062	2.65563e-23		CDC42	4.85758e-22	0.255802	0.776	0.499	1.10476e-17		ACSL3	3.1e-21	0.111222	0.268	0.155	7.05e-17		DYSF	3.28e-22	0.211784	0.145	0.049	7.45e-18
DENND3	1.87e-19	0.151637	0.209	0.098	4.26e-15		HAPLN3	4.64e-35	0.243718	0.278	0.099	1.06e-30		SH3GL1	5.25886e-23	0.158328	0.19	0.075	1.19602e-18		STX6	9.86138e-38	0.255645	0.249	0.065	2.24277e-33		AGPAT2	1.68e-20	0.111085	0.228	0.126	3.83e-16		IER2	2.57e-19	0.211079	0.721	0.515	5.85e-15
RGS10	1.39e-18	0.151502	0.436	0.27	3.15e-14		CEP68	1.04e-23	0.243629	0.169	0.056	2.36e-19		LPCAT2	3.31333e-28	0.158241	0.167	0.049	7.5355e-24		TGM2	1.6452e-48	0.255421	0.295	0.072	3.74168e-44		MCTP1	9.83e-14	0.110991	0.12	0.061	2.24e-09		NECAP2	6.45e-32	0.210904	0.332	0.149	1.47e-27
SLC22A18	7.13e-22	0.151414	0.164	0.06	1.62e-17		SLIRP	5.28e-33	0.243499	0.536	0.296	1.2e-28		CCN2	1.57204e-13	0.157911	0.156	0.075	3.57529e-09		TWF2	1.38013e-33	0.255337	0.352	0.135	3.13882e-29		BCL2L1	3.52e-23	0.110868	0.258	0.143	8.01e-19		RALB	1.19e-36	0.210319	0.277	0.104	2.71e-32
LRRC59	1.71e-21	0.151395	0.291	0.154	3.9e-17		FES	1.13e-32	0.243399	0.183	0.046	2.58e-28		HSP90AA1	3.90329e-16	0.157749	0.835	0.716	8.87725e-12		TNFRSF10B	2.49416e-27	0.255286	0.238	0.08	5.67246e-23		LAMA4	5.73e-07	0.110815	0.117	0.077	0.0130377		SLC12A7	3.4e-30	0.210187	0.213	0.076	7.73e-26
FAM49B	5.54e-18	0.151324	0.472	0.304	1.26e-13		MPZL1	9.3e-37	0.243328	0.245	0.077	2.12e-32		FAT1	3.97421e-21	0.157743	0.136	0.044	9.03855e-17		STX7	7.04968e-41	0.254931	0.309	0.093	1.60331e-36		CSRP2	1.25e-18	0.11066	0.145	0.068	2.84e-14		SLC11A2	2.12e-28	0.209945	0.258	0.109	4.82e-24
SLC39A1	5.64e-23	0.151179	0.214	0.092	1.28e-18		PTGFRN	1e-33	0.242739	0.172	0.038	2.28e-29		SDSL	2.96806e-26	0.157526	0.115	0.021	6.75026e-22		ATP1B1	2.39923e-34	0.254776	0.256	0.076	5.45656e-30		YIF1A	2.92e-15	0.110594	0.306	0.203	6.64e-11		CBR1	9.98e-40	0.209678	0.341	0.14	2.27e-35
RCC2	9.33e-26	0.150981	0.214	0.086	2.12e-21		SIRPB1	1.85e-34	0.242582	0.133	0.016	4.21e-30		TCIM	6.92708e-09	0.157329	0.117	0.061	0.000157543		IGFBP4	2.36894e-26	0.254646	0.294	0.117	5.38768e-22		SH3GLB1	4.35e-17	0.110555	0.45	0.313	9.9e-13		CTDNEP1	2.15e-27	0.209654	0.474	0.265	4.89e-23
CARM1	2.01e-26	0.150674	0.166	0.052	4.56e-22		FOSL2	4.19e-21	0.242293	0.586	0.366	9.53e-17		LMNA	4.92742e-15	0.15723	0.554	0.399	1.12064e-10		RHEB	9.32653e-31	0.254541	0.534	0.269	2.12113e-26		NR4A1	1.04e-15	0.110444	0.491	0.358	2.37e-11		SNAI2	8.55e-29	0.209389	0.182	0.061	1.94e-24
TMCO1	1.2e-21	0.150667	0.346	0.19	2.73e-17		CD300C	5.65e-29	0.241883	0.11	0.012	1.28e-24		MAPK6	1.24329e-24	0.157025	0.237	0.103	2.82761e-20		CBR1	8.87523e-48	0.254415	0.341	0.099	2.01849e-43		HAPLN3	3.11e-17	0.110417	0.238	0.14	7.07e-13		COL12A1	7.64e-23	0.209268	0.177	0.068	1.74e-18
SERPINB9	4.25e-13	0.150475	0.437	0.3	9.67e-09		SPAG9	1.19e-34	0.241774	0.392	0.176	2.71e-30		CARM1	8.77082e-28	0.156567	0.172	0.052	1.99475e-23		GSAP	2.01292e-34	0.253992	0.232	0.062	4.57798e-30		PPP1R12C	2.12e-13	0.110382	0.196	0.119	4.82e-09		FCHO2	1.48e-26	0.208837	0.145	0.043	3.36e-22
MIIP	1.36e-23	0.150274	0.222	0.096	3.09e-19		NR1H3	2.1e-25	0.241733	0.109	0.017	4.77e-21		MMP2	3.24391e-13	0.156502	0.135	0.062	7.37761e-09		HMGA1	2.53087e-27	0.253953	0.367	0.167	5.75596e-23		CSNK1A1	6.41e-14	0.110268	0.479	0.353	1.46e-09		PCDH7	1.03e-33	0.208511	0.143	0.033	2.33e-29
TBC1D14	1.66e-20	0.150038	0.174	0.07	3.78e-16		NMI	4.88e-41	0.241499	0.379	0.151	1.11e-36		UQCR10	1.72609e-18	0.156472	0.686	0.504	3.92564e-14		DSC2	2.96823e-34	0.2539	0.179	0.034	6.75064e-30		MRPL37	7.76e-20	0.110045	0.242	0.139	1.77e-15		MSRB2	1.6e-40	0.208499	0.308	0.116	3.63e-36
KLF10	7.24e-24	0.149905	0.279	0.135	1.65e-19		MYL9	5.18e-24	0.241333	0.205	0.077	1.18e-19		WASL	3.9956e-24	0.156375	0.184	0.067	9.08719e-20		ATP6V1E1	4.9313e-40	0.253688	0.381	0.139	1.12153e-35		FAM120A	6.07e-17	0.109986	0.323	0.207	1.38e-12		PDE4DIP	2.84e-31	0.208497	0.352	0.163	6.45e-27
NUMB	4.85e-22	0.149889	0.244	0.115	1.1e-17		FKBP1A	1.06e-46	0.241108	0.682	0.384	2.42e-42		BEX3	8.0712e-20	0.156128	0.254	0.129	1.83563e-15		NCSTN	1.32483e-34	0.253647	0.288	0.094	3.01305e-30		CTDNEP1	1.28e-19	0.109963	0.401	0.265	2.91e-15		S100A16	7.07e-17	0.208238	0.235	0.127	1.61e-12
WASL	2.6e-22	0.149863	0.176	0.067	5.92e-18		IFITM2	8.19e-16	0.241017	0.849	0.634	1.86e-11		MTCH2	1.79871e-25	0.155958	0.289	0.137	4.09081e-21		NCF4	5.76432e-24	0.253395	0.28	0.115	1.31098e-19		NUP62	6.65e-21	0.109622	0.194	0.098	1.51e-16		ANKRD9	1.25e-32	0.208023	0.295	0.123	2.85e-28
VPS9D1	1.51e-21	0.149861	0.129	0.038	3.45e-17		KIF1B	1.08e-38	0.240923	0.267	0.085	2.45e-34		ERGIC3	1.55927e-23	0.155625	0.343	0.184	3.54624e-19		NDUFB1	1.1067e-26	0.252965	0.563	0.305	2.51696e-22		CFLAR	2.24e-06	0.109369	0.655	0.549	0.0508352		FKBP1A	2.83e-29	0.207913	0.699	0.466	6.44e-25
GOLIM4	7.99e-26	0.149719	0.177	0.062	1.82e-21		AL645608.7	1.8e-24	0.24082	0.106	0.017	4.1e-20		SH3TC1	3.0666e-20	0.155437	0.21	0.094	6.97436e-16		PLEK2	6.52915e-30	0.252795	0.155	0.03	1.48493e-25		MRPL13	1.45e-18	0.109152	0.285	0.179	3.3e-14		AHR	3.18e-31	0.207773	0.453	0.235	7.22e-27
PNPLA6	6.4e-22	0.149698	0.202	0.086	1.45e-17		MYO1E	6.36e-34	0.240446	0.272	0.099	1.45e-29		PTGFRN	3.94695e-23	0.155143	0.134	0.038	8.97655e-19		CHMP2A	1.01971e-33	0.252739	0.447	0.2	2.31913e-29		BCL7C	6.67e-16	0.109028	0.282	0.179	1.52e-11		COPS7A	1.1e-38	0.207494	0.265	0.094	2.51e-34
MTCH2	1.67e-24	0.149626	0.282	0.137	3.8e-20		RAB34	1.13e-45	0.24006	0.278	0.08	2.56e-41		TMX1	3.48879e-24	0.154932	0.311	0.156	7.93456e-20		KCNMB1	1.36605e-26	0.252618	0.115	0.015	3.10682e-22		LATS2	5.02e-18	0.108999	0.143	0.069	1.14e-13		IL1RAP	1.65e-32	0.207437	0.208	0.069	3.75e-28
SLIRP	7.52e-21	0.149615	0.47	0.296	1.71e-16		MRPL52	7.59e-31	0.239379	0.527	0.293	1.73e-26		EPN1	4.20629e-27	0.154873	0.242	0.099	9.56636e-23		TET2	4.76432e-31	0.252426	0.263	0.087	1.08355e-26		WDR45B	6.54e-19	0.108921	0.264	0.156	1.49e-14		CTBP2	1.65e-33	0.207272	0.236	0.085	3.76e-29
CSRP2	1.1e-19	0.149011	0.138	0.049	2.51e-15		CDC42SE1	4.97e-33	0.239146	0.518	0.267	1.13e-28		ADH5	2.39718e-22	0.154778	0.312	0.164	5.4519e-18		C9orf72	1.57421e-22	0.252002	0.273	0.114	3.58023e-18		PHACTR4	1.27e-16	0.108897	0.223	0.13	2.88e-12		STX7	1.26e-34	0.207073	0.309	0.126	2.87e-30
GPM6B	1.67e-11	0.148962	0.102	0.044	3.8e-07		CRISPLD2	1.6e-26	0.238376	0.165	0.047	3.63e-22		CSRP2	2.65262e-21	0.154671	0.145	0.049	6.03284e-17		ANGPTL4	1.11704e-26	0.251705	0.158	0.036	2.54049e-22		SDCBP	3.75e-13	0.108623	0.648	0.509	8.52e-09		RTCB	4.32e-31	0.206905	0.386	0.189	9.83e-27
GOLM1	2.6e-19	0.148837	0.147	0.056	5.91e-15		ITGA3	4.74e-25	0.238367	0.16	0.047	1.08e-20		EIF4A1	2.70015e-15	0.154509	0.761	0.607	6.14094e-11		PSMB3	1.44119e-24	0.251548	0.689	0.434	3.27771e-20		TM9SF2	3.01e-14	0.108547	0.415	0.297	6.83e-10		NAGA	5.73e-39	0.206816	0.226	0.07	1.3e-34
STAT6	1.37e-20	0.148666	0.272	0.139	3.13e-16		SORT1	2.05e-37	0.238329	0.154	0.023	4.66e-33		MIIP	2.35188e-24	0.154505	0.227	0.096	5.34889e-20		KIF13A	2.50503e-37	0.251162	0.215	0.049	5.6972e-33		ATP6V0E1	8.63e-12	0.108494	0.643	0.519	1.96e-07		PRKDC	1.98e-14	0.20674	0.349	0.222	4.51e-10
STAT5A	5.68e-18	0.14861	0.222	0.11	1.29e-13		HSD17B4	1.97e-34	0.238054	0.218	0.064	4.48e-30		NSFL1C	5.11073e-29	0.154173	0.223	0.083	1.16233e-24		MRPL52	1.98012e-28	0.250938	0.545	0.293	4.50338e-24		MAP4	1.17e-15	0.108375	0.322	0.216	2.67e-11		COL5A2	1.84e-15	0.20662	0.177	0.082	4.2e-11
SULF2	1.05e-23	0.148593	0.173	0.062	2.39e-19		ANKRD9	7.62e-45	0.237684	0.279	0.08	1.73e-40		MYD88	1.06369e-17	0.153876	0.227	0.114	2.41916e-13		AZIN1	1.56285e-35	0.250618	0.432	0.182	3.55438e-31		PSMB7	9.8e-16	0.108043	0.352	0.24	2.23e-11		VASH1	1.23e-21	0.206422	0.163	0.061	2.79e-17
RNH1	1.47e-23	0.148572	0.335	0.176	3.34e-19		AXL	6.77e-45	0.237319	0.203	0.037	1.54e-40		SBF2	2.44789e-27	0.153783	0.189	0.064	5.56724e-23		RBP1	1.04165e-25	0.250444	0.229	0.08	2.36902e-21		IGF2R	1.24e-23	0.108026	0.379	0.237	2.81e-19		FAM20C	1.71e-28	0.206389	0.185	0.062	3.89e-24
DYNC1I2	1.34e-19	0.14853	0.247	0.125	3.05e-15		KDELR2	1.1e-24	0.237123	0.461	0.268	2.5e-20		ATP5MF	2.04446e-18	0.153645	0.598	0.417	4.64971e-14		IVNS1ABP	3.05252e-21	0.250351	0.531	0.3	6.94235e-17		SYNCRIP	5.31e-16	0.107946	0.355	0.238	1.21e-11		PSMA4	5.73e-26	0.206269	0.543	0.327	1.3e-21
CLEC11A	6.75e-24	0.148491	0.145	0.044	1.54e-19		SULF2	1.23e-35	0.237031	0.219	0.062	2.81e-31		PSMA3	3.20405e-23	0.15362	0.43	0.248	7.28698e-19		RCN3	6.25161e-26	0.250335	0.187	0.054	1.4218e-21		DPH3	4.84e-22	0.107908	0.265	0.149	1.1e-17		BCAM	1.05e-27	0.206172	0.152	0.045	2.4e-23
LPCAT2	3.82e-26	0.148479	0.159	0.049	8.69e-22		HSP90AA1	4.86e-26	0.237017	0.873	0.716	1.1e-21		IFI6	2.05642e-13	0.153548	0.785	0.643	4.67692e-09		CCND1	5.44368e-30	0.250289	0.258	0.089	1.23806e-25		ATP6V1G1	5.37e-11	0.10785	0.673	0.546	1.22e-06		DSG2	9.27e-30	0.206047	0.146	0.039	2.11e-25
ARHGAP10	7.23e-27	0.148434	0.14	0.035	1.64e-22		SHTN1	5.92e-33	0.236976	0.142	0.023	1.35e-28		NCF4	9.83845e-15	0.153342	0.216	0.115	2.23756e-10		NFAM1	6.14588e-30	0.24998	0.101	0.006	1.39776e-25		MSRB1	6.1e-20	0.107698	0.165	0.08	1.39e-15		DUXAP8	8.53e-33	0.205839	0.155	0.04	1.94e-28
LMNA	3.04e-14	0.148365	0.546	0.399	6.91e-10		MSRB1	4.15e-38	0.236915	0.216	0.056	9.44e-34		APCDD1	5.23287e-14	0.153027	0.102	0.036	1.19011e-09		LGALS2	9.51167e-24	0.249744	0.108	0.016	2.16324e-19		NDUFA4	1.08e-09	0.107637	0.714	0.598	2.45e-05		CFL1	8.73e-20	0.205768	0.931	0.818	1.98e-15
LIMA1	1.99e-13	0.148344	0.235	0.137	4.54e-09		IL10RB	7.56e-39	0.236276	0.292	0.1	1.72e-34		TMED10	1.79211e-16	0.153023	0.465	0.309	4.0758e-12		BID	2.09743e-31	0.249562	0.317	0.121	4.77019e-27		TSPAN4	5.44e-25	0.107543	0.198	0.093	1.24e-20		ZBED1	2.78e-25	0.205653	0.206	0.081	6.32e-21
EIF4G1	5.67e-18	0.148236	0.352	0.217	1.29e-13		DPYD	7.36e-42	0.23614	0.336	0.121	1.67e-37		FAM49B	1.25882e-18	0.15294	0.479	0.304	2.86293e-14		FAT1	2.26715e-29	0.249423	0.179	0.044	5.15618e-25		RAD23B	1.12e-19	0.107541	0.313	0.192	2.56e-15		RER1	8.98e-20	0.205203	0.478	0.301	2.04e-15
MFSD14B	9.96e-23	0.148197	0.174	0.065	2.27e-18		PSMD1	1.73e-33	0.236118	0.342	0.147	3.94e-29		DOCK5	3.86413e-23	0.152856	0.138	0.04	8.78818e-19		SIRPB1	6.80804e-36	0.249325	0.144	0.016	1.54835e-31		ARPC1A	6.34e-15	0.107532	0.246	0.156	1.44e-10		SH3TC1	1.14e-24	0.205196	0.283	0.13	2.58e-20
GSAP	9.43e-19	0.148179	0.155	0.062	2.14e-14		OLFML3	3.05e-25	0.235528	0.14	0.035	6.93e-21		RPN1	7.32201e-20	0.152809	0.413	0.251	1.66524e-15		RAB34	2.2317e-46	0.249043	0.301	0.08	5.07556e-42		RSU1	8e-19	0.107503	0.28	0.169	1.82e-14		AXL	9.83e-40	0.204553	0.22	0.065	2.23e-35
SERPINE2	3.42e-17	0.14809	0.108	0.034	7.78e-13		PDIA6	2.48e-25	0.234742	0.486	0.286	5.65e-21		ATP6V1D	1.45608e-26	0.152493	0.25	0.105	3.31157e-22		AXL	5.89681e-46	0.248915	0.22	0.037	1.34111e-41		STARD3NL	8.72e-20	0.107448	0.237	0.134	1.98e-15		C9orf72	5.16e-17	0.204317	0.273	0.147	1.17e-12
RAPGEF1	3.14e-18	0.147719	0.338	0.197	7.14e-14		MAPK6	1.44e-38	0.234575	0.294	0.103	3.28e-34		N4BP2L1	8.92985e-13	0.152394	0.195	0.106	2.03092e-08		COPS7A	1.12207e-41	0.248805	0.265	0.068	2.55193e-37		MRPL28	1.92e-20	0.107384	0.226	0.125	4.36e-16		RBMS2	5.7e-36	0.204272	0.203	0.062	1.3e-31
CDC42	1.28e-14	0.147701	0.686	0.499	2.92e-10		SERPINF1	6.13e-14	0.23447	0.147	0.065	1.4e-09		SSR3	1.62137e-11	0.152023	0.471	0.339	3.68749e-07		FAM20C	2.29082e-32	0.248676	0.185	0.041	5.21002e-28		CHKA	6.46e-14	0.107379	0.104	0.048	1.47e-09		HAPLN3	2.57e-23	0.204107	0.289	0.14	5.86e-19
CDK4	7.91e-21	0.147181	0.248	0.124	1.8e-16		RHOD	1.14e-17	0.23435	0.132	0.044	2.59e-13		STAT5A	2.20162e-18	0.151996	0.226	0.11	5.00715e-14		DOK2	2.85651e-24	0.248146	0.232	0.083	6.49655e-20		IFI35	4.08e-13	0.107352	0.516	0.389	9.29e-09		SIPA1L1	1.83e-28	0.20406	0.396	0.201	4.16e-24
CHKA	7.63e-19	0.146986	0.101	0.026	1.73e-14		NCEH1	1.77e-36	0.234231	0.157	0.026	4.03e-32		MAP7D1	4.69985e-25	0.151974	0.306	0.152	1.06889e-20		SHKBP1	7.21641e-39	0.247773	0.309	0.096	1.64123e-34		COX5B	3.4e-13	0.107185	0.723	0.58	7.73e-09		FCGR1B	3.63e-26	0.203935	0.117	0.028	8.25e-22
WDFY3	1.23e-21	0.146981	0.119	0.032	2.8e-17		RCBTB2	1.67e-32	0.2341	0.185	0.047	3.8e-28		CHKA	2.07926e-19	0.151969	0.104	0.026	4.72886e-15		EPHB2	1.28141e-45	0.247689	0.166	0.013	2.91431e-41		MIIP	2.22e-17	0.107179	0.227	0.132	5.05e-13		LATS2	9.2e-30	0.203925	0.198	0.069	2.09e-25
NT5C2	1.13e-20	0.146839	0.178	0.072	2.57e-16		PLOD1	8.82e-38	0.234079	0.235	0.067	2.01e-33		MSRB1	7.17673e-24	0.151844	0.165	0.056	1.6322e-19		AL645608.7	1.46615e-24	0.247648	0.112	0.017	3.33447e-20		RBMS2	2.78e-22	0.107158	0.145	0.062	6.31e-18		ROMO1	2.2e-22	0.20389	0.699	0.499	5.01e-18
MSRB1	2.74e-22	0.146693	0.158	0.056	6.24e-18		ARHGAP10	5.31e-41	0.233588	0.189	0.035	1.21e-36		CDK4	2.6513e-22	0.151645	0.256	0.124	6.02985e-18		PLOD1	5.46611e-39	0.247541	0.256	0.067	1.24316e-34		RAB1B	4.34e-17	0.107154	0.311	0.199	9.87e-13		SERPINB1	6.21e-24	0.203689	0.547	0.332	1.41e-19
NAPRT	2.02e-21	0.14633	0.128	0.038	4.61e-17		ACTA2	2.9e-14	0.233363	0.105	0.036	6.6e-10		OAS1	5.84829e-19	0.151548	0.373	0.219	1.33008e-14		FCGR1B	2.24465e-29	0.247454	0.117	0.012	5.10502e-25		MFSD12	1.68e-24	0.107002	0.275	0.153	3.82e-20		PFN2	1.02e-26	0.203417	0.18	0.064	2.33e-22
CD302	1.23e-21	0.146294	0.131	0.04	2.79e-17		LTB4R	4.17e-33	0.233322	0.145	0.024	9.49e-29		MYL12A	6.29016e-09	0.151502	0.856	0.729	0.000143057		NAPRT	4.12342e-41	0.247229	0.208	0.038	9.37789e-37		SRGN	0.00520358	0.106941	0.794	0.768	1		SREBF1	4.41e-28	0.202334	0.211	0.078	1e-23
MAPK6	3.23e-23	0.146206	0.23	0.103	7.34e-19		ARF1	2.79e-26	0.233281	0.635	0.402	6.35e-22		SH3GLB1	6.37541e-24	0.151354	0.45	0.26	1.44996e-19		STARD3NL	1.04838e-31	0.246938	0.282	0.096	2.38434e-27		SAV1	3.26e-17	0.10688	0.222	0.127	7.41e-13		CD72	6.69e-19	0.202171	0.19	0.084	1.52e-14
TWIST1	1.85e-14	0.145983	0.111	0.042	4.21e-10		ARNTL2	4.87e-33	0.233274	0.193	0.052	1.11e-28		BCAP29	1.12502e-22	0.151142	0.269	0.13	2.55863e-18		STX12	7.51887e-41	0.246596	0.339	0.111	1.71002e-36		CAVIN3	3.04e-14	0.106821	0.198	0.118	6.9e-10		MTCH2	5.71e-29	0.202015	0.359	0.178	1.3e-24
UBE2E1	2.5e-26	0.145961	0.272	0.126	5.7e-22		RCN1	1.75e-29	0.232552	0.273	0.109	3.99e-25		PSMD8	1.04564e-19	0.150885	0.391	0.23	2.3781e-15		INSIG1	7.72933e-21	0.246276	0.338	0.162	1.75788e-16		PATL1	2.61e-17	0.106707	0.228	0.134	5.94e-13		TIMM13	1.25e-24	0.201804	0.342	0.179	2.85e-20
ATP5PB	1.13e-19	0.145722	0.456	0.281	2.57e-15		SERF2	1.07e-29	0.232091	0.945	0.835	2.44e-25		CAPNS1	7.27701e-23	0.150812	0.473	0.285	1.65501e-18		COLEC12	8.96566e-21	0.245987	0.129	0.032	2.03906e-16		TMEM208	1.99e-15	0.106672	0.345	0.237	4.52e-11		IVNS1ABP	1.03e-17	0.201662	0.531	0.337	2.35e-13
MYD88	1.15e-16	0.145691	0.221	0.114	2.61e-12		EPHB2	3.41e-42	0.232052	0.149	0.013	7.76e-38		IER3IP1	7.70933e-21	0.150601	0.349	0.196	1.75333e-16		TNFRSF12A	6.91301e-22	0.245853	0.263	0.112	1.57223e-17		ERO1A	9.11e-15	0.106656	0.289	0.19	2.07e-10		SUMO3	1.04e-28	0.201635	0.482	0.264	2.36e-24
PDIA6	1.12e-16	0.145626	0.433	0.286	2.55e-12		CYB5R4	4.1e-29	0.231914	0.241	0.088	9.32e-25		COX7B	3.16531e-17	0.150575	0.654	0.466	7.19887e-13		ZBED1	2.6744e-29	0.245508	0.206	0.058	6.08239e-25		ARPC3	1.45e-12	0.106604	0.769	0.65	3.29e-08		RILP	3.89e-26	0.201502	0.195	0.073	8.85e-22
PSMB7	7.19e-22	0.144908	0.348	0.192	1.63e-17		STX6	1.62e-35	0.231744	0.225	0.065	3.68e-31		PSMB7	2.79325e-22	0.150547	0.352	0.192	6.35269e-18		PTGS1	1.38235e-41	0.24514	0.185	0.027	3.14388e-37		IFITM2	3.03e-06	0.106593	0.812	0.693	0.0688271		IRF2BP2	5.22e-26	0.201184	0.516	0.293	1.19e-21
SH3GLB1	2.93e-23	0.144864	0.444	0.26	6.67e-19		AGTRAP	5.82e-40	0.231413	0.308	0.109	1.32e-35		VPS9D1	6.65113e-23	0.150234	0.134	0.038	1.51267e-18		LY86	1.94031e-25	0.24511	0.169	0.044	4.41285e-21		STX4	1.13e-16	0.106564	0.283	0.177	2.57e-12		KLF7	1.28e-29	0.201175	0.22	0.081	2.91e-25
PLBD1	5.26e-20	0.144834	0.104	0.026	1.2e-15		SH3GLB1	1.44e-34	0.231076	0.51	0.26	3.27e-30		RRAGD	1.28609e-19	0.150009	0.107	0.028	2.92495e-15		MTCH2	1.45481e-35	0.244922	0.359	0.137	3.30866e-31		OSMR	1.24e-17	0.106525	0.135	0.063	2.82e-13		RHOC	2.15e-25	0.201023	0.448	0.252	4.89e-21
SH3GL1	9.12e-21	0.144587	0.181	0.075	2.07e-16		CDC20	8.05e-20	0.231068	0.103	0.024	1.83e-15		IGFBP5	3.43791e-08	0.149906	0.102	0.053	0.000781883		RHOC	8.33709e-33	0.244834	0.448	0.203	1.8961e-28		EIF5A	5.99e-09	0.106271	0.504	0.411	0.000136291		CKS1B	8.8e-20	0.200372	0.22	0.104	2e-15
ITGA3	9.68e-16	0.144496	0.123	0.047	2.2e-11		CHKA	5.8e-29	0.229859	0.137	0.026	1.32e-24		DENND3	5.96514e-20	0.149891	0.213	0.098	1.35665e-15		TMEM33	7.71339e-31	0.244372	0.311	0.119	1.75426e-26		MRPS35	1.26e-16	0.105999	0.231	0.138	2.86e-12		SLC37A2	1.05e-37	0.200076	0.182	0.046	2.38e-33
ENAH	3.63e-22	0.144452	0.133	0.04	8.25e-18		C1orf122	9.74e-34	0.229749	0.39	0.182	2.22e-29		JUP	2.19456e-18	0.149881	0.172	0.074	4.99108e-14		AGTRAP	8.0056e-38	0.244184	0.322	0.109	1.82071e-33		ALDOA	3.79e-14	0.105974	0.517	0.394	8.63e-10		PTGS1	3.07e-40	0.200018	0.185	0.046	6.98e-36
CBR1	2.86e-32	0.144451	0.255	0.099	6.5e-28		IDH1	3.07e-45	0.229519	0.24	0.057	6.98e-41		SPPL2A	3.38319e-27	0.149743	0.396	0.212	7.6944e-23		MAFG	5.40357e-35	0.244063	0.254	0.074	1.22893e-30		CDK4	2.29e-18	0.105952	0.256	0.153	5.2e-14		PNPLA6	7.47e-29	0.199881	0.282	0.122	1.7e-24
NSFL1C	1.48e-26	0.144259	0.212	0.083	3.36e-22		TXNDC17	3.77e-26	0.229415	0.526	0.315	8.58e-22		CCDC80	1.98692e-17	0.149608	0.117	0.039	4.51886e-13		FKBP4	9.92304e-47	0.243916	0.291	0.073	2.2568e-42		SMIM26	6.21e-12	0.105747	0.468	0.349	1.41e-07		GSAP	3.43e-29	0.199004	0.232	0.089	7.8e-25
MRPL52	1.28e-19	0.144025	0.461	0.293	2.91e-15		BAX	8.69e-35	0.229263	0.593	0.328	1.98e-30		GOLM1	2.10803e-20	0.149556	0.153	0.056	4.79429e-16		BACH1	1.01734e-26	0.24372	0.404	0.189	2.31374e-22		EHD2	8.92e-22	0.105671	0.144	0.061	2.03e-17		MRPL51	1.19e-24	0.198659	0.488	0.294	2.72e-20
PPA1	8.85e-17	0.143901	0.461	0.308	2.01e-12		SBF2	2.31e-39	0.229233	0.234	0.064	5.25e-35		CTNND1	1.63253e-33	0.149446	0.236	0.083	3.71286e-29		SNX2	4.25787e-38	0.24339	0.415	0.162	9.68367e-34		ATN1	4.35e-20	0.105629	0.216	0.117	9.9e-16		SHTN1	9.2e-36	0.198591	0.166	0.041	2.09e-31
CAPNS1	1.61e-22	0.143828	0.468	0.285	3.66e-18		MT1M	1.17e-17	0.22893	0.103	0.027	2.66e-13		ACSL3	2.89112e-28	0.149242	0.268	0.115	6.57526e-24		BST2	1.80657e-19	0.242714	0.702	0.455	4.10869e-15		PPARD	1.34e-21	0.105179	0.147	0.064	3.05e-17		PLXNB2	1.11e-35	0.198573	0.294	0.118	2.53e-31
SLC35B2	2.6e-27	0.143719	0.218	0.085	5.92e-23		CD72	9.09e-26	0.22875	0.183	0.059	2.07e-21		GDI2	2.32343e-18	0.149168	0.464	0.295	5.28417e-14		FOSB	3.50692e-26	0.242203	0.77	0.495	7.97578e-22		PARVA	1.34e-17	0.105072	0.144	0.07	3.05e-13		PPARD	6.27e-41	0.198535	0.221	0.064	1.43e-36
PDGFB	1.46e-19	0.143549	0.101	0.025	3.33e-15		IRF1	5.79e-17	0.228531	0.705	0.508	1.32e-12		TM9SF2	1.43358e-21	0.148959	0.415	0.244	3.26039e-17		COL12A1	2.95448e-23	0.241631	0.177	0.054	6.71937e-19		REEP3	3.18e-22	0.105033	0.331	0.201	7.24e-18		VIM	1.06e-13	0.198442	0.899	0.738	2.41e-09
ARPC3	1.13e-16	0.143115	0.765	0.598	2.58e-12		C19orf38	3.56e-26	0.22847	0.107	0.015	8.1e-22		SULF2	7.18523e-25	0.14895	0.178	0.062	1.63414e-20		IL10RB	2.72692e-35	0.241223	0.301	0.1	6.20184e-31		DPYSL2	2.66e-15	0.104998	0.206	0.122	6.05e-11		ATP13A2	8.96e-34	0.198071	0.227	0.078	2.04e-29
SAV1	2.36e-21	0.143049	0.215	0.096	5.37e-17		CARM1	4.13e-43	0.228242	0.225	0.052	9.38e-39		CBR1	4.96903e-34	0.148876	0.263	0.099	1.13011e-29		ADIPOR1	1.24066e-37	0.241178	0.401	0.158	2.82164e-33		PSMA2	1.95e-09	0.104941	0.567	0.455	4.45e-05		SAV1	5.86e-32	0.197702	0.301	0.127	1.33e-27
BRK1	1.6e-19	0.142947	0.546	0.353	3.65e-15		ATP1B1	8.16e-33	0.22769	0.233	0.076	1.86e-28		PDE4A	3.59159e-17	0.148847	0.181	0.083	8.16836e-13		SMS	5.01567e-33	0.241138	0.397	0.167	1.14071e-28		SORBS3	5.56e-21	0.104921	0.176	0.085	1.26e-16		TNFSF12	2.2e-19	0.197473	0.31	0.169	5e-15
AREG	3.54e-08	0.142786	0.421	0.318	0.000804534		RCN3	8.9e-24	0.227459	0.167	0.054	2.02e-19		SAV1	1.88622e-22	0.148686	0.222	0.096	4.28983e-18		NMI	3.09058e-38	0.240912	0.397	0.151	7.02891e-34		CDC25B	1.08e-16	0.104881	0.182	0.101	2.46e-12		EVA1B	4.07e-33	0.197281	0.29	0.118	9.25e-29
TM9SF2	1.77e-21	0.142687	0.411	0.244	4.03e-17		CD33	1.71e-26	0.2273	0.103	0.012	3.89e-22		ARPC3	4.42239e-17	0.148646	0.769	0.598	1.00578e-12		CRISPLD2	2.80993e-25	0.2408	0.173	0.047	6.39061e-21		SERF2	1.42e-11	0.104798	0.922	0.868	3.23e-07		RAB34	5.19e-39	0.197091	0.301	0.117	1.18e-34
FAT1	2.05e-19	0.142661	0.129	0.044	4.65e-15		ALDOA	2.34e-26	0.227264	0.565	0.346	5.32e-22		RAB8A	6.37086e-27	0.148536	0.299	0.139	1.44892e-22		TCF7L2	1.8837e-34	0.240559	0.185	0.037	4.28411e-30		DNASE2	1.49e-19	0.104786	0.182	0.093	3.39e-15		EPHB2	2.54e-46	0.196847	0.166	0.029	5.77e-42
FBXO6	3.65e-18	0.142598	0.163	0.069	8.3e-14		ARHGDIA	1.39e-28	0.226991	0.617	0.355	3.16e-24		PTK7	3.84055e-20	0.148525	0.155	0.058	8.73455e-16		JPT1	1.13041e-22	0.240449	0.593	0.352	2.57089e-18		SYPL1	3.82e-16	0.104521	0.327	0.216	8.69e-12		PAFAH1B2	6.7e-33	0.196838	0.296	0.124	1.52e-28
IFI6	6.5e-13	0.142442	0.781	0.643	1.48e-08		NFIC	9.37e-36	0.226594	0.292	0.105	2.13e-31		NT5E	4.4871e-18	0.148277	0.163	0.068	1.0205e-13		CHKA	2.22677e-26	0.240442	0.137	0.026	5.06434e-22		CBR1	2.64e-26	0.104139	0.263	0.14	5.99e-22		CDC42	1.73e-17	0.196772	0.776	0.558	3.94e-13
RTCB	1.02e-22	0.142379	0.288	0.146	2.32e-18		TPMT	2.21e-39	0.226523	0.246	0.071	5.01e-35		PHACTR4	1.37539e-21	0.148264	0.223	0.1	3.12805e-17		ATP13A2	4.34795e-36	0.240024	0.227	0.056	9.88854e-32		MAPK13	1.45e-13	0.104126	0.119	0.06	3.3e-09		CHMP2A	8.34e-26	0.196735	0.447	0.249	1.9e-21
PTGS1	2.71e-21	0.142225	0.109	0.027	6.17e-17		RGS10	1.72e-32	0.226295	0.522	0.27	3.9e-28		IL15	1.73582e-23	0.14825	0.158	0.052	3.94778e-19		CD302	7.13877e-29	0.239775	0.171	0.04	1.62357e-24		NDRG1	1.13e-16	0.103936	0.334	0.218	2.56e-12		HSPA2	4.95e-34	0.196532	0.129	0.025	1.13e-29
TXNDC17	5.57e-17	0.142211	0.47	0.315	1.27e-12		IL15	6.46e-37	0.226151	0.206	0.052	1.47e-32		GSAP	2.57785e-19	0.148122	0.159	0.062	5.86281e-15		FCHO2	5.74789e-29	0.239772	0.145	0.026	1.30724e-24		ERGIC1	1.15e-18	0.103777	0.25	0.145	2.6e-14		TCF7L2	7.78e-31	0.196468	0.185	0.059	1.77e-26
PFKL	3.89e-22	0.142155	0.301	0.156	8.86e-18		GPX3	4.25e-25	0.226064	0.118	0.022	9.67e-21		ATP6AP2	1.6911e-26	0.147932	0.406	0.22	3.84608e-22		PCOLCE	2.34392e-12	0.2396	0.132	0.053	5.33078e-08		CHMP5	1.66e-15	0.103775	0.477	0.343	3.78e-11		GJB3	1.75e-37	0.196355	0.113	0.015	3.99e-33
LIPA	8.71e-26	0.141975	0.242	0.105	1.98e-21		NCSTN	1.29e-37	0.226004	0.279	0.094	2.93e-33		HSD17B4	6.73191e-22	0.147854	0.171	0.064	1.53104e-17		SPAG9	1.00482e-32	0.239526	0.412	0.176	2.28526e-28		TXNDC17	4.74e-13	0.103684	0.475	0.361	1.08e-08		NT5C2	3.81e-31	0.196109	0.256	0.101	8.67e-27
ACSL3	4.25e-27	0.141913	0.261	0.115	9.66e-23		ARHGEF2	3.57e-29	0.22546	0.252	0.097	8.11e-25		SPAG9	9.98578e-23	0.147514	0.334	0.176	2.27107e-18		ADPRH	1.71026e-26	0.239512	0.139	0.027	3.88963e-22		STAT5A	7.1e-13	0.103627	0.226	0.143	1.61e-08		TPX2	1.2e-16	0.196037	0.153	0.065	2.73e-12
MPDU1	9.42e-25	0.141665	0.19	0.071	2.14e-20		MAPK13	3.82e-30	0.225438	0.16	0.037	8.69e-26		SERPINB9	2.37076e-12	0.147347	0.435	0.3	5.39181e-08		SAV1	6.50917e-37	0.239508	0.301	0.096	1.48038e-32		ACTR1A	5.82e-20	0.103576	0.262	0.15	1.32e-15		CHKA	2.29e-20	0.195852	0.137	0.048	5.21e-16
PHACTR4	1.59e-20	0.14166	0.217	0.1	3.63e-16		CBR1	2.67e-49	0.224842	0.321	0.099	6.07e-45		LTBP1	2.11421e-18	0.14721	0.131	0.046	4.80836e-14		RPN1	1.9848e-27	0.239416	0.488	0.251	4.51404e-23		ARPC1B	7.59e-11	0.103575	0.668	0.539	1.73e-06		ASCL2	5.23e-37	0.195599	0.167	0.04	1.19e-32
BEX3	3.14e-18	0.141562	0.245	0.129	7.15e-14		NFKB2	7.22e-36	0.224689	0.445	0.211	1.64e-31		SERPINB1	1.85366e-18	0.146994	0.444	0.278	4.21578e-14		SERPINF1	1.82946e-14	0.23933	0.16	0.065	4.16073e-10		UBE2M	1.19e-16	0.103557	0.334	0.221	2.7e-12		NMI	7.22e-31	0.195461	0.397	0.193	1.64e-26
DOCK5	2.83e-21	0.141394	0.131	0.04	6.45e-17		SERPINB8	5.83e-37	0.224577	0.173	0.033	1.33e-32		DOK2	3.74972e-15	0.146971	0.174	0.083	8.52799e-11		EHD1	3.60283e-24	0.23927	0.277	0.111	8.19391e-20		SEPTIN11	1.43e-14	0.103511	0.203	0.122	3.24e-10		CAPN1	1.69e-26	0.195333	0.316	0.154	3.84e-22
ANKRD9	1.39e-28	0.141364	0.217	0.08	3.16e-24		RNH1	1.24e-37	0.224458	0.404	0.176	2.82e-33		TXNDC17	1.72278e-17	0.146952	0.475	0.315	3.91812e-13		CALM3	1.88389e-28	0.239201	0.564	0.295	4.28454e-24		NAGA	2.16e-21	0.103481	0.155	0.07	4.92e-17		ST13	8.54e-20	0.194947	0.483	0.3	1.94e-15
COX7B	2e-16	0.141257	0.647	0.466	4.54e-12		MGST3	8.16e-32	0.224134	0.466	0.235	1.86e-27		RAP1A	1.65162e-18	0.146915	0.505	0.323	3.75629e-14		GPX3	6.88166e-27	0.238861	0.131	0.022	1.56509e-22		DAD1	6.15e-10	0.103405	0.535	0.435	1.4e-05		NFAM1	2.66e-27	0.19481	0.101	0.019	6.04e-23
EIF4A1	1.72e-14	0.141127	0.757	0.607	3.91e-10		ZFYVE16	6.82e-38	0.224107	0.284	0.098	1.55e-33		NAPRT	2.62201e-23	0.146714	0.136	0.038	5.96323e-19		ABHD5	9.6259e-21	0.238551	0.297	0.135	2.18922e-16		COX8A	4e-13	0.103265	0.727	0.61	9.09e-09		AL627171.2	1.45e-13	0.194652	0.265	0.151	3.3e-09
IRF2BP2	1.59e-19	0.141114	0.404	0.241	3.62e-15		KLF7	9.86e-34	0.224069	0.203	0.056	2.24e-29		AZIN1	1.72487e-22	0.146437	0.34	0.182	3.92287e-18		SERPINB8	6.7834e-39	0.238176	0.191	0.033	1.54275e-34		AKR1A1	1.73e-21	0.103235	0.41	0.266	3.92e-17		ADAM10	7.28e-30	0.194519	0.373	0.181	1.66e-25
TAX1BP3	6e-22	0.140942	0.258	0.127	1.36e-17		COLEC12	3.27e-20	0.223752	0.119	0.032	7.44e-16		ENAH	2.69985e-24	0.146104	0.141	0.04	6.14028e-20		KLF7	2.27478e-34	0.238105	0.22	0.056	5.17354e-30		TPRA1	5.2e-17	0.103208	0.211	0.121	1.18e-12		STX12	9.08e-32	0.194465	0.339	0.154	2.07e-27
LIMK2	1.77e-24	0.140905	0.191	0.072	4.03e-20		UBE2Z	6.46e-39	0.223747	0.356	0.142	1.47e-34		PTGS1	7.60856e-23	0.14603	0.115	0.027	1.73041e-18		SLC36A1	2.61664e-31	0.238005	0.166	0.033	5.95103e-27		STAT2	4.16e-19	0.103169	0.478	0.327	9.47e-15		AC253572.2	6e-21	0.194341	0.1	0.026	1.36e-16
TESK1	2.7e-20	0.140723	0.161	0.062	6.14e-16		SHKBP1	3.48e-38	0.22364	0.286	0.096	7.91e-34		PLOD2	3.98549e-19	0.145969	0.15	0.057	9.0642e-15		NT5E	4.52227e-25	0.237316	0.208	0.068	1.0285e-20		RALB	1.91e-22	0.103033	0.206	0.104	4.34e-18		LRPAP1	7.46e-23	0.19428	0.369	0.199	1.7e-18
CAV2	3.34e-16	0.14065	0.181	0.087	7.6e-12		IL1RAP	1.41e-32	0.22356	0.192	0.051	3.21e-28		ALDOA	1.39677e-18	0.145868	0.517	0.346	3.17666e-14		FUCA1	2.07664e-21	0.237313	0.131	0.032	4.72291e-17		NRIP1	7.57e-19	0.103022	0.226	0.128	1.72e-14		SERPINB8	4.01e-34	0.19409	0.191	0.057	9.12e-30
ZNFX1	2.24e-23	0.140256	0.334	0.178	5.09e-19		THY1	5.26e-10	0.223327	0.113	0.053	1.2e-05		MPDU1	2.4571e-26	0.145753	0.198	0.071	5.58819e-22		TRIP6	6.05183e-40	0.237227	0.255	0.066	1.37637e-35		MYO1F	4.09e-10	0.103009	0.191	0.126	9.31e-06		HPS5	7.59e-30	0.193955	0.233	0.088	1.73e-25
S100A13	2.25e-18	0.140241	0.259	0.139	5.12e-14		TNFRSF10B	4.01e-30	0.222915	0.232	0.08	9.12e-26		SLC15A4	6.52969e-26	0.145637	0.227	0.092	1.48505e-21		TES	7.34255e-28	0.237166	0.383	0.172	1.66992e-23		SAMD4A	6.32e-18	0.102915	0.163	0.082	1.44e-13		NAPRT	1.59e-40	0.193813	0.208	0.057	3.62e-36
PSMD8	9.26e-19	0.140222	0.383	0.23	2.11e-14		FSTL1	2.76e-21	0.222813	0.212	0.088	6.27e-17		LIPA	1.90514e-27	0.145612	0.25	0.105	4.33285e-23		ST13	1.19568e-24	0.237057	0.483	0.254	2.71935e-20		SDSL	2.22e-21	0.102869	0.115	0.043	5.04e-17		SPTLC2	1.85e-26	0.193726	0.31	0.146	4.21e-22
CCT6A	8.3e-17	0.140017	0.371	0.234	1.89e-12		TCF7L2	1.48e-32	0.222761	0.167	0.037	3.36e-28		GNPTG	2.59021e-26	0.145536	0.287	0.133	5.89091e-22		SSR3	4.17072e-15	0.236904	0.527	0.339	9.48547e-11		GAS2L1	2.02e-22	0.102851	0.114	0.041	4.6e-18		DYNLT1	1.45e-14	0.193646	0.698	0.508	3.3e-10
MLF2	9.26e-21	0.13998	0.407	0.247	2.11e-16		NME2	2.57e-20	0.222679	0.687	0.511	5.83e-16		PNPLA6	3.67147e-22	0.14549	0.205	0.086	8.35003e-18		PALLD	9.12781e-26	0.23675	0.229	0.08	2.07594e-21		GJA1	8.73e-16	0.102829	0.109	0.048	1.99e-11		RBM42	1e-31	0.193315	0.311	0.137	2.28e-27
ALDOA	7.23e-18	0.139869	0.511	0.346	1.64e-13		IGFBP4	7.79e-27	0.222547	0.277	0.117	1.77e-22		CDC42	1.34455e-14	0.145486	0.69	0.499	3.0579e-10		UBE2C	1.22434e-19	0.236673	0.142	0.041	2.78452e-15		ADIPOR1	1.63e-22	0.102653	0.31	0.184	3.71e-18		LY86	3.79e-20	0.193185	0.169	0.067	8.63e-16
INSIG1	6.52e-15	0.139621	0.28	0.162	1.48e-10		ACTR3	4.53e-29	0.222247	0.638	0.38	1.03e-24		STAT6	8.89836e-22	0.145459	0.28	0.139	2.02376e-17		IL1RAP	2.10047e-33	0.23664	0.208	0.051	4.77711e-29		CARD19	2.62e-15	0.10251	0.217	0.129	5.96e-11		PLOD2	9.4e-27	0.193162	0.191	0.07	2.14e-22
IL10RB	4.38e-23	0.139405	0.226	0.1	9.96e-19		FST	6.55e-25	0.221638	0.106	0.017	1.49e-20		GPM6B	7.91522e-12	0.1454	0.104	0.044	1.80016e-07		MLF2	3.11027e-28	0.236528	0.48	0.247	7.07369e-24		AL627171.2	1.02e-08	0.102485	0.217	0.151	0.000232451		FUCA1	3.21e-19	0.192856	0.131	0.046	7.31e-15
TCIM	3.42e-08	0.139404	0.113	0.061	0.000777539		EIF4A1	1.34e-22	0.22162	0.801	0.607	3.04e-18		RGS10	1.90198e-18	0.145284	0.441	0.27	4.32568e-14		COL7A1	1.88237e-29	0.235915	0.198	0.053	4.28107e-25		THOC7	4.62e-18	0.102309	0.305	0.192	1.05e-13		EI24	1.92e-18	0.192562	0.262	0.139	4.36e-14
VDAC1	4.34e-19	0.139287	0.474	0.307	9.86e-15		CD302	9.6e-32	0.221535	0.169	0.04	2.18e-27		FBP1	2.68077e-15	0.144988	0.102	0.034	6.09689e-11		SPCS3	1.40259e-28	0.235834	0.553	0.289	3.18991e-24		RABGEF1	2.52e-14	0.10217	0.178	0.102	5.73e-10		RBPJ	1.86e-28	0.192276	0.521	0.293	4.22e-24
IL15	4.45e-22	0.139272	0.152	0.052	1.01e-17		RHOC	2.41e-34	0.221371	0.425	0.203	5.48e-30		NDUFA4	3.13836e-12	0.144391	0.714	0.555	7.13756e-08		NTAN1	6.5692e-42	0.235558	0.289	0.081	1.49403e-37		COA6	1.27e-22	0.102078	0.222	0.115	2.89e-18		PSMB3	6.82e-19	0.192222	0.689	0.492	1.55e-14
TMEM35B	2.03e-17	0.139109	0.319	0.185	4.63e-13		TRIM29	3.58e-24	0.221317	0.113	0.022	8.15e-20		TMCO1	3.07707e-22	0.144018	0.353	0.19	6.99819e-18		AGPAT2	6.06535e-41	0.23545	0.3	0.089	1.37944e-36		MAPKAPK3	3.4e-15	0.102056	0.166	0.091	7.73e-11		SLC39A1	3.27e-29	0.192162	0.285	0.123	7.44e-25
NR2F2	1.47e-14	0.139078	0.115	0.044	3.35e-10		RAPGEF2	1.5e-28	0.221251	0.247	0.095	3.42e-24		TMEM33	1.98384e-21	0.144005	0.247	0.119	4.51184e-17		SPINT1	5.96207e-34	0.235019	0.18	0.035	1.35595e-29		PSMD11	1.02e-18	0.101919	0.346	0.224	2.33e-14		CD36	5.2e-23	0.191903	0.135	0.042	1.18e-18
WDR83OS	2.34e-13	0.138963	0.581	0.418	5.31e-09		YIF1B	7.49e-41	0.22102	0.298	0.101	1.7e-36		VDAC1	1.08198e-19	0.143921	0.479	0.307	2.46076e-15		TMED10	7.6146e-21	0.234845	0.521	0.309	1.73179e-16		UBL5	1.01e-09	0.101911	0.738	0.626	2.31e-05		SMIM26	2.83e-19	0.191424	0.548	0.349	6.43e-15
SNAI2	8.29e-19	0.138636	0.133	0.047	1.89e-14		CTNNAL1	2.22e-20	0.220931	0.151	0.053	5.04e-16		LOXL2	1.13428e-10	0.143903	0.101	0.045	2.5797e-06		PLBD1	1.24351e-34	0.234503	0.163	0.026	2.82812e-30		SPNS1	1.49e-16	0.101867	0.187	0.104	3.39e-12		CFLAR	2.07e-09	0.190897	0.716	0.549	4.71e-05
RPN1	2.54e-18	0.138139	0.403	0.251	5.77e-14		NECAP2	4.7e-39	0.219846	0.306	0.108	1.07e-34		SLC35B2	5.60271e-28	0.143614	0.223	0.085	1.27423e-23		SAMD4A	6.55475e-34	0.234404	0.228	0.06	1.49075e-29		SVBP	1.62e-18	0.10186	0.25	0.147	3.7e-14		RDX	3.99e-26	0.190875	0.271	0.122	9.08e-22
SRGAP2	5e-16	0.13798	0.179	0.086	1.14e-11		TMCC3	2.57e-26	0.219774	0.144	0.035	5.85e-22		CKS1B	7.46141e-14	0.143435	0.178	0.092	1.69695e-09		RNH1	5.9818e-36	0.23429	0.427	0.176	1.36044e-31		FGD2	1.49e-09	0.101742	0.167	0.108	3.38e-05		GBA	4.8e-40	0.190718	0.256	0.085	1.09e-35
AZIN1	1.09e-21	0.137946	0.334	0.182	2.48e-17		TUT7	2.94e-32	0.218841	0.262	0.095	6.69e-28		AHCY	1.02038e-17	0.143335	0.171	0.075	2.32064e-13		NME2	1.08935e-17	0.234051	0.699	0.511	2.47751e-13		MANBAL	7.64e-21	0.101661	0.137	0.058	1.74e-16		DOCK5	4.1e-40	0.190348	0.211	0.059	9.32e-36
GDI2	1.23e-17	0.137901	0.457	0.295	2.8e-13		MYD88	1.44e-27	0.218342	0.275	0.114	3.27e-23		RSU1	4.66465e-25	0.143311	0.28	0.131	1.06088e-20		NR4A1	1.58101e-36	0.233798	0.603	0.304	3.5957e-32		LCP1	0.000631098	0.101644	0.486	0.431	1		HDLBP	4.99e-22	0.190318	0.441	0.262	1.13e-17
STX6	1.01e-20	0.137874	0.167	0.065	2.3e-16		WDFY3	4.67e-35	0.21823	0.165	0.032	1.06e-30		SMS	5.8039e-22	0.143307	0.317	0.167	1.31998e-17		FLNB	1.26346e-24	0.233717	0.209	0.07	2.87349e-20		PIK3R5	1.66e-07	0.101607	0.176	0.123	0.00378363		VASP	4.33e-28	0.190214	0.455	0.247	9.85e-24
SEC31A	8.8e-23	0.137874	0.334	0.179	2e-18		LIMA1	2.65e-17	0.21775	0.26	0.137	6.04e-13		RNH1	3.20354e-24	0.143298	0.342	0.176	7.28581e-20		FOSL2	5.82046e-18	0.233399	0.6	0.366	1.32375e-13		PPIA	3.53e-08	0.101576	0.888	0.841	0.000803262		PDE4A	5.68e-19	0.190182	0.242	0.12	1.29e-14
BMP1	1.07e-19	0.137762	0.151	0.057	2.44e-15		EGFR	1.85e-27	0.217673	0.142	0.032	4.21e-23		TUT7	3.78558e-22	0.142484	0.218	0.095	8.60954e-18		PLXNB2	3.87082e-42	0.232929	0.294	0.084	8.8034e-38		VDAC1	6.39e-15	0.101545	0.479	0.357	1.45e-10		EIF4A1	6.55e-17	0.190125	0.824	0.653	1.49e-12
GMPR	4.79e-16	0.137373	0.102	0.033	1.09e-11		PTPA	1.13e-36	0.217669	0.294	0.106	2.57e-32		TNFSF12	1.89424e-17	0.142473	0.239	0.124	4.30808e-13		NCOR2	3.21979e-38	0.232741	0.394	0.15	7.32278e-34		HM13	2.32e-13	0.101528	0.442	0.327	5.28e-09		IL10RB	1.58e-30	0.190068	0.301	0.13	3.6e-26
NDUFA4	1.18e-11	0.137295	0.707	0.555	2.69e-07		PURB	1.57e-32	0.217602	0.257	0.091	3.57e-28		TWIST1	3.11637e-15	0.142463	0.114	0.042	7.08757e-11		NBN	1.37104e-31	0.23238	0.355	0.14	3.11815e-27		NAA20	1.47e-20	0.101525	0.267	0.157	3.35e-16		MAFG	7.64e-27	0.189862	0.254	0.109	1.74e-22
FOSL2	3.17e-12	0.137189	0.52	0.366	7.21e-08		ST8SIA4	1.23e-21	0.217494	0.238	0.106	2.79e-17		LTB4R	1.41934e-19	0.142426	0.101	0.024	3.228e-15		DNAJB6	1.61256e-19	0.232367	0.607	0.366	3.66744e-15		NDUFA6	1.48e-11	0.101478	0.489	0.368	3.36e-07		WIPI2	1.61e-24	0.189683	0.288	0.136	3.67e-20
CDK2AP1	4.74e-25	0.136972	0.313	0.16	1.08e-20		CCT6A	1.69e-23	0.217349	0.413	0.234	3.84e-19		RBP1	1.60867e-15	0.142424	0.17	0.08	3.65859e-11		SBF2	4.68811e-40	0.232315	0.254	0.064	1.06622e-35		MRPS18C	1.47e-17	0.101452	0.374	0.248	3.34e-13		PLEKHA7	2.09e-21	0.189543	0.128	0.041	4.74e-17
ADH5	2.2e-20	0.136854	0.301	0.164	5e-16		MTCH2	5.79e-36	0.21692	0.337	0.137	1.32e-31		TAX1BP3	1.02887e-22	0.142366	0.264	0.127	2.33995e-18		SREBF1	1.1304e-31	0.231926	0.211	0.056	2.57088e-27		MPDU1	2.75e-21	0.101403	0.198	0.101	6.25e-17		LGALS2	1.71e-19	0.189211	0.108	0.032	3.88e-15
ENTPD1	4.67e-16	0.136804	0.272	0.153	1.06e-11		MYO1B	3.67e-23	0.216664	0.2	0.077	8.35e-19		SEM1	2.12698e-18	0.142333	0.641	0.459	4.8374e-14		GBA	5.47802e-46	0.231801	0.256	0.055	1.24587e-41		PRDX4	1.96e-14	0.101215	0.32	0.218	4.45e-10		SH3GLB1	1.89e-22	0.189145	0.521	0.313	4.29e-18
AK4	5.71e-18	0.136645	0.113	0.036	1.3e-13		TM9SF2	5.24e-31	0.216391	0.47	0.244	1.19e-26		WDR83OS	7.8437e-14	0.141945	0.586	0.418	1.78389e-09		DNASE2	2.17916e-36	0.231767	0.237	0.062	4.95607e-32		NCSTN	4.82e-19	0.101073	0.226	0.127	1.1e-14		ITPRID2	6.34e-29	0.188866	0.253	0.105	1.44e-24
NMI	1.53e-24	0.136622	0.304	0.151	3.47e-20		JOSD2	2.45e-43	0.216036	0.358	0.133	5.57e-39		TBC1D14	6.79948e-21	0.141922	0.177	0.07	1.54641e-16		IDH1	5.70152e-40	0.231615	0.241	0.057	1.2967e-35		ITPRID2	1.18e-17	0.101038	0.192	0.105	2.68e-13		ANAPC11	3.43e-20	0.188425	0.593	0.393	7.81e-16
AFF4	5.68e-19	0.136483	0.401	0.239	1.29e-14		UBE2E1	2.63e-40	0.214975	0.335	0.126	5.99e-36		STX6	2.47061e-22	0.141772	0.174	0.065	5.61892e-18		DPH3	3.41055e-44	0.231606	0.352	0.11	7.7566e-40		CRYAB	1.56e-06	0.101036	0.107	0.069	0.0354883		NCEH1	2.45e-32	0.188035	0.167	0.046	5.56e-28
C1orf122	1.11e-21	0.1363	0.33	0.182	2.52e-17		AGRN	5.4e-33	0.214684	0.225	0.071	1.23e-28		SNX2	8.4606e-26	0.141333	0.328	0.162	1.92419e-21		C19orf38	8.76045e-27	0.231569	0.115	0.015	1.99239e-22		PTGS1	1.66e-19	0.100908	0.115	0.046	3.77e-15		PRXL2A	7.57e-33	0.18782	0.18	0.053	1.72e-28
HSP90AA1	2.16e-15	0.136148	0.832	0.716	4.91e-11		SLC66A2	7.28e-35	0.214654	0.298	0.113	1.66e-30		UBE2E1	3.54532e-26	0.141105	0.275	0.126	8.06311e-22		TLR1	9.34205e-29	0.231283	0.134	0.021	2.12466e-24		TJP1	3.73e-16	0.100859	0.161	0.086	8.49e-12		COLEC12	1.71e-14	0.187718	0.129	0.054	3.89e-10
RSU1	6.27e-24	0.135985	0.273	0.131	1.43e-19		HSPA5	3.75e-19	0.21402	0.544	0.359	8.53e-15		UBA6	4.96773e-24	0.140702	0.224	0.094	1.12981e-19		TMCC3	1.43539e-29	0.230946	0.165	0.035	3.26451e-25		PSME3	4.69e-16	0.100739	0.241	0.146	1.07e-11		CSNK1A1	1.91e-20	0.187677	0.555	0.353	4.34e-16
MAP7D1	2.97e-23	0.135829	0.297	0.152	6.75e-19		GIMAP5	5e-17	0.213815	0.266	0.136	1.14e-12		CSNK1A1	2.80233e-18	0.140684	0.479	0.305	6.37335e-14		CD36	8.37204e-30	0.230923	0.135	0.019	1.90405e-25		MAGOH	5.3e-14	0.100697	0.366	0.256	1.2e-09		JAK2	4.85e-23	0.187641	0.269	0.128	1.1e-18
DENND1A	2.4e-15	0.135267	0.149	0.066	5.46e-11		RBMS1	7.33e-40	0.213645	0.499	0.232	1.67e-35		CLEC11A	1.95007e-24	0.140681	0.148	0.044	4.43505e-20		NCEH1	2.984e-36	0.230871	0.167	0.026	6.78651e-32		CTNNB1	6.78e-17	0.100694	0.428	0.296	1.54e-12		UACA	6.74e-25	0.187308	0.172	0.061	1.53e-20
BCAP29	1.8e-21	0.135232	0.262	0.13	4.09e-17		MIIP	2.77e-36	0.2135	0.278	0.096	6.3e-32		NR2F2	5.62582e-16	0.140626	0.121	0.044	1.27948e-11		RRAGD	1.5514e-30	0.23063	0.154	0.028	3.52835e-26		ATP5F1C	1.65e-12	0.100641	0.486	0.358	3.75e-08		SLC44A1	4.58e-27	0.18691	0.277	0.124	1.04e-22
EGFR	8.09e-18	0.135124	0.106	0.032	1.84e-13		RIN3	1.14e-30	0.213347	0.214	0.068	2.59e-26		TWF2	4.26569e-25	0.140569	0.288	0.135	9.70145e-21		RER1	2.42331e-25	0.2306	0.478	0.253	5.51133e-21		LOXL2	3.08e-08	0.100593	0.101	0.06	0.000699443		KCNMB1	1.61e-17	0.186527	0.115	0.04	3.67e-13
ABI3	4.93e-13	0.13443	0.179	0.095	1.12e-08		N4BP2L1	1.62e-18	0.213178	0.228	0.106	3.68e-14		WDFY3	2.2068e-22	0.140546	0.122	0.032	5.01892e-18		UACA	7.41635e-27	0.230308	0.172	0.044	1.6867e-22		PDLIM7	2.34e-21	0.100592	0.263	0.151	5.32e-17		MEGF9	1.05e-18	0.186485	0.151	0.059	2.4e-14
TRAFD1	5.74e-17	0.134389	0.16	0.069	1.3e-12		ATP6V1D	4.04e-34	0.213081	0.285	0.105	9.2e-30		SPINT1	2.42563e-18	0.140324	0.115	0.035	5.51661e-14		RAP1A	8.8186e-25	0.23	0.586	0.323	2.00562e-20		MIR155HG	6.42e-06	0.100583	0.209	0.16	0.146022		ATP5MPL	1.3e-21	0.186119	0.68	0.467	2.95e-17
IER3IP1	2.38e-19	0.134089	0.34	0.196	5.4e-15		DOCK5	5.9e-36	0.213079	0.183	0.04	1.34e-31		TESK1	1.48096e-20	0.140249	0.164	0.062	3.36815e-16		SH3GLB1	2.87107e-29	0.229944	0.521	0.26	6.52967e-25		MEA1	8.28e-19	0.100565	0.318	0.203	1.88e-14		NFKBID	1.85e-24	0.18605	0.37	0.196	4.2e-20
COPS7A	2.83e-25	0.13407	0.186	0.068	6.44e-21		TWF2	2.45e-34	0.212995	0.333	0.135	5.57e-30		DENND1A	8.22557e-16	0.140199	0.152	0.066	1.87074e-11		ITPK1	5.44984e-35	0.229936	0.237	0.064	1.23946e-30		S100A8	1.46e-39	0.10053	0.381	0.205	3.31e-35		PLS3	1.34e-22	0.185918	0.181	0.073	3.05e-18
FEZ2	2.96e-26	0.134065	0.241	0.103	6.74e-22		OAS1	1.67e-28	0.21284	0.428	0.219	3.8e-24		AGRN	3.09381e-24	0.140129	0.189	0.071	7.03625e-20		ITGB7	4.66606e-22	0.229065	0.211	0.076	1.0612e-17		HMGB3	2.95e-18	0.10048	0.131	0.059	6.7e-14		CALM3	2.15e-22	0.185289	0.564	0.348	4.89e-18
CTNNB1	3.77e-23	0.134064	0.421	0.244	8.58e-19		SAMD4A	3.93e-34	0.212769	0.213	0.06	8.93e-30		ATP5F1E	1.85797e-11	0.139968	0.908	0.807	4.22557e-07		VASH1	1.87173e-23	0.228404	0.163	0.045	4.25688e-19		DSTN	6.49e-11	0.100422	0.402	0.311	1.48e-06		CPPED1	1.43e-30	0.185236	0.213	0.077	3.25e-26
IL15RA	5.28e-25	0.133767	0.163	0.053	1.2e-20		FUCA1	5.18e-22	0.212691	0.125	0.032	1.18e-17		ZNFX1	1.49653e-23	0.139727	0.338	0.178	3.40357e-19		SLC39A1	1.24804e-34	0.22825	0.285	0.092	2.83841e-30		LIPA	6.3e-22	0.100253	0.25	0.138	1.43e-17		LGALS9	1.07e-20	0.184676	0.405	0.234	2.43e-16
LY6E	1.51e-14	0.133682	0.834	0.697	3.44e-10		ARHGAP21	1.44e-34	0.212667	0.237	0.075	3.28e-30		ANKRD9	7.74239e-29	0.139596	0.22	0.08	1.76085e-24		LAD1	3.99774e-26	0.227479	0.136	0.026	9.09207e-22		PGRMC1	1.92e-18	0.100126	0.23	0.133	4.38e-14		LMO2	9.03e-23	0.184645	0.203	0.084	2.05e-18
CTNND1	8.71e-31	0.133542	0.226	0.083	1.98e-26		CTNNB1	7.09e-34	0.21259	0.486	0.244	1.61e-29		IL10RB	1.24975e-24	0.139595	0.234	0.1	2.84231e-20		TRPV2	3.72153e-25	0.227375	0.206	0.067	8.46388e-21		FAM49B	1.11e-13	0.100043	0.479	0.351	2.53e-09		DNAJC5	6.12e-38	0.184644	0.263	0.09	1.39e-33
NDUFS2	1.07e-24	0.133504	0.282	0.137	2.44e-20		PAPSS1	3.61e-35	0.212577	0.321	0.127	8.22e-31		CTNNB1	8.95433e-24	0.139507	0.428	0.244	2.03648e-19		VDR	4.99705e-36	0.227371	0.225	0.056	1.13648e-31		SIL1	5.23e-21	0.0999825	0.178	0.087	1.19e-16		AEBP1	1.92e-25	0.184439	0.243	0.102	4.36e-21
NT5E	9.11e-17	0.133462	0.157	0.068	2.07e-12		AHNAK2	3.28e-23	0.211864	0.101	0.017	7.47e-19		TMEM208	6.59366e-21	0.139361	0.345	0.195	1.4996e-16		LATS2	1.31227e-31	0.227137	0.198	0.049	2.98449e-27		SLC44A1	1.29e-19	0.0999685	0.223	0.124	2.94e-15		SIRPB1	5.73e-30	0.184359	0.144	0.037	1.3e-25
TMX1	8.5e-23	0.133361	0.303	0.156	1.93e-18		VDR	4.68e-33	0.211819	0.201	0.056	1.06e-28		MFSD14B	1.32021e-23	0.139351	0.179	0.065	3.00255e-19		RCBTB2	1.07326e-29	0.226852	0.189	0.047	2.44092e-25		DENND1A	1.55e-11	0.0999261	0.152	0.09	3.53e-07		MAPRE1	8.61e-26	0.184172	0.389	0.206	1.96e-21
UBAC1	4.4e-22	0.13317	0.228	0.103	1e-17		VAC14	4.62e-36	0.211724	0.194	0.046	1.05e-31		NMI	2.02307e-25	0.139183	0.31	0.151	4.60107e-21		CLDN1	1.64172e-27	0.226719	0.131	0.022	3.73377e-23		GNPDA1	2.25e-18	0.0992777	0.169	0.085	5.12e-14		NR1H3	1.38e-21	0.183768	0.103	0.027	3.13e-17
ENG	7.96e-25	0.132604	0.215	0.089	1.81e-20		TRIP6	3.84e-40	0.211517	0.239	0.066	8.73e-36		TMEM127	1.20826e-27	0.138917	0.225	0.086	2.74794e-23		VASP	6.26597e-33	0.226499	0.455	0.205	1.42507e-28		TGM2	3.74e-21	0.098967	0.195	0.1	8.51e-17		JOSD2	5.2e-32	0.183758	0.359	0.168	1.18e-27
NCEH1	5.73e-20	0.132593	0.103	0.026	1.3e-15		TNIP1	4.55e-34	0.211427	0.35	0.149	1.03e-29		GMPR	3.71693e-17	0.138902	0.107	0.033	8.45342e-13		PAFAH1B2	2.746e-39	0.226382	0.296	0.09	6.24522e-35		LGALS9	4.03e-12	0.0988853	0.332	0.234	9.18e-08		AGPAT2	4.86e-33	0.1836	0.3	0.126	1.1e-28
CYB5R4	7.72e-16	0.132394	0.183	0.088	1.76e-11		LMO2	2.06e-29	0.211304	0.196	0.059	4.7e-25		ITGB7	2.27825e-14	0.138828	0.161	0.076	5.18142e-10		AC253572.2	8.3099e-19	0.226288	0.1	0.02	1.88992e-14		KIAA0930	2.06e-21	0.098819	0.216	0.115	4.69e-17		IFNAR1	3.9e-21	0.183443	0.342	0.184	8.87e-17
UBE2Z	8.26e-26	0.132301	0.295	0.142	1.88e-21		TMEM127	2.62e-38	0.211182	0.269	0.086	5.95e-34		ABR	1.2818e-21	0.138762	0.197	0.082	2.9152e-17		GALNT6	1.51687e-45	0.2262	0.253	0.052	3.44982e-41		PPP2CB	1.21e-22	0.0988134	0.273	0.156	2.75e-18		MET	1.57e-32	0.183402	0.134	0.029	3.58e-28
PTK7	5.19e-18	0.132035	0.146	0.058	1.18e-13		TACSTD2	1.41e-14	0.21098	0.128	0.05	3.2e-10		CD302	2.39892e-21	0.138299	0.132	0.04	5.45586e-17		RCN1	2.03515e-27	0.226015	0.285	0.109	4.62853e-23		DCUN1D3	3e-13	0.0987851	0.119	0.061	6.82e-09		ATN1	2.83e-30	0.183374	0.278	0.117	6.43e-26
MRPS18C	1.14e-22	0.13203	0.366	0.204	2.6e-18		DYNC1I2	8.13e-30	0.21084	0.298	0.125	1.85e-25		COPS7A	2.06708e-27	0.138247	0.195	0.068	4.70115e-23		MSRB1	6.69006e-38	0.225122	0.232	0.056	1.52152e-33		VCL	2.65e-17	0.0986695	0.196	0.108	6.03e-13		CKAP5	1.14e-27	0.182477	0.253	0.105	2.6e-23
RIN3	6.8e-20	0.131892	0.169	0.068	1.55e-15		LPCAT4	1.85e-16	0.210826	0.19	0.089	4.2e-12		LIMK2	8.0508e-26	0.138219	0.197	0.072	1.83099e-21		CD33	1.25507e-25	0.224987	0.105	0.012	2.8544e-21		SNRPC	4.71e-15	0.0986418	0.388	0.273	1.07e-10		PFN1	1.58e-25	0.182459	0.938	0.843	3.59e-21
CDC42SE1	2.34e-19	0.131816	0.438	0.267	5.31e-15		SPCS3	2.23e-29	0.210541	0.526	0.289	5.08e-25		MRPS18C	1.29117e-23	0.138155	0.374	0.204	2.9365e-19		HLA-DOA	4.32837e-25	0.224542	0.171	0.046	9.84401e-21		RER1	1.61e-14	0.0986172	0.42	0.301	3.67e-10		C4orf48	1.24e-21	0.182231	0.655	0.424	2.83e-17
UACA	1.91e-16	0.131792	0.12	0.044	4.35e-12		GAB2	3.03e-26	0.210446	0.127	0.026	6.89e-22		PDGFB	1.86067e-19	0.138139	0.102	0.025	4.23172e-15		HPS5	3.86135e-32	0.224287	0.233	0.067	8.78186e-28		STX6	5.52e-19	0.0984788	0.174	0.088	1.26e-14		MYO1C	6.05e-28	0.182044	0.262	0.113	1.38e-23
TMED10	6.19e-15	0.13179	0.456	0.309	1.41e-10		NCOR2	5.5e-41	0.210414	0.378	0.15	1.25e-36		SLC22A18	4.03419e-22	0.137842	0.167	0.06	9.17496e-18		PPARD	1.21148e-40	0.224194	0.221	0.045	2.75527e-36		MBOAT7	1.21e-18	0.0984429	0.183	0.096	2.75e-14		CTSV	3.71e-40	0.181852	0.119	0.015	8.45e-36
TMEM165	8.87e-19	0.131634	0.451	0.283	2.02e-14		PPARD	6e-39	0.210413	0.201	0.045	1.37e-34		RTCB	6.56908e-23	0.137803	0.291	0.146	1.49401e-18		S100A13	3.1553e-28	0.224114	0.334	0.139	7.17609e-24		PPP1CA	2.55e-14	0.0983504	0.426	0.306	5.79e-10		COL6A2	2.83e-19	0.181778	0.236	0.113	6.44e-15
CSNK1A1	1.44e-17	0.131487	0.472	0.305	3.28e-13		COL4A2	4.07e-17	0.210225	0.202	0.092	9.25e-13		PRKDC	2.87235e-16	0.137793	0.323	0.193	6.53259e-12		GRK3	2.37246e-29	0.223589	0.19	0.049	5.39569e-25		CHMP4B	9.76e-18	0.0982543	0.322	0.206	2.22e-13		LTBP1	5.48e-28	0.18159	0.168	0.054	1.25e-23
EIF4A3	5.7e-16	0.131375	0.418	0.264	1.3e-11		IFI35	1.82e-27	0.21018	0.573	0.334	4.14e-23		C1orf122	3.89468e-23	0.13768	0.339	0.182	8.85766e-19		IGFBP6	2.23922e-27	0.223308	0.145	0.029	5.09266e-23		DNM2	6.76e-16	0.0981716	0.36	0.241	1.54e-11		SOX15	2.23e-34	0.181546	0.11	0.016	5.06e-30
TMEM208	2.91e-20	0.131338	0.34	0.195	6.62e-16		ARPC3	5.61e-23	0.209813	0.812	0.598	1.28e-18		PPA1	9.69436e-17	0.137619	0.464	0.308	2.20479e-12		AP1S2	6.4795e-19	0.223295	0.263	0.121	1.47363e-14		GLRX3	2.44e-20	0.0981505	0.269	0.159	5.55e-16		CYB5R1	2.91e-25	0.181439	0.218	0.089	6.63e-21
OASL	1.73e-11	0.13131	0.329	0.217	3.93e-07		COPS7A	2.29e-38	0.209769	0.237	0.068	5.21e-34		EIF2S2	7.45677e-14	0.137358	0.442	0.298	1.69589e-09		DYNC1I2	1.08472e-28	0.223112	0.315	0.125	2.46698e-24		AHR	3.09e-16	0.0980548	0.353	0.235	7.03e-12		TRPV2	3.82e-19	0.181421	0.206	0.095	8.7e-15
ARHGAP21	4.31e-24	0.131239	0.193	0.075	9.81e-20		PTGS1	1.25e-35	0.209446	0.157	0.027	2.83e-31		PRDX3	8.18825e-26	0.137157	0.399	0.217	1.86225e-21		HK1	2.65254e-35	0.223032	0.336	0.12	6.03268e-31		VMP1	1.18e-16	0.0978703	0.518	0.374	2.68e-12		HK1	5.78e-31	0.18128	0.336	0.151	1.31e-26
TMEM179B	1.82e-19	0.131016	0.405	0.244	4.14e-15		CCND1	1.68e-27	0.209435	0.232	0.089	3.82e-23		NT5C2	1.68564e-21	0.136742	0.182	0.072	3.83364e-17		SAMD4B	2.01879e-35	0.222661	0.28	0.087	4.59134e-31		TMED2	3.5e-14	0.0978421	0.353	0.244	7.95e-10		CAPZA2	9.5e-28	0.181095	0.513	0.291	2.16e-23
SERPINB8	3.8e-22	0.13089	0.122	0.033	8.64e-18		TMEM33	3.14e-30	0.209384	0.289	0.119	7.13e-26		TMEM106A	8.44662e-19	0.136721	0.102	0.026	1.92102e-14		EIF2S2	1.12584e-18	0.222366	0.499	0.298	2.56049e-14		MRPL15	3.45e-22	0.0974318	0.203	0.103	7.85e-18		PURB	1.83e-25	0.18106	0.267	0.12	4.17e-21
SEM1	4.97e-18	0.130817	0.637	0.459	1.13e-13		UBE2M	1.19e-34	0.209345	0.385	0.172	2.7e-30		UBL5	5.55983e-12	0.136621	0.738	0.581	1.26447e-07		CHMP5	1.53703e-27	0.221856	0.543	0.281	3.49567e-23		RHEB	2.28e-14	0.097396	0.452	0.325	5.18e-10		MAPK6	2.88e-29	0.181042	0.301	0.135	6.55e-25
VPS25	7.69e-22	0.130815	0.209	0.09	1.75e-17		NAPRT	7.92e-38	0.208914	0.186	0.038	1.8e-33		BMP1	8.04895e-21	0.136462	0.157	0.057	1.83057e-16		SPPL2A	1.01443e-31	0.221815	0.457	0.212	2.30713e-27		SLC36A1	2.34e-14	0.0973042	0.121	0.06	5.31e-10		MSRB1	1.78e-34	0.180976	0.232	0.08	4.05e-30
MICU1	4.15e-21	0.130804	0.153	0.055	9.43e-17		B4GALT1	2.39e-26	0.208479	0.523	0.293	5.44e-22		ARHGAP21	9.15367e-26	0.136094	0.201	0.075	2.08182e-21		YWHAG	3.40172e-34	0.221755	0.36	0.137	7.73653e-30		SRD5A3	1.51e-19	0.0972908	0.155	0.073	3.42e-15		MFSD2A	1.14e-30	0.180864	0.178	0.055	2.59e-26
UBE2A	1.98e-22	0.13077	0.432	0.254	4.51e-18		FOSB	5.59e-27	0.208215	0.739	0.495	1.27e-22		FKBP4	1.06289e-29	0.136037	0.211	0.073	2.41732e-25		STX3	1.61093e-38	0.220363	0.2	0.038	3.66375e-34		ERGIC3	9.37e-15	0.0971912	0.343	0.235	2.13e-10		SGMS2	3.08e-33	0.180857	0.147	0.035	7.01e-29
PCBD1	4.29e-25	0.129902	0.224	0.094	9.76e-21		TMOD2	1.32e-23	0.207978	0.118	0.025	3.01e-19		NUMB	1.68929e-22	0.135773	0.249	0.115	3.84195e-18		SMIM26	3.24577e-24	0.220261	0.548	0.302	7.38184e-20		ARHGAP21	2.08e-21	0.0971847	0.201	0.103	4.72e-17		DOK2	2.2e-17	0.180857	0.232	0.116	5e-13
UBL5	2.05e-11	0.129892	0.733	0.581	4.67e-07		FBXO6	7.14e-29	0.207036	0.209	0.069	1.62e-24		UBAC1	1.27501e-23	0.135755	0.237	0.103	2.89976e-19		PKP3	8.68866e-28	0.219985	0.133	0.022	1.97606e-23		PSMD9	1.87e-16	0.0971729	0.304	0.195	4.26e-12		TMEM127	8.51e-35	0.180466	0.282	0.11	1.94e-30
UBA6	3.26e-22	0.129792	0.216	0.094	7.41e-18		IRF5	1.43e-22	0.206932	0.129	0.033	3.26e-18		NCEH1	6.60041e-21	0.13571	0.107	0.026	1.50113e-16		JAK2	2.94174e-28	0.219971	0.269	0.098	6.6904e-24		LHFPL6	2.2e-13	0.0970221	0.149	0.082	5e-09		CRISPLD2	4.32e-18	0.180285	0.173	0.075	9.83e-14
AXL	1.18e-26	0.129693	0.143	0.037	2.67e-22		ACTR2	1.29e-26	0.206864	0.653	0.402	2.94e-22		TRAFD1	2.23397e-17	0.135679	0.164	0.069	5.08071e-13		DOCK5	7.33007e-41	0.219926	0.211	0.04	1.66708e-36		ATP5MF	5.18e-12	0.0969816	0.598	0.475	1.18e-07		ATP6V1E1	5.12e-29	0.18028	0.381	0.189	1.16e-24
LSM3	1.47e-23	0.129597	0.354	0.191	3.33e-19		OASL	1.35e-17	0.206362	0.376	0.217	3.06e-13		UBE2M	2.11696e-24	0.13551	0.334	0.172	4.81461e-20		PCDH7	1.53667e-30	0.219861	0.143	0.023	3.49485e-26		COPS7A	8.64e-24	0.0969355	0.195	0.094	1.96e-19		PAPSS1	1.94e-27	0.18022	0.33	0.158	4.42e-23
PTGFRN	2.23e-20	0.1293	0.125	0.038	5.08e-16		PLEKHG2	3.66e-24	0.206238	0.257	0.112	8.31e-20		BRK1	1.26294e-19	0.13545	0.552	0.353	2.87229e-15		ARHGEF2	4.67495e-26	0.219732	0.259	0.097	1.06322e-21		GUSB	2.59e-15	0.0967681	0.225	0.136	5.9e-11		ATP5PB	3.28e-18	0.180084	0.519	0.333	7.45e-14
FES	3.59e-17	0.129143	0.127	0.046	8.15e-13		SULT1A1	1.42e-25	0.206179	0.141	0.035	3.23e-21		CHPF	5.74375e-18	0.135263	0.18	0.081	1.3063e-13		PML	6.8561e-33	0.219134	0.389	0.16	1.55928e-28		DVL3	1.36e-18	0.0967026	0.2	0.109	3.1e-14		STX3	1.61e-38	0.179458	0.2	0.055	3.66e-34
GDE1	1.11e-20	0.129139	0.168	0.067	2.53e-16		SPTLC2	3.08e-35	0.206167	0.303	0.113	6.99e-31		YIF1A	6.95809e-19	0.135167	0.306	0.17	1.58248e-14		SLCO1B3	1.54408e-28	0.218934	0.108	0.01	3.51169e-24		VCP	9.86e-12	0.0965761	0.487	0.368	2.24e-07		C11orf96	2.24e-13	0.17917	0.162	0.079	5.09e-09
VDR	3.4e-19	0.129044	0.148	0.056	7.73e-15		ABI3	9.79e-22	0.206004	0.223	0.095	2.23e-17		NUTF2	3.28228e-21	0.135126	0.335	0.185	7.46488e-17		NR1H3	1.43421e-21	0.218892	0.103	0.017	3.26182e-17		DYNC1LI2	3.12e-16	0.0965082	0.278	0.175	7.09e-12		EDEM2	8.41e-28	0.179145	0.22	0.084	1.91e-23
TCF7L2	1.44e-20	0.128991	0.124	0.037	3.28e-16		LRRC59	2.45e-29	0.205992	0.333	0.154	5.58e-25		DYNC1I2	1.18145e-19	0.134754	0.251	0.125	2.68697e-15		TIMM13	8.14784e-30	0.218658	0.342	0.143	1.85306e-25		WDR83OS	1.04e-10	0.0964353	0.586	0.467	2.35e-06		PRKACA	1.24e-30	0.1791	0.229	0.085	2.81e-26
AHCY	3.95e-16	0.128827	0.163	0.075	8.98e-12		SLC25A19	1.12e-18	0.205862	0.134	0.044	2.55e-14		UACA	1.02866e-17	0.134672	0.126	0.044	2.33947e-13		WDFY3	2.96937e-34	0.218429	0.174	0.032	6.75325e-30		LMAN1	3.92e-08	0.0962112	0.355	0.274	0.000891617		GDI1	3.16e-23	0.178914	0.351	0.181	7.18e-19
CCN2	7.28e-12	0.128749	0.147	0.075	1.66e-07		GIMAP8	9.44e-24	0.205739	0.132	0.032	2.15e-19		ENG	2.33914e-25	0.134627	0.219	0.089	5.3199e-21		CSNK1A1	1.32325e-24	0.218092	0.555	0.305	3.00947e-20		SEC11A	1.06e-11	0.0960878	0.435	0.329	2.4e-07		MMP10	2.29e-26	0.17874	0.1	0.019	5.2e-22
CMTM6	6.26e-25	0.128543	0.492	0.294	1.42e-20		HLA-DOA	6.89e-23	0.205652	0.153	0.046	1.57e-18		SMIM26	5.94484e-17	0.134585	0.468	0.302	1.35203e-12		ACTR3	2.60818e-24	0.217646	0.653	0.38	5.93179e-20		CTBP2	3.63e-20	0.0960515	0.172	0.085	8.27e-16		ARHGEF11	4.81e-34	0.178677	0.16	0.041	1.09e-29
GIMAP4	1.66e-11	0.128495	0.218	0.13	3.77e-07		PCDH7	1.32e-27	0.205512	0.126	0.023	3e-23		PA2G4	1.08234e-18	0.134521	0.406	0.248	2.46158e-14		KRT18	6.61224e-19	0.217571	0.182	0.067	1.50382e-14		PYM1	7.06e-15	0.0959243	0.151	0.08	1.61e-10		COL3A1	2.23e-17	0.178489	0.196	0.092	5.07e-13
RHEB	7.59e-22	0.12849	0.447	0.269	1.73e-17		WBP1L	3.99e-29	0.205339	0.172	0.046	9.07e-25		CDC42SE1	2.38793e-19	0.134513	0.442	0.267	5.43088e-15		BNC1	3.44136e-31	0.217434	0.124	0.013	7.82668e-27		ENAH	2.34e-22	0.0958961	0.141	0.059	5.33e-18		RCN1	3.13e-23	0.178351	0.285	0.137	7.12e-19
DDX58	8.67e-17	0.128214	0.26	0.141	1.97e-12		RGS12	1.27e-36	0.205289	0.163	0.028	2.89e-32		UBE2A	2.03055e-23	0.134463	0.441	0.254	4.61809e-19		CTBP2	9.44413e-35	0.217366	0.236	0.064	2.14788e-30		CMAS	3.84e-16	0.0958466	0.21	0.122	8.72e-12		TMBIM6	1.77e-13	0.178304	0.753	0.573	4.02e-09
BEST1	1.15e-12	0.12811	0.151	0.076	2.61e-08		DENND1A	2.54e-26	0.205054	0.196	0.066	5.77e-22		UBE2Z	4.59745e-26	0.134373	0.299	0.142	1.0456e-21		TPX2	1.39247e-14	0.217141	0.153	0.06	3.16689e-10		GOLM1	3.05e-16	0.0958413	0.153	0.079	6.94e-12		YIF1B	1.74e-26	0.178236	0.298	0.142	3.96e-22
VAC14	9.3e-21	0.127824	0.138	0.046	2.12e-16		PSMB7	4.02e-31	0.204956	0.401	0.192	9.13e-27		RHEB	5.77979e-22	0.133995	0.452	0.269	1.3145e-17		SOAT1	7.43187e-37	0.217065	0.295	0.092	1.69023e-32		CLTB	6.06e-14	0.095733	0.353	0.249	1.38e-09		ACTG1	6.91e-11	0.17794	0.87	0.739	1.57e-06
UBE2M	4.49e-24	0.127784	0.33	0.172	1.02e-19		COL12A1	9.71e-20	0.204882	0.154	0.054	2.21e-15		IFFO1	1.39472e-16	0.133924	0.142	0.058	3.17202e-12		SPTLC2	3.17477e-31	0.216646	0.31	0.113	7.22037e-27		TNFRSF6B	1.78e-14	0.0956976	0.132	0.068	4.05e-10		C20orf27	1.12e-34	0.177846	0.302	0.123	2.55e-30
HCFC1R1	3.2e-19	0.127631	0.266	0.139	7.28e-15		PAFAH1B2	3.33e-38	0.204738	0.272	0.09	7.58e-34		FES	1.33589e-17	0.133684	0.129	0.046	3.03821e-13		RBMS1	3.20487e-39	0.21664	0.535	0.232	7.28884e-35		ACP1	1.44e-11	0.095682	0.321	0.229	3.27e-07		VEGFC	2.79e-27	0.177599	0.14	0.04	6.34e-23
TMEM127	8.63e-25	0.127593	0.213	0.086	1.96e-20		NSFL1C	3.07e-38	0.204433	0.261	0.083	6.99e-34		TNFRSF12A	3.47477e-16	0.13363	0.216	0.112	7.90268e-12		ZFYVE16	1.14397e-36	0.21648	0.302	0.098	2.60174e-32		RGS19	1.03e-15	0.0954846	0.217	0.128	2.33e-11		ETHE1	3.31e-29	0.177125	0.375	0.188	7.52e-25
JUP	8.63e-17	0.127503	0.165	0.074	1.96e-12		NRAS	1.03e-32	0.20431	0.255	0.09	2.33e-28		BCL7C	6.53016e-19	0.133358	0.282	0.151	1.48515e-14		IL24	3.70625e-18	0.215817	0.113	0.028	8.42912e-14		VPS9D1	1.73e-18	0.0954467	0.134	0.06	3.92e-14		RGS12	6.26e-38	0.17708	0.183	0.048	1.42e-33
RXRA	2.4e-25	0.127225	0.156	0.047	5.46e-21		ATP5MF	6.21e-26	0.204285	0.652	0.417	1.41e-21		AL138963.4	2.0116e-15	0.133184	0.187	0.093	4.57498e-11		EIF4A1	1.52609e-19	0.215746	0.824	0.607	3.4708e-15		HSP90AB1	3.91e-06	0.0953048	0.809	0.742	0.0889239		FAM200B	1.05e-27	0.176933	0.273	0.118	2.38e-23
NIPSNAP2	8.58e-21	0.12711	0.202	0.088	1.95e-16		SMS	4.39e-32	0.204194	0.367	0.167	9.99e-28		TIMM13	1.78436e-23	0.133155	0.288	0.143	4.05817e-19		UBAC1	1.51317e-37	0.215679	0.316	0.103	3.44141e-33		CPQ	8.23e-12	0.0951755	0.139	0.08	1.87e-07		BID	3.42e-25	0.176918	0.317	0.155	7.77e-21
STOM	7.23e-20	0.126844	0.317	0.173	1.64e-15		FAM83A	6.76e-19	0.203965	0.101	0.024	1.54e-14		MYO1C	3.47325e-25	0.133139	0.21	0.083	7.89921e-21		YIF1B	7.2895e-35	0.215367	0.298	0.101	1.65785e-30		GUK1	1.58e-11	0.0951423	0.68	0.561	3.6e-07		CCN1	2.72e-19	0.176813	0.208	0.093	6.17e-15
SNX24	1.75e-21	0.126733	0.122	0.034	3.98e-17		FKBP4	1.99e-44	0.203919	0.265	0.073	4.52e-40		NDUFS8	5.55062e-20	0.133135	0.416	0.248	1.26238e-15		CES2	5.44932e-27	0.215236	0.185	0.051	1.23934e-22		FES	1.85e-12	0.0949424	0.129	0.07	4.22e-08		UBE2M	1.75e-24	0.176811	0.403	0.221	3.97e-20
NCOA7	2.18e-14	0.126352	0.255	0.148	4.95e-10		ZNF706	1.07e-28	0.203869	0.575	0.33	2.42e-24		SEC31A	2.66126e-22	0.133074	0.335	0.179	6.0525e-18		MAPK13	1.07097e-29	0.214999	0.17	0.037	2.4357e-25		DDA1	1.05e-20	0.0949298	0.247	0.138	2.38e-16		NCF4	1.69e-18	0.176718	0.28	0.146	3.84e-14
C9orf72	3.86e-12	0.126349	0.201	0.114	8.78e-08		AGPAT2	1.1e-38	0.20385	0.272	0.089	2.5e-34		SERPINB8	3.91645e-23	0.133041	0.127	0.033	8.90717e-19		ATP5MF	2.8603e-23	0.214985	0.672	0.417	6.50517e-19		TMBIM6	2.27e-08	0.0947083	0.679	0.573	0.000517165		CCNB2	1.5e-23	0.176124	0.108	0.027	3.41e-19
CYB5A	3.83e-20	0.126349	0.228	0.108	8.72e-16		UBAC1	6.75e-36	0.203524	0.289	0.103	1.54e-31		IGFBP6	1.23066e-18	0.133032	0.105	0.029	2.79889e-14		ERGIC3	1.54922e-27	0.214662	0.397	0.184	3.52339e-23		RREB1	2.32e-18	0.094686	0.183	0.096	5.29e-14		NUMB	1.16e-28	0.176044	0.327	0.153	2.64e-24
LTBP1	9.52e-16	0.126317	0.121	0.046	2.16e-11		LY6K	1.73e-20	0.203029	0.103	0.022	3.94e-16		NDUFS2	9.19894e-26	0.132632	0.289	0.137	2.09212e-21		SGMS2	7.69291e-32	0.214641	0.147	0.023	1.7496e-27		TNFRSF10B	1.3e-13	0.0946736	0.182	0.107	2.95e-09		MRPL28	1.03e-27	0.175937	0.281	0.125	2.35e-23
SPINT1	1.71e-16	0.126306	0.108	0.035	3.89e-12		SEM1	4.93e-28	0.202558	0.702	0.459	1.12e-23		MICU1	1.86533e-22	0.132572	0.159	0.055	4.24231e-18		IER2	9.83634e-22	0.214176	0.721	0.476	2.23708e-17		SULF2	2.98e-19	0.094618	0.178	0.092	6.77e-15		SIGLEC7	5.24e-25	0.175747	0.106	0.024	1.19e-20
RUFY1	1.74e-17	0.12626	0.183	0.084	3.95e-13		LMAN2	3.07e-31	0.202132	0.443	0.223	6.98e-27		PSMA2	4.29106e-14	0.132555	0.567	0.4	9.75916e-10		RAPGEF2	2.56347e-25	0.214147	0.253	0.095	5.83011e-21		P3H1	1.07e-16	0.0944971	0.167	0.089	2.42e-12		APOL6	5.88e-25	0.175049	0.518	0.304	1.34e-20
SMS	3.22e-20	0.126121	0.307	0.167	7.33e-16		IL15RA	7.8e-38	0.20198	0.212	0.053	1.77e-33		FEZ2	2.56065e-27	0.13243	0.248	0.103	5.82369e-23		TPM2	4.50393e-24	0.213868	0.297	0.129	1.02433e-19		PFN2	3.16e-16	0.0942992	0.131	0.064	7.18e-12		ATP6V0E1	5.68e-15	0.174962	0.714	0.519	1.29e-10
UBE2D3	2.04e-13	0.126043	0.669	0.501	4.63e-09		SLC39A1	7.71e-34	0.201808	0.263	0.092	1.75e-29		CYB5R1	2.9072e-17	0.132294	0.169	0.074	6.61184e-13		MAPK6	1.69629e-34	0.213697	0.301	0.103	3.85788e-30		SMIM30	2.86e-17	0.0942502	0.167	0.086	6.51e-13		ACTL6A	3.31e-19	0.174753	0.232	0.115	7.54e-15
SMIM26	1.5e-16	0.125679	0.463	0.302	3.42e-12		TESK1	8.46e-32	0.201389	0.209	0.062	1.92e-27		LATS2	1.88057e-20	0.132212	0.143	0.049	4.27697e-16		BAX	5.75986e-30	0.213672	0.61	0.328	1.30997e-25		SH3TC1	4.54e-13	0.0941783	0.21	0.13	1.03e-08		TNRC18	8.02e-27	0.174507	0.277	0.123	1.82e-22
ECM1	2.64e-21	0.125579	0.136	0.044	6e-17		MAP3K7CL	6.46e-22	0.201093	0.104	0.02	1.47e-17		KIF13A	3.69552e-22	0.132203	0.149	0.049	8.40473e-18		IRF1	1.40412e-14	0.213635	0.725	0.508	3.1934e-10		CLCN7	6.79e-16	0.0940906	0.188	0.106	1.54e-11		CD33	2.95e-24	0.174326	0.105	0.024	6.71e-20
PLOD2	7.8e-17	0.125527	0.141	0.057	1.77e-12		MICU1	5.16e-32	0.200615	0.196	0.055	1.17e-27		DDX58	3.0129e-17	0.132188	0.264	0.141	6.85224e-13		UQCR10	8.12069e-24	0.213453	0.753	0.504	1.84689e-19		SPCS3	1.31e-14	0.0940647	0.48	0.348	2.99e-10		MYL6	6.93e-19	0.174203	0.944	0.867	1.58e-14
MGME1	4.14e-19	0.125477	0.13	0.044	9.42e-15		DSG3	3.15e-24	0.200576	0.103	0.016	7.16e-20		ATP1B1	2.21163e-19	0.132115	0.18	0.076	5.02991e-15		CARD16	5.17441e-26	0.21339	0.491	0.244	1.17682e-21		VPS29	2.45e-15	0.0939394	0.463	0.332	5.56e-11		SLC36A1	1.79e-23	0.174116	0.166	0.06	4.07e-19
PSMD14	4.19e-23	0.125231	0.264	0.127	9.52e-19		ILK	2.02e-41	0.20052	0.361	0.139	4.6e-37		NAA20	8.44728e-24	0.132011	0.267	0.126	1.92116e-19		DNAJC5	9.38456e-43	0.213343	0.263	0.062	2.13433e-38		SLC12A7	2.69e-17	0.0939052	0.153	0.076	6.11e-13		BAIAP2	1.23e-27	0.173928	0.176	0.058	2.79e-23
TRPV2	2.3e-17	0.125073	0.158	0.067	5.22e-13		PLXNB2	1.4e-42	0.200511	0.275	0.084	3.18e-38		REEP3	1.97641e-24	0.131892	0.331	0.17	4.49495e-20		RBMS2	1.53739e-37	0.21316	0.203	0.042	3.49649e-33		NMI	2.99e-18	0.0937324	0.31	0.193	6.8e-14		MAP4	5.23e-19	0.173794	0.372	0.216	1.19e-14
TMED2	2.05e-18	0.124993	0.348	0.203	4.67e-14		EIF2S2	1.48e-19	0.199946	0.484	0.298	3.38e-15		AXL	6.31891e-28	0.131472	0.148	0.037	1.43711e-23		MAPRE1	1.77715e-30	0.213136	0.389	0.168	4.04176e-26		AP2A2	3.93e-15	0.0936787	0.185	0.105	8.93e-11		SH3GL1	3.61e-27	0.173783	0.234	0.095	8.22e-23
TPMT	3.64e-23	0.124952	0.184	0.071	8.27e-19		STAT5A	3.44e-26	0.199717	0.265	0.11	7.81e-22		KRT18	5.65213e-10	0.131437	0.129	0.067	1.28546e-05		PA2G4	1.3193e-24	0.213119	0.469	0.248	3.00049e-20		LAGE3	2.33e-16	0.0936541	0.257	0.158	5.31e-12		POR	1.86e-18	0.173549	0.222	0.107	4.23e-14
AGRN	5.71e-23	0.124677	0.183	0.071	1.3e-18		RPN1	3.84e-26	0.199691	0.456	0.251	8.72e-22		COX5B	7.51994e-16	0.131409	0.723	0.537	1.71026e-11		CAPN1	8.35045e-30	0.213105	0.316	0.124	1.89914e-25		IRAK1	6.62e-22	0.0935494	0.281	0.161	1.51e-17		MIR29B2CHG	1.44e-06	0.173476	0.152	0.097	0.0326364
ABR	1.55e-20	0.124369	0.192	0.082	3.52e-16		TRIM25	5.89e-29	0.199614	0.279	0.112	1.34e-24		VPS25	1.33191e-22	0.131408	0.214	0.09	3.02916e-18		CEP68	2.27045e-22	0.212995	0.176	0.056	5.16367e-18		PURB	1.24e-16	0.0935492	0.209	0.12	2.82e-12		ERGIC1	1.5e-28	0.17338	0.318	0.145	3.41e-24
YIF1A	8.56e-18	0.124358	0.298	0.17	1.95e-13		YWHAG	3.62e-34	0.19957	0.337	0.137	8.24e-30		TMED2	4.73313e-19	0.131386	0.353	0.203	1.07645e-14		PTPRF	2.17154e-24	0.212969	0.148	0.035	4.93874e-20		MYO1E	2.44e-16	0.0934819	0.23	0.138	5.55e-12		ACSL4	5.98e-31	0.173152	0.358	0.169	1.36e-26
NAA20	4.95e-22	0.124215	0.258	0.126	1.13e-17		ZBED1	4.98e-26	0.19956	0.181	0.058	1.13e-21		PLBD1	9.56402e-21	0.131343	0.107	0.026	2.17514e-16		RREB1	3.41927e-35	0.212956	0.263	0.078	7.77645e-31		TCEAL9	4.54e-19	0.0934565	0.204	0.111	1.03e-14		ITPR2	8.48e-28	0.173144	0.39	0.196	1.93e-23
PSMA3	2.6e-21	0.124006	0.42	0.248	5.91e-17		BACH1	2e-28	0.199455	0.388	0.189	4.54e-24		TSPAN4	5.84333e-30	0.131332	0.198	0.064	1.32895e-25		PYGL	1.54769e-38	0.212947	0.198	0.038	3.51992e-34		UBE2A	1.38e-17	0.0934432	0.441	0.302	3.15e-13		SIDT2	5.69e-23	0.173138	0.204	0.085	1.29e-18
RCBTB2	1.8e-19	0.123997	0.136	0.047	4.08e-15		LATS2	2.65e-29	0.199336	0.177	0.049	6.03e-25		NCSTN	1.13186e-24	0.131279	0.226	0.094	2.5742e-20		ETHE1	3.82041e-32	0.212607	0.375	0.156	8.68875e-28		MYCBP	6.99e-16	0.093363	0.212	0.124	1.59e-11		ARHGEF2	1.5e-21	0.173068	0.259	0.124	3.42e-17
PLD1	2.67e-18	0.123878	0.108	0.032	6.08e-14		WDR45B	2.19e-35	0.198895	0.323	0.126	4.97e-31		CARD19	8.55717e-21	0.131078	0.217	0.097	1.94616e-16		N4BP2L1	6.41621e-15	0.212559	0.225	0.106	1.45924e-10		STK3	5.34e-23	0.093358	0.142	0.057	1.21e-18		MT-ND5	1.44e-08	0.172596	0.958	0.89	0.000327706
NCSTN	1.88e-23	0.12348	0.22	0.094	4.27e-19		TWISTNB	3.09e-19	0.19889	0.335	0.18	7.02e-15		KIF1B	7.49547e-26	0.130968	0.216	0.085	1.70469e-21		TWISTNB	2.6588e-15	0.212375	0.332	0.18	6.04691e-11		NAPRT	6.87e-21	0.0932991	0.136	0.057	1.56e-16		DNASE2	8e-29	0.172483	0.237	0.093	1.82e-24
PSMA2	3.56e-14	0.12345	0.565	0.4	8.1e-10		SOAT1	3.56e-36	0.198385	0.273	0.092	8.1e-32		PPARD	3.18085e-23	0.130838	0.147	0.045	7.2342e-19		PDLIM5	6.13031e-31	0.212303	0.325	0.126	1.39422e-26		BCAM	1.63e-16	0.0931648	0.106	0.045	3.71e-12		LTB4R	1.42e-29	0.172472	0.149	0.041	3.24e-25
SMIM30	5.45e-21	0.123402	0.161	0.06	1.24e-16		TRPV2	3.39e-26	0.198087	0.197	0.067	7.7e-22		CKAP5	1.69539e-19	0.130824	0.19	0.082	3.85582e-15		NFKB2	7.8936e-33	0.212294	0.465	0.211	1.79524e-28		GSAP	8.97e-14	0.0931338	0.159	0.089	2.04e-09		PLEKHO2	1.64e-20	0.17219	0.177	0.072	3.73e-16
NRAS	2.57e-19	0.123322	0.198	0.09	5.84e-15		SNAI2	2.09e-26	0.197954	0.165	0.047	4.76e-22		RIN3	4.99479e-20	0.130821	0.171	0.068	1.13597e-15		ITPRID2	1.05147e-31	0.212053	0.253	0.08	2.39135e-27		MAGOHB	5.03e-18	0.0930972	0.198	0.11	1.14e-13		KTN1	1.09e-15	0.172041	0.584	0.415	2.48e-11
SSR3	4.11e-10	0.123292	0.462	0.339	9.35e-06		PKP1	2.58e-21	0.197927	0.111	0.025	5.87e-17		TCF7L2	7.75915e-22	0.130773	0.13	0.037	1.76466e-17		PAPSS1	2.05769e-31	0.211952	0.33	0.127	4.67979e-27		AHCYL1	4.91e-18	0.09305	0.286	0.176	1.12e-13		KLK10	1.08e-28	0.171814	0.119	0.026	2.45e-24
WBP1L	8.67e-19	0.123093	0.132	0.046	1.97e-14		ETV7	2.97e-36	0.197628	0.229	0.067	6.75e-32		CYB5A	6.70056e-21	0.130711	0.234	0.108	1.52391e-16		SULT1A1	8.0789e-21	0.211433	0.134	0.035	1.83739e-16		TAX1BP3	1.48e-16	0.0930458	0.264	0.164	3.38e-12		SIL1	2.38e-27	0.171781	0.222	0.087	5.42e-23
SCCPDH	6.52e-22	0.122939	0.147	0.049	1.48e-17		ARL8A	2.59e-43	0.197482	0.254	0.067	5.9e-39		LY6E	6.59968e-14	0.130645	0.834	0.697	1.50097e-09		IL15RA	1.52825e-38	0.211183	0.229	0.053	3.4757e-34		PAK1IP1	2.36e-17	0.0930046	0.139	0.066	5.37e-13		C19orf38	4.9e-21	0.171644	0.115	0.034	1.12e-16
BCL7C	1.43e-17	0.12273	0.274	0.151	3.24e-13		ARHGAP27	1.59e-24	0.197412	0.195	0.069	3.62e-20		MRPL13	8.60874e-21	0.130348	0.285	0.149	1.95789e-16		DENND1A	3.83836e-25	0.211163	0.205	0.066	8.72958e-21		NCEH1	4.22e-16	0.0928731	0.107	0.046	9.6e-12		UBAC1	7.1e-34	0.17158	0.316	0.133	1.61e-29
TMEM33	7.51e-19	0.122655	0.235	0.119	1.71e-14		PPP2CB	9e-37	0.197326	0.321	0.125	2.05e-32		DSG2	9.69335e-17	0.130116	0.1	0.029	2.20456e-12		EI24	8.24324e-20	0.210848	0.262	0.118	1.87476e-15		CAPN1	8.74e-17	0.092813	0.251	0.154	1.99e-12		BAX	1.09e-23	0.171463	0.61	0.384	2.47e-19
MT1F	5.75e-12	0.122621	0.241	0.144	1.31e-07		VKORC1	2.09e-29	0.197296	0.424	0.216	4.76e-25		VAC14	1.20932e-22	0.129618	0.146	0.046	2.75036e-18		DSG2	1.86449e-27	0.210753	0.146	0.029	4.24042e-23		DNMT1	1.28e-18	0.0927124	0.306	0.19	2.92e-14		SCAF1	2.54e-32	0.171406	0.231	0.083	5.77e-28
CARD19	5.27e-20	0.122613	0.212	0.097	1.2e-15		ST13	8.86e-24	0.197239	0.453	0.254	2.01e-19		RXRA	1.25905e-27	0.129513	0.164	0.047	2.86346e-23		MIIP	2.53592e-32	0.21059	0.284	0.096	5.76743e-28		EMC4	1.81e-14	0.0927058	0.326	0.222	4.12e-10		GIMAP8	4.27e-18	0.171378	0.133	0.049	9.71e-14
REEP3	4.17e-22	0.12257	0.318	0.17	9.47e-18		MFAP2	5.84e-21	0.196965	0.163	0.058	1.33e-16		CDC25B	1.02892e-18	0.129429	0.182	0.08	2.34007e-14		GLB1	5.88894e-32	0.210121	0.24	0.071	1.33932e-27		DDX58	3.46e-12	0.0926816	0.264	0.175	7.88e-08		MYD88	2.23e-21	0.17097	0.284	0.141	5.07e-17
TMEM50A	5.81e-17	0.122323	0.506	0.332	1.32e-12		JAK2	3.52e-28	0.196962	0.251	0.098	8e-24		TEAD1	4.70909e-20	0.129406	0.155	0.058	1.07099e-15		ZNFX1	1.09419e-32	0.210052	0.415	0.178	2.48851e-28		CYB5A	2.4e-15	0.0926665	0.234	0.142	5.45e-11		DENND1A	5.92e-21	0.17089	0.205	0.09	1.35e-16
VAT1	1.86e-21	0.122315	0.165	0.062	4.23e-17		ITPRID2	2.99e-31	0.196696	0.235	0.08	6.81e-27		OASL	4.0194e-11	0.129374	0.33	0.217	9.14133e-07		MRPS5	9.25457e-25	0.209995	0.335	0.151	2.10477e-20		TRAF1	1.93e-07	0.0926306	0.219	0.159	0.00438109		CTNS	1.96e-23	0.170593	0.118	0.032	4.46e-19
GALK1	1.52e-16	0.122204	0.171	0.078	3.45e-12		WNT5A	7.66e-22	0.196583	0.142	0.042	1.74e-17		TPMT	1.03201e-24	0.129325	0.192	0.071	2.34709e-20		LMO2	2.36916e-27	0.209926	0.203	0.059	5.38818e-23		EPN1	6.35e-21	0.0926082	0.242	0.134	1.44e-16		AP1S2	2.22e-16	0.17054	0.263	0.143	5.05e-12
HLA-A	6.37e-09	0.122004	0.956	0.91	0.0001449		NT5E	2.17e-21	0.196382	0.181	0.068	4.94e-17		OSMR	1.7261e-21	0.129095	0.135	0.042	3.92567e-17		RIN3	9.43769e-28	0.209739	0.219	0.068	2.14641e-23		ADRM1	5.5e-18	0.0926009	0.322	0.203	1.25e-13		PCLAF	2.09e-18	0.170457	0.162	0.067	4.75e-14
SNF8	9.63e-21	0.121892	0.294	0.156	2.19e-16		GMPR	2.29e-24	0.196214	0.134	0.033	5.21e-20		ECM1	3.92089e-22	0.129071	0.14	0.044	8.91727e-18		SNAI2	5.20945e-28	0.20947	0.182	0.047	1.18479e-23		PML	4.21e-17	0.0925955	0.325	0.21	9.56e-13		HLA-DOA	3.94e-21	0.170447	0.171	0.068	8.97e-17
ARHGEF2	2.73e-16	0.121783	0.195	0.097	6.21e-12		ATP5F1E	4.25e-18	0.195952	0.933	0.807	9.66e-14		IL17RA	5.34436e-24	0.128976	0.229	0.097	1.21547e-19		PURB	3.7397e-30	0.209244	0.267	0.091	8.5052e-26		PSENEN	1.69e-18	0.0925939	0.308	0.192	3.85e-14		LYSMD2	5.81e-28	0.170389	0.336	0.16	1.32e-23
REEP4	1.57e-18	0.121589	0.143	0.053	3.57e-14		SPINT1	3.06e-29	0.195842	0.154	0.035	6.97e-25		SMIM30	4.21683e-22	0.12892	0.167	0.06	9.59033e-18		RDX	1.22992e-29	0.209233	0.271	0.096	2.79721e-25		MAP1B	8.67e-09	0.0924236	0.119	0.072	0.000197128		CD302	2.96e-19	0.170061	0.171	0.072	6.74e-15
PSMB10	5.75e-16	0.121573	0.553	0.375	1.31e-11		CSNK1A1	2.36e-26	0.195799	0.535	0.305	5.37e-22		COA6	1.18295e-25	0.128918	0.222	0.087	2.69038e-21		GAB2	7.08613e-25	0.209168	0.131	0.026	1.6116e-20		SDF2	8.71e-14	0.0923289	0.26	0.168	1.98e-09		ILF2	3.19e-26	0.169972	0.375	0.193	7.26e-22
CKS1B	3.89e-12	0.121516	0.17	0.092	8.84e-08		FAT1	1.12e-25	0.19543	0.156	0.044	2.54e-21		HCFC1R1	3.17045e-20	0.128576	0.272	0.139	7.21055e-16		TMOD2	8.57429e-23	0.208851	0.123	0.025	1.95005e-18		ZNF358	9.06e-19	0.0922831	0.127	0.055	2.06e-14		EBNA1BP2	1.05e-18	0.169772	0.235	0.118	2.4e-14
SOAT1	5.76e-24	0.121472	0.219	0.092	1.31e-19		PRDX3	3.09e-35	0.195352	0.451	0.217	7.02e-31		PPP2CB	5.13994e-26	0.128407	0.273	0.125	1.16898e-21		UBE2M	2.94856e-32	0.208764	0.403	0.172	6.7059e-28		NR2F2	6.8e-15	0.0922561	0.121	0.058	1.55e-10		GPX3	1.67e-22	0.16958	0.131	0.041	3.81e-18
PRDX3	1.39e-24	0.121337	0.391	0.217	3.16e-20		STX3	2.94e-31	0.195038	0.165	0.038	6.68e-27		CYC1	1.10101e-18	0.12814	0.302	0.168	2.50402e-14		MYD88	6.21627e-25	0.208704	0.284	0.114	1.41377e-20		COA3	2.86e-16	0.0919679	0.307	0.199	6.51e-12		ATP5PD	2.96e-19	0.169406	0.641	0.426	6.72e-15
LATS2	6.91e-19	0.121289	0.137	0.049	1.57e-14		UBE2D3	1.95e-21	0.195009	0.727	0.501	4.44e-17		PCLAF	3.82797e-11	0.128112	0.128	0.062	8.70596e-07		ADAM10	9.30705e-35	0.208115	0.373	0.144	2.1167e-30		NBL1	6.3e-14	0.0918736	0.191	0.113	1.43e-09		NSFL1C	1.98e-32	0.169288	0.274	0.11	4.51e-28
GET3	7.78e-22	0.121251	0.229	0.105	1.77e-17		CCNB1	4.02e-18	0.194939	0.109	0.03	9.14e-14		STOM	1.3109e-20	0.127826	0.323	0.173	2.98139e-16		HSD17B4	8.95413e-34	0.207998	0.232	0.064	2.03644e-29		NDUFA9	8.27e-15	0.0918667	0.269	0.174	1.88e-10		TWF2	8.42e-23	0.169036	0.352	0.185	1.92e-18
DBI	5.82e-17	0.121238	0.584	0.4	1.32e-12		NFKBID	6.76e-31	0.194771	0.362	0.166	1.54e-26		P4HA1	6.69321e-22	0.127577	0.207	0.087	1.52224e-17		MT1M	7.11e-20	0.207443	0.118	0.027	1.61703e-15		TPMT	3e-20	0.0918249	0.192	0.099	6.83e-16		RNH1	4.51e-29	0.168963	0.427	0.221	1.03e-24
PPARD	3.81e-21	0.121171	0.138	0.045	8.66e-17		CES2	2.12e-26	0.194675	0.171	0.051	4.83e-22		IL15RA	1.28081e-25	0.127443	0.167	0.053	2.91294e-21		OLFML3	1.18823e-23	0.207428	0.145	0.035	2.7024e-19		SH3PXD2A	3.13e-15	0.0916993	0.155	0.082	7.13e-11		RCN3	1.77e-22	0.168943	0.187	0.074	4.03e-18
RAD23A	7.44e-21	0.121163	0.409	0.241	1.69e-16		IGFBP7	2.08e-25	0.194356	0.28	0.124	4.74e-21		P4HA2	2.56641e-24	0.127434	0.157	0.049	5.83679e-20		GIMAP4	4.05539e-18	0.207405	0.277	0.13	9.22318e-14		NR4A3	1.75e-09	0.091691	0.375	0.286	3.97e-05		RCBTB2	2.94e-21	0.168843	0.189	0.078	6.68e-17
COX5B	9.63e-15	0.121041	0.712	0.537	2.19e-10		PPA1	6.28e-22	0.194252	0.503	0.308	1.43e-17		PCBD1	3.24507e-26	0.127202	0.231	0.094	7.38027e-22		STOM	1.40485e-31	0.207177	0.41	0.173	3.19504e-27		UACA	2.09e-15	0.0916724	0.126	0.061	4.75e-11		HEPHL1	1.53e-35	0.1688	0.106	0.013	3.48e-31
AMDHD2	6.86e-19	0.120862	0.137	0.049	1.56e-14		VPS29	4.58e-31	0.194089	0.522	0.282	1.04e-26		SRGAP2	5.21598e-16	0.127104	0.18	0.086	1.18627e-11		VDAC1	4.60362e-25	0.207139	0.551	0.307	1.047e-20		UBAC1	1.95e-19	0.0916562	0.237	0.133	4.44e-15		HK2	2.82e-26	0.168793	0.155	0.048	6.41e-22
DPYD	9.91e-24	0.120848	0.26	0.121	2.25e-19		AP1S2	1.24e-18	0.193765	0.246	0.121	2.82e-14		SNX24	4.81822e-23	0.126831	0.128	0.034	1.09581e-18		TMEM106A	3.28974e-29	0.207067	0.146	0.026	7.48186e-25		NDUFA12	1.3e-15	0.0915127	0.399	0.277	2.95e-11		SEC61A1	4.49e-23	0.168763	0.41	0.232	1.02e-18
PPP2CB	6.16e-24	0.120801	0.263	0.125	1.4e-19		TGM2	1.38e-40	0.19327	0.251	0.072	3.14e-36		FBXO6	4.07044e-18	0.126796	0.165	0.069	9.2574e-14		TM9SF2	3.69294e-26	0.206636	0.478	0.244	8.39885e-22		EHD1	3.42e-11	0.091373	0.22	0.143	7.77e-07		GLO1	1.54e-22	0.168615	0.335	0.183	3.5e-18
TSPAN4	6.55e-28	0.120792	0.189	0.064	1.49e-23		ITPK1	4.79e-31	0.192473	0.209	0.064	1.09e-26		BEST1	7.51746e-13	0.126794	0.154	0.076	1.7097e-08		ENG	4.35337e-35	0.206342	0.279	0.089	9.90086e-31		REEP5	2.87e-13	0.0912738	0.499	0.366	6.53e-09		MYO15B	6.14e-13	0.168431	0.125	0.056	1.4e-08
RPS6KA1	1.07e-20	0.120746	0.137	0.044	2.44e-16		KIF13A	2.61e-31	0.192391	0.183	0.049	5.94e-27		ATN1	1.17408e-23	0.126587	0.216	0.09	2.67021e-19		TNRC18	1.37391e-30	0.206159	0.277	0.096	3.12469e-26		MANBA	8.46e-15	0.0912718	0.262	0.167	1.93e-10		DPH3	4.08e-37	0.168401	0.352	0.149	9.28e-33
ETV7	1.08e-22	0.120731	0.176	0.067	2.46e-18		STARD8	4.09e-23	0.192375	0.113	0.024	9.29e-19		CHMP4B	2.36588e-23	0.126555	0.322	0.166	5.38071e-19		OSBPL11	1.13751e-27	0.206059	0.208	0.062	2.58705e-23		FHL2	9.17e-16	0.0912089	0.123	0.058	2.09e-11		INSIG1	3.27e-16	0.168286	0.338	0.196	7.44e-12
RBMS1	6.31e-27	0.12056	0.428	0.232	1.43e-22		VASH1	4.33e-24	0.19202	0.154	0.045	9.84e-20		EDEM2	2.06427e-24	0.126171	0.175	0.06	4.69478e-20		RGS12	1.61397e-39	0.205731	0.183	0.028	3.67066e-35		CDC42SE1	1.86e-12	0.0911435	0.442	0.322	4.24e-08		TMEM106C	6.06e-17	0.168237	0.189	0.089	1.38e-12
CAPRIN1	2.34e-19	0.120113	0.327	0.184	5.31e-15		S100A13	6.41e-27	0.191716	0.307	0.139	1.46e-22		INSIG1	2.62403e-15	0.125948	0.284	0.162	5.96784e-11		C20orf27	2.67216e-35	0.205646	0.302	0.101	6.07728e-31		GMPR	1.8e-14	0.0911417	0.107	0.049	4.08e-10		ALDH3B1	3.08e-19	0.168235	0.102	0.03	7.02e-15
COA6	1.47e-23	0.120057	0.212	0.087	3.34e-19		SAMD4B	7.99e-37	0.191455	0.266	0.087	1.82e-32		CES2	7.97171e-17	0.125898	0.133	0.051	1.81301e-12		ST8SIA4	4.43585e-18	0.205418	0.238	0.106	1.00885e-13		CCDC47	3.68e-18	0.091114	0.311	0.197	8.36e-14		CYC1	6.46e-20	0.168158	0.344	0.195	1.47e-15
MGLL	3.79e-18	0.120013	0.136	0.051	8.63e-14		PHACTR4	6.15e-31	0.190235	0.266	0.1	1.4e-26		C9orf72	1.49617e-11	0.125774	0.2	0.114	3.40274e-07		TMEM127	2.68903e-36	0.205208	0.282	0.086	6.11566e-32		EXT1	9.07e-19	0.0910457	0.144	0.067	2.06e-14		IL20RB	4.7e-39	0.168018	0.121	0.016	1.07e-34
EIF2AK4	1.14e-18	0.11966	0.199	0.093	2.59e-14		GLB1	9.13e-34	0.190215	0.23	0.071	2.08e-29		ABI3	7.62363e-13	0.125512	0.18	0.095	1.73384e-08		PSMA3	1.02863e-25	0.204832	0.481	0.248	2.33942e-21		MRPS16	2.18e-15	0.0909567	0.289	0.186	4.96e-11		KLF5	1.11e-21	0.167919	0.155	0.056	2.53e-17
LASP1	6.01e-22	0.119523	0.273	0.136	1.37e-17		TUBGCP2	5.2e-34	0.189946	0.362	0.157	1.18e-29		PARVA	1.56879e-19	0.125432	0.144	0.052	3.5679e-15		ALDH3B1	4.11002e-24	0.204444	0.102	0.013	9.34743e-20		RILP	2.72e-14	0.0907761	0.14	0.073	6.18e-10		SULT1A1	3.97e-15	0.167786	0.134	0.057	9.02e-11
CDC25B	3.44e-17	0.119511	0.175	0.08	7.82e-13		DNAJC5	2.05e-40	0.189844	0.237	0.062	4.67e-36		TMEM165	1.72622e-18	0.125422	0.453	0.283	3.92594e-14		ATN1	8.1694e-34	0.204332	0.278	0.09	1.85797e-29		ARHGEF11	1.41e-20	0.0905833	0.11	0.041	3.2e-16		COA6	6.74e-31	0.167607	0.278	0.115	1.53e-26
DNAJC13	6.59e-19	0.119488	0.159	0.063	1.5e-14		ETF1	5.44e-33	0.189481	0.398	0.18	1.24e-28		TRPV2	1.51771e-17	0.12514	0.16	0.067	3.45174e-13		PLEKHO2	2.62595e-24	0.204098	0.177	0.051	5.9722e-20		PXDN	5.18e-16	0.0905225	0.14	0.07	1.18e-11		TLR1	3.4e-23	0.167425	0.134	0.041	7.74e-19
TIMM13	2.77e-22	0.119388	0.281	0.143	6.3e-18		SMIM30	2.29e-32	0.189469	0.207	0.06	5.21e-28		PPIC	9.89899e-21	0.124796	0.176	0.07	2.25133e-16		ACER3	9.03005e-38	0.204048	0.273	0.078	2.0537e-33		FKBP9	1.28e-18	0.0904033	0.143	0.067	2.92e-14		ANXA3	2.31e-30	0.167214	0.144	0.037	5.26e-26
CISD3	2.6e-21	0.119304	0.267	0.133	5.92e-17		REEP4	1.26e-30	0.189222	0.191	0.053	2.87e-26		ETV7	2.34213e-24	0.124783	0.183	0.067	5.3267e-20		HK2	4.09554e-27	0.203918	0.155	0.034	9.31449e-23		OS9	1.81e-16	0.0903984	0.385	0.26	4.13e-12		ITPK1	6.92e-30	0.167163	0.237	0.091	1.57e-25
RAPGEF2	9.37e-19	0.119123	0.202	0.095	2.13e-14		OSBPL11	1.01e-26	0.189168	0.191	0.062	2.29e-22		RAPGEF1	3.0749e-17	0.124763	0.338	0.197	6.99324e-13		ATP5PB	4.06131e-23	0.203714	0.519	0.281	9.23665e-19		GGH	1.05e-17	0.0903661	0.13	0.059	2.4e-13		ZNF106	5.35e-26	0.166765	0.325	0.157	1.22e-21
SULT1A1	2.06e-15	0.118969	0.103	0.035	4.68e-11		OAS2	9.38e-33	0.189099	0.461	0.225	2.13e-28		LAMA4	1.41616e-08	0.124686	0.117	0.063	0.000322078		TFDP1	7.07811e-31	0.203439	0.315	0.119	1.60978e-26		CPPED1	8.83e-19	0.0903364	0.157	0.077	2.01e-14		RND3	4.46e-23	0.166669	0.216	0.092	1.01e-18
MRPL13	3.99e-19	0.118859	0.277	0.149	9.07e-15		SCARF1	1.59e-19	0.188989	0.109	0.027	3.62e-15		RHOD	2.71009e-10	0.124614	0.1	0.044	6.16355e-06		GMPR	5.839e-23	0.203306	0.139	0.033	1.32796e-18		DENND3	4.87e-14	0.090264	0.213	0.13	1.11e-09		SBF2	9.68e-32	0.166637	0.254	0.098	2.2e-27
PTPN18	2.42e-15	0.118787	0.222	0.119	5.5e-11		RAB2A	2.34e-23	0.188901	0.471	0.272	5.33e-19		IRF2BP2	3.51987e-19	0.124445	0.407	0.241	8.00525e-15		LTB4R	1.86017e-31	0.203229	0.149	0.024	4.23058e-27		G6PC3	2.22e-18	0.0902403	0.167	0.085	5.04e-14		CCDC47	7.16e-28	0.166574	0.385	0.197	1.63e-23
PSMC2	3.01e-24	0.118787	0.253	0.116	6.85e-20		PCBD1	3.19e-37	0.18886	0.277	0.094	7.26e-33		LASP1	3.91374e-23	0.124301	0.28	0.136	8.90103e-19		THBS2	1.84934e-23	0.203208	0.146	0.035	4.20595e-19		SLC35B2	2.75e-19	0.0902347	0.223	0.124	6.26e-15		CTHRC1	4.32e-11	0.166502	0.154	0.081	9.83e-07
GEM	4.97e-09	0.118748	0.133	0.074	0.000112983		VDAC1	1.55e-27	0.188495	0.532	0.307	3.52e-23		ITPRID2	7.80768e-21	0.124225	0.192	0.08	1.7757e-16		NSFL1C	2.2889e-36	0.203033	0.274	0.083	5.20564e-32		C1orf122	3.51e-19	0.0900344	0.339	0.219	7.99e-15		NDUFV3	2.03e-30	0.166226	0.324	0.146	4.61e-26
CHPF	8.63e-16	0.118712	0.171	0.081	1.96e-11		PSMA3	4.32e-28	0.188089	0.466	0.248	9.83e-24		PSMB10	2.47496e-16	0.124046	0.559	0.375	5.6288e-12		SERF2	2.68878e-21	0.202995	0.951	0.835	6.1151e-17		NDUFB1	7.89e-11	0.0899824	0.488	0.37	1.79e-06		TM9SF2	7.83e-19	0.166224	0.478	0.297	1.78e-14
CHMP4B	2.96e-22	0.11869	0.315	0.166	6.74e-18		HEBP1	9.17e-42	0.188077	0.251	0.069	2.09e-37		RER1	2.50506e-20	0.124014	0.42	0.253	5.69726e-16		CAPNS1	1.13793e-26	0.202474	0.538	0.285	2.588e-22		ACTL6A	1.18e-11	0.0898989	0.183	0.115	2.69e-07		CALD1	1.53e-21	0.166092	0.311	0.161	3.47e-17
LMAN2	1.07e-20	0.118447	0.382	0.223	2.43e-16		EGR3	1.01e-19	0.187927	0.166	0.062	2.29e-15		SNX5	1.81292e-20	0.123881	0.326	0.177	4.12313e-16		ALDOA	5.42287e-20	0.202359	0.56	0.346	1.23332e-15		HDAC2	6.8e-17	0.089764	0.245	0.147	1.55e-12		RAPGEF2	7.54e-18	0.165889	0.253	0.131	1.71e-13
OSMR	3.25e-20	0.118388	0.129	0.042	7.39e-16		EAF1	4.59e-23	0.187766	0.186	0.067	1.04e-18		ENTPD1	3.21969e-15	0.123701	0.271	0.153	7.32254e-11		TUT7	4.85093e-30	0.202097	0.274	0.095	1.10325e-25		ALG3	4.91e-16	0.0897539	0.192	0.11	1.12e-11		TFAP2A	1.46e-34	0.165547	0.119	0.02	3.31e-30
CKAP5	4.96e-18	0.118287	0.183	0.082	1.13e-13		MAP1B	4.76e-09	0.187763	0.11	0.053	0.000108197		CDK2AP1	5.96508e-25	0.1237	0.316	0.16	1.35664e-20		ETV7	3.97812e-34	0.201904	0.238	0.067	9.04745e-30		EFCAB14	2.51e-13	0.089719	0.292	0.195	5.71e-09		NR4A1	5.57e-29	0.16541	0.603	0.358	1.27e-24
ING1	2.68e-14	0.118223	0.116	0.046	6.08e-10		GNPTG	2.04e-35	0.187733	0.331	0.133	4.65e-31		SORBS3	6.55343e-25	0.12354	0.176	0.06	1.49045e-20		MFAP2	6.51935e-23	0.201874	0.183	0.058	1.4827e-18		SMIM20	3.73e-17	0.0896825	0.184	0.098	8.49e-13		ETV7	2.82e-30	0.165358	0.238	0.092	6.41e-26
KIF13A	6.91e-20	0.117992	0.14	0.049	1.57e-15		MXRA5	3.9e-24	0.187475	0.138	0.035	8.87e-20		PSMB6	2.17242e-18	0.12344	0.505	0.326	4.94072e-14		PCBD1	7.20262e-39	0.201663	0.303	0.094	1.63809e-34		TRIM69	1.08e-17	0.0896585	0.217	0.123	2.45e-13		OSBPL11	6.52e-23	0.165267	0.208	0.087	1.48e-18
TFDP1	4.83e-21	0.117976	0.246	0.119	1.1e-16		ETHE1	1.85e-33	0.187268	0.356	0.156	4.22e-29		DPYD	4.98913e-25	0.123294	0.268	0.121	1.13468e-20		CKS1B	4.44474e-19	0.201588	0.22	0.092	1.01087e-14		ENG	1.96e-17	0.0896412	0.219	0.126	4.45e-13		MRPL37	2.01e-23	0.165044	0.284	0.139	4.57e-19
SELENOT	1.37e-18	0.117976	0.404	0.243	3.11e-14		HMGA1	6.07e-25	0.187238	0.336	0.167	1.38e-20		TMEM35B	3.29534e-17	0.122984	0.321	0.185	7.4946e-13		ASAP1	5.27916e-39	0.201403	0.304	0.094	1.20064e-34		LASP1	5.04e-18	0.0896275	0.28	0.172	1.15e-13		MAGEA4	1.35e-38	0.164901	0.11	0.012	3.07e-34
SCNM1	3.79e-19	0.11775	0.247	0.124	8.61e-15		GOLIM4	2.89e-33	0.186402	0.21	0.062	6.58e-29		ACTR1A	6.30871e-22	0.122962	0.262	0.126	1.43479e-17		CKAP5	6.00664e-30	0.201378	0.253	0.082	1.36609e-25		ECM1	2.61e-16	0.0896112	0.14	0.069	5.93e-12		VDAC1	2.47e-20	0.164763	0.551	0.357	5.61e-16
RBP1	1.19e-13	0.117711	0.161	0.08	2.71e-09		MFSD14B	2.48e-32	0.186384	0.215	0.065	5.65e-28		AFF4	4.47554e-19	0.122918	0.407	0.239	1.01787e-14		GIMAP8	1.71337e-21	0.201359	0.133	0.032	3.89672e-17		UBE2Z	4.21e-17	0.089599	0.299	0.189	9.58e-13		YWHAG	2.14e-28	0.164727	0.36	0.175	4.88e-24
RASD1	6.69e-07	0.117316	0.103	0.059	0.0152092		UBE2A	1.13e-30	0.186372	0.488	0.254	2.57e-26		HDLBP	1.01947e-17	0.122894	0.374	0.228	2.31859e-13		MYL9	6.33934e-23	0.201325	0.216	0.077	1.44176e-18		PPFIA1	7.81e-16	0.0895784	0.237	0.144	1.78e-11		SOAT1	9.32e-28	0.164373	0.295	0.132	2.12e-23
CD47	9.99e-12	0.117192	0.506	0.359	2.27e-07		FUOM	2.24e-37	0.186284	0.312	0.115	5.1e-33		TMEM179B	2.32544e-19	0.122775	0.408	0.244	5.28875e-15		WIPI2	1.77692e-27	0.201239	0.288	0.11	4.04124e-23		IRS2	1.33e-13	0.089385	0.212	0.13	3.03e-09		GLB1	3.09e-26	0.163799	0.24	0.1	7.02e-22
GTF2H5	1.63e-20	0.117164	0.321	0.178	3.72e-16		AL138963.4	5.32e-22	0.186192	0.22	0.093	1.21e-17		PSMD14	1.8583e-23	0.122517	0.268	0.127	4.22633e-19		CYB5R4	2.07193e-26	0.200884	0.249	0.088	4.71219e-22		HLA-C	6.44e-06	0.0893632	0.963	0.933	0.146398		ECT2	2.76e-30	0.163704	0.146	0.038	6.28e-26
NDUFS8	1.04e-18	0.1171	0.407	0.248	2.37e-14		MAPKAPK3	7.7e-31	0.186141	0.219	0.071	1.75e-26		PFKL	1.59815e-21	0.122455	0.303	0.156	3.63467e-17		PTPA	2.93321e-30	0.200803	0.292	0.106	6.67101e-26		DNAJB6	3.69e-10	0.0893529	0.546	0.422	8.38e-06		TRIM69	2.85e-30	0.163701	0.289	0.123	6.48e-26
CYB5R1	2.14e-15	0.117	0.16	0.074	4.88e-11		PPP1R15B	2.99e-27	0.18602	0.383	0.187	6.8e-23		WBP1L	2.39294e-19	0.122455	0.135	0.046	5.44226e-15		RND3	2.35668e-25	0.200745	0.216	0.071	5.3598e-21		C1D	3.48e-18	0.0893385	0.275	0.167	7.91e-14		AKR1A1	4.4e-27	0.163546	0.478	0.266	1e-22
AL138963.4	4.76e-14	0.116959	0.18	0.093	1.08e-09		DSC2	2.11e-28	0.18577	0.15	0.034	4.8e-24		GUSB	4.64655e-20	0.122235	0.225	0.105	1.05676e-15		SCARF1	3.35372e-18	0.200731	0.112	0.027	7.62737e-14		ITPKC	3.62e-18	0.0892002	0.115	0.048	8.24e-14		EHD1	1.69e-18	0.163336	0.277	0.143	3.84e-14
ZNF706	9.02e-20	0.116832	0.515	0.33	2.05e-15		RNPEP	8.28e-40	0.185757	0.289	0.096	1.88e-35		JOSD2	5.98635e-29	0.122189	0.297	0.133	1.36147e-24		GDI1	3.31953e-28	0.200617	0.351	0.146	7.54961e-24		RGS2	7.41e-09	0.0891357	0.347	0.261	0.000168527		MIIP	7.63e-25	0.163264	0.284	0.132	1.74e-20
IFFO1	9.77e-15	0.116779	0.134	0.058	2.22e-10		ODF3B	5.96e-37	0.18567	0.456	0.215	1.36e-32		RUFY1	8.98915e-18	0.122157	0.186	0.084	2.0444e-13		SEC61A1	2.36632e-30	0.200488	0.41	0.185	5.38173e-26		EBNA1BP2	3.96e-14	0.0891132	0.196	0.118	9.01e-10		DNAJB6	1.71e-13	0.163199	0.607	0.422	3.89e-09
ARHGAP27	5.7e-13	0.116727	0.145	0.069	1.3e-08		MRPS18C	4.3e-31	0.185663	0.419	0.204	9.79e-27		SIL1	2.61262e-23	0.122125	0.178	0.065	5.94189e-19		SLC66A2	6.78198e-34	0.200362	0.318	0.113	1.54242e-29		SCAF1	2.6e-21	0.0891062	0.174	0.083	5.91e-17		SLC27A3	1.17e-17	0.163185	0.159	0.066	2.66e-13
ATP1B1	5.96e-18	0.116264	0.173	0.076	1.36e-13		SNX24	1.82e-35	0.185659	0.171	0.034	4.14e-31		CMTM6	8.23034e-25	0.122021	0.498	0.294	1.87183e-20		ARHGAP21	5.12145e-33	0.200092	0.249	0.075	1.16477e-28		CDH11	1.14e-14	0.0890209	0.122	0.059	2.6e-10		CAPNS1	7.87e-20	0.163046	0.538	0.34	1.79e-15
FKBP4	3.29e-27	0.116109	0.201	0.073	7.48e-23		NDUFV3	2.57e-38	0.185561	0.312	0.113	5.85e-34		PURB	3.27104e-21	0.121733	0.209	0.091	7.43932e-17		SH3GL1	5.25798e-29	0.199961	0.234	0.075	1.19582e-24		DBNDD2	1.35e-25	0.0890162	0.282	0.154	3.08e-21		SHKBP1	1.69e-29	0.16292	0.309	0.136	3.85e-25
EGR3	9.28e-12	0.115703	0.129	0.062	2.11e-07		BNC1	2.27e-26	0.185497	0.104	0.013	5.17e-22		NRAS	2.36165e-20	0.121686	0.204	0.09	5.37109e-16		CPPED1	2.60227e-32	0.1999	0.213	0.056	5.91834e-28		SERPINB8	1.4e-17	0.0889551	0.127	0.057	3.18e-13		PPP1R14B	4.75e-13	0.162788	0.412	0.281	1.08e-08
ATN1	6.4e-22	0.115585	0.208	0.09	1.46e-17		CTNNBL1	2.47e-28	0.185486	0.236	0.085	5.63e-24		GDE1	6.58276e-21	0.121684	0.171	0.067	1.49712e-16		STAT6	2.00653e-31	0.199442	0.352	0.139	4.56345e-27		MAGED1	3.81e-18	0.0889376	0.166	0.085	8.66e-14		ABCC3	1.73e-24	0.162704	0.121	0.033	3.93e-20
RER1	8.29e-20	0.115311	0.414	0.253	1.89e-15		CAPNS1	1.08e-29	0.185454	0.521	0.285	2.46e-25		DNAJC13	1.41991e-19	0.121523	0.163	0.063	3.2293e-15		DUXAP8	2.16567e-27	0.199223	0.155	0.034	4.92538e-23		ICMT	2e-19	0.0887488	0.178	0.091	4.55e-15		LSM12	4.89e-35	0.162678	0.307	0.125	1.11e-30
IRF7	6.25e-13	0.114979	0.544	0.382	1.42e-08		MIR29B2CHG	4.27e-12	0.185349	0.158	0.078	9.71e-08		TJP1	7.33586e-19	0.121519	0.161	0.065	1.66839e-14		PLOD2	9.76979e-26	0.198819	0.191	0.057	2.22194e-21		TRAFD1	3.09e-12	0.0885829	0.164	0.096	7.02e-08		SAMD4B	1.29e-26	0.162488	0.28	0.126	2.93e-22
LAMTOR1	1.7e-22	0.114951	0.449	0.269	3.86e-18		WIPI1	7.52e-26	0.185215	0.177	0.056	1.71e-21		PSMD11	3.0021e-23	0.121396	0.346	0.184	6.82768e-19		SIGLEC7	2.63521e-25	0.198654	0.106	0.013	5.99327e-21		IL6R	6.19e-12	0.0885324	0.148	0.086	1.41e-07		ALDOA	1.07e-15	0.162465	0.56	0.394	2.42e-11
TRIM25	9.84e-19	0.114788	0.228	0.112	2.24e-14		FCHO2	1.53e-25	0.185171	0.126	0.026	3.49e-21		SNF8	5.49228e-21	0.121121	0.298	0.156	1.24911e-16		PLEKHG2	2.32231e-22	0.198408	0.268	0.112	5.28163e-18		MOB3C	4.01e-13	0.0885296	0.107	0.052	9.12e-09		STOM	8.49e-26	0.162336	0.41	0.212	1.93e-21
MYO1C	1.37e-23	0.11464	0.203	0.083	3.12e-19		RER1	3.04e-27	0.185058	0.463	0.253	6.91e-23		GTF2H5	2.34568e-21	0.120907	0.328	0.178	5.33478e-17		EBNA1BP2	2.00773e-20	0.198331	0.235	0.098	4.56617e-16		IL10RB	6.62e-20	0.0884398	0.234	0.13	1.51e-15		ALG3	3.63e-22	0.162327	0.235	0.11	8.27e-18
PURB	4.3e-20	0.114584	0.203	0.091	9.77e-16		TNFRSF12A	1.2e-18	0.185027	0.234	0.112	2.72e-14		AP3S1	4.90041e-21	0.120851	0.337	0.185	1.1145e-16		TMED9	3.95214e-22	0.197842	0.428	0.224	8.98836e-18		FKBP10	3.49e-11	0.0884171	0.117	0.064	7.93e-07		BEX3	1.02e-21	0.162242	0.303	0.154	2.31e-17
[truncated: 6,816 more rows]

## Sheet: Supplementary Table 3
Supplementary Table 3: Single-cell RNA sequencing; Gene Set Enrichment Analysis (GSEA) for an individual OSCC patient. All cluster analysis
[truncated: 79 more rows]

[truncated: 5 more sheets: Supplementary Table 4, Supplementary Table 5, Supplementary Table 6, Supplementary Table 7, Supplementary Table 8]
